# Supplementary material for: Regioselective B(3,4)–H arylation of o-carboranes by weak amide coordination at room temperature
Source: PubMed Central journal article supplement — Chem Sci. 2020 May 5;11(39):10764–9. doi: 10.1039/d0sc01515f (PMC8162305; doi:10.1039/d0sc01515f), 2020-05-05

*Supporting Information*

**Regioselective B(3,4)–H Arylation of  
*o*-Carboranes by Weak Amide  
Coordination at Room Temperature**

Yu-Feng Liang,<sup>+</sup> Long Yang,<sup>+</sup> Becky Bongsuiru Jei, Rositha Kuniyil and Lutz Ackermann\*

**Institut für Organische und Biomolekulare Chemie**

**Georg-August-Universität Göttingen**

**Tammannstraße 2, 37077 Göttingen, Germany**

**Lutz.Ackermann@chemie.uni-goettingen.de**

## Table of Contents

|                                                                       |       |
|-----------------------------------------------------------------------|-------|
| General remarks.....                                                  | S-2   |
| Preparation of amide <i>o</i> -carboranes.....                        | S-3   |
| General procedures.....                                               | S-4   |
| Optimization studies.....                                             | S-5   |
| Analytical data for products.....                                     | S-6   |
| Attempts with Other Groups.....                                       | S-16  |
| Mechanistic Studies.....                                              | S-17  |
| Computational Data.....                                               | S-19  |
| X-Ray crystallographic analysis.....                                  | S-70  |
| References.....                                                       | S-153 |
| <sup>1</sup> H, <sup>13</sup> C, and <sup>11</sup> B NMR spectra..... | S-154 |

## General remarks

Catalytic reactions were carried out in Schlenk flasks under a N<sub>2</sub> atmosphere using pre-dried glassware. Chemicals were purchased from commercial sources and used without further purification. Yields refer to isolated compounds estimated to be >95% pure as determined by <sup>1</sup>H NMR and GC. TLC was performed on Merck TLC Silica Gel 60 F<sub>254</sub> with detection under UV light at 254 nm. Chromatographic separations were carried out on Merck Geduran SI-60 (0.040–0.063 mm, 230–400 mesh ASTM). IR spectra were recorded on a Bruker FT-IR alpha-P device. EI-MS was recorded on Jeol *AccuTOF* at 70 eV; ESI-MS was recorded on Bruker Daltonik *micrOTOF* and *maXis*. Melting points (M.p.) were measured on Stuart<sup>TM</sup> melting point apparatus SMP3, and the values are uncorrected. Nuclear magnetic resonance (NMR) spectroscopy was performed at 300, 400, 500 or 600 MHz (<sup>1</sup>H-NMR), 75, 100 or 125 MHz (<sup>13</sup>C-NMR, APT) and 96, 128 or 160 MHz (<sup>11</sup>B-NMR) on Bruker *Avance III HD 300*, *Avance III 300*, *Avance III 400*, *Avance III HD 500*, Varian *Unity-300*, *Inova 500* and *Inova 600* instruments. Chemical shifts ( $\delta$ ) are provided in ppm and spectra refer to non-deuterated solvent signal. X-ray structures were measured on Bruker APEX-II CCD diffractometer.

## Preparation of amide *o*-carboranes

The amide *o*-carboranes **1** were synthesized according to a previously described method:<sup>[1]</sup> B<sub>10</sub>H<sub>12</sub>(CH<sub>3</sub>CN)<sub>2</sub> (1.02 g, 5 mmol) and alkyne (10 mmol) were combined in the presence of AgNO<sub>3</sub> (85 mg, 0.5 mmol) in anhydrous toluene (20 mL) and heated at 70 °C for 24 h under N<sub>2</sub>.

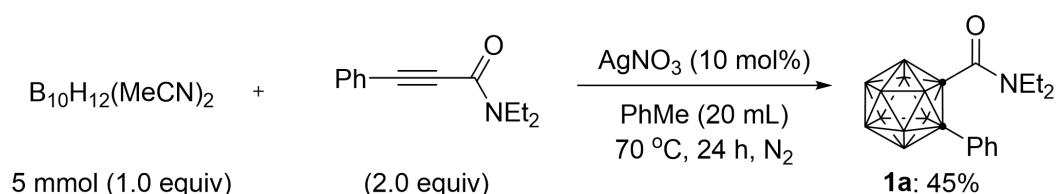

The details for the preparation of **1a**: B<sub>10</sub>H<sub>12</sub>(CH<sub>3</sub>CN)<sub>2</sub> (1.02 g, 5 mmol), *N,N*-diethyl-3-phenylpropiolamide (2.01 g, 10 mmol), AgNO<sub>3</sub> (85 mg, 0.5 mmol) and anhydrous toluene (20 mL) were placed in a 50 mL Schlenk flask under N<sub>2</sub> atmosphere. The mixture was stirred at 70 °C for 24 h. At ambient temperature, the reaction mixture was transferred into a round bottom flask with EtOAc (20 mL) and washed with brine (5.0 mL). The mixture was extracted with EtOAc (3 × 20 mL) and the combined organic layer was dried over Na<sub>2</sub>SO<sub>4</sub>, concentrated under reduced pressure and purified by column chromatography on silica gel using a mixture of *n*-hexane and EtOAc (10:1) to afford the amide *o*-carborane **1a** (0.72 g, 45% yield).

## General procedures

### General procedure A for B(3,4)-H diarylation.

*o*-Carborane **1a** (1-CONEt<sub>2</sub>-2-Ph-*o*-C<sub>2</sub>B<sub>10</sub>H<sub>10</sub>) (0.20 mmol), 4-iodotoluene **2a** (0.48 mmol), Pd(OAc)<sub>2</sub> (10 mol %), AgTFA (0.48 mmol), TFA (0.20 mmol) and HFIP (0.50 mL) were placed in a 25 mL Schlenk tube under N<sub>2</sub> atmosphere. The mixture was stirred at 25 °C for 16 h. Then, the reaction solution was concentrated to dryness in vacuum and purified by column chromatography on silica gel using a mixture of *n*-hexane and EtOAc (20/1 in v/v) and Gel Permeation Chromatography (GPC) to afford the desired product **3aa**.

### General procedure B for B(3)-H monoarylation.

*o*-Carborane **1a** (1-CONEt<sub>2</sub>-2-Ph-*o*-C<sub>2</sub>B<sub>10</sub>H<sub>10</sub>) (0.20 mmol), 4-iodotoluene **2a** (0.08 mmol), Pd(OAc)<sub>2</sub> (10 mol %), Ag<sub>2</sub>CO<sub>3</sub> (0.24 mmol) and HFIP (0.50 mL) were placed in a 25 mL Schlenk tube under N<sub>2</sub> atmosphere. The mixture was stirred at 25 °C for 4 h. Then, 4-iodotoluene **2a** (0.08 mmol) was added. And 4 h later, another portion of 4-iodotoluene **2a** (0.08 mmol) was added. The resulting mixture was then stirred for 8 h. Then, the reaction solution was concentrated to dryness in vacuum and purified by column chromatography on silica gel using a mixture of *n*-hexane and EtOAc (20/1 in v/v) and Gel Permeation Chromatography (GPC) to afford the desired product **4aa**.

## Optimization studies

**Table S1.** Optimization of reaction conditions.<sup>[a]</sup>

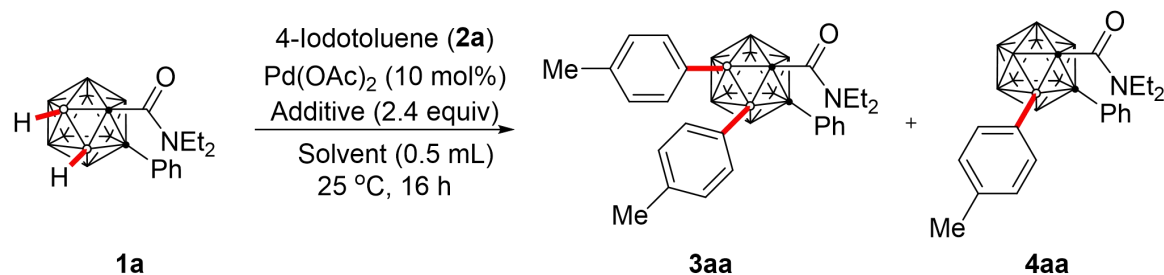

| Entry     | Additive                            | Solvent          | Yield of <b>3aa</b> /% | Yield of <b>4aa</b> /%     |
|-----------|-------------------------------------|------------------|------------------------|----------------------------|
| 1         | AgTFA                               | PhMe             | 0                      | 0                          |
| 2         | AgTFA                               | DCE              | 0                      | 0                          |
| 3         | AgTFA                               | MeCN             | 0                      | 0                          |
| 4         | AgTFA                               | 1,4-Dioxane      | 0                      | 0                          |
| 5         | AgTFA                               | H <sub>2</sub> O | 0                      | 0                          |
| 6         | AgTFA                               | TFE              | 21                     | 3                          |
| 7         | AgTFA                               | HFIP             | 59                     | 4                          |
| 8         | AgTFA                               | HFIP             | 0                      | 0 <sup>[b]</sup>           |
| 9         | ---                                 | HFIP             | 0                      | 0                          |
| 10        | AgOAc                               | HFIP             | 5                      | <3                         |
| 11        | Ag <sub>2</sub> O                   | HFIP             | <3                     | <3                         |
| 12        | K <sub>2</sub> HPO <sub>4</sub>     | HFIP             | 0                      | 0                          |
| 13        | Na <sub>2</sub> CO <sub>3</sub>     | HFIP             | 0                      | 0                          |
| 14        | K <sub>2</sub> CO <sub>3</sub>      | HFIP             | 0                      | 0                          |
| 15        | NEt <sub>3</sub>                    | HFIP             | 0                      | 0                          |
| 16        | AgTFA                               | HFIP             | 53                     | 4 <sup>[c]</sup>           |
| 17        | AgTFA                               | HFIP             | 42                     | 3 <sup>[d]</sup>           |
| <b>18</b> | <b>AgTFA</b>                        | <b>HFIP</b>      | <b>71</b>              | <b>&lt;3<sup>[e]</sup></b> |
| 19        | Ag <sub>2</sub> CO <sub>3</sub>     | HFIP             | 9                      | 34 <sup>[f]</sup>          |
| <b>20</b> | <b>Ag<sub>2</sub>CO<sub>3</sub></b> | <b>HFIP</b>      | <b>5</b>               | <b>55<sup>[f,g]</sup></b>  |

[a] Reaction conditions: **1a** (0.20 mmol), **2** (0.48 mmol), Pd(OAc)<sub>2</sub> (10 mol %), additive (0.48 mmol), solvent (0.50 mL), 25 °C, 16 h, isolated yield. [b] Without Pd(OAc)<sub>2</sub>. [c] At 40 °C. [d] At 60 °C. [e] TFA (0.2 mmol) was added. [f] **1a** (0.20 mmol), **2a** (0.24 mmol), Ag<sub>2</sub>CO<sub>3</sub> (0.24 mmol). [g] **2a** was added in three portions every 4 h. DCE = dichloroethane, TFE = 2,2,2-trifluoroethanol, HFIP = hexafluoroisopropanol, TFA = trifluoroacetic acid.

## Analytical data for products

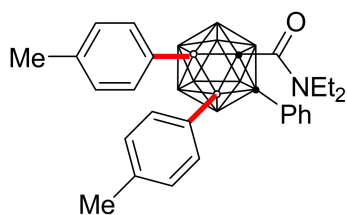

**3aa.** The representative procedure **A** was followed using *o*-carborane **1a** (1-CONEt<sub>2</sub>-2-Ph-*o*-C<sub>2</sub>B<sub>10</sub>H<sub>10</sub>) (64 mg, 0.20 mmol) and 4-iodotoluene **2a** (105 mg, 0.48 mmol). Isolation by column chromatography (*n*-hexane/EtOAc: 20/1) yielded **3aa** (71 mg, 71%) as a colorless solid. **M.p.** = 171–172 °C. **<sup>1</sup>H NMR** (500 MHz, CDCl<sub>3</sub>): δ = 7.45 (d, *J* = 8.5 Hz, 2H), 7.39–7.32 (m, 3H), 7.22 (dd, *J* = 8.5, 7.3 Hz, 2H), 7.17 (d, *J* = 8.0 Hz, 2H), 6.94–6.90 (m, 4H), 3.49–3.44 (m, 2H), 3.26–3.22 (m, 2H), 2.28 (s, 3H), 2.24 (s, 3H), 1.00 (t, *J* = 7.0 Hz, 6H). **<sup>13</sup>C NMR** (125 MHz, CDCl<sub>3</sub>): δ = 156.6 (C<sub>q</sub>), 138.1 (C<sub>q</sub>), 137.7 (C<sub>q</sub>), 136.5 (CH), 133.9 (CH), 133.3 (C<sub>q</sub>), 130.0 (CH), 129.3 (CH), 128.1 (CH), 127.6 (CH), 127.5 (CH), 85.5 (C<sub>q</sub>), 79.3 (C<sub>q</sub>), 43.7 (CH<sub>2</sub>), 21.2 (CH<sub>3</sub>), 21.1 (CH<sub>3</sub>), 12.9 (CH<sub>3</sub>). **<sup>11</sup>B NMR** (160 MHz, CDCl<sub>3</sub>): δ = 0.65 (2B), -1.38 (1B), -3.61 (1B), -6.20 (1B), -10.54 (5B). **IR** (ATR): 2978, 2566, 1653, 1608, 1415, 1264, 1191, 772 cm<sup>-1</sup>. **MS** (ESI) *m/z* (relative intensity): 522 (100) [M+Na]<sup>+</sup>, 500 (40) [M+H]<sup>+</sup>. **HR-MS** (ESI): *m/z* calcd. for C<sub>27</sub>H<sub>38</sub><sup>10</sup>B<sub>2</sub><sup>11</sup>B<sub>8</sub>NO [M+H]<sup>+</sup>: 500.3964, found: 500.3951.

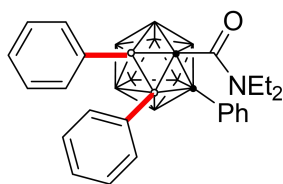

**3ab.** The representative procedure **A** was followed using *o*-carborane **1a** (1-CONEt<sub>2</sub>-2-Ph-*o*-C<sub>2</sub>B<sub>10</sub>H<sub>10</sub>) (64 mg, 0.20 mmol) and iodobenzene **2b** (98 mg, 0.48 mmol). Isolation by column chromatography (*n*-hexane/EtOAc: 20/1) yielded **3ab** (64 mg, 68%) as a colorless solid. **M.p.** = 197–198 °C. **<sup>1</sup>H NMR** (400 MHz, CDCl<sub>3</sub>): δ = 7.53–7.42 (m, 4H), 7.37–7.32 (m, 1H), 7.29–7.15 (m, 6H), 7.14–7.04 (m, 4H), 3.50–3.41 (m, 2H), 3.26–3.20 (m, 2H), 0.99 (t, *J* = 7.0 Hz, 6H). **<sup>13</sup>C NMR** (100 MHz, CDCl<sub>3</sub>): δ = 156.6 (C<sub>q</sub>), 136.6 (CH), 134.0 (CH), 133.2 (C<sub>q</sub>), 130.1 (CH), 129.4 (CH), 128.4 (CH), 128.0 (CH), 127.6 (CH), 127.2 (CH), 126.6 (CH), 86.0 (C<sub>q</sub>), 79.7 (C<sub>q</sub>), 43.8 (CH<sub>2</sub>), 12.9 (CH<sub>3</sub>). **<sup>11</sup>B NMR** (128 MHz, CDCl<sub>3</sub>): δ

= 0.34 (2B), -1.31 (1B), -3.28 (1B), -5.82 (1B), -10.20 (5B). **IR** (ATR): 2973, 2567, 1647, 1430, 1266, 1208, 696  $\text{cm}^{-1}$ . **MS** (ESI)  $m/z$  (relative intensity): 494 (100)  $[\text{M}+\text{Na}]^+$ , 472 (40)  $[\text{M}+\text{H}]^+$ . **HR-MS** (ESI):  $m/z$  calcd. for  $\text{C}_{25}\text{H}_{34}^{10}\text{B}_2^{11}\text{B}_8\text{NO}$   $[\text{M}+\text{H}]^+$ : 472.3650, found: 472.3631.

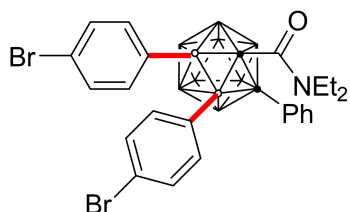

**3ac.** The representative procedure **A** was followed using *o*-carborane **1a** (1- $\text{CONEt}_2$ -2- $\text{Ph}$ -*o*- $\text{C}_2\text{B}_{10}\text{H}_{10}$ ) (64 mg, 0.20 mmol) and 1-bromo-4-iodobenzene **2c** (136 mg, 0.48 mmol). Isolation by column chromatography (*n*-hexane/EtOAc: 20/1) yielded **3ac** (76 mg, 61%) as a colorless solid. **M.p.** = 205–206  $^\circ\text{C}$ .  **$^1\text{H}$  NMR** (300 MHz,  $\text{CDCl}_3$ ):  $\delta$  = 7.50–7.39 (m, 3H), 7.32–7.27 (m, 5H), 7.25–7.22 (m, 3H), 7.21–7.14 (m, 2H), 3.60–3.42 (m, 4H), 1.05 (t,  $J$  = 6.9 Hz, 6H).  **$^{13}\text{C}$  NMR** (75 MHz,  $\text{CDCl}_3$ ):  $\delta$  = 156.2 ( $\text{C}_q$ ), 138.0 (CH), 135.6 (CH), 132.0 ( $\text{C}_q$ ), 130.5 (CH), 129.8 (CH), 129.7 (CH), 129.6 (CH), 127.9 (CH), 123.6 ( $\text{C}_q$ ), 123.2 ( $\text{C}_q$ ), 84.6 ( $\text{C}_q$ ), 78.5 ( $\text{C}_q$ ), 44.0 ( $\text{CH}_2$ ), 13.1 ( $\text{CH}_3$ ).  **$^{11}\text{B}$  NMR** (96 MHz,  $\text{CDCl}_3$ ):  $\delta$  = 0.22 (3B), -3.11 (1B), -6.02 (1B), -9.94 (5B). **IR** (ATR): 2573, 1647, 1578, 1487, 1381, 1205, 1010, 693  $\text{cm}^{-1}$ . **MS** (ESI)  $m/z$  (relative intensity): 652 (100)  $[\text{M}+\text{Na}]^+$ , 630 (10)  $[\text{M}+\text{H}]^+$ . **HR-MS** (ESI):  $m/z$  calcd. for  $\text{C}_{25}\text{H}_{31}^{11}\text{B}_{10}^{79}\text{Br}_2\text{NONa}$   $[\text{M}+\text{Na}]^+$ : 652.1657, found: 652.1642.

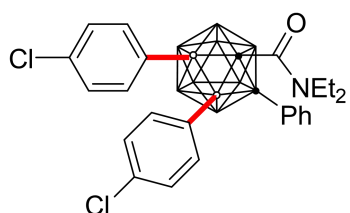

**3ad.** The representative procedure **A** was followed using *o*-carborane **1a** (1- $\text{CONEt}_2$ -2- $\text{Ph}$ -*o*- $\text{C}_2\text{B}_{10}\text{H}_{10}$ ) (64 mg, 0.20 mmol) and 1-chloro-4-iodobenzene **2d** (115 mg, 0.48 mmol). Isolation by column chromatography (*n*-hexane/EtOAc: 20/1) yielded **3ad** (73 mg, 68%) as a colorless solid. **M.p.** = 185–186  $^\circ\text{C}$ .  **$^1\text{H}$  NMR** (300 MHz,  $\text{CDCl}_3$ ):  $\delta$  = 7.48–7.40 (m, 3H), 7.35–7.22 (m, 6H), 7.17–7.08 (m, 4H), 3.54–3.40 (m, 4H), 1.06 (t,  $J$  = 7.0 Hz, 6H).  **$^{13}\text{C}$  NMR** (75 MHz,  $\text{CDCl}_3$ ):  $\delta$  = 156.2 ( $\text{C}_q$ ), 137.8 (CH), 135.3 (CH), 135.0 ( $\text{C}_q$ ), 134.7 ( $\text{C}_q$ ), 132.1 ( $\text{C}_q$ ), 129.9 (CH), 129.6 (CH), 128.0 (CH), 127.5 (CH), 126.9 (CH), 84.9 ( $\text{C}_q$ ), 78.9 ( $\text{C}_q$ ), 44.2 ( $\text{CH}_2$ ), 12.9 ( $\text{CH}_3$ ).  **$^{11}\text{B}$  NMR** (96 MHz,  $\text{CDCl}_3$ ):  $\delta$  = 0.49 (3B),



-3.10 (1B), -6.38 (1B), -10.40 (5B). **IR** (ATR): 2571, 1648, 1584, 1489, 1268, 1205, 1092, 730  $\text{cm}^{-1}$ . **MS** (ESI)  $m/z$  (relative intensity): 564 (100)  $[\text{M}+\text{Na}]^+$ , 542 (10)  $[\text{M}+\text{H}]^+$ . **HR-MS** (ESI):  $m/z$  calcd. for  $\text{C}_{25}\text{H}_{31}^{11}\text{B}_{10}^{35}\text{Cl}_2\text{NONa}$   $[\text{M}+\text{Na}]^+$ : 564.2649, found: 564.2640.

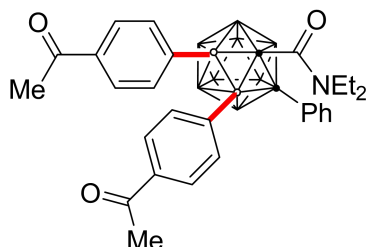

**3ae.** The representative procedure **A** was followed using *o*-carborane **1a** (1- $\text{CONEt}_2$ -2- $\text{Ph}$ -*o*- $\text{C}_2\text{B}_{10}\text{H}_{10}$ ) (64 mg, 0.20 mmol) and 1-(4-iodophenyl)ethanone **2e** (118 mg, 0.48 mmol). Isolation by column chromatography (*n*-hexane/EtOAc: 20/1) yielded **3ae** (64 mg, 58%) as a colorless solid. **M.p.** = 244–245 °C.  **$^1\text{H}$  NMR** (300 MHz,  $\text{CDCl}_3$ ):  $\delta$  = 7.74 (d,  $J$  = 8.3 Hz, 2H), 7.66 (d,  $J$  = 8.3 Hz, 2H), 7.51–7.39 (m, 7H), 7.34–7.27 (m, 2H), 3.60–3.45 (m, 4H), 2.56 (s, 3H), 2.55 (s, 3H), 1.09 (t,  $J$  = 6.9 Hz, 6H).  **$^{13}\text{C}$  NMR** (75 MHz,  $\text{CDCl}_3$ ):  $\delta$  = 198.3 ( $\text{C}_q$ ), 198.1 ( $\text{C}_q$ ), 156.0 ( $\text{C}_q$ ), 136.6 ( $\text{C}_q$ ), 136.5 (CH), 136.4 ( $\text{C}_q$ ), 134.2 (CH), 131.8 ( $\text{C}_q$ ), 130.1 (CH), 129.7 (CH), 128.0 (CH), 127.0 (CH), 126.0 (CH), 84.9 ( $\text{C}_q$ ), 78.5 ( $\text{C}_q$ ), 43.9 ( $\text{CH}_2$ ), 26.7 ( $\text{CH}_3$ ), 26.5 ( $\text{CH}_3$ ), 13.0 ( $\text{CH}_3$ ).  **$^{11}\text{B}$  NMR** (96 MHz,  $\text{CDCl}_3$ ):  $\delta$  = 0.58 (3B), -2.61 (1B), -5.98 (1B), -9.67 (5B). **IR** (ATR): 2572, 1679, 1642, 1357, 1266, 1200, 730, 590  $\text{cm}^{-1}$ . **MS** (ESI)  $m/z$  (relative intensity): 578 (100)  $[\text{M}+\text{Na}]^+$ , 556 (10)  $[\text{M}+\text{H}]^+$ . **HR-MS** (ESI):  $m/z$  calcd. for  $\text{C}_{29}\text{H}_{37}^{10}\text{B}_2^{11}\text{B}_8\text{NO}_3\text{Na}$   $[\text{M}+\text{Na}]^+$ : 578.3683, found: 578.3676.

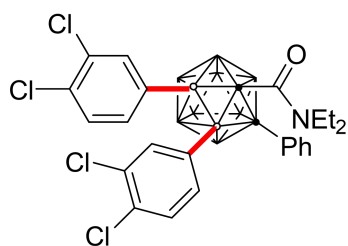

**3af.** The representative procedure **A** was followed using *o*-carborane **1a** (1- $\text{CONEt}_2$ -2- $\text{Ph}$ -*o*- $\text{C}_2\text{B}_{10}\text{H}_{10}$ ) (64 mg, 0.20 mmol) and 1,2-dichloro-4-iodobenzene **2f** (131 mg, 0.48 mmol). Isolation by column chromatography (*n*-hexane/EtOAc: 20/1) yielded **3af** (78 mg, 64%) as a colorless solid. **M.p.** = 208–209 °C.  **$^1\text{H}$  NMR** (300 MHz,  $\text{CDCl}_3$ ):  $\delta$  = 7.48–7.40 (m, 4H), 7.36–7.26 (m, 4H), 7.22–7.11 (m, 3H), 3.60–3.45 (m, 4H), 1.13 (t,  $J$

= 6.9 Hz, 6H).  $^{13}\text{C}$  NMR (75 MHz,  $\text{CDCl}_3$ ):  $\delta$  = 155.8 ( $\text{C}_q$ ), 138.1 (CH), 135.6 (CH), 135.4 (CH), 133.2 (CH), 133.0 ( $\text{C}_q$ ), 132.9 ( $\text{C}_q$ ), 132.0 ( $\text{C}_q$ ), 131.5 ( $\text{C}_q$ ), 130.9 ( $\text{C}_q$ ), 130.2 (CH), 129.7 (CH), 129.5 (CH), 128.7 (CH), 128.2 (CH), 85.0 ( $\text{C}_q$ ), 78.2 ( $\text{C}_q$ ), 44.2 ( $\text{CH}_2$ ), 13.0 ( $\text{CH}_3$ ).  $^{11}\text{B}$  NMR (96 MHz,  $\text{CDCl}_3$ ):  $\delta$  = 0.76 (3B), -3.10 (1B), -6.49 (1B), -10.24 (5B). IR (ATR): 2578, 1646, 1473, 1424, 1203, 1028, 695  $\text{cm}^{-1}$ . MS (ESI)  $m/z$  (relative intensity): 632 (100)  $[\text{M}+\text{Na}]^+$ , 610 (10)  $[\text{M}+\text{H}]^+$ . HR-MS (ESI):  $m/z$  calcd. for  $\text{C}_{25}\text{H}_{29}^{11}\text{B}_{10}^{35}\text{Cl}_4\text{NONa}$   $[\text{M}+\text{Na}]^+$ : 632.1879, found: 632.1867.

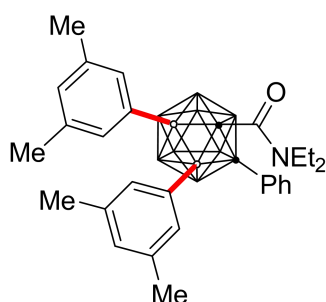

**3ag.** The representative procedure **A** was followed using *o*-carborane **1a** (1- $\text{CONEt}_2$ -2- $\text{Ph}$ -*o*- $\text{C}_2\text{B}_{10}\text{H}_{10}$ ) (64 mg, 0.20 mmol) and 1-iodo-3,5-dimethylbenzene **2g** (112 mg, 0.48 mmol). Isolation by column chromatography (*n*-hexane/EtOAc: 20/1) yielded **3ag** (66 mg, 63%) as a colorless solid. **M.p.** = 203–205 °C.  $^1\text{H}$  NMR (300 MHz,  $\text{CDCl}_3$ ):  $\delta$  = 7.52 (d,  $J$  = 7.4 Hz, 2H), 7.40–7.32 (m, 1H), 7.29–7.18 (m, 4H), 7.00–6.90 (m, 3H), 6.87 (s, 1H), 3.62 (q,  $J$  = 7.0 Hz, 2H), 3.09 (q,  $J$  = 7.0 Hz, 2H), 2.19 (s, 6H), 2.16 (s, 6H), 1.08 (t,  $J$  = 7.0 Hz, 6H).  $^{13}\text{C}$  NMR (75 MHz,  $\text{CDCl}_3$ ):  $\delta$  = 156.8 ( $\text{C}_q$ ), 136.2 ( $\text{C}_q$ ), 135.6 ( $\text{C}_q$ ), 134.3 (CH), 134.3 ( $\text{C}_q$ ), 131.8 (CH), 130.4 (CH), 130.2 (CH), 129.7 (CH), 129.3 (CH), 127.5 (CH), 87.6 ( $\text{C}_q$ ), 80.3 ( $\text{C}_q$ ), 43.5 ( $\text{CH}_2$ ), 21.4 ( $\text{CH}_3$ ), 21.2 ( $\text{CH}_3$ ), 12.7 ( $\text{CH}_3$ ).  $^{11}\text{B}$  NMR (96 MHz,  $\text{CDCl}_3$ ):  $\delta$  = 0.69 (2B), -1.17 (1B), -3.10 (1B), -5.90 (1B), -10.05 (5B). IR (ATR): 2916, 2557, 1646, 1420, 1264, 1183, 855, 689  $\text{cm}^{-1}$ . MS (ESI)  $m/z$  (relative intensity): 550 (100)  $[\text{M}+\text{Na}]^+$ , 528 (10)  $[\text{M}+\text{H}]^+$ . HR-MS (ESI):  $m/z$  calcd. for  $\text{C}_{29}\text{H}_{41}^{10}\text{B}_2^{11}\text{B}_8\text{NONa}$   $[\text{M}+\text{Na}]^+$ : 550.4097, found: 550.4096.

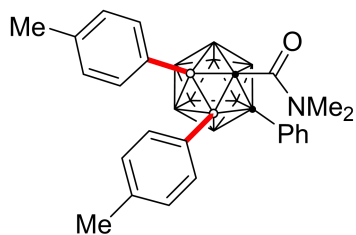

**3ba.** The representative procedure **A** was followed using *o*-carborane **1b** (1-CONMe<sub>2</sub>-2-Ph-*o*-C<sub>2</sub>B<sub>10</sub>H<sub>10</sub>) (58 mg, 0.20 mmol) and 4-iodotoluene **2a** (105 mg, 0.48 mmol). Isolation by column chromatography (*n*-hexane/EtOAc: 20/1) yielded **3ba** (48 mg, 51%) as a colorless solid. **M.p.** = 158–159 °C. **<sup>1</sup>H NMR** (400 MHz, CDCl<sub>3</sub>): δ = 7.45 (d, *J* = 7.4 Hz, 2H), 7.40–7.36 (m, 1H), 7.34–7.23 (m, 4H), 7.20 (d, *J* = 7.9 Hz, 2H), 6.99–6.90 (m, 4H), 3.04 (s, 6H), 2.31 (s, 3H), 2.29 (s, 3H). **<sup>13</sup>C NMR** (100 MHz, CDCl<sub>3</sub>): δ = 157.7 (C<sub>q</sub>), 138.3 (C<sub>q</sub>), 137.9 (C<sub>q</sub>), 136.3 (CH), 133.9 (CH), 133.1 (C<sub>q</sub>), 130.0 (CH), 129.5 (CH), 128.4 (CH), 127.8 (CH), 127.6 (CH), 85.9 (C<sub>q</sub>), 78.6 (C<sub>q</sub>), 40.8 (CH<sub>3</sub>), 21.3 (CH<sub>3</sub>), 21.2 (CH<sub>3</sub>). **<sup>11</sup>B NMR** (128 MHz, CDCl<sub>3</sub>): δ = 0.7 (2B), -1.3 (1B), -3.2 (1B), -6.4 (1B), -10.6 (5B). **IR** (ATR): 2921, 2570, 1644, 1393, 1195, 743, 693 cm<sup>-1</sup>. **MS** (ESI) *m/z* (relative intensity): 473 (100) [M+H]<sup>+</sup>. **HR-MS** (ESI): *m/z* calcd. for C<sub>25</sub>H<sub>34</sub><sup>10</sup>B<sub>1</sub><sup>11</sup>B<sub>9</sub>NO [M+H]<sup>+</sup>: 473.3607, found: 473.3606.

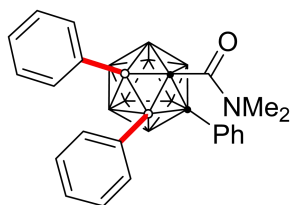

**3bb.** The representative procedure **A** was followed using *o*-carborane **1b** (1-CONMe<sub>2</sub>-2-Ph-*o*-C<sub>2</sub>B<sub>10</sub>H<sub>10</sub>) (58 mg, 0.20 mmol) and iodobenzene **2b** (98 mg, 0.48 mmol). Isolation by column chromatography (*n*-hexane/EtOAc: 20/1) yielded **3bb** (47 mg, 53%) as a colorless solid. **M.p.** = 99–100 °C. **<sup>1</sup>H NMR** (400 MHz, CDCl<sub>3</sub>): δ = 7.47–7.41 (m, 4H), 7.40–7.35 (m, 1H), 7.32–7.29 (m, 2H), 7.28–7.20 (m, 4H), 7.18–7.10 (m, 4H), 3.03 (s, 6H). **<sup>13</sup>C NMR** (100 MHz, CDCl<sub>3</sub>): δ = 157.7 (C<sub>q</sub>), 136.4 (CH), 133.9 (CH), 133.0 (C<sub>q</sub>), 130.0 (CH), 129.6 (CH), 128.6 (CH), 128.2 (CH), 127.9 (CH), 127.5 (CH), 126.8 (CH), 86.4 (C<sub>q</sub>), 79.0 (C<sub>q</sub>), 40.8 (CH<sub>3</sub>). **<sup>11</sup>B NMR** (128 MHz, CDCl<sub>3</sub>): δ = 0.57 (2B), -1.13 (1B), -3.10 (1B), -6.27 (1B), -10.23 (5B). **IR** (ATR): 3053, 2581, 1654, 1493, 1373, 1167, 744 cm<sup>-1</sup>. **MS** (ESI) *m/z* (relative intensity): 444 (100) [M+H]<sup>+</sup>, 466 (10) [M+Na]<sup>+</sup>. **HR-MS** (ESI): *m/z* calcd. for C<sub>23</sub>H<sub>30</sub><sup>10</sup>B<sub>2</sub><sup>11</sup>B<sub>8</sub>NO [M+H]<sup>+</sup>: 444.3336, found: 444.3328.

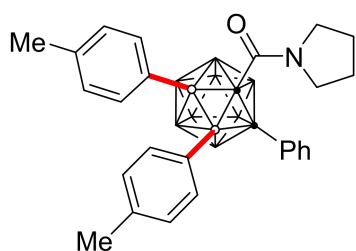

**3ca.** The representative procedure **A** was followed using *o*-carborane **1c** (1-CON(CH<sub>2</sub>)<sub>4</sub>-2-Ph-*o*-C<sub>2</sub>B<sub>10</sub>H<sub>10</sub>) (63 mg, 0.20 mmol) and 4-iodotoluene **2a** (105 mg, 0.48 mmol). Isolation by column chromatography (*n*-hexane/EtOAc: 20/1) yielded **3ca** (59 mg, 60%) as a pink solid. **M.p.** = 228–230 °C. **<sup>1</sup>H NMR** (400 MHz, CDCl<sub>3</sub>): δ = 7.44–7.38 (m, 2H), 7.36–7.28 (m, 3H), 7.22–7.16 (m, 2H), 7.16–7.10 (m, 2H), 6.96–6.87 (m, 4H), 3.65–3.28 (m, 4H), 2.25 (s, 3H), 2.23 (s, 3H), 1.80–1.63 (m, 4H). **<sup>13</sup>C NMR** (100 MHz, CDCl<sub>3</sub>): δ = 155.7 (C<sub>q</sub>), 138.1 (C<sub>q</sub>), 137.7 (C<sub>q</sub>), 136.6 (CH), 133.6 (CH), 132.9 (C<sub>q</sub>), 129.9 (CH), 129.4 (CH), 128.3 (CH), 127.7 (CH), 127.5 (CH), 85.0 (C<sub>q</sub>), 78.7 (C<sub>q</sub>), 50.5 (overlapped, CH<sub>2</sub>), 21.2 (CH<sub>3</sub>), 21.2 (CH<sub>3</sub>). **<sup>11</sup>B NMR** (128 MHz, CDCl<sub>3</sub>): δ = 0.57 (2B), -1.61 (1B), -3.32 (1B), -6.45 (1B), -10.78 (5B). **IR** (ATR): 2975, 2878, 2570, 1639, 1446, 1225, 865, 753, 690 cm<sup>-1</sup>. **MS** (ESI) *m/z* (relative intensity): 498 (20) [M+H]<sup>+</sup>, 520 (100) [M+Na]<sup>+</sup>. **HR-MS** (ESI) *m/z* calcd for C<sub>27</sub>H<sub>35</sub><sup>10</sup>B<sub>2</sub><sup>11</sup>B<sub>8</sub>NONa [M+Na]<sup>+</sup> 520.3627, found 520.3623.

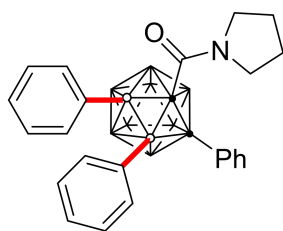

**3cb.** The representative procedure **A** was followed using *o*-carborane **1c** (1-CON(CH<sub>2</sub>)<sub>4</sub>-2-Ph-*o*-C<sub>2</sub>B<sub>10</sub>H<sub>10</sub>) (63 mg, 0.20 mmol) and iodobenzene **2b** (98 mg, 0.48 mmol). Isolation by column chromatography (*n*-hexane/EtOAc: 20/1) yielded **3cb** (50 mg, 53%) as a colorless solid. **M.p.** = 176–177 °C. **<sup>1</sup>H NMR** (500 MHz, CDCl<sub>3</sub>): δ = 7.51–7.44 (m, 2H), 7.43–7.38 (m, 2H), 7.35–7.30 (m, 1H), 7.25–7.24 (m, 1H), 7.24–7.16 (m, 5H), 7.13–7.04 (m, 4H), 3.63–3.41 (m, 4H), 1.83–1.61 (m, 4H). **<sup>13</sup>C NMR** (125 MHz, CDCl<sub>3</sub>): δ = 155.7 (C<sub>q</sub>), 136.7 (CH), 133.6 (CH), 132.8 (C<sub>q</sub>), 129.9 (CH), 129.5 (CH), 128.4 (CH), 128.1 (CH), 127.7 (CH), 127.4 (CH), 126.6 (CH), 85.5 (C<sub>q</sub>), 79.1 (C<sub>q</sub>), 50.5 (overlapped, CH<sub>2</sub>). **<sup>11</sup>B NMR** (96 MHz, CDCl<sub>3</sub>): δ = 0.48 (2B), -1.36 (1B), -3.15 (1B), -6.18 (1B), -10.26 (5B). **IR** (ATR): 2921, 2570, 1643, 1389, 1195, 861, 743, 692 cm<sup>-1</sup>. **MS** (ESI) *m/z* (relative

intensity): 471 (100)  $[M+H]^+$ , 493 (10)  $[M+Na]^+$ . **HR-MS** (ESI):  $m/z$  calcd. for  $C_{25}H_{32}^{10}B_1^{11}B_9NO$   $[M+H]^+$ : 471.3450, found: 471.3448.

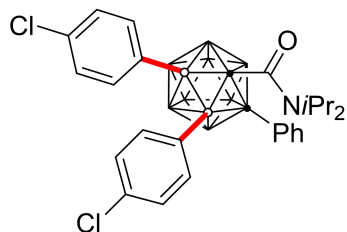

**3dd.** The representative procedure **A** was followed using *o*-carborane **1d** (1-CON<sup>*i*</sup>Pr<sub>2</sub>-2-Ph-*o*-C<sub>2</sub>B<sub>10</sub>H<sub>10</sub>) (70 mg, 0.20 mmol) and 1-chloro-4-iodobenzene **2d** (114 mg, 0.48 mmol). Isolation by column chromatography (*n*-hexane/EtOAc: 20/1) yielded **3dd** (61 mg, 54%) as a colorless solid. **M.p.** = 232–233 °C. **<sup>1</sup>H NMR** (400 MHz, CDCl<sub>3</sub>):  $\delta$  = 7.52 (d,  $J$  = 7.4 Hz, 2H), 7.45–7.41 (m, 1H), 7.35 (d,  $J$  = 8.4 Hz, 2H), 7.32–7.27 (m, 2H), 7.19 (d,  $J$  = 8.6 Hz, 2H), 7.14 (d,  $J$  = 8.4 Hz, 2H), 7.07 (d,  $J$  = 8.4 Hz, 2H), 5.24–5.18 (m, 1H), 3.44–3.39 (m, 1H), 1.29 (d,  $J$  = 6.7 Hz, 6H), 1.04 (d,  $J$  = 6.7 Hz, 6H). **<sup>13</sup>C NMR** (100 MHz, CDCl<sub>3</sub>):  $\delta$  = 154.5 (C<sub>q</sub>), 137.9 (CH), 136.1 (CH), 134.7 (C<sub>q</sub>), 134.5 (C<sub>q</sub>), 132.0 (C<sub>q</sub>), 129.9 (CH), 129.5 (CH), 128.0 (CH), 127.5 (CH), 126.5 (CH), 83.9 (C<sub>q</sub>), 79.1 (C<sub>q</sub>), 50.3 (CH), 49.4 (CH), 20.5 (CH<sub>3</sub>), 20.3 (CH<sub>3</sub>), 19.7 (CH<sub>3</sub>), 19.6 (CH<sub>3</sub>). **<sup>11</sup>B NMR** (128 MHz, CDCl<sub>3</sub>):  $\delta$  = 1.47 (1B), -1.05 (2B), -3.30 (1B), -6.75 (1B), -10.90 (5B). **IR** (ATR): 2968, 2620, 2585, 1657, 1586, 1491, 1369, 1296, 691 cm<sup>-1</sup>. **MS** (ESI)  $m/z$  (relative intensity): 569 (100)  $[M+H]^+$ , 591 (10)  $[M+Na]^+$ . **HR-MS** (ESI):  $m/z$  calcd. for  $C_{27}H_{36}^{10}B_1^{11}B_9^{35}Cl_2NO$   $[M+H]^+$ : 569.3141, found: 569.3142.

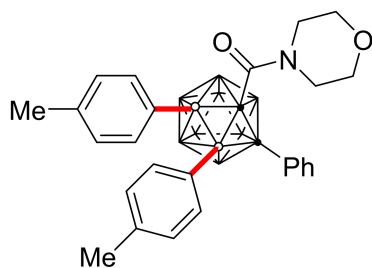

**3ea.** The representative procedure **A** was followed using *o*-carborane **1e** (1-CON(CH<sub>2</sub>)<sub>4</sub>O-2-Ph-*o*-C<sub>2</sub>B<sub>10</sub>H<sub>10</sub>) (67 mg, 0.20 mmol) and 4-iodotoluene **2a** (105 mg, 0.48 mmol). Isolation by column chromatography (*n*-hexane/EtOAc: 20/1) yielded **3ea** (54 mg, 52%) as a colorless solid. **M.p.** = 258–259 °C. **<sup>1</sup>H NMR** (400 MHz, CDCl<sub>3</sub>):  $\delta$  = 7.49–7.41 (m, 2H), 7.40–7.32 (m, 3H), 7.28–7.21 (m, 2H), 7.21–7.14 (m, 2H), 7.01 (d,  $J$  = 7.9 Hz, 2H),

6.96 (d,  $J = 7.8$  Hz, 2H), 3.73–3.58 (m, 4H), 3.48–3.32 (m, 4H), 2.34 (s, 3H), 2.28 (s, 3H).  $^{13}\text{C}$  NMR (100 MHz,  $\text{CDCl}_3$ ):  $\delta = 157.6$  ( $\text{C}_q$ ), 138.7 ( $\text{C}_q$ ), 138.2 ( $\text{C}_q$ ), 136.2 (CH), 134.2 (CH), 133.4 ( $\text{C}_q$ ), 130.1 (CH), 129.6 (CH), 128.5 (CH), 128.0 (CH), 127.8 (CH), 86.7 ( $\text{C}_q$ ), 78.6 ( $\text{C}_q$ ), 66.5 ( $\text{CH}_2$ ), 47.9 ( $\text{CH}_2$ ), 21.3 ( $\text{CH}_3$ ), 21.2 ( $\text{CH}_3$ ).  $^{11}\text{B}$  NMR (128 MHz,  $\text{CDCl}_3$ ):  $\delta = 0.67$  (2B), -0.88 (1B), -3.11 (1B), -6.12 (1B), -10.53 (5B). IR (ATR): 2843, 2549, 1660, 1447, 1411, 1264, 1225, 771  $\text{cm}^{-1}$ . MS (ESI)  $m/z$  (relative intensity): 514 (70)  $[\text{M}+\text{H}]^+$ , 536 (100)  $[\text{M}+\text{Na}]^+$ . HR-MS (ESI):  $m/z$  calcd. for  $\text{C}_{27}\text{H}_{35}^{10}\text{B}_2^{11}\text{B}_8\text{NO}_2\text{Na}$   $[\text{M}+\text{Na}]^+$ : 536.3576, found: 536.3557.

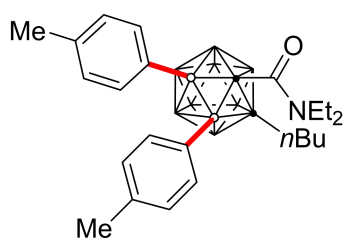

**3fa.** The representative procedure **A** was followed using *o*-carborane **1f** (1-CONEt<sub>2</sub>-2-*n*Bu-*o*-C<sub>2</sub>B<sub>10</sub>H<sub>10</sub>) (60 mg, 0.20 mmol) and 4-iodotoluene **2a** (105 mg, 0.48 mmol). Isolation by column chromatography (*n*-hexane/EtOAc: 20/1) yielded **3fa** (45 mg, 47%) as a colorless solid. **M.p.** = 88–89 °C.  $^1\text{H}$  NMR (400 MHz,  $\text{CDCl}_3$ ):  $\delta = 7.39$  (d,  $J = 7.9$  Hz, 2H), 7.17 (d,  $J = 7.8$  Hz, 2H), 7.12 (d,  $J = 7.9$  Hz, 2H), 6.99 (d,  $J = 7.8$  Hz, 2H), 4.15–3.66 (m, 2H), 3.66–3.46 (m, 2H), 2.56–2.46 (m, 1H), 2.38 (s, 3H), 2.30 (s, 3H), 2.29–2.18 (m, 1H), 1.66–1.56 (m, 1H), 1.54–1.42 (m, 1H), 1.35–1.19 (m, 8H), 0.91 (t,  $J = 7.3$  Hz, 3H).  $^{13}\text{C}$  NMR (100 MHz,  $\text{CDCl}_3$ ):  $\delta = 156.3$  ( $\text{C}_q$ ), 137.9 ( $\text{C}_q$ ), 137.8 ( $\text{C}_q$ ), 134.8 (CH), 133.3 (CH), 128.6 (CH), 127.7 (CH), 83.6 ( $\text{C}_q$ ), 73.6 ( $\text{C}_q$ ), 44.2 ( $\text{CH}_2$ ), 34.5 ( $\text{CH}_2$ ), 32.0 ( $\text{CH}_2$ ), 22.4 ( $\text{CH}_2$ ), 21.4 ( $\text{CH}_3$ ), 21.3 ( $\text{CH}_3$ ), 13.8 ( $\text{CH}_3$ ), 13.1 ( $\text{CH}_3$ ).  $^{11}\text{B}$  NMR (128 MHz,  $\text{CDCl}_3$ ):  $\delta = 2.34$  (2B), -1.13 (2B), -2.77 (1B), -7.74 (1B), -10.36 (2B), -12.42 (1B), -13.91 (1B). IR (ATR): 2951, 2867, 2568, 1647, 1419, 1265, 809  $\text{cm}^{-1}$ . MS (ESI)  $m/z$  (relative intensity): 480 (100)  $[\text{M}+\text{H}]^+$ , 502 (20)  $[\text{M}+\text{Na}]^+$ . HR-MS (ESI):  $m/z$  calcd. for  $\text{C}_{25}\text{H}_{42}^{10}\text{B}_2^{11}\text{B}_8\text{NO}$   $[\text{M}+\text{H}]^+$ : 480.4276, found: 480.4272.

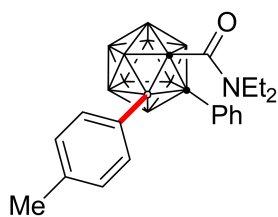

**4aa.** The representative procedure **B** was followed using *o*-carborane **1a** (1-CONEt<sub>2</sub>-2-Ph-*o*-C<sub>2</sub>B<sub>10</sub>H<sub>10</sub>) (64 mg, 0.20 mmol) and 4-iodotoluene **2a** (53 mg, 0.24 mmol). Isolation by column chromatography (*n*-hexane/EtOAc: 20/1) yielded **4aa** (45 mg, 55%) as a colorless solid. **M.p.** = 180–181 °C. **<sup>1</sup>H NMR** (400 MHz, CDCl<sub>3</sub>): δ = 7.45–7.39 (m, 4H), 7.28–7.22 (m, 1H), 7.16–7.05 (m, 4H), 3.55–3.35 (m, 4H), 2.34 (s, 3H), 1.00 (t, *J* = 7.1 Hz, 6H). **<sup>13</sup>C NMR** (100 MHz, CDCl<sub>3</sub>): δ = 158.3 (C<sub>q</sub>), 139.1 (C<sub>q</sub>), 134.6 (CH), 134.0 (C<sub>q</sub>), 131.9 (CH), 129.2 (CH), 128.5 (CH), 127.0 (CH), 89.5 (C<sub>q</sub>), 82.4 (C<sub>q</sub>), 43.6 (CH<sub>2</sub>), 21.3 (CH<sub>3</sub>), 12.2 (CH<sub>3</sub>). **<sup>11</sup>B NMR** (128 MHz, CDCl<sub>3</sub>): δ = -1.0 (1B), -2.26 (1B), -3.69 (1B), -7.91 (3B), -10.32 (4B). **IR** (ATR): 2635, 2563, 1648, 1476, 1418, 1269, 1208, 1080, 689 cm<sup>-1</sup>. **MS** (ESI) *m/z* (relative intensity): 432 (100) [M+Na]<sup>+</sup>, 410 (10) [M+H]<sup>+</sup>. **HR-MS** (ESI): *m/z* calcd. for C<sub>20</sub>H<sub>31</sub><sup>10</sup>B<sub>2</sub><sup>11</sup>B<sub>8</sub>NONa [M+Na]<sup>+</sup>: 432.3311, found: 432.3304.

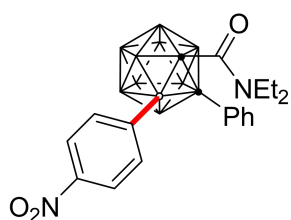

**4ah.** The representative procedure **B** was followed using *o*-carborane **1a** (1-CONEt<sub>2</sub>-2-Ph-*o*-C<sub>2</sub>B<sub>10</sub>H<sub>10</sub>) (64 mg, 0.20 mmol) and 1-iodo-4-nitrobenzene **2h** (60 mg, 0.24 mmol). Isolation by column chromatography (*n*-hexane/EtOAc: 20/1) yielded **4ah** (54 mg, 61%) as a colorless solid. **M.p.** = 147–148 °C. **<sup>1</sup>H NMR** (300 MHz, CDCl<sub>3</sub>): δ = 8.14 (d, *J* = 8.7 Hz, 2H), 7.78 (d, *J* = 8.7 Hz, 2H), 7.41–7.30 (m, 3H), 7.22–7.16 (m, 2H), 3.43–3.32 (m, 4H), 1.03 (t, *J* = 7.0 Hz, 6H). **<sup>13</sup>C NMR** (75 MHz, CDCl<sub>3</sub>): δ = 158.0 (C<sub>q</sub>), 148.3 (C<sub>q</sub>), 135.5 (CH), 133.5 (C<sub>q</sub>), 131.4 (CH), 129.8 (CH), 127.6 (CH), 122.3 (CH), 90.8 (C<sub>q</sub>), 83.0 (C<sub>q</sub>), 43.7 (CH<sub>2</sub>), 14.0 (CH<sub>3</sub>). **<sup>11</sup>B NMR** (96 MHz, CDCl<sub>3</sub>): δ = -0.10 (2B), -3.09 (2B), -7.61 (3B), -8.98 (2B), -10.71 (1B). **IR** (ATR): 2980, 2561, 1647, 1513, 1346, 1265, 1208, 843, 687 cm<sup>-1</sup>. **MS** (ESI) *m/z* (relative intensity): 463 (100) [M+Na]<sup>+</sup>, 441 (10) [M+H]<sup>+</sup>. **HR-MS** (ESI): *m/z* calcd. for C<sub>19</sub>H<sub>28</sub><sup>10</sup>B<sub>2</sub><sup>11</sup>B<sub>8</sub>N<sub>2</sub>O<sub>3</sub>Na [M+Na]<sup>+</sup>: 463.3005, found: 463.2995.

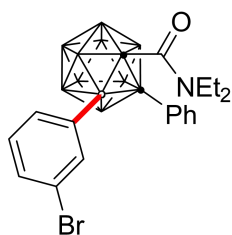

**4ai.** The representative procedure **B** was followed using *o*-carborane **1a** (1-CONEt<sub>2</sub>-2-Ph-*o*-C<sub>2</sub>B<sub>10</sub>H<sub>10</sub>) (64 mg, 0.20 mmol) and 1-iodo-3-bromobenzene **2i** (60 mg, 0.24 mmol). Isolation by column chromatography (*n*-hexane/EtOAc: 20/1) yielded **4ai** (47.3 mg, 50%) as a colorless solid. **M.p.** = 168–169 °C. **<sup>1</sup>H NMR** (400 MHz, CDCl<sub>3</sub>): δ = 7.66–7.61 (m, 1H), 7.52–7.45 (m, 2H), 7.40–7.35 (m, 2H), 7.31–7.23 (m, 1H), 7.17–7.09 (m, 3H), 3.36–3.10 (m, 4H), 1.01 (t, *J* = 7.2 Hz, 6H). **<sup>13</sup>C NMR** (100 MHz, CDCl<sub>3</sub>): δ = 158.0 (C<sub>q</sub>), 137.1 (CH), 133.8 (C<sub>q</sub>), 133.2 (CH), 132.3 (CH), 131.8 (CH), 129.5 (CH), 129.4 (CH), 127.3 (CH), 122.5 (C<sub>q</sub>), 90.5 (C<sub>q</sub>), 82.8 (C<sub>q</sub>), 44.1 (CH<sub>2</sub>), 43.7 (CH<sub>2</sub>), 14.0 (CH<sub>3</sub>), 12.2 (CH<sub>3</sub>). **<sup>11</sup>B NMR** (128 MHz, CDCl<sub>3</sub>): δ = -0.49 (2B), -3.35 (2B), -7.81 (3B), -9.66 (3B). **IR** (ATR): 2976, 2575, 1645, 1420, 1266, 1156, 770, 689 cm<sup>-1</sup>. **MS** (ESI) *m/z* (relative intensity): 497 (100) [M+Na]<sup>+</sup>, 475 (20) [M+H]<sup>+</sup>. **HR-MS** (ESI) *m/z* calcd for C<sub>19</sub>H<sub>28</sub><sup>10</sup>B<sub>1</sub><sup>11</sup>B<sub>9</sub><sup>79</sup>BrNONa [M+Na]<sup>+</sup>: 497.2220, found 497.2229.

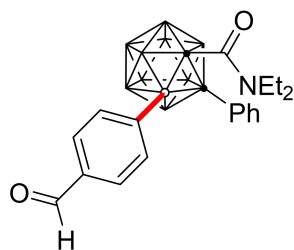

**4aj.** The representative procedure **B** was followed using *o*-carborane **1a** (1-CONEt<sub>2</sub>-2-Ph-*o*-C<sub>2</sub>B<sub>10</sub>H<sub>10</sub>) (64 mg, 0.20 mmol) and 4-iodobenzaldehyde **2j** (56 mg, 0.24 mmol). Isolation by column chromatography (*n*-hexane/EtOAc: 20/1) yielded **4aj** (43 mg, 51%) as a colorless solid. **M.p.** = 211–212 °C. **<sup>1</sup>H NMR** (300 MHz, CDCl<sub>3</sub>): δ = 10.07 (s, 1H), 7.88–7.70 (m, 4H), 7.44–7.37 (m, 2H), 7.35–7.29 (m, 1H), 7.20–7.11 (m, 2H), 3.43–3.30 (m, 4H), 1.03 (t, *J* = 7.0 Hz, 6H). **<sup>13</sup>C NMR** (75 MHz, CDCl<sub>3</sub>): δ = 192.3 (CH), 158.0 (C<sub>q</sub>), 136.3 (C<sub>q</sub>), 135.3 (CH), 133.7 (C<sub>q</sub>), 131.8 (CH), 129.7 (CH), 128.5 (CH), 127.2 (CH), 90.8 (C<sub>q</sub>), 83.0 (C<sub>q</sub>), 43.7 (CH<sub>2</sub>), 13.2 (CH<sub>3</sub>). **<sup>11</sup>B NMR** (96 MHz, CDCl<sub>3</sub>): δ = -0.28 (2B), -3.35 (2B), -7.51 (3B), -9.39 (2B), -11.02 (1B). **IR** (ATR): 2980, 2560, 1719, 1650, 1627, 1420, 1266, 1181, 761, 688 cm<sup>-1</sup>. **MS** (ESI) *m/z* (relative intensity): 424 (100) [M+H]<sup>+</sup>. **HR-MS** (ESI): *m/z* calcd. for C<sub>20</sub>H<sub>30</sub><sup>10</sup>B<sub>2</sub><sup>11</sup>B<sub>8</sub>NO<sub>2</sub> [M+H]<sup>+</sup>: 424.3284, found: 424.3266.



## Attempts with Other Groups

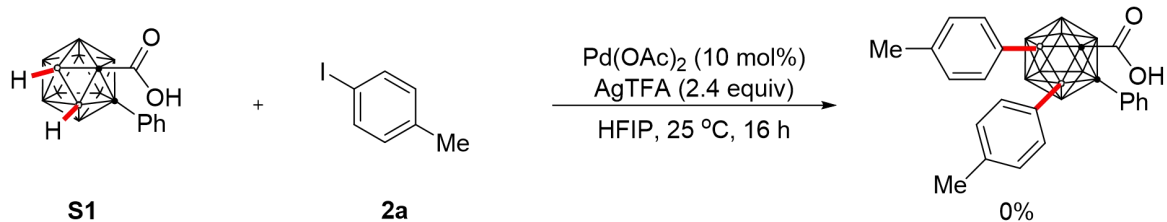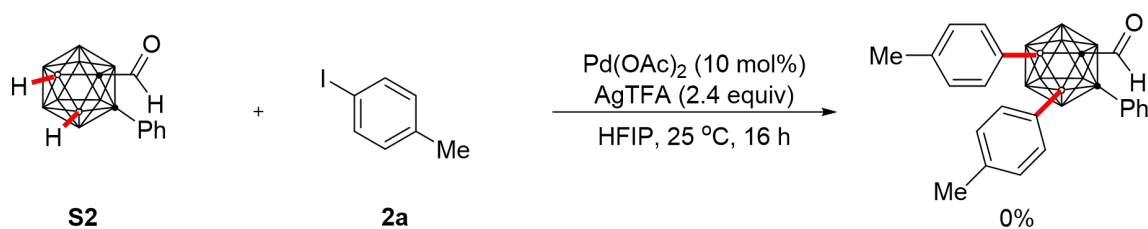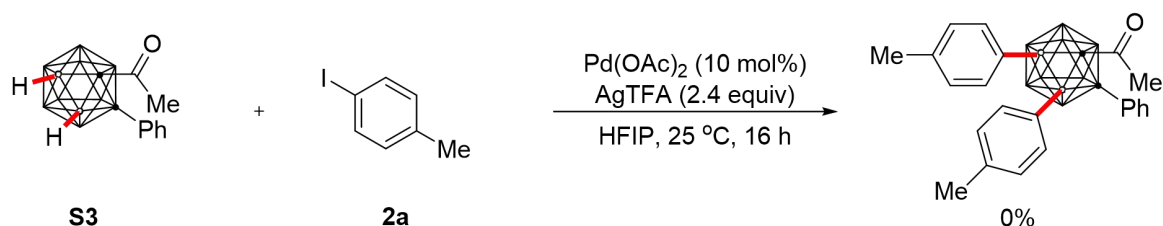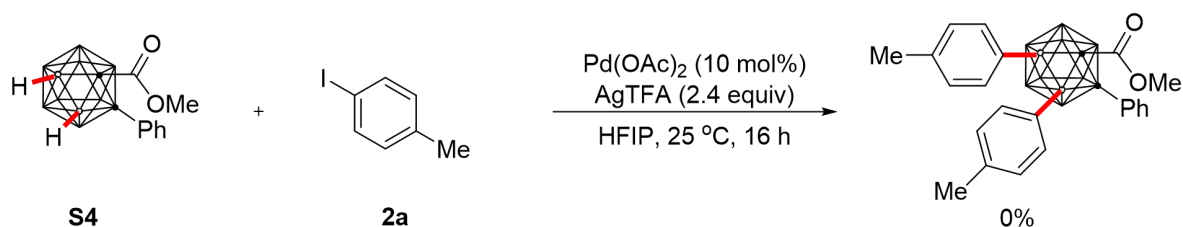

**> 95% carborane starting materials were recovered in all examples!**

*o*-Carborane **S1-S4** (0.20 mmol), 4-iodotoluene **2a** (105 mg, 0.48 mmol), Pd(OAc)<sub>2</sub> (4.5 mg, 10 mol %), AgTFA (106 mg, 0.48 mmol), and HFIP (0.50 mL) were placed in a 25 mL Schlenk tube under N<sub>2</sub> atmosphere. The mixture was stirred at 25 °C for 16 h.

## Mechanistic Studies

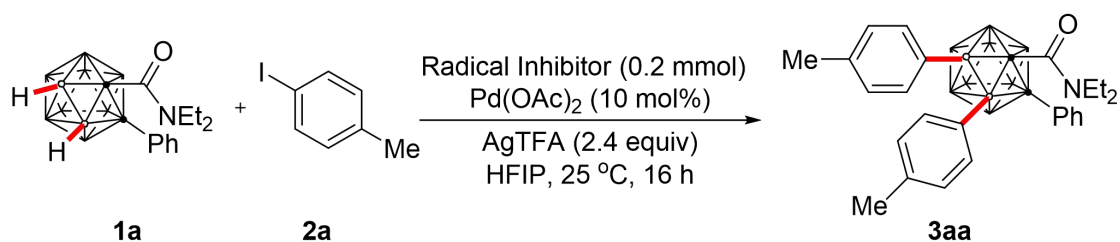

| Radical Inhibitor  | Yield of <b>3aa</b> |
|--------------------|---------------------|
| TEMPO              | 27%                 |
| 1,4-Cyclohexadiene | 52%                 |

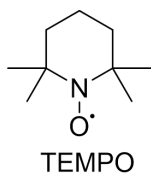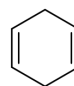

1,4-Cyclohexadiene

*o*-Carborane **1a** (1-CONEt<sub>2</sub>-2-Ph-*o*-C<sub>2</sub>B<sub>10</sub>H<sub>10</sub>) (64 mg, 0.20 mmol), 4-iodotoluene **2a** (105 mg, 0.48 mmol), TEMPO (31 mg, 0.20 mmol), Pd(OAc)<sub>2</sub> (4.5 mg, 10 mol %), AgTFA (106 mg, 0.48 mmol), and HFIP (0.50 mL) were placed in a 25 mL Schlenk tube under N<sub>2</sub> atmosphere. The mixture was stirred at 25 °C for 16 h. Then, the reaction solution was concentrated to dryness in vacuum and purified by column chromatography on silica gel using a mixture of *n*-hexane and EtOAc (20/1 in v/v) to afford the desired product **3aa** (27 mg, 27%).

*o*-Carborane **1a** (1-CONEt<sub>2</sub>-2-Ph-*o*-C<sub>2</sub>B<sub>10</sub>H<sub>10</sub>) (64 mg, 0.20 mmol), 4-iodotoluene **2a** (105 mg, 0.48 mmol), 1,4-cyclohexadiene (16 mg, 0.20 mmol), Pd(OAc)<sub>2</sub> (4.5 mg, 10 mol %), AgTFA (106 mg, 0.48 mmol), and HFIP (0.50 mL) were placed in a 25 mL Schlenk tube under N<sub>2</sub> atmosphere. The mixture was stirred at 25 °C for 16 h. Then, the reaction solution was concentrated to dryness in vacuum and purified by column chromatography on silica gel using a mixture of *n*-hexane and EtOAc (20/1 in v/v) to afford the desired product **3aa** (52 mg, 52%).

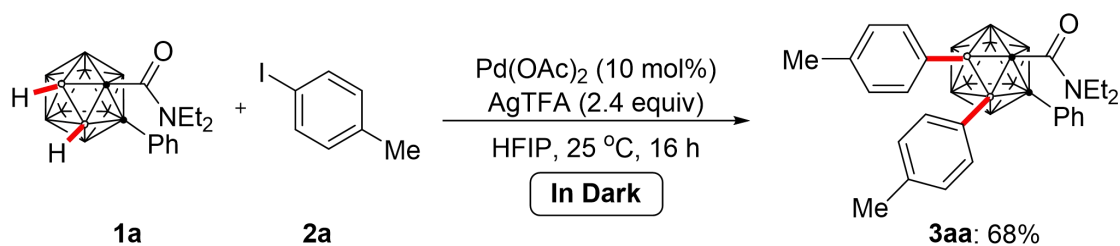

*o*-Carborane **1a** (1-CONEt<sub>2</sub>-2-Ph-*o*-C<sub>2</sub>B<sub>10</sub>H<sub>10</sub>) (64 mg, 0.20 mmol), 4-iodotoluene **2a** (105 mg, 0.48 mmol), Pd(OAc)<sub>2</sub> (4.5 mg, 10 mol %), AgTFA (106 mg, 0.48 mmol), and HFIP (0.50 mL) were placed in a 25 mL Schlenk tube under N<sub>2</sub> atmosphere. The mixture was stirred at 25 °C for 16 h in dark. Then, the reaction solution was concentrated to dryness in vacuum and purified by column chromatography on silica gel using a mixture of *n*-hexane and EtOAc (20/1 in v/v) to afford the desired product **3aa** (68 mg, 68%).

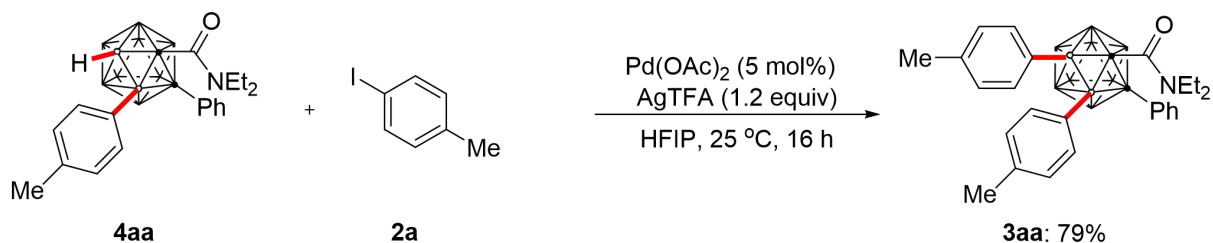

Compound **4aa** (86 mg, 0.20 mmol), 4-iodotoluene **2a** (53 mg, 0.24 mmol), Pd(OAc)<sub>2</sub> (2.3 mg, 5 mol %), AgTFA (53 mg, 0.24 mmol), and HFIP (0.50 mL) were placed in a 25 mL Schlenk tube under N<sub>2</sub> atmosphere. The mixture was stirred at 25 °C for 16 h. Then, the reaction solution was concentrated to dryness in vacuum and purified by column chromatography on silica gel using a mixture of *n*-hexane and EtOAc (20/1 in v/v) to afford the desired product **3aa** (79 mg, 79%).

## Computational Data

All calculations were carried out with the Gaussian 16, Revision A.03 package.<sup>[5]</sup> Geometry optimizations of all stationary points were performed at the TPSS<sup>[6]</sup> level of theory including D3(BJ)<sup>[7]</sup> dispersion corrections. All atoms were described with a def2-SVP<sup>[8]</sup> basis set. For palladium, the Stuttgart-Dresden effective core potentials was employed.<sup>[9]</sup> All stationary points were fully characterized by analytical frequency calculations as either a minimum (no imaginary frequency) or a transition state (only one imaginary frequency) at the same level of theory.

Single point calculations were performed at the PW6B95<sup>[10]</sup> level of theory including D3(BJ) dispersion corrections with a def2-TZVP<sup>[8]</sup> basis set for all atoms. For palladium, the same pseudopotential as in the optimization was used. Solvent effects were taken into consideration in the single point calculations through the use of SMD<sup>[11]</sup> model with a dielectric constant of  $\epsilon = 16.7$ , which corresponds to HFIP (Hexafluoro-propan-2-ol).

Unless otherwise stated, all reported energies are Gibbs free energies in kcal mol<sup>-1</sup>, which were calculated by adding the gas-phase thermal correction to Gibbs free energy at 298.15 K to the single-point energies.

The 3D structures of optimized geometries were constructed by using the CYLview software.<sup>[12]</sup>

**Scheme S1.** Relative Gibbs free energies in kcal mol<sup>-1</sup> for various Pd(II) cyclometalated complexes at the B4 and B6 position generated after a second B–H activation at the PBE0-D3(BJ)/def2-TZVP+SMD(HFIP)//TPSS-D3(BJ)/def2-SVP level of theory.

a) Cationic palladacyclic intermediates with AgTFA as a ligand

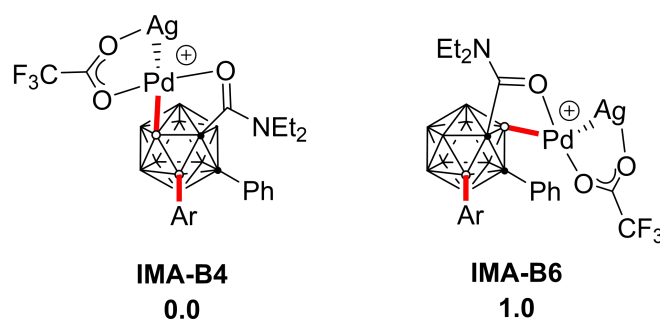

b) Cationic palladacyclic intermediates with HFIP as a ligand

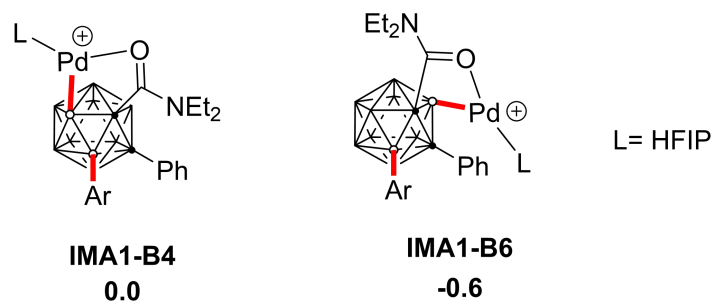

c) Cationic palladacyclic intermediates without any ligand

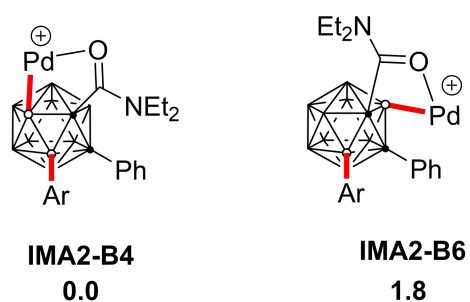

d) Neutral palladacyclic intermediates with TFA as a ligand

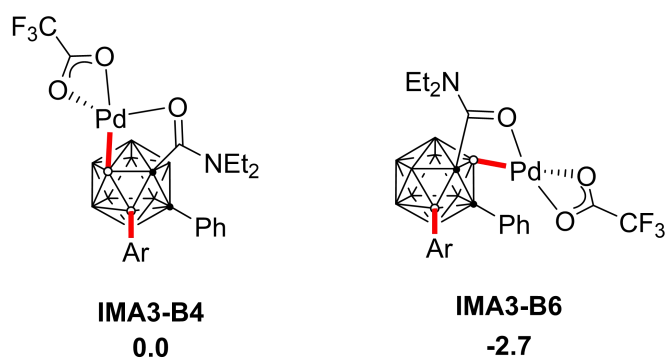

**Scheme S2.** Relative Gibbs free energies in kcal mol<sup>-1</sup> for various Pd(IV) intermediates at the B4 and B6 position generated after a second oxidative addition at the PBE0-D3(BJ)/def2-TZVP+SMD(HFIP)//TPSS-D3(BJ)/def2-SVP level of theory.

a) Cationic Pd(IV) intermediates with AgTFA as a ligand

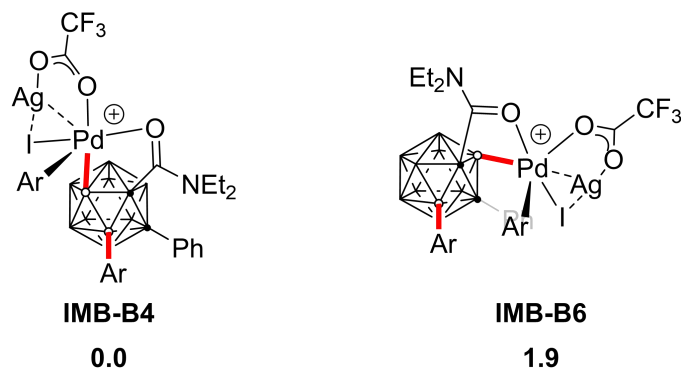

b) Cationic Pd(IV) intermediates with HFIP as a ligand

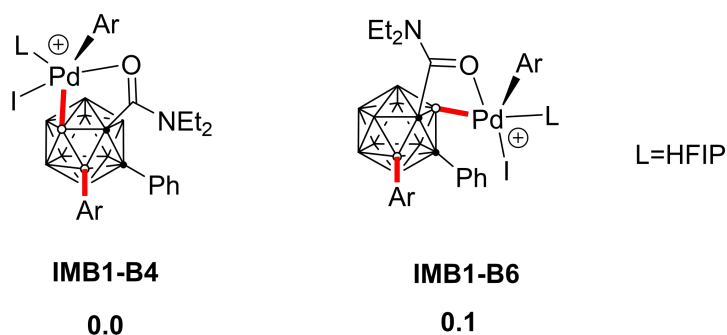

c) Cationic Pd(IV) intermediates without any ligand

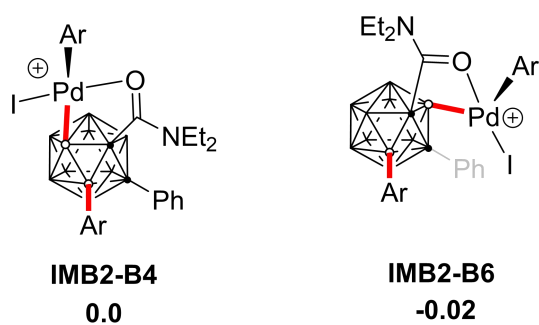

d) Neutral Pd(IV) intermediates with TFA as a ligand

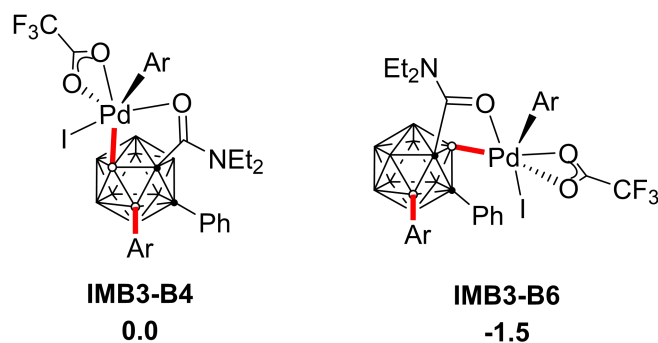

**Scheme S3.** Relative Gibbs free energies in kcal mol<sup>-1</sup> for the first and second B–H activation transition states of neutral Pd(II) complexes at the B3 vs B4 and B4 vs B6 position, respectively, at the PBE0-D3(BJ)/def2-TZVP+SMD(HFIP)//TPSS-D3(BJ)/def2-SVP level of theory.

a) First B–H activation transition states at the B3 and B4 position

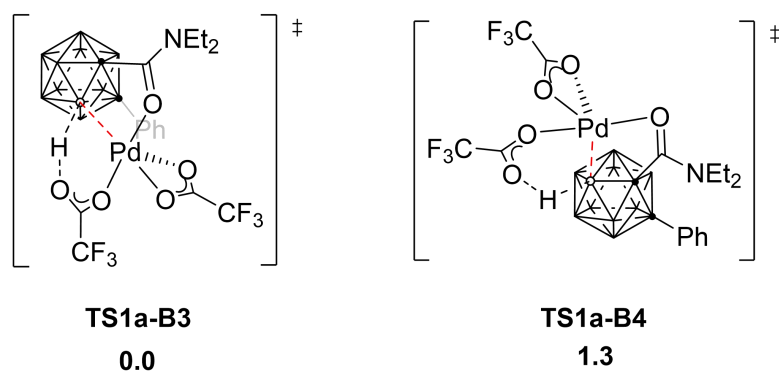

b) Second B–H activation transition states at the B4 and B6 position

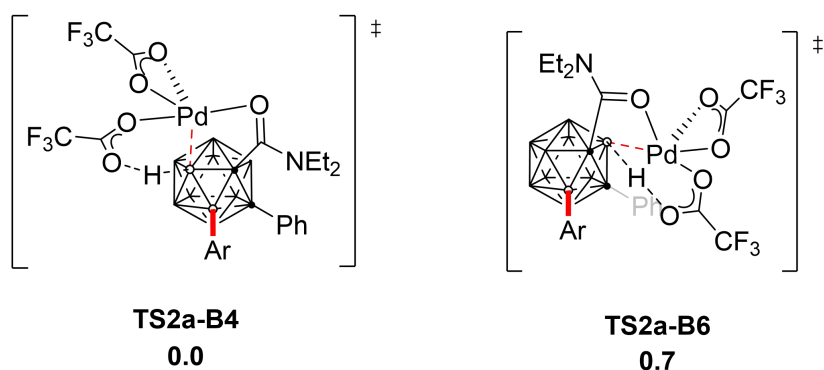

**Scheme S4.** Relative Gibbs free energies in kcal mol<sup>-1</sup> for various second oxidative addition transition states at the B4 and B6 position at the PBE0-D3(BJ)/def2-TZVP+SMD(HFIP)//TPSS-D3(BJ)/def2-SVP level of theory.

- a) Oxidative addition transition states to the cationic palladacyclic intermediate with AgTFA as a ligand.

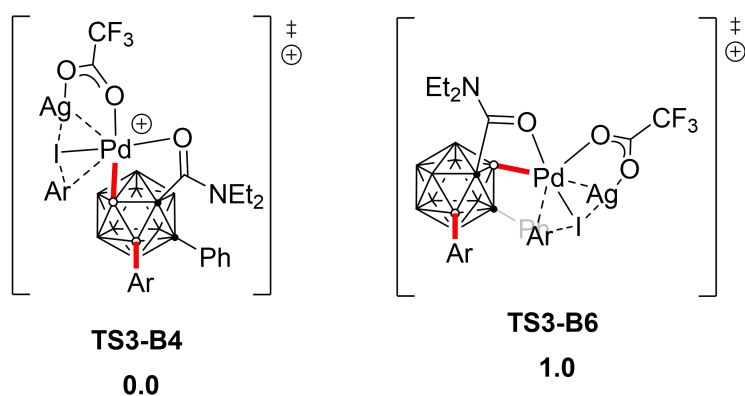

- b) Oxidative addition transition states to the cationic palladacyclic intermediate without any ligand.

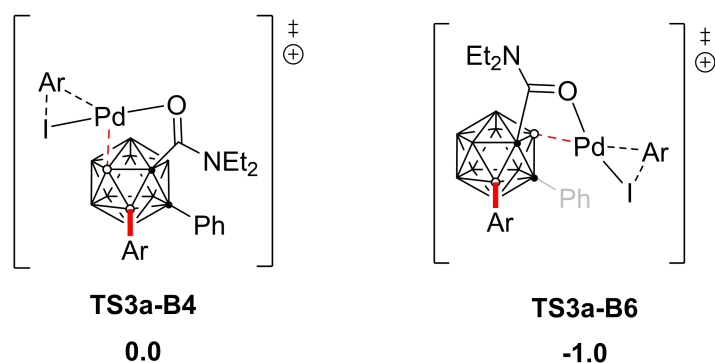

- c) Oxidative addition transition states to the neutral palladacyclic intermediate with TFA as a ligand.

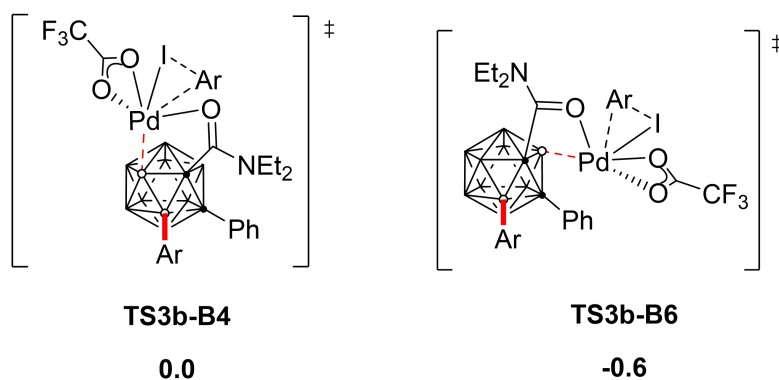



**Table S2.** Calculated electronic energies at the PBE0-D3(BJ)/def2-TZVP+SMD(HFIP) level of theory and total Gibbs free energies for all reported structures (in Hartree).

| <b>Structure</b> | <b>Electronic Energy</b> | <b>Total Gibbs Free Energy</b> |
|------------------|--------------------------|--------------------------------|
| <b>IMA-B6</b>    | -1958.72738              | -1958.28092                    |
| <b>IMA-B4</b>    | -1958.73032              | -1958.28255                    |
| <b>IMA1-B6</b>   | -2075.15553              | -2074.67689                    |
| <b>IMA1-B4</b>   | -2075.15294              | -2074.67593                    |
| <b>IMA2-B6</b>   | -1285.71571              | -1285.28436                    |
| <b>IMA2-B4</b>   | -1285.71878              | -1285.28720                    |
| <b>IMA3-B6</b>   | -1811.84673              | -1811.39893                    |
| <b>IMA3-B4</b>   | -1811.84314              | -1811.39462                    |
| <b>IMB-B6</b>    | -2240.83080              | -2240.28129                    |
| <b>IMB-B4</b>    | -2240.83569              | -2240.28436                    |
| <b>IMB1-B6</b>   | -2357.26437              | -2356.68199                    |
| <b>IMB1-B4</b>   | -2357.26806              | -2356.68209                    |
| <b>IMB2-B6</b>   | -1567.84397              | -1567.30874                    |
| <b>IMB2-B4</b>   | -1567.84474              | -1567.30870                    |
| <b>IMB3-B6</b>   | -2093.94339              | -2093.38933                    |
| <b>IMB3-B4</b>   | -2093.94276              | -2093.38689                    |
| <b>TS1-B3</b>    | -2215.06249              | -2214.68844                    |
| <b>TS1-B4</b>    | -2215.05063              | -2214.67925                    |
| <b>TS1a-B3</b>   | -2068.18141              | -2067.80638                    |
| <b>TS1a-B4</b>   | -2068.17822              | -2067.80425                    |
| <b>TS2-B6</b>    | -2485.22152              | -2484.75264                    |
| <b>TS2-B4</b>    | -2485.22716              | -2484.75800                    |
| <b>TS2a-B6</b>   | -2338.34253              | -2337.86967                    |
| <b>TS2a-B4</b>   | -2338.34461              | -2337.87077                    |
| <b>TS3-B6</b>    | -2240.81864              | -2240.26843                    |
| <b>TS3-B4</b>    | -2240.82092              | -2240.26999                    |
| <b>TS3a-B6</b>   | -1567.83254              | -1567.29860                    |

|                |             |             |
|----------------|-------------|-------------|
| <b>TS3a-B4</b> | -1567.83447 | -1567.29706 |
| <b>TS3b-B6</b> | -2093.92642 | -2093.37574 |
| <b>TS3b-B4</b> | -2093.92805 | -2093.37477 |

### Cartesian coordinates of the optimized structures

#### IMA-B6

Lowest frequency = 8.77 cm<sup>-1</sup>

Charge = 1, Multiplicity = 1

71

|   |           |           |           |
|---|-----------|-----------|-----------|
| O | -0.320984 | 1.990162  | 0.899212  |
| N | -2.080945 | 2.887741  | -0.152742 |
| C | -1.307988 | 1.832008  | 0.096827  |
| C | -1.437729 | 0.456173  | -0.540653 |
| C | -1.543458 | -0.861790 | 0.467729  |
| C | -1.827883 | -0.684555 | 1.939649  |
| C | -2.391576 | 0.478763  | 2.485662  |
| H | -2.726303 | 1.287611  | 1.836353  |
| C | -2.575226 | 0.610763  | 3.870760  |
| H | -3.012641 | 1.533149  | 4.264384  |
| C | -2.209692 | -0.419428 | 4.744560  |
| H | -2.343394 | -0.306628 | 5.824126  |
| C | -1.717806 | -1.627337 | 4.217267  |
| H | -1.528462 | -2.483321 | 4.872853  |
| C | -1.539278 | -1.773146 | 2.818622  |
| H | -1.322739 | -2.762148 | 2.401868  |
| C | -1.713693 | 4.173685  | 0.501075  |
| H | -2.142080 | 4.968267  | -0.127741 |
| H | -0.617437 | 4.263583  | 0.476351  |
| C | -2.238830 | 4.265589  | 1.935178  |
| H | -2.006468 | 5.262549  | 2.344558  |
| H | -1.758478 | 3.510973  | 2.578455  |
| H | -3.333630 | 4.130049  | 1.970287  |
| C | -3.281347 | 2.918148  | -1.011008 |
| H | -4.066487 | 3.434089  | -0.431730 |
| H | -3.625403 | 1.890007  | -1.153607 |
| C | -3.034798 | 3.619228  | -2.347237 |
| H | -2.241235 | 3.112955  | -2.920157 |
| H | -2.752019 | 4.676974  | -2.215897 |
| H | -3.963697 | 3.591085  | -2.940424 |
| B | -2.864526 | -0.625279 | -0.683539 |
| B | -2.407038 | -1.673413 | -2.045121 |
| H | -3.298833 | -2.116950 | -2.706049 |
| B | -1.989862 | 0.049861  | -2.102332 |
| H | -2.530184 | 0.885857  | -2.755360 |
| B | -0.836852 | -1.163381 | -2.720412 |
| H | -0.595062 | -1.222783 | -3.889473 |
| B | 0.423334  | -1.424978 | -1.473828 |
| H | 1.568228  | -1.678948 | -1.702059 |
| B | -0.397054 | -2.073039 | -0.030932 |
| H | 0.113710  | -2.745057 | 0.816751  |
| B | -2.128117 | -2.228955 | -0.378893 |

|    |           |           |           |
|----|-----------|-----------|-----------|
| H  | -2.800850 | -2.985927 | 0.254530  |
| B  | -0.923959 | -2.585514 | -1.647914 |
| H  | -0.754585 | -3.710950 | -2.012945 |
| B  | 0.061858  | -0.382380 | -0.113032 |
| B  | -0.243669 | 0.207941  | -1.759903 |
| H  | 0.336513  | 1.188303  | -2.121687 |
| Pd | 1.244654  | 0.725481  | 1.025143  |
| O  | 2.798899  | -1.601076 | 2.868063  |
| C  | 3.379887  | -1.170266 | 1.845749  |
| O  | 2.956671  | -0.341651 | 0.975267  |
| C  | 4.794304  | -1.729671 | 1.529432  |
| F  | 4.683178  | -2.612207 | 0.515314  |
| F  | 5.315193  | -2.353325 | 2.590049  |
| F  | 5.619807  | -0.740717 | 1.154027  |
| C  | -4.348518 | -0.310418 | -0.288929 |
| C  | -5.217496 | 0.200050  | -1.284551 |
| C  | -4.932250 | -0.657892 | 0.948994  |
| C  | -6.576026 | 0.410170  | -1.035227 |
| H  | -4.825521 | 0.420193  | -2.283959 |
| C  | -6.293293 | -0.447251 | 1.199542  |
| H  | -4.329064 | -1.124809 | 1.731715  |
| C  | -7.141934 | 0.100068  | 0.218669  |
| H  | -7.214494 | 0.806456  | -1.832664 |
| H  | -6.709320 | -0.728201 | 2.173445  |
| C  | -8.615418 | 0.299472  | 0.475949  |
| H  | -9.201463 | -0.510973 | 0.003582  |
| H  | -8.843023 | 0.292077  | 1.554007  |
| H  | -8.972638 | 1.250872  | 0.046505  |
| Ag | 0.672513  | -1.228754 | 3.020507  |

### IMA-B4

Lowest frequency = 13.92 cm<sup>-1</sup>

Charge = 1, Multiplicity = 1

71

|   |           |           |           |
|---|-----------|-----------|-----------|
| O | -0.591613 | 2.137574  | -0.544123 |
| N | -2.809693 | 2.504689  | -0.507127 |
| C | -1.730797 | 1.895952  | -0.011280 |
| C | -1.665147 | 0.960055  | 1.184690  |
| C | -2.651634 | -0.326844 | 1.600219  |
| C | -3.886425 | -0.631729 | 0.788146  |
| C | -3.870029 | -0.613416 | -0.621206 |
| H | -2.956246 | -0.370489 | -1.163817 |
| C | -5.033303 | -0.887835 | -1.349134 |
| H | -4.999438 | -0.868318 | -2.443010 |
| C | -6.229657 | -1.190165 | -0.683655 |
| H | -7.137907 | -1.408876 | -1.253555 |
| C | -6.253549 | -1.210465 | 0.717610  |
| H | -7.180676 | -1.444179 | 1.249677  |
| C | -5.093220 | -0.931473 | 1.450361  |
| H | -5.125975 | -0.945762 | 2.541130  |
| C | -2.620817 | 3.332037  | -1.730294 |
| H | -1.644583 | 3.832511  | -1.658992 |
| H | -3.406998 | 4.101390  | -1.709290 |
| C | -2.719964 | 2.482517  | -2.998809 |
| H | -2.622618 | 3.131168  | -3.884934 |
| H | -3.692278 | 1.964196  | -3.057356 |

|    |           |           |           |
|----|-----------|-----------|-----------|
| H  | -1.915656 | 1.729741  | -3.034073 |
| C  | -4.177897 | 2.518049  | 0.055214  |
| H  | -4.305021 | 1.647647  | 0.705126  |
| H  | -4.866078 | 2.378785  | -0.795034 |
| C  | -4.476322 | 3.814804  | 0.809953  |
| H  | -4.392424 | 4.702267  | 0.161014  |
| H  | -3.790801 | 3.941792  | 1.663970  |
| H  | -5.508438 | 3.774527  | 1.195584  |
| B  | -1.072417 | -0.676911 | 0.873972  |
| B  | -0.004487 | -1.010775 | 2.267305  |
| H  | 0.903646  | -1.773941 | 2.096179  |
| B  | -0.010242 | 0.599202  | 1.548377  |
| B  | 0.089923  | 0.445210  | 3.307145  |
| H  | 1.090571  | 0.748211  | 3.885656  |
| B  | -1.552961 | 0.761917  | 3.953558  |
| H  | -1.766512 | 1.282794  | 5.007614  |
| B  | -2.631974 | -0.501684 | 3.317243  |
| H  | -3.619321 | -0.893362 | 3.854620  |
| B  | -1.689301 | -1.579617 | 2.282631  |
| H  | -2.075964 | -2.691722 | 2.099489  |
| B  | -0.961937 | -0.916453 | 3.768624  |
| H  | -0.749808 | -1.631767 | 4.702200  |
| B  | -2.635420 | 1.110764  | 2.602375  |
| H  | -3.588229 | 1.817249  | 2.579164  |
| B  | -0.950093 | 1.698967  | 2.575562  |
| H  | -0.781230 | 2.879782  | 2.501685  |
| Pd | 1.190667  | 1.582362  | 0.299707  |
| O  | 2.928975  | 1.150513  | 1.227368  |
| C  | 3.574764  | 0.051800  | 1.202072  |
| O  | 3.352554  | -0.985644 | 0.535991  |
| C  | 4.760265  | 0.015497  | 2.203569  |
| F  | 5.610389  | -0.975006 | 1.916242  |
| F  | 4.251413  | -0.193059 | 3.438579  |
| F  | 5.427391  | 1.178582  | 2.204191  |
| Ag | 1.502537  | -1.086161 | -0.579578 |
| C  | -0.910612 | -1.399285 | -0.539584 |
| C  | -1.195552 | -2.789099 | -0.633681 |
| C  | -0.473376 | -0.761574 | -1.750298 |
| C  | -1.079978 | -3.487331 | -1.837613 |
| H  | -1.525355 | -3.326000 | 0.258277  |
| C  | -0.345113 | -1.486986 | -2.958119 |
| H  | -0.352336 | 0.325703  | -1.782023 |
| C  | -0.645392 | -2.857979 | -3.025330 |
| H  | -1.325114 | -4.554764 | -1.855783 |
| H  | -0.024305 | -0.955124 | -3.860241 |
| C  | -0.493618 | -3.638137 | -4.306309 |
| H  | 0.399767  | -4.287903 | -4.256430 |
| H  | -1.363152 | -4.295624 | -4.475644 |
| H  | -0.379045 | -2.972333 | -5.176122 |

#### IMA1-B6

Lowest frequency = 6.86 cm<sup>-1</sup>

Charge = 1, Multiplicity = 1

75

|   |           |          |           |
|---|-----------|----------|-----------|
| O | -0.056387 | 2.227031 | -0.276009 |
| N | -2.161580 | 2.720750 | -0.855498 |

|    |           |           |           |
|----|-----------|-----------|-----------|
| C  | -1.169675 | 1.835831  | -0.778445 |
| C  | -1.201909 | 0.412282  | -1.318990 |
| C  | -0.791469 | -0.810332 | -0.247958 |
| C  | -0.725266 | -0.479812 | 1.223720  |
| C  | -1.568506 | 0.491772  | 1.795405  |
| H  | -2.324156 | 0.994052  | 1.188516  |
| C  | -1.486580 | 0.793104  | 3.158740  |
| H  | -2.152950 | 1.550004  | 3.583593  |
| C  | -0.571315 | 0.116618  | 3.976980  |
| H  | -0.510038 | 0.349037  | 5.044543  |
| C  | 0.253533  | -0.870139 | 3.420544  |
| H  | 0.964301  | -1.413803 | 4.050019  |
| C  | 0.179887  | -1.166602 | 2.054194  |
| H  | 0.828187  | -1.936674 | 1.634403  |
| C  | -1.896254 | 4.093366  | -0.348108 |
| H  | -2.607116 | 4.754165  | -0.866816 |
| H  | -0.876531 | 4.372968  | -0.652365 |
| C  | -2.060087 | 4.187445  | 1.170238  |
| H  | -1.903232 | 5.231121  | 1.489331  |
| H  | -1.321324 | 3.552075  | 1.683983  |
| H  | -3.074352 | 3.884364  | 1.482588  |
| C  | -3.524075 | 2.461406  | -1.356268 |
| H  | -4.218524 | 2.875952  | -0.605114 |
| H  | -3.685588 | 1.379390  | -1.363551 |
| C  | -3.775458 | 3.076199  | -2.733375 |
| H  | -3.077805 | 2.668159  | -3.482493 |
| H  | -3.673985 | 4.174297  | -2.721324 |
| H  | -4.804259 | 2.836884  | -3.049494 |
| B  | -2.370790 | -0.926523 | -1.035478 |
| B  | -2.063823 | -1.989853 | -2.426237 |
| H  | -2.980945 | -2.647003 | -2.821226 |
| B  | -2.029982 | -0.230806 | -2.661611 |
| H  | -2.873469 | 0.424776  | -3.188191 |
| B  | -0.843494 | -1.266975 | -3.506412 |
| H  | -0.884916 | -1.392231 | -4.694790 |
| B  | 0.703124  | -1.175017 | -2.610079 |
| H  | 1.788525  | -1.236612 | -3.116479 |
| B  | 0.406310  | -1.831080 | -0.977540 |
| H  | 1.243807  | -2.323634 | -0.280854 |
| B  | -1.285336 | -2.334844 | -0.861505 |
| H  | -1.616809 | -3.146521 | -0.051996 |
| B  | -0.379572 | -2.575815 | -2.383234 |
| H  | -0.078711 | -3.678364 | -2.735365 |
| B  | 0.456739  | -0.102001 | -1.250361 |
| B  | -0.322965 | 0.274172  | -2.796901 |
| H  | -0.046131 | 1.303441  | -3.337224 |
| Pd | 1.650008  | 1.167165  | -0.347200 |
| O  | 3.391574  | -0.032668 | -0.628611 |
| C  | -3.754977 | -0.882698 | -0.299178 |
| C  | -4.921716 | -0.576537 | -1.038149 |
| C  | -3.937799 | -1.327760 | 1.030172  |
| C  | -6.194329 | -0.644714 | -0.461572 |
| H  | -4.838527 | -0.305012 | -2.096658 |
| C  | -5.209928 | -1.398526 | 1.605803  |
| H  | -3.077475 | -1.645294 | 1.625370  |
| C  | -6.363974 | -1.043969 | 0.878523  |

|   |           |           |           |
|---|-----------|-----------|-----------|
| H | -7.074389 | -0.404711 | -1.068486 |
| H | -5.311532 | -1.752335 | 2.637864  |
| C | -7.731822 | -1.096417 | 1.514091  |
| H | -8.526940 | -1.174594 | 0.755025  |
| H | -7.820194 | -1.951409 | 2.205171  |
| H | -7.921331 | -0.178892 | 2.102930  |
| C | 4.505754  | 0.034649  | 0.263446  |
| H | 5.376282  | -0.478178 | -0.180865 |
| C | 4.171183  | -0.668260 | 1.597237  |
| C | 4.861471  | 1.528524  | 0.395376  |
| F | 3.740220  | 2.252826  | 0.721068  |
| F | 5.769066  | 1.720211  | 1.350338  |
| F | 5.317534  | 2.000273  | -0.766841 |
| F | 3.260409  | 0.014379  | 2.314284  |
| F | 5.267774  | -0.846165 | 2.334913  |
| F | 3.642791  | -1.883532 | 1.298466  |
| H | 3.168588  | -0.964914 | -0.838040 |

#### IMA1-B4

Lowest frequency = 3.90 cm<sup>-1</sup>

Charge = 1, Multiplicity = 1

75

|   |           |           |           |
|---|-----------|-----------|-----------|
| O | 0.072841  | 1.863033  | 0.141064  |
| N | 2.098988  | 2.553380  | -0.536011 |
| C | 1.127309  | 1.640952  | -0.553319 |
| C | 1.078885  | 0.357478  | -1.364302 |
| C | 2.228483  | -0.819740 | -1.598237 |
| C | 3.632245  | -0.623187 | -1.077544 |
| C | 4.727044  | -1.019752 | -1.870246 |
| H | 4.555879  | -1.465781 | -2.851407 |
| C | 6.037447  | -0.845623 | -1.407741 |
| H | 6.874926  | -1.162690 | -2.036539 |
| C | 6.274882  | -0.270977 | -0.151777 |
| H | 7.299765  | -0.137318 | 0.208005  |
| C | 5.189792  | 0.128898  | 0.640893  |
| H | 5.359576  | 0.574171  | 1.626250  |
| C | 3.878599  | -0.047797 | 0.186295  |
| H | 3.051724  | 0.265013  | 0.824782  |
| C | 1.947004  | 3.683056  | 0.422080  |
| H | 2.551437  | 4.511781  | 0.024076  |
| H | 0.891837  | 3.993037  | 0.422783  |
| C | 2.410373  | 3.283052  | 1.824528  |
| H | 2.301847  | 4.142160  | 2.507027  |
| H | 1.804456  | 2.449532  | 2.216082  |
| H | 3.470970  | 2.979064  | 1.820744  |
| C | 3.289059  | 2.613242  | -1.411364 |
| H | 4.139793  | 2.885175  | -0.765065 |
| H | 3.499319  | 1.611263  | -1.797390 |
| C | 3.107808  | 3.615407  | -2.552806 |
| H | 2.268152  | 3.322969  | -3.204974 |
| H | 2.921044  | 4.636746  | -2.181384 |
| H | 4.027889  | 3.638474  | -3.159935 |
| B | 1.700324  | 0.159519  | -2.957487 |
| B | 0.490886  | -0.799959 | -3.814599 |
| H | 0.369173  | -0.656268 | -4.994795 |
| B | -0.035589 | 0.453803  | -2.679204 |

|    |           |           |           |
|----|-----------|-----------|-----------|
| H  | -0.468633 | 1.541389  | -2.917699 |
| B  | -0.873782 | -1.118052 | -2.702928 |
| H  | -2.005433 | -1.189114 | -3.090733 |
| B  | -0.264732 | -2.097442 | -1.330658 |
| H  | -0.942317 | -2.877422 | -0.719023 |
| B  | 1.473391  | -2.370687 | -1.602704 |
| H  | 2.125923  | -3.283030 | -1.201457 |
| B  | 1.929666  | -1.582267 | -3.117361 |
| H  | 2.855205  | -1.980961 | -3.750670 |
| B  | 0.345577  | -2.380900 | -2.983632 |
| H  | 0.125047  | -3.395045 | -3.577221 |
| B  | 0.938982  | -1.162271 | -0.400860 |
| B  | -0.461612 | -0.361335 | -1.162290 |
| Pd | -1.583507 | 0.692324  | 0.077819  |
| H  | 2.454663  | 0.964267  | -3.395318 |
| C  | 1.269580  | -1.312914 | 1.128667  |
| C  | 2.183250  | -2.316055 | 1.535060  |
| C  | 0.695360  | -0.528164 | 2.152088  |
| C  | 2.510966  | -2.508234 | 2.878974  |
| H  | 2.659092  | -2.952678 | 0.784376  |
| C  | 1.024193  | -0.718618 | 3.499980  |
| H  | -0.029779 | 0.253093  | 1.896282  |
| C  | 1.941460  | -1.711041 | 3.892917  |
| H  | 3.225522  | -3.294006 | 3.148124  |
| H  | 0.555322  | -0.085323 | 4.261473  |
| C  | 2.281752  | -1.939254 | 5.345221  |
| H  | 1.996930  | -1.076404 | 5.968627  |
| H  | 1.744974  | -2.825381 | 5.732614  |
| H  | 3.360260  | -2.129874 | 5.478654  |
| O  | -3.189056 | -0.669554 | 0.040068  |
| C  | -4.201845 | -0.734206 | -0.978257 |
| H  | -3.798784 | -1.172582 | -1.907470 |
| C  | -5.324513 | -1.655771 | -0.456199 |
| C  | -4.645309 | 0.708284  | -1.287471 |
| F  | -6.149305 | -2.004816 | -1.445649 |
| F  | -6.023858 | -1.098217 | 0.538119  |
| F  | -4.722963 | -2.779413 | 0.024603  |
| F  | -5.800046 | 0.706312  | -1.959454 |
| F  | -4.784327 | 1.428010  | -0.158631 |
| F  | -3.705501 | 1.314788  | -2.049157 |
| H  | -2.875170 | -1.582913 | 0.216193  |

### IMA2-B6

Lowest frequency = 20.07 cm<sup>-1</sup>

Charge = 1, Multiplicity = 1

63

|   |           |           |           |
|---|-----------|-----------|-----------|
| O | -1.773162 | 0.901077  | 1.386865  |
| N | 0.269333  | 1.095375  | 2.288841  |
| C | -0.580739 | 0.450684  | 1.489718  |
| C | -0.292499 | -0.859741 | 0.763567  |
| C | -0.469629 | -0.891976 | -0.923892 |
| C | -0.779521 | 0.454821  | -1.541938 |
| C | -1.961042 | 0.596033  | -2.327363 |
| H | -2.494528 | -0.292468 | -2.677904 |
| C | -2.358052 | 1.867987  | -2.782677 |
| H | -3.252813 | 1.958871  | -3.406138 |

|    |           |           |           |
|----|-----------|-----------|-----------|
| C  | -1.601105 | 3.002543  | -2.457980 |
| H  | -1.910190 | 3.989893  | -2.813718 |
| C  | -0.436238 | 2.861960  | -1.689791 |
| H  | 0.165595  | 3.741539  | -1.441888 |
| C  | -0.032168 | 1.601390  | -1.226135 |
| H  | 0.867212  | 1.516109  | -0.612326 |
| C  | -0.238735 | 2.310336  | 2.981077  |
| H  | -1.270480 | 2.107321  | 3.304996  |
| H  | 0.387348  | 2.438190  | 3.876763  |
| C  | -0.178832 | 3.548182  | 2.084651  |
| H  | -0.520555 | 4.428386  | 2.653836  |
| H  | 0.851545  | 3.743211  | 1.740412  |
| H  | -0.833539 | 3.427238  | 1.207009  |
| C  | 1.674068  | 0.734979  | 2.554210  |
| H  | 2.003698  | 0.046846  | 1.771090  |
| H  | 2.264536  | 1.659086  | 2.427365  |
| C  | 1.884524  | 0.138846  | 3.946582  |
| H  | 1.619283  | 0.849397  | 4.747048  |
| H  | 1.287581  | -0.777730 | 4.080614  |
| H  | 2.949779  | -0.119135 | 4.066434  |
| B  | -1.814772 | -1.337709 | 0.061268  |
| B  | -1.886059 | -3.085727 | 0.135904  |
| H  | -2.935473 | -3.644568 | 0.262883  |
| B  | -1.154000 | -2.161184 | 1.484984  |
| H  | -1.625013 | -1.944223 | 2.561077  |
| B  | -0.347129 | -3.625540 | 0.883885  |
| H  | -0.284510 | -4.597436 | 1.576941  |
| B  | 0.997170  | -3.123226 | -0.182360 |
| H  | 2.019095  | -3.737135 | -0.269748 |
| B  | 0.311019  | -2.268004 | -1.585050 |
| H  | 0.797884  | -2.145310 | -2.667202 |
| B  | -1.446305 | -2.254403 | -1.385320 |
| H  | -2.157048 | -2.152128 | -2.337004 |
| B  | -0.540837 | -3.684830 | -0.888726 |
| H  | -0.625033 | -4.697611 | -1.517711 |
| B  | 1.096063  | -1.348232 | -0.267560 |
| B  | 0.628661  | -2.178135 | 1.271108  |
| H  | 1.330547  | -2.050597 | 2.224936  |
| Pd | -3.111816 | 0.156739  | -0.038634 |
| C  | 2.457520  | -0.617005 | -0.541139 |
| C  | 3.561775  | -0.861853 | 0.309868  |
| C  | 2.710035  | 0.119309  | -1.720338 |
| C  | 4.829470  | -0.342883 | 0.032528  |
| H  | 3.433213  | -1.488997 | 1.199383  |
| C  | 3.979313  | 0.637964  | -1.999318 |
| H  | 1.910453  | 0.278160  | -2.450616 |
| C  | 5.063393  | 0.426813  | -1.125272 |
| H  | 5.658553  | -0.553017 | 0.717342  |
| H  | 4.135617  | 1.206579  | -2.922682 |
| C  | 6.440478  | 0.956178  | -1.442241 |
| H  | 7.052275  | 0.169842  | -1.923123 |
| H  | 6.395456  | 1.811896  | -2.135179 |
| H  | 6.971836  | 1.269124  | -0.527868 |



**IMA2-B4**Lowest frequency = 25.25 cm<sup>-1</sup>

Charge = 1, Multiplicity = 1

63

|    |           |           |           |
|----|-----------|-----------|-----------|
| O  | 1.416630  | 0.345117  | 1.719532  |
| N  | -0.092658 | -1.224183 | 2.269135  |
| C  | 0.661041  | -0.626230 | 1.349276  |
| C  | 0.793819  | -0.986843 | -0.115759 |
| C  | -0.362722 | -1.314367 | -1.256455 |
| C  | -1.808683 | -1.457080 | -0.846508 |
| C  | -2.590972 | -2.484086 | -1.409922 |
| H  | -2.150955 | -3.166540 | -2.139152 |
| C  | -3.932973 | -2.636539 | -1.039546 |
| H  | -4.526201 | -3.438067 | -1.489955 |
| C  | -4.511679 | -1.771113 | -0.101160 |
| H  | -5.561070 | -1.891447 | 0.185087  |
| C  | -3.737368 | -0.749024 | 0.465928  |
| H  | -4.177748 | -0.062351 | 1.195718  |
| C  | -2.397669 | -0.589011 | 0.096006  |
| H  | -1.817572 | 0.217842  | 0.545425  |
| C  | -0.122334 | -0.609464 | 3.625541  |
| H  | -0.404380 | -1.411484 | 4.323854  |
| H  | 0.896137  | -0.276583 | 3.873830  |
| C  | -1.117127 | 0.552044  | 3.682104  |
| H  | -1.128979 | 0.976238  | 4.699671  |
| H  | -0.831726 | 1.349636  | 2.976452  |
| H  | -2.138374 | 0.212207  | 3.439883  |
| C  | -0.865622 | -2.476540 | 2.114838  |
| H  | -1.837486 | -2.306161 | 2.606347  |
| H  | -1.076443 | -2.636535 | 1.053089  |
| C  | -0.131356 | -3.675331 | 2.717499  |
| H  | 0.829050  | -3.848666 | 2.204228  |
| H  | 0.067340  | -3.541497 | 3.793847  |
| H  | -0.756781 | -4.575413 | 2.597812  |
| B  | 0.761909  | -2.576962 | -0.772373 |
| B  | 2.035481  | -2.599458 | -1.998033 |
| H  | 2.589301  | -3.632075 | -2.232004 |
| B  | 2.307069  | -1.737847 | -0.476647 |
| H  | 2.958489  | -2.066291 | 0.470935  |
| B  | 2.854215  | -1.002257 | -2.011684 |
| H  | 4.023167  | -0.874544 | -2.235536 |
| B  | 1.641242  | 0.242125  | -2.495501 |
| H  | 1.919466  | 1.254015  | -3.069444 |
| B  | 0.091990  | -0.601715 | -2.762695 |
| H  | -0.796968 | -0.250561 | -3.474368 |
| B  | 0.338938  | -2.326039 | -2.465168 |
| H  | -0.347441 | -3.131640 | -3.010321 |
| B  | 1.627580  | -1.378025 | -3.247339 |
| H  | 1.882852  | -1.540552 | -4.403446 |
| B  | 0.343350  | 0.335238  | -1.269805 |
| B  | 2.022047  | -0.025256 | -0.808921 |
| Pd | 2.835302  | 1.212548  | 0.508307  |
| H  | 0.348086  | -3.472132 | -0.111911 |
| C  | -0.504021 | 1.608601  | -0.919208 |
| C  | -1.679261 | 1.879404  | -1.661522 |

|   |           |          |           |
|---|-----------|----------|-----------|
| C | -0.138494 | 2.559861 | 0.057221  |
| C | -2.447543 | 3.020966 | -1.424001 |
| H | -2.007014 | 1.178042 | -2.433932 |
| C | -0.906109 | 3.706065 | 0.296487  |
| H | 0.771903  | 2.408088 | 0.653357  |
| C | -2.080233 | 3.959314 | -0.437250 |
| H | -3.351849 | 3.190477 | -2.018809 |
| H | -0.584228 | 4.419352 | 1.063292  |
| C | -2.900030 | 5.204704 | -0.205997 |
| H | -2.658407 | 5.675876 | 0.760290  |
| H | -2.703048 | 5.947915 | -1.001095 |
| H | -3.980537 | 4.982965 | -0.230062 |

### IMA3-B6

Lowest frequency = 14.66 cm<sup>-1</sup>

Charge = 0, Multiplicity = 1

70

|   |           |           |           |
|---|-----------|-----------|-----------|
| O | -0.172404 | -2.148743 | -0.459436 |
| N | 1.896020  | -2.172898 | -1.309512 |
| C | 0.807330  | -1.487546 | -0.922621 |
| C | 0.612546  | 0.018349  | -1.076848 |
| C | 0.221276  | 0.880112  | 0.295575  |
| C | 0.352846  | 0.166224  | 1.620659  |
| C | -0.620777 | 0.362177  | 2.619225  |
| H | -1.462278 | 1.030442  | 2.430332  |
| C | -0.529948 | -0.319011 | 3.838123  |
| H | -1.299446 | -0.157426 | 4.599281  |
| C | 0.523927  | -1.213470 | 4.075929  |
| H | 0.588042  | -1.749970 | 5.028074  |
| C | 1.492944  | -1.416276 | 3.084912  |
| H | 2.324178  | -2.107759 | 3.256285  |
| C | 1.409898  | -0.728487 | 1.868148  |
| H | 2.187234  | -0.884178 | 1.117153  |
| C | 1.855252  | -3.644464 | -1.138786 |
| H | 0.849729  | -3.990597 | -1.421875 |
| H | 2.580593  | -4.061868 | -1.854723 |
| C | 2.189561  | -4.068512 | 0.293345  |
| H | 2.183857  | -5.169356 | 0.365001  |
| H | 3.190532  | -3.710459 | 0.591744  |
| H | 1.444076  | -3.668684 | 0.998816  |
| C | 3.139761  | -1.612772 | -1.852384 |
| H | 3.165171  | -0.545409 | -1.618720 |
| H | 3.973640  | -2.074070 | -1.293629 |
| C | 3.294753  | -1.849588 | -3.355754 |
| H | 3.325546  | -2.924422 | -3.603370 |
| H | 2.463714  | -1.386805 | -3.912267 |
| H | 4.239649  | -1.396050 | -3.699634 |
| B | -1.108199 | 0.289891  | -0.710015 |
| B | -1.574220 | 1.642623  | -1.729525 |
| H | -2.703807 | 1.711779  | -2.109987 |
| B | -0.457286 | 0.404204  | -2.366875 |
| H | -0.694420 | -0.480491 | -3.134787 |
| B | -0.159031 | 2.121128  | -2.714118 |
| H | -0.267082 | 2.538768  | -3.831537 |
| B | 1.120127  | 2.696114  | -1.613427 |
| H | 1.930985  | 3.525415  | -1.911758 |

|    |           |           |           |
|----|-----------|-----------|-----------|
| B  | 0.507785  | 2.553346  | 0.054072  |
| H  | 0.871748  | 3.177707  | 1.005538  |
| B  | -1.139765 | 1.910063  | -0.020587 |
| H  | -1.909317 | 2.134387  | 0.859454  |
| B  | -0.589061 | 3.055248  | -1.258821 |
| H  | -1.016939 | 4.173250  | -1.290205 |
| B  | 1.673927  | 1.367353  | -0.580074 |
| B  | 1.204945  | 1.058164  | -2.285181 |
| H  | 2.032576  | 0.653463  | -3.042943 |
| Pd | -1.968288 | -1.309543 | 0.018682  |
| O  | -3.626797 | -0.362085 | 0.610518  |
| C  | -4.484916 | -0.019319 | -0.313195 |
| O  | -4.521017 | -0.345842 | -1.489087 |
| C  | -5.507839 | 1.002305  | 0.251035  |
| F  | -6.555871 | 1.164906  | -0.573266 |
| F  | -5.984255 | 0.642917  | 1.464641  |
| F  | -4.901604 | 2.212796  | 0.392306  |
| C  | 3.148729  | 1.349013  | -0.019179 |
| C  | 4.235607  | 1.396736  | -0.921624 |
| C  | 3.454874  | 1.499420  | 1.351741  |
| C  | 5.557763  | 1.514117  | -0.478002 |
| H  | 4.042668  | 1.367382  | -2.000026 |
| C  | 4.775430  | 1.619213  | 1.797460  |
| H  | 2.648042  | 1.539640  | 2.088411  |
| C  | 5.856025  | 1.612667  | 0.894123  |
| H  | 6.371628  | 1.549388  | -1.211525 |
| H  | 4.970066  | 1.734314  | 2.870078  |
| C  | 7.282324  | 1.709226  | 1.382335  |
| H  | 7.950740  | 2.103573  | 0.598905  |
| H  | 7.360242  | 2.361308  | 2.268902  |
| H  | 7.664775  | 0.712443  | 1.674571  |

#### IMA3-B4

Lowest frequency = 13.79 cm<sup>-1</sup>

Charge = 0, Multiplicity = 1

70

|   |           |           |           |
|---|-----------|-----------|-----------|
| O | -0.066648 | -0.085552 | 2.036724  |
| N | -1.978939 | -1.256226 | 2.104785  |
| C | -0.899559 | -0.824134 | 1.427174  |
| C | -0.521440 | -1.157290 | -0.007229 |
| C | -1.467556 | -1.140038 | -1.370103 |
| C | -2.954777 | -0.900207 | -1.253273 |
| C | -3.842971 | -1.639263 | -2.058406 |
| H | -3.447295 | -2.375442 | -2.760178 |
| C | -5.226007 | -1.439225 | -1.964325 |
| H | -5.897483 | -2.023785 | -2.601225 |
| C | -5.746317 | -0.500192 | -1.063441 |
| H | -6.827510 | -0.343897 | -0.991567 |
| C | -4.869200 | 0.239484  | -0.258501 |
| H | -5.257294 | 0.983187  | 0.444962  |
| C | -3.486630 | 0.045969  | -0.353419 |
| H | -2.826153 | 0.640551  | 0.277452  |
| C | -2.164543 | -0.699480 | 3.467348  |
| H | -2.804403 | -1.409864 | 4.013631  |
| H | -1.182969 | -0.664988 | 3.963318  |
| C | -2.802308 | 0.691364  | 3.420187  |

|    |           |           |           |
|----|-----------|-----------|-----------|
| H  | -2.931166 | 1.078871  | 4.445011  |
| H  | -2.161725 | 1.393490  | 2.861623  |
| H  | -3.793935 | 0.655751  | 2.937032  |
| C  | -2.949515 | -2.284854 | 1.694009  |
| H  | -3.947290 | -1.919314 | 1.990618  |
| H  | -2.958296 | -2.355072 | 0.602308  |
| C  | -2.643747 | -3.646651 | 2.321742  |
| H  | -1.656331 | -4.013116 | 1.995279  |
| H  | -2.649984 | -3.601791 | 3.424149  |
| H  | -3.408266 | -4.376229 | 2.005336  |
| B  | -0.824375 | -2.661085 | -0.787771 |
| B  | 0.613426  | -2.986245 | -1.750420 |
| H  | 0.913786  | -4.125878 | -1.961549 |
| B  | 0.789976  | -2.268612 | -0.136856 |
| H  | 1.118272  | -2.815516 | 0.873500  |
| B  | 1.795883  | -1.668683 | -1.481706 |
| H  | 2.973390  | -1.866595 | -1.487667 |
| B  | 1.070993  | -0.141423 | -2.072520 |
| H  | 1.701804  | 0.773316  | -2.512559 |
| B  | -0.554488 | -0.530173 | -2.693888 |
| H  | -1.166353 | 0.065811  | -3.527653 |
| B  | -0.827438 | -2.266366 | -2.505434 |
| H  | -1.584425 | -2.845530 | -3.222294 |
| B  | 0.787218  | -1.671377 | -2.947575 |
| H  | 1.212726  | -1.865478 | -4.050099 |
| B  | -0.364100 | 0.255183  | -1.099839 |
| B  | 1.062051  | -0.520155 | -0.343929 |
| Pd | 1.785110  | 0.374413  | 1.260666  |
| O  | 3.534003  | 0.831520  | 0.404428  |
| C  | 4.411541  | -0.134835 | 0.399490  |
| O  | 4.359276  | -1.221142 | 0.958661  |
| C  | 5.609702  | 0.211256  | -0.524086 |
| F  | 6.664545  | -0.588385 | -0.284790 |
| F  | 5.244466  | 0.034899  | -1.821217 |
| F  | 6.020142  | 1.491268  | -0.385001 |
| H  | -1.579251 | -3.437679 | -0.299416 |
| C  | -0.961824 | 1.690444  | -0.833507 |
| C  | -1.885827 | 2.249058  | -1.748541 |
| C  | -0.591125 | 2.496011  | 0.263310  |
| C  | -2.427143 | 3.523465  | -1.559894 |
| H  | -2.199615 | 1.670057  | -2.621741 |
| C  | -1.134460 | 3.772264  | 0.456013  |
| H  | 0.157841  | 2.118924  | 0.971245  |
| C  | -2.067309 | 4.311286  | -0.448540 |
| H  | -3.143708 | 3.916025  | -2.290806 |
| H  | -0.817115 | 4.364505  | 1.322292  |
| C  | -2.629886 | 5.700947  | -0.262822 |
| H  | -2.579632 | 6.019263  | 0.791878  |
| H  | -2.055828 | 6.435834  | -0.858652 |
| H  | -3.680023 | 5.758942  | -0.597201 |

**IMB-B6**Lowest frequency = 15.73 cm<sup>-1</sup>

Charge = 1, Multiplicity = 1

86

|    |           |           |           |
|----|-----------|-----------|-----------|
| O  | 0.113444  | -1.372279 | 1.828079  |
| N  | 2.240699  | -2.021977 | 1.890552  |
| C  | 1.191845  | -1.609208 | 1.181213  |
| C  | 1.129208  | -1.459764 | -0.332189 |
| C  | 0.560392  | -0.027259 | -0.971240 |
| C  | 0.358566  | 1.195381  | -0.103287 |
| C  | 0.993914  | 1.373774  | 1.140059  |
| H  | 1.685501  | 0.623170  | 1.522508  |
| C  | 0.803090  | 2.543091  | 1.889557  |
| H  | 1.292015  | 2.641235  | 2.862490  |
| C  | -0.000114 | 3.577715  | 1.399456  |
| H  | -0.148656 | 4.488689  | 1.985323  |
| C  | -0.612682 | 3.440548  | 0.138851  |
| H  | -1.180251 | 4.271462  | -0.293944 |
| C  | -0.439488 | 2.255613  | -0.612784 |
| H  | -0.852254 | 2.185668  | -1.621701 |
| C  | 2.035974  | -2.202183 | 3.356551  |
| H  | 2.805707  | -2.917789 | 3.681867  |
| H  | 1.047115  | -2.661599 | 3.502146  |
| C  | 2.148218  | -0.884223 | 4.124334  |
| H  | 2.070369  | -1.086085 | 5.205326  |
| H  | 1.332203  | -0.197261 | 3.854452  |
| H  | 3.119314  | -0.394363 | 3.937178  |
| C  | 3.604582  | -2.294918 | 1.398886  |
| H  | 4.291569  | -1.782455 | 2.094009  |
| H  | 3.723732  | -1.807424 | 0.428001  |
| C  | 3.915006  | -3.790159 | 1.322743  |
| H  | 3.220504  | -4.305023 | 0.639420  |
| H  | 3.858271  | -4.275641 | 2.311209  |
| H  | 4.940790  | -3.922608 | 0.940874  |
| B  | 2.213766  | -0.510047 | -1.406638 |
| B  | 1.996899  | -1.325077 | -2.972029 |
| H  | 2.923346  | -1.298723 | -3.727119 |
| B  | 2.047558  | -2.297581 | -1.494396 |
| H  | 2.952824  | -2.978973 | -1.132976 |
| B  | 0.907468  | -2.727071 | -2.792798 |
| H  | 1.057815  | -3.736494 | -3.415829 |
| B  | -0.711246 | -2.123706 | -2.331820 |
| H  | -1.734981 | -2.657622 | -2.640894 |
| B  | -0.596441 | -0.354124 | -2.217900 |
| H  | -1.498943 | 0.408748  | -2.359637 |
| B  | 1.059220  | 0.139557  | -2.603155 |
| H  | 1.276475  | 1.254869  | -2.970970 |
| B  | 0.295475  | -1.206647 | -3.489648 |
| H  | -0.016313 | -1.076158 | -4.636259 |
| B  | -0.588306 | -1.350931 | -0.763493 |
| B  | 0.381303  | -2.807302 | -1.095513 |
| H  | 0.222461  | -3.771006 | -0.410871 |
| Pd | -1.683592 | -0.992152 | 0.919241  |
| O  | -2.233415 | 1.881808  | 2.893414  |
| C  | -2.190646 | 0.761985  | 3.472008  |

|    |           |           |           |
|----|-----------|-----------|-----------|
| O  | -2.313856 | -0.390246 | 2.980461  |
| C  | -1.856129 | 0.827707  | 4.986427  |
| F  | -2.064006 | -0.345131 | 5.604104  |
| F  | -2.554668 | 1.780216  | 5.614535  |
| F  | -0.529075 | 1.128362  | 5.104922  |
| C  | 3.509046  | 0.270443  | -0.996162 |
| C  | 4.757800  | -0.390702 | -1.094825 |
| C  | 3.540724  | 1.650787  | -0.698922 |
| C  | 5.961801  | 0.272795  | -0.845129 |
| H  | 4.790520  | -1.443718 | -1.397160 |
| C  | 4.746434  | 2.315626  | -0.446863 |
| H  | 2.616366  | 2.233186  | -0.685124 |
| C  | 5.980549  | 1.640741  | -0.503398 |
| H  | 6.906735  | -0.275003 | -0.932860 |
| H  | 4.729805  | 3.386526  | -0.215852 |
| C  | 7.283488  | 2.362934  | -0.262093 |
| H  | 7.779154  | 2.594459  | -1.223445 |
| H  | 7.126159  | 3.314583  | 0.270565  |
| H  | 7.983698  | 1.742967  | 0.323191  |
| Ag | -2.585253 | 1.769141  | 0.720069  |
| I  | -3.888664 | -0.433178 | -0.366760 |
| C  | -2.234424 | -2.938909 | 1.127853  |
| C  | -2.639555 | -3.768248 | 0.086914  |
| C  | -2.161855 | -3.337432 | 2.459879  |
| C  | -2.957934 | -5.097776 | 0.413230  |
| H  | -2.702578 | -3.427210 | -0.946884 |
| C  | -2.487321 | -4.676669 | 2.744360  |
| H  | -1.883843 | -2.647002 | 3.259538  |
| C  | -2.887807 | -5.573591 | 1.736237  |
| H  | -3.274098 | -5.766981 | -0.394879 |
| H  | -2.427883 | -5.013358 | 3.785540  |
| C  | -3.271794 | -6.996565 | 2.068542  |
| H  | -4.368668 | -7.082886 | 2.180390  |
| H  | -2.966990 | -7.691764 | 1.268898  |
| H  | -2.813965 | -7.326859 | 3.014779  |

#### IMB-B4

Lowest frequency = 19.98 cm<sup>-1</sup>

Charge = 1, Multiplicity = 1

86

|   |          |           |           |
|---|----------|-----------|-----------|
| O | 0.384987 | 1.093042  | 1.183958  |
| N | 2.327716 | 1.689126  | 2.093470  |
| C | 1.621962 | 1.352800  | 1.013473  |
| C | 2.085096 | 1.308791  | -0.435187 |
| C | 3.485049 | 0.467682  | -1.167532 |
| C | 4.558084 | -0.216164 | -0.370559 |
| C | 5.753160 | 0.478909  | -0.078878 |
| H | 5.874426 | 1.515317  | -0.405250 |
| C | 6.795145 | -0.154955 | 0.604702  |
| H | 7.715661 | 0.397064  | 0.817867  |
| C | 6.667412 | -1.495777 | 0.998113  |
| H | 7.483709 | -1.992083 | 1.532052  |
| C | 5.501260 | -2.203778 | 0.677769  |
| H | 5.405066 | -3.259164 | 0.950547  |
| C | 4.457075 | -1.574005 | -0.010909 |
| H | 3.573385 | -2.149728 | -0.285124 |

|    |           |           |           |
|----|-----------|-----------|-----------|
| C  | 1.584408  | 1.770078  | 3.384636  |
| H  | 2.185249  | 2.424907  | 4.033477  |
| H  | 0.621892  | 2.264596  | 3.185046  |
| C  | 1.371298  | 0.401520  | 4.033258  |
| H  | 0.923405  | 0.541105  | 5.030997  |
| H  | 0.679410  | -0.215852 | 3.441101  |
| H  | 2.327960  | -0.133955 | 4.160585  |
| C  | 3.768346  | 1.991072  | 2.165589  |
| H  | 4.158865  | 1.432081  | 3.033341  |
| H  | 4.254855  | 1.568166  | 1.282221  |
| C  | 4.054833  | 3.486804  | 2.302627  |
| H  | 3.659531  | 4.046923  | 1.439536  |
| H  | 3.614736  | 3.908183  | 3.221662  |
| H  | 5.145511  | 3.642004  | 2.349591  |
| B  | 3.380862  | 2.197945  | -1.103389 |
| B  | 2.830404  | 2.723970  | -2.708442 |
| H  | 3.213968  | 3.765629  | -3.151643 |
| B  | 1.678045  | 2.693333  | -1.355069 |
| H  | 1.298920  | 3.638080  | -0.732916 |
| B  | 1.179776  | 2.083686  | -2.962361 |
| H  | 0.355413  | 2.656448  | -3.612150 |
| B  | 1.287091  | 0.299824  | -2.909217 |
| H  | 0.549566  | -0.422034 | -3.510084 |
| B  | 2.978788  | -0.158822 | -2.656054 |
| H  | 3.465828  | -1.200992 | -2.976588 |
| B  | 3.935073  | 1.340824  | -2.555771 |
| H  | 5.101522  | 1.350978  | -2.804527 |
| B  | 2.570976  | 1.248006  | -3.689434 |
| H  | 2.764217  | 1.209896  | -4.868416 |
| B  | 1.839971  | -0.186504 | -1.270440 |
| B  | 0.726602  | 1.204867  | -1.503316 |
| Pd | -0.905795 | 0.699442  | -0.377338 |
| H  | 4.104433  | 2.802738  | -0.384268 |
| C  | 1.304830  | -1.510113 | -0.585954 |
| C  | 0.828498  | -2.547458 | -1.444312 |
| C  | 1.280869  | -1.776597 | 0.802506  |
| C  | 0.331587  | -3.763713 | -0.916811 |
| H  | 0.926297  | -2.434247 | -2.529037 |
| C  | 0.784336  | -2.977352 | 1.321357  |
| H  | 1.679230  | -1.044544 | 1.507530  |
| C  | 0.282200  | -3.988921 | 0.481127  |
| H  | 0.027791  | -4.562205 | -1.603869 |
| H  | 0.765486  | -3.123944 | 2.405656  |
| C  | -0.338797 | -5.233098 | 1.054811  |
| H  | 0.244785  | -5.615934 | 1.908505  |
| H  | -1.350450 | -4.987017 | 1.428245  |
| H  | -0.433750 | -6.029883 | 0.300353  |
| C  | -1.606784 | 2.599683  | -0.262641 |
| C  | -2.121105 | 2.865810  | 1.005117  |
| C  | -1.573139 | 3.533507  | -1.294697 |
| C  | -2.592989 | 4.168334  | 1.247316  |
| H  | -2.170403 | 2.098068  | 1.781407  |
| C  | -2.054169 | 4.824097  | -1.013999 |
| H  | -1.186473 | 3.297156  | -2.286881 |
| C  | -2.568811 | 5.163403  | 0.251175  |
| H  | -2.992384 | 4.398966  | 2.241489  |

|    |           |           |           |
|----|-----------|-----------|-----------|
| H  | -2.029595 | 5.572280  | -1.814312 |
| C  | -3.120123 | 6.544343  | 0.519490  |
| H  | -3.050088 | 6.805439  | 1.587981  |
| H  | -2.586564 | 7.311268  | -0.065616 |
| H  | -4.187771 | 6.594482  | 0.234905  |
| I  | -2.447759 | 0.286898  | -2.448016 |
| Ag | -1.577526 | -2.042974 | -1.210008 |
| O  | -2.194402 | -0.145159 | 1.251711  |
| C  | -2.399887 | -1.347402 | 1.567499  |
| O  | -2.334648 | -2.383337 | 0.856679  |
| C  | -2.681687 | -1.590086 | 3.074703  |
| F  | -1.475090 | -1.763357 | 3.698344  |
| F  | -3.290818 | -0.544614 | 3.653990  |
| F  | -3.411208 | -2.691583 | 3.286716  |

### IMB1-B6

Lowest frequency = 10.18 cm<sup>-1</sup>

Charge = 1, Multiplicity = 1

90

|   |           |           |           |
|---|-----------|-----------|-----------|
| O | 0.542182  | 0.593065  | 1.035800  |
| N | 2.212832  | 0.541067  | 2.513507  |
| C | 1.568024  | -0.018710 | 1.489965  |
| C | 1.906830  | -1.360412 | 0.853192  |
| C | 1.954930  | -1.383421 | -0.822753 |
| C | 1.777273  | -0.044809 | -1.511285 |
| C | 0.830369  | 0.074931  | -2.555185 |
| H | 0.325064  | -0.812093 | -2.941004 |
| C | 0.570799  | 1.326237  | -3.140143 |
| H | -0.164962 | 1.393624  | -3.944836 |
| C | 1.245325  | 2.468333  | -2.693117 |
| H | 1.041916  | 3.441539  | -3.150010 |
| C | 2.194352  | 2.352411  | -1.663299 |
| H | 2.738050  | 3.236003  | -1.314674 |
| C | 2.455933  | 1.111105  | -1.075066 |
| H | 3.190866  | 1.045120  | -0.270219 |
| C | 1.641817  | 1.798849  | 3.066199  |
| H | 0.547134  | 1.692053  | 3.077222  |
| H | 1.994809  | 1.862525  | 4.106629  |
| C | 2.067881  | 3.029739  | 2.264662  |
| H | 1.667626  | 3.937262  | 2.746317  |
| H | 3.166930  | 3.120755  | 2.224715  |
| H | 1.676176  | 2.979181  | 1.236384  |
| C | 3.448648  | 0.063402  | 3.161457  |
| H | 3.967077  | -0.598845 | 2.463521  |
| H | 4.092265  | 0.950186  | 3.290839  |
| C | 3.181123  | -0.623485 | 4.500949  |
| H | 2.703674  | 0.058103  | 5.224740  |
| H | 2.533070  | -1.505154 | 4.370289  |
| H | 4.139227  | -0.957060 | 4.932686  |
| B | 0.473803  | -1.886611 | -0.037271 |
| B | 0.497059  | -3.632048 | 0.013890  |
| H | -0.533175 | -4.236716 | -0.010539 |
| B | 1.004829  | -2.696246 | 1.454438  |
| H | 0.406024  | -2.512229 | 2.469400  |
| B | 1.932672  | -4.131733 | 0.955773  |
| H | 1.935141  | -5.106511 | 1.648338  |



|    |           |           |           |
|----|-----------|-----------|-----------|
| B  | 3.392830  | -3.581733 | 0.087971  |
| H  | 4.441678  | -4.152994 | 0.138590  |
| B  | 2.868420  | -2.723063 | -1.382462 |
| H  | 3.483794  | -2.566475 | -2.392710 |
| B  | 1.101058  | -2.768265 | -1.426351 |
| H  | 0.536969  | -2.679571 | -2.469454 |
| B  | 1.984201  | -4.175328 | -0.823327 |
| H  | 2.015830  | -5.183489 | -1.464605 |
| B  | 3.448299  | -1.808650 | 0.035174  |
| B  | 2.794219  | -2.663461 | 1.478536  |
| H  | 3.349488  | -2.547741 | 2.523652  |
| Pd | -0.803423 | -0.322653 | -0.259705 |
| O  | -1.696200 | 1.843474  | -0.687850 |
| C  | 4.794569  | -1.005729 | -0.025566 |
| C  | 5.750298  | -1.156138 | 1.005564  |
| C  | 5.203669  | -0.290405 | -1.175186 |
| C  | 7.015823  | -0.565136 | 0.925781  |
| H  | 5.517062  | -1.778112 | 1.877097  |
| C  | 6.468177  | 0.299865  | -1.256746 |
| H  | 4.531168  | -0.203639 | -2.034016 |
| C  | 7.397908  | 0.184831  | -0.203507 |
| H  | 7.727945  | -0.704399 | 1.746741  |
| H  | 6.746485  | 0.848854  | -2.163257 |
| C  | 8.774785  | 0.793360  | -0.310365 |
| H  | 9.215312  | 0.974668  | 0.683538  |
| H  | 9.454383  | 0.111397  | -0.855405 |
| H  | 8.752440  | 1.745493  | -0.866347 |
| C  | -1.912807 | -0.871413 | 1.335958  |
| C  | -2.171323 | 0.207479  | 2.182427  |
| C  | -2.353852 | -2.167262 | 1.614893  |
| C  | -2.895394 | -0.034365 | 3.363698  |
| H  | -1.830984 | 1.218273  | 1.950176  |
| C  | -3.066264 | -2.376942 | 2.804700  |
| H  | -2.157698 | -3.002114 | 0.940790  |
| C  | -3.352371 | -1.322666 | 3.695266  |
| H  | -3.102713 | 0.808519  | 4.032538  |
| H  | -3.413361 | -3.391454 | 3.030823  |
| I  | -2.498842 | -1.514969 | -1.807734 |
| C  | -4.147446 | -1.571866 | 4.955092  |
| H  | -3.745898 | -2.433951 | 5.515214  |
| H  | -4.140719 | -0.691905 | 5.617691  |
| H  | -5.200010 | -1.804332 | 4.710326  |
| C  | -2.977398 | 2.289365  | -1.111322 |
| H  | -3.657190 | 1.422795  | -1.073890 |
| C  | -3.478990 | 3.364195  | -0.122876 |
| C  | -2.888870 | 2.784847  | -2.570915 |
| F  | -2.622033 | 4.412336  | -0.101223 |
| F  | -3.521699 | 2.847059  | 1.122691  |
| F  | -4.700312 | 3.806376  | -0.437855 |
| F  | -4.009184 | 3.388683  | -2.972640 |
| F  | -2.630759 | 1.758468  | -3.400161 |
| F  | -1.855146 | 3.666532  | -2.682029 |
| H  | -1.032417 | 2.536259  | -0.888386 |

**IMB1-B4**Lowest frequency = 16.48 cm<sup>-1</sup>

Charge = 1, Multiplicity = 1

90

|    |           |           |           |
|----|-----------|-----------|-----------|
| O  | 0.111114  | -0.915174 | -0.527259 |
| N  | 1.241981  | -2.638961 | -1.376559 |
| C  | 1.067793  | -1.744280 | -0.400406 |
| C  | 1.844133  | -1.628137 | 0.904883  |
| C  | 3.604037  | -1.366959 | 1.129210  |
| C  | 4.617577  | -1.437209 | 0.026040  |
| C  | 5.242702  | -2.661924 | -0.291944 |
| H  | 4.961545  | -3.572805 | 0.243680  |
| C  | 6.251920  | -2.713459 | -1.259046 |
| H  | 6.729751  | -3.670193 | -1.491078 |
| C  | 6.666288  | -1.540827 | -1.908326 |
| H  | 7.459033  | -1.581278 | -2.661759 |
| C  | 6.085678  | -0.312750 | -1.561960 |
| H  | 6.430348  | 0.612429  | -2.033817 |
| C  | 5.076299  | -0.257411 | -0.593758 |
| H  | 4.664329  | 0.709919  | -0.300966 |
| C  | 0.267596  | -2.600159 | -2.502907 |
| H  | 0.273538  | -3.609162 | -2.942834 |
| H  | -0.728923 | -2.412186 | -2.077606 |
| C  | 0.621307  | -1.542765 | -3.549288 |
| H  | -0.097336 | -1.603739 | -4.383125 |
| H  | 0.559342  | -0.531706 | -3.119640 |
| H  | 1.634492  | -1.705085 | -3.955728 |
| C  | 2.273841  | -3.686910 | -1.464462 |
| H  | 2.622106  | -3.690675 | -2.511297 |
| H  | 3.129487  | -3.381548 | -0.856201 |
| C  | 1.751647  | -5.064096 | -1.053816 |
| H  | 1.406292  | -5.060167 | -0.007029 |
| H  | 0.915937  | -5.392016 | -1.694377 |
| H  | 2.562657  | -5.804994 | -1.150639 |
| B  | 2.799393  | -2.818176 | 1.652097  |
| B  | 2.527921  | -2.631320 | 3.398479  |
| H  | 2.567768  | -3.593658 | 4.106319  |
| B  | 1.167580  | -2.397683 | 2.274700  |
| H  | 0.288601  | -3.175428 | 2.057708  |
| B  | 1.403106  | -1.260757 | 3.641934  |
| H  | 0.617502  | -1.215569 | 4.541474  |
| B  | 2.211676  | 0.202804  | 2.990532  |
| H  | 2.017976  | 1.300699  | 3.414977  |
| B  | 3.809668  | -0.246966 | 2.382853  |
| H  | 4.744425  | 0.487893  | 2.283881  |
| B  | 4.013924  | -1.997746 | 2.652671  |
| H  | 5.095301  | -2.495712 | 2.730212  |
| B  | 3.154656  | -1.020151 | 3.862564  |
| H  | 3.650353  | -0.800774 | 4.927759  |
| B  | 2.455855  | -0.031730 | 1.223655  |
| B  | 0.994448  | -0.649890 | 2.045845  |
| Pd | -0.425761 | 0.383856  | 1.019980  |
| H  | 3.008464  | -3.846125 | 1.100054  |
| C  | 2.167729  | 1.113496  | 0.163031  |
| C  | 1.687188  | 2.358154  | 0.640971  |

|   |           |           |           |
|---|-----------|-----------|-----------|
| C | 2.255250  | 0.959301  | -1.245110 |
| C | 1.322057  | 3.393930  | -0.240253 |
| H | 1.620058  | 2.535365  | 1.717633  |
| C | 1.901766  | 1.987547  | -2.116330 |
| H | 2.615417  | 0.017089  | -1.669260 |
| C | 1.431990  | 3.235350  | -1.633816 |
| H | 0.956727  | 4.339406  | 0.173964  |
| H | 1.990222  | 1.832466  | -3.197107 |
| C | 1.104845  | 4.356422  | -2.589402 |
| H | 0.461423  | 4.004492  | -3.412906 |
| H | 0.596384  | 5.187560  | -2.077884 |
| H | 2.033298  | 4.749486  | -3.042501 |
| C | -1.890653 | -0.904818 | 1.517365  |
| C | -2.663035 | -1.281428 | 0.414729  |
| C | -2.117682 | -1.427810 | 2.793849  |
| C | -3.697019 | -2.215152 | 0.607318  |
| H | -2.465806 | -0.894546 | -0.587677 |
| C | -3.149949 | -2.364157 | 2.953342  |
| H | -1.519343 | -1.123402 | 3.654029  |
| C | -3.959310 | -2.769526 | 1.873456  |
| H | -4.300670 | -2.517414 | -0.256097 |
| H | -3.329775 | -2.776163 | 3.952764  |
| C | -5.087043 | -3.753042 | 2.079711  |
| H | -5.475443 | -4.129653 | 1.119948  |
| H | -4.759522 | -4.614500 | 2.686565  |
| H | -5.925187 | -3.274358 | 2.618929  |
| I | -1.166909 | 1.919800  | 2.965535  |
| C | -2.962905 | 3.471417  | -1.222013 |
| C | -2.568679 | 1.982743  | -1.326390 |
| C | -2.451089 | 1.448732  | -2.770066 |
| H | -3.339482 | 1.394846  | -0.803726 |
| F | -1.369254 | 1.980845  | -3.388026 |
| F | -2.267623 | 0.104204  | -2.737923 |
| F | -3.536304 | 1.702340  | -3.506795 |
| F | -1.997085 | 4.244534  | -1.784316 |
| F | -3.069439 | 3.819266  | 0.067441  |
| F | -4.124224 | 3.723695  | -1.838769 |
| O | -1.342321 | 1.769481  | -0.662157 |
| H | -0.637966 | 2.352219  | -1.032929 |

### IMB2-B6

Lowest frequency = 15.23 cm<sup>-1</sup>

Charge = 1, Multiplicity = 1

78

|   |           |           |           |
|---|-----------|-----------|-----------|
| O | -0.236676 | 0.865503  | -1.239357 |
| N | 1.397705  | 2.361180  | -0.952922 |
| C | 0.721085  | 1.301102  | -0.513901 |
| C | 0.941500  | 0.601726  | 0.821814  |
| C | 1.056365  | -1.077853 | 0.757130  |
| C | 1.043219  | -1.671090 | -0.636505 |
| C | 0.083418  | -2.664171 | -0.948437 |
| H | -0.510553 | -3.120186 | -0.154351 |
| C | -0.058861 | -3.126880 | -2.269491 |
| H | -0.809758 | -3.892489 | -2.485653 |
| C | 0.760670  | -2.620303 | -3.284739 |
| H | 0.654574  | -2.982702 | -4.311622 |

|    |           |           |           |
|----|-----------|-----------|-----------|
| C  | 1.725768  | -1.648901 | -2.974397 |
| H  | 2.375996  | -1.251711 | -3.759939 |
| C  | 1.858851  | -1.167214 | -1.667475 |
| H  | 2.595365  | -0.389555 | -1.455167 |
| C  | 0.946797  | 2.972830  | -2.232532 |
| H  | -0.153258 | 2.961138  | -2.238753 |
| H  | 1.282467  | 4.020525  | -2.203528 |
| C  | 1.513655  | 2.246035  | -3.452919 |
| H  | 1.200151  | 2.772582  | -4.369529 |
| H  | 2.616896  | 2.227909  | -3.430535 |
| H  | 1.138476  | 1.211630  | -3.500226 |
| C  | 2.567991  | 2.995694  | -0.317934 |
| H  | 3.021580  | 2.272210  | 0.364484  |
| H  | 3.301018  | 3.169460  | -1.124107 |
| C  | 2.215159  | 4.301198  | 0.395500  |
| H  | 1.805595  | 5.053005  | -0.299680 |
| H  | 1.479087  | 4.128063  | 1.197185  |
| H  | 3.128508  | 4.722178  | 0.847383  |
| B  | -0.486971 | -0.366851 | 1.128044  |
| B  | -0.698765 | -0.420089 | 2.856706  |
| H  | -1.795765 | -0.512592 | 3.320768  |
| B  | -0.139573 | 1.091854  | 2.071008  |
| H  | -0.759625 | 2.090041  | 1.865693  |
| B  | 0.629050  | 0.538557  | 3.577942  |
| H  | 0.486114  | 1.171358  | 4.582229  |
| B  | 2.176683  | -0.246693 | 3.160988  |
| H  | 3.145308  | -0.196023 | 3.859508  |
| B  | 1.821119  | -1.682706 | 2.167862  |
| H  | 2.493375  | -2.659428 | 2.036818  |
| B  | 0.063708  | -1.790466 | 1.995228  |
| H  | -0.446291 | -2.842399 | 1.776002  |
| B  | 0.745609  | -1.238367 | 3.529780  |
| H  | 0.682182  | -1.936485 | 4.497686  |
| B  | 2.448023  | -0.194135 | 1.407424  |
| B  | 1.639405  | 1.176981  | 2.254527  |
| H  | 2.164128  | 2.244450  | 2.260592  |
| Pd | -1.618195 | -0.532964 | -0.556198 |
| C  | 3.887833  | -0.163882 | 0.785828  |
| C  | 4.775179  | 0.886564  | 1.120529  |
| C  | 4.431842  | -1.255099 | 0.071000  |
| C  | 6.109021  | 0.881210  | 0.702950  |
| H  | 4.426910  | 1.712549  | 1.750898  |
| C  | 5.767006  | -1.262003 | -0.346780 |
| H  | 3.810829  | -2.127770 | -0.153340 |
| C  | 6.631021  | -0.190112 | -0.050272 |
| H  | 6.763865  | 1.713934  | 0.982980  |
| H  | 6.151198  | -2.124805 | -0.901923 |
| C  | 8.079134  | -0.206823 | -0.474504 |
| H  | 8.730049  | -0.447902 | 0.386562  |
| H  | 8.263443  | -0.961588 | -1.255674 |
| H  | 8.396639  | 0.779018  | -0.855196 |
| C  | -2.894280 | 0.961895  | -0.156449 |
| C  | -3.125875 | 1.755077  | -1.283342 |
| C  | -3.483681 | 1.220168  | 1.082567  |
| C  | -3.979173 | 2.864348  | -1.147018 |
| H  | -2.661833 | 1.543331  | -2.252250 |

|   |           |           |           |
|---|-----------|-----------|-----------|
| C | -4.318202 | 2.342403  | 1.189315  |
| H | -3.310472 | 0.578496  | 1.948335  |
| C | -4.585145 | 3.176493  | 0.084470  |
| H | -4.166925 | 3.494750  | -2.023254 |
| H | -4.781569 | 2.557956  | 2.158585  |
| I | -3.410131 | -2.208827 | 0.203125  |
| C | -5.520783 | 4.354501  | 0.217086  |
| H | -5.318027 | 4.924027  | 1.139943  |
| H | -5.434985 | 5.037878  | -0.642644 |
| H | -6.569865 | 4.009178  | 0.269957  |

### IMB2-B4

Lowest frequency = 10.43 cm<sup>-1</sup>

Charge = 1, Multiplicity = 1

78

|   |           |           |           |
|---|-----------|-----------|-----------|
| O | -0.019404 | -0.543358 | 1.898782  |
| N | -2.204427 | -0.466784 | 2.361904  |
| C | -1.222021 | -0.704075 | 1.493958  |
| C | -1.332735 | -1.217966 | 0.062017  |
| C | -2.469394 | -0.896698 | -1.171884 |
| C | -3.721658 | -0.078718 | -0.956729 |
| C | -4.968098 | -0.744720 | -0.990213 |
| H | -5.008071 | -1.821826 | -1.166280 |
| C | -6.158690 | -0.038148 | -0.794368 |
| H | -7.113003 | -0.572608 | -0.828030 |
| C | -6.129015 | 1.344778  | -0.561130 |
| H | -7.060847 | 1.897802  | -0.407295 |
| C | -4.897897 | 2.012839  | -0.538979 |
| H | -4.860327 | 3.093921  | -0.372395 |
| C | -3.701474 | 1.311601  | -0.739759 |
| H | -2.757797 | 1.853340  | -0.727532 |
| C | -1.806539 | 0.027799  | 3.712003  |
| H | -2.657758 | -0.188206 | 4.373688  |
| H | -0.945520 | -0.567163 | 4.052732  |
| C | -1.481277 | 1.522197  | 3.719882  |
| H | -1.316919 | 1.849203  | 4.759888  |
| H | -0.564553 | 1.733053  | 3.146885  |
| H | -2.311805 | 2.113807  | 3.299501  |
| C | -3.647431 | -0.719397 | 2.179268  |
| H | -4.172720 | 0.192256  | 2.511166  |
| H | -3.850022 | -0.824486 | 1.111351  |
| C | -4.130818 | -1.951347 | 2.946372  |
| H | -3.602559 | -2.859117 | 2.610901  |
| H | -3.992837 | -1.850286 | 4.035625  |
| H | -5.208274 | -2.086173 | 2.755220  |
| B | -2.415326 | -2.465907 | -0.425725 |
| B | -1.494255 | -3.511198 | -1.524084 |
| H | -1.759276 | -4.675152 | -1.577308 |
| B | -0.695046 | -2.826385 | -0.098233 |
| H | -0.428286 | -3.372889 | 0.933870  |
| B | 0.167146  | -2.869998 | -1.663666 |
| H | 1.121747  | -3.572060 | -1.796958 |
| B | 0.072988  | -1.211119 | -2.357515 |
| H | 0.938825  | -0.717325 | -3.017954 |
| B | -1.644682 | -0.861974 | -2.668032 |
| H | -2.079368 | -0.104901 | -3.480326 |

|    |           |           |           |
|----|-----------|-----------|-----------|
| B  | -2.590820 | -2.280866 | -2.178370 |
| H  | -3.650167 | -2.490202 | -2.680283 |
| B  | -1.009056 | -2.512042 | -2.937431 |
| H  | -0.927691 | -2.955170 | -4.044317 |
| B  | -0.842462 | -0.137449 | -1.238203 |
| B  | 0.235980  | -1.432980 | -0.637953 |
| Pd | 1.652319  | -1.132629 | 0.793259  |
| H  | -3.290931 | -2.767418 | 0.318855  |
| C  | -0.575665 | 1.403971  | -1.128098 |
| C  | -0.382934 | 2.116810  | -2.333867 |
| C  | -0.485808 | 2.137513  | 0.073063  |
| C  | -0.127369 | 3.491435  | -2.335289 |
| H  | -0.434146 | 1.588164  | -3.290369 |
| C  | -0.233190 | 3.512236  | 0.071934  |
| H  | -0.607526 | 1.639760  | 1.035350  |
| C  | -0.050514 | 4.219606  | -1.131978 |
| H  | 0.015803  | 4.008900  | -3.290468 |
| H  | -0.166246 | 4.046622  | 1.025770  |
| C  | 0.224741  | 5.703428  | -1.140435 |
| H  | 0.307101  | 6.105803  | -0.118169 |
| H  | 1.163490  | 5.927987  | -1.677081 |
| H  | -0.581738 | 6.250823  | -1.660831 |
| C  | 2.322126  | 0.718781  | 0.475407  |
| C  | 2.582245  | 1.278413  | -0.772792 |
| C  | 2.493578  | 1.403659  | 1.680404  |
| C  | 2.999496  | 2.618555  | -0.801683 |
| H  | 2.457377  | 0.715322  | -1.698905 |
| C  | 2.922907  | 2.739355  | 1.613422  |
| H  | 2.292086  | 0.942575  | 2.652972  |
| C  | 3.178883  | 3.365332  | 0.377690  |
| H  | 3.195255  | 3.081764  | -1.774425 |
| H  | 3.052554  | 3.296238  | 2.548211  |
| C  | 3.643785  | 4.801489  | 0.328737  |
| H  | 3.711097  | 5.167049  | -0.707808 |
| H  | 2.954477  | 5.460895  | 0.884757  |
| H  | 4.640934  | 4.906621  | 0.792705  |
| I  | 3.718555  | -2.084046 | -0.341922 |

### IMB3-B6

Lowest frequency = 17.47 cm<sup>-1</sup>

Charge = 0, Multiplicity = 1

85

|   |           |           |           |
|---|-----------|-----------|-----------|
| O | -0.198969 | -0.140459 | 1.380639  |
| N | 1.554248  | -1.157624 | 2.291450  |
| C | 0.838955  | -0.846161 | 1.201983  |
| C | 1.122891  | -1.327199 | -0.219757 |
| C | 1.248331  | -0.190626 | -1.420863 |
| C | 1.422384  | 1.266853  | -1.080193 |
| C | 1.108674  | 2.233823  | -2.051062 |
| H | 0.705780  | 1.922405  | -3.015886 |
| C | 1.283869  | 3.593592  | -1.775213 |
| H | 1.018448  | 4.332921  | -2.536880 |
| C | 1.764778  | 4.007853  | -0.527366 |
| H | 1.874469  | 5.073531  | -0.304220 |
| C | 2.096023  | 3.048449  | 0.437641  |
| H | 2.481851  | 3.355977  | 1.414320  |

|    |           |           |           |
|----|-----------|-----------|-----------|
| C  | 1.938386  | 1.688413  | 0.157873  |
| H  | 2.261543  | 0.960969  | 0.904193  |
| C  | 1.039769  | -0.647854 | 3.589416  |
| H  | -0.049611 | -0.802303 | 3.602281  |
| H  | 1.490824  | -1.283946 | 4.366731  |
| C  | 1.381118  | 0.826355  | 3.819332  |
| H  | 1.045768  | 1.124422  | 4.827061  |
| H  | 2.470202  | 0.997202  | 3.756834  |
| H  | 0.870853  | 1.470109  | 3.086695  |
| C  | 2.814901  | -1.909821 | 2.344785  |
| H  | 3.244188  | -1.932885 | 1.340402  |
| H  | 3.511952  | -1.322710 | 2.968472  |
| C  | 2.637630  | -3.322446 | 2.903776  |
| H  | 2.256863  | -3.311718 | 3.939218  |
| H  | 1.938757  | -3.904667 | 2.281543  |
| H  | 3.613566  | -3.836453 | 2.906796  |
| B  | -0.352898 | -0.955705 | -1.164297 |
| B  | -0.421127 | -2.245914 | -2.354341 |
| H  | -1.485651 | -2.576565 | -2.782598 |
| B  | 0.104819  | -2.624960 | -0.692365 |
| H  | -0.495322 | -3.166320 | 0.183222  |
| B  | 0.922618  | -3.388060 | -2.071485 |
| H  | 0.806388  | -4.566002 | -2.255719 |
| B  | 2.454531  | -2.528793 | -2.353940 |
| H  | 3.453508  | -3.056965 | -2.750126 |
| B  | 2.058814  | -0.849164 | -2.783230 |
| H  | 2.733019  | -0.087813 | -3.410137 |
| B  | 0.296627  | -0.673249 | -2.782195 |
| H  | -0.219072 | 0.167421  | -3.447483 |
| B  | 1.038032  | -2.178772 | -3.373845 |
| H  | 1.012055  | -2.453305 | -4.539156 |
| B  | 2.654770  | -1.238407 | -1.155218 |
| B  | 1.880486  | -2.783468 | -0.699277 |
| H  | 2.394212  | -3.469453 | 0.128972  |
| Pd | -1.646428 | 0.191291  | -0.086186 |
| O  | -2.568688 | 1.731624  | 1.411807  |
| C  | -1.771785 | 2.576531  | 0.927115  |
| O  | -1.034361 | 2.367479  | -0.079302 |
| C  | -1.576178 | 3.924618  | 1.656213  |
| F  | -0.534591 | 3.801342  | 2.531533  |
| F  | -1.269045 | 4.922098  | 0.804899  |
| F  | -2.658576 | 4.287844  | 2.362265  |
| C  | 4.078332  | -0.755066 | -0.684043 |
| C  | 4.984363  | -1.709338 | -0.166170 |
| C  | 4.589436  | 0.539291  | -0.928186 |
| C  | 6.303301  | -1.374002 | 0.159581  |
| H  | 4.658350  | -2.747769 | -0.036737 |
| C  | 5.908139  | 0.875591  | -0.604270 |
| H  | 3.956540  | 1.297650  | -1.394240 |
| C  | 6.787749  | -0.067215 | -0.037799 |
| H  | 6.973703  | -2.144671 | 0.557451  |
| H  | 6.265189  | 1.891658  | -0.808358 |
| C  | 8.199756  | 0.312563  | 0.341295  |
| H  | 8.853869  | -0.573214 | 0.400182  |
| H  | 8.634065  | 1.020178  | -0.385472 |
| H  | 8.219452  | 0.807865  | 1.330913  |

|   |           |           |           |
|---|-----------|-----------|-----------|
| C | -2.655041 | -1.462085 | 0.468963  |
| C | -2.849948 | -1.467602 | 1.855544  |
| C | -3.186816 | -2.477867 | -0.332592 |
| C | -3.554808 | -2.531335 | 2.444887  |
| H | -2.482896 | -0.645088 | 2.477101  |
| C | -3.887753 | -3.528547 | 0.274689  |
| H | -3.063116 | -2.462027 | -1.416390 |
| C | -4.079029 | -3.580320 | 1.669528  |
| H | -3.704150 | -2.531673 | 3.531304  |
| H | -4.299274 | -4.322820 | -0.359588 |
| I | -3.251696 | 0.600156  | -2.079955 |
| C | -4.850940 | -4.715995 | 2.302580  |
| H | -4.454135 | -5.696724 | 1.984253  |
| H | -4.806936 | -4.667891 | 3.403179  |
| H | -5.915606 | -4.684559 | 2.005273  |

### IMB3-B4

Lowest frequency = 15.78 cm<sup>-1</sup>

Charge = 0, Multiplicity = 1

85

|   |           |           |           |
|---|-----------|-----------|-----------|
| O | -0.113884 | -0.757698 | -1.109979 |
| N | 1.323477  | -2.446117 | -1.384635 |
| C | 0.791346  | -1.490874 | -0.609514 |
| C | 1.112855  | -1.200375 | 0.855383  |
| C | 2.615346  | -0.957138 | 1.534879  |
| C | 3.858530  | -1.148990 | 0.697835  |
| C | 4.934484  | -1.895465 | 1.219438  |
| H | 4.869043  | -2.304122 | 2.229179  |
| C | 6.082151  | -2.123763 | 0.451017  |
| H | 6.906005  | -2.705306 | 0.876893  |
| C | 6.175391  | -1.616222 | -0.852445 |
| H | 7.072842  | -1.797278 | -1.452751 |
| C | 5.109904  | -0.873106 | -1.377204 |
| H | 5.166080  | -0.463149 | -2.390817 |
| C | 3.962221  | -0.638844 | -0.610216 |
| H | 3.153238  | -0.049421 | -1.038993 |
| C | 0.790612  | -2.538039 | -2.770330 |
| H | 1.000325  | -3.563439 | -3.111464 |
| H | -0.300024 | -2.408743 | -2.727453 |
| C | 1.438217  | -1.511878 | -3.701339 |
| H | 1.053977  | -1.649861 | -4.725908 |
| H | 1.197827  | -0.486383 | -3.379453 |
| H | 2.535685  | -1.629739 | -3.723577 |
| C | 2.340789  | -3.454167 | -1.038301 |
| H | 3.043206  | -3.494855 | -1.888468 |
| H | 2.917682  | -3.103407 | -0.177920 |
| C | 1.720665  | -4.825961 | -0.764140 |
| H | 1.021858  | -4.776307 | 0.086757  |
| H | 1.169746  | -5.209638 | -1.639204 |
| H | 2.520417  | -5.545478 | -0.520461 |
| B | 1.717713  | -2.379829 | 1.967873  |
| B | 0.937077  | -2.032138 | 3.504070  |
| H | 0.736345  | -2.934988 | 4.264045  |
| B | 0.010543  | -1.882720 | 1.998447  |
| H | -0.785368 | -2.654619 | 1.565054  |
| B | -0.179041 | -0.656617 | 3.275559  |



|    |           |           |           |
|----|-----------|-----------|-----------|
| H  | -1.199336 | -0.568217 | 3.887575  |
| B  | 0.788714  | 0.768521  | 2.796025  |
| H  | 0.507078  | 1.894473  | 3.082163  |
| B  | 2.495254  | 0.256543  | 2.733285  |
| H  | 3.461304  | 0.938341  | 2.887817  |
| B  | 2.580503  | -1.447483 | 3.185813  |
| H  | 3.576978  | -1.895850 | 3.662176  |
| B  | 1.420733  | -0.386182 | 3.999304  |
| H  | 1.586535  | -0.079390 | 5.145068  |
| B  | 1.561050  | 0.476872  | 1.217158  |
| B  | -0.098617 | -0.151540 | 1.567626  |
| Pd | -1.606721 | 0.048884  | 0.183618  |
| O  | -2.367210 | -2.103899 | -0.054535 |
| C  | -3.027320 | -1.745527 | -1.073727 |
| O  | -3.132247 | -0.558376 | -1.478858 |
| C  | -3.651767 | -2.867233 | -1.933872 |
| F  | -4.698444 | -2.437306 | -2.655526 |
| F  | -2.704927 | -3.319778 | -2.813125 |
| F  | -4.045904 | -3.917950 | -1.194026 |
| H  | 2.096661  | -3.429104 | 1.565784  |
| C  | 1.994410  | 1.626744  | 0.223865  |
| C  | 2.750557  | 2.692710  | 0.763710  |
| C  | 1.632790  | 1.738854  | -1.136803 |
| C  | 3.130619  | 3.794858  | -0.008884 |
| H  | 3.038647  | 2.670541  | 1.817689  |
| C  | 2.016404  | 2.837727  | -1.911086 |
| H  | 1.008911  | 0.974520  | -1.599771 |
| C  | 2.773880  | 3.889944  | -1.366043 |
| H  | 3.710339  | 4.600328  | 0.457124  |
| H  | 1.697722  | 2.888073  | -2.958048 |
| C  | 3.169797  | 5.089844  | -2.193265 |
| H  | 2.829257  | 4.989028  | -3.236792 |
| H  | 2.729906  | 6.015529  | -1.779996 |
| H  | 4.266438  | 5.226810  | -2.199899 |
| C  | -1.295137 | 1.983099  | -0.246348 |
| C  | -0.811689 | 3.004839  | 0.572309  |
| C  | -1.623307 | 2.222849  | -1.588233 |
| C  | -0.580665 | 4.270202  | 0.011379  |
| H  | -0.595716 | 2.828746  | 1.626927  |
| C  | -1.389931 | 3.496484  | -2.126999 |
| H  | -2.053034 | 1.429820  | -2.209129 |
| C  | -0.855248 | 4.536170  | -1.341527 |
| H  | -0.174026 | 5.064281  | 0.648025  |
| H  | -1.632501 | 3.678837  | -3.180942 |
| C  | -0.603681 | 5.902173  | -1.938277 |
| H  | -0.069757 | 6.556553  | -1.229628 |
| H  | -0.000021 | 5.830369  | -2.860819 |
| H  | -1.553135 | 6.400304  | -2.208950 |
| I  | -3.348285 | 0.868894  | 1.907960  |

### TS1-B3

Lowest frequency = -821.43 cm<sup>-1</sup>

Charge = 1, Multiplicity = 1

66

|   |          |           |           |
|---|----------|-----------|-----------|
| O | 1.042245 | 0.374216  | 0.336472  |
| N | 2.969081 | -0.434921 | -0.452845 |

|    |           |           |           |
|----|-----------|-----------|-----------|
| C  | 1.643776  | -0.504387 | -0.378265 |
| C  | 0.756215  | -1.521656 | -1.056499 |
| C  | -0.129319 | -2.500492 | 0.008115  |
| C  | 0.158985  | -2.388717 | 1.485535  |
| C  | -0.893183 | -2.014308 | 2.367775  |
| H  | -1.919970 | -1.943681 | 1.998071  |
| C  | -0.641642 | -1.869746 | 3.758792  |
| H  | -1.481221 | -1.711605 | 4.445473  |
| C  | 0.665151  | -2.089341 | 4.267462  |
| H  | 0.856618  | -1.985121 | 5.339383  |
| C  | 1.684250  | -2.482212 | 3.395957  |
| H  | 2.688453  | -2.678465 | 3.782470  |
| C  | 1.431369  | -2.636744 | 2.020383  |
| H  | 2.244287  | -2.953436 | 1.364353  |
| C  | 3.624568  | 0.682521  | 0.290543  |
| H  | 3.021928  | 1.590179  | 0.138731  |
| H  | 4.604985  | 0.831995  | -0.184616 |
| C  | 3.774515  | 0.377153  | 1.781502  |
| H  | 4.270401  | 1.230034  | 2.272947  |
| H  | 4.388925  | -0.523755 | 1.949742  |
| H  | 2.789893  | 0.236528  | 2.256013  |
| C  | 3.874244  | -1.328429 | -1.212213 |
| H  | 3.339239  | -2.255916 | -1.442243 |
| H  | 4.700001  | -1.583176 | -0.525698 |
| C  | 4.404368  | -0.670053 | -2.487544 |
| H  | 4.981178  | 0.244122  | -2.271213 |
| H  | 3.579395  | -0.411571 | -3.170921 |
| H  | 5.073680  | -1.378776 | -3.002156 |
| B  | -0.951948 | -1.140429 | -0.734935 |
| B  | -1.816138 | -1.814438 | -2.109411 |
| H  | -2.835561 | -1.287033 | -2.445634 |
| B  | -0.240426 | -1.010894 | -2.365816 |
| H  | -0.032939 | 0.083975  | -2.798723 |
| B  | -0.623665 | -2.519092 | -3.243193 |
| H  | -0.777987 | -2.500949 | -4.427763 |
| B  | 0.206512  | -3.871915 | -2.406570 |
| H  | 0.646267  | -4.832902 | -2.964112 |
| B  | -0.477207 | -3.997931 | -0.762812 |
| H  | -0.491679 | -4.956734 | -0.052963 |
| B  | -1.718872 | -2.740923 | -0.589685 |
| H  | -2.586267 | -2.890159 | 0.210690  |
| B  | -1.536086 | -3.584499 | -2.143337 |
| H  | -2.376010 | -4.350927 | -2.509811 |
| B  | 1.083796  | -3.200141 | -1.027523 |
| H  | 2.093780  | -3.576237 | -0.525949 |
| B  | 0.997708  | -2.287631 | -2.557358 |
| H  | 2.004322  | -2.047058 | -3.145492 |
| H  | -1.972446 | -0.551311 | 0.325987  |
| Pd | -0.920559 | 0.806295  | 0.094089  |
| O  | 0.224940  | 2.305399  | 2.704391  |
| C  | 0.196071  | 3.009843  | 1.660053  |
| O  | -0.342826 | 2.765315  | 0.542556  |
| C  | 1.020500  | 4.323860  | 1.719665  |
| F  | 2.298086  | 4.000596  | 1.367535  |
| F  | 1.042399  | 4.836322  | 2.952954  |
| F  | 0.567258  | 5.241807  | 0.864363  |

|    |           |           |           |
|----|-----------|-----------|-----------|
| O  | -2.837268 | 1.425235  | -0.154820 |
| C  | -3.675419 | 0.568061  | 0.273794  |
| O  | -3.374444 | -0.555473 | 0.748015  |
| C  | -5.174607 | 0.933605  | 0.114072  |
| F  | -5.892521 | 0.371453  | 1.093345  |
| F  | -5.589046 | 0.448635  | -1.070953 |
| F  | -5.353472 | 2.255880  | 0.137862  |
| Ag | -0.405733 | 0.272149  | 2.873182  |

#### TS1-B4

Lowest frequency = -669.46 cm<sup>-1</sup>

Charge = 1, Multiplicity = 1

66

|   |           |           |           |
|---|-----------|-----------|-----------|
| O | -0.239527 | 1.107893  | 0.519985  |
| N | -2.216283 | 1.133549  | 1.576061  |
| C | -1.291021 | 0.474810  | 0.887460  |
| C | -1.321664 | -0.992649 | 0.478514  |
| C | -2.497633 | -1.664263 | -0.598769 |
| C | -3.734789 | -0.859981 | -0.885678 |
| C | -4.992371 | -1.392839 | -0.533749 |
| H | -5.058409 | -2.387277 | -0.085567 |
| C | -6.158481 | -0.653090 | -0.759644 |
| H | -7.128909 | -1.080952 | -0.490697 |
| C | -6.083483 | 0.627709  | -1.326596 |
| H | -6.996331 | 1.205486  | -1.500970 |
| C | -4.835287 | 1.161762  | -1.677765 |
| H | -4.768686 | 2.156209  | -2.129536 |
| C | -3.665486 | 0.422303  | -1.464455 |
| H | -2.702673 | 0.850552  | -1.751604 |
| C | -1.954780 | 2.574435  | 1.859387  |
| H | -2.534007 | 2.815669  | 2.763824  |
| H | -0.884612 | 2.683680  | 2.088487  |
| C | -2.358473 | 3.464947  | 0.683002  |
| H | -2.188895 | 4.520156  | 0.952931  |
| H | -1.749270 | 3.236830  | -0.206541 |
| H | -3.425654 | 3.339513  | 0.433125  |
| C | -3.493535 | 0.597470  | 2.091941  |
| H | -4.237708 | 1.397411  | 1.946252  |
| H | -3.807340 | -0.237972 | 1.457335  |
| C | -3.396340 | 0.187350  | 3.561346  |
| H | -2.665784 | -0.627246 | 3.698213  |
| H | -3.098059 | 1.033687  | 4.202206  |
| H | -4.381772 | -0.168562 | 3.904486  |
| B | -2.315146 | -2.279469 | 1.024863  |
| B | -1.318322 | -3.736078 | 0.875302  |
| H | -1.481044 | -4.644856 | 1.632602  |
| B | -0.578675 | -2.217176 | 1.433726  |
| H | -0.275829 | -1.922079 | 2.549743  |
| B | 0.289248  | -3.257120 | 0.253126  |
| H | 1.296873  | -3.821167 | 0.552263  |
| B | 0.033804  | -2.551238 | -1.368784 |
| H | 0.864856  | -2.757598 | -2.281104 |
| B | -1.700013 | -2.630685 | -1.768967 |
| H | -2.165931 | -2.639612 | -2.866118 |
| B | -2.528558 | -3.354742 | -0.375878 |
| H | -3.571317 | -3.914029 | -0.511345 |

|    |           |           |           |
|----|-----------|-----------|-----------|
| B  | -0.922580 | -3.960498 | -0.859314 |
| H  | -0.794895 | -5.040329 | -1.352831 |
| B  | -0.982941 | -1.112109 | -1.205681 |
| H  | -0.966087 | -0.106708 | -1.840666 |
| B  | 0.265310  | -1.496143 | 0.052612  |
| H  | 1.638944  | -1.076973 | 0.958722  |
| Pd | 1.444177  | 0.178279  | -0.155799 |
| O  | 2.146606  | 0.897825  | -3.248852 |
| C  | 2.279772  | 1.859852  | -2.445380 |
| O  | 2.054733  | 1.904969  | -1.199578 |
| C  | 2.716773  | 3.215804  | -3.067457 |
| F  | 1.609976  | 3.974746  | -3.242358 |
| F  | 3.556759  | 3.867449  | -2.251112 |
| F  | 3.307645  | 3.041047  | -4.253462 |
| O  | 3.192349  | -0.781259 | -0.627295 |
| C  | 3.534620  | -1.585277 | 0.318430  |
| O  | 2.887001  | -1.791605 | 1.363253  |
| C  | 4.810282  | -2.413634 | 0.023506  |
| F  | 5.314172  | -2.937837 | 1.138388  |
| F  | 4.439428  | -3.417726 | -0.808040 |
| F  | 5.738986  | -1.669706 | -0.584439 |
| H  | -3.182415 | -2.083106 | 1.809419  |
| Ag | 1.509698  | -1.081025 | -2.737373 |

### TS1a-B3

Lowest frequency = -817.84 cm<sup>-1</sup>

Charge = 0, Multiplicity = 1

65

|   |           |           |           |
|---|-----------|-----------|-----------|
| O | 1.253467  | 0.131692  | 0.574072  |
| N | 3.100041  | -0.603965 | -0.459908 |
| C | 1.780723  | -0.647540 | -0.284371 |
| C | 0.826519  | -1.584283 | -1.006845 |
| C | -0.062067 | -2.545033 | 0.072939  |
| C | 0.305035  | -2.507893 | 1.535656  |
| C | -0.662524 | -2.109763 | 2.477554  |
| H | -1.674662 | -1.861116 | 2.152732  |
| C | -0.340138 | -2.039374 | 3.837444  |
| H | -1.105346 | -1.726244 | 4.554357  |
| C | 0.951741  | -2.360709 | 4.276298  |
| H | 1.204372  | -2.298203 | 5.339544  |
| C | 1.916467  | -2.766787 | 3.344770  |
| H | 2.927383  | -3.026183 | 3.674931  |
| C | 1.595312  | -2.844698 | 1.984173  |
| H | 2.358048  | -3.164546 | 1.271400  |
| C | 3.844576  | 0.441443  | 0.293567  |
| H | 3.265592  | 1.372447  | 0.220333  |
| H | 4.792223  | 0.588151  | -0.246962 |
| C | 4.095099  | 0.043061  | 1.747808  |
| H | 4.664668  | 0.844100  | 2.248133  |
| H | 4.680435  | -0.891054 | 1.815281  |
| H | 3.142584  | -0.093254 | 2.283266  |
| C | 3.895485  | -1.441248 | -1.375193 |
| H | 3.328205  | -2.350441 | -1.604980 |
| H | 4.796290  | -1.748885 | -0.815775 |
| C | 4.272689  | -0.691128 | -2.655099 |
| H | 4.882734  | 0.201234  | -2.437996 |

|    |           |           |           |
|----|-----------|-----------|-----------|
| H  | 3.369452  | -0.365045 | -3.194849 |
| H  | 4.857147  | -1.358029 | -3.310797 |
| B  | -0.824298 | -1.104571 | -0.588244 |
| B  | -1.794587 | -1.687143 | -1.939509 |
| H  | -2.796624 | -1.094451 | -2.220743 |
| B  | -0.184994 | -0.978796 | -2.257226 |
| H  | 0.068981  | 0.110701  | -2.674362 |
| B  | -0.708298 | -2.432439 | -3.149371 |
| H  | -0.920511 | -2.374030 | -4.326113 |
| B  | 0.070968  | -3.857246 | -2.391380 |
| H  | 0.420143  | -4.828350 | -2.998453 |
| B  | -0.539328 | -3.986091 | -0.722612 |
| H  | -0.584446 | -4.969872 | -0.047138 |
| B  | -1.685662 | -2.656618 | -0.451194 |
| H  | -2.529587 | -2.775324 | 0.381015  |
| B  | -1.634016 | -3.467213 | -2.033456 |
| H  | -2.536994 | -4.170980 | -2.383832 |
| B  | 1.054426  | -3.278915 | -1.042507 |
| H  | 2.067977  | -3.733348 | -0.616366 |
| B  | 0.952546  | -2.322378 | -2.540232 |
| H  | 1.938819  | -2.143292 | -3.183055 |
| H  | -1.832496 | -0.370396 | 0.663922  |
| Pd | -0.623642 | 0.796399  | 0.168210  |
| O  | 1.514282  | 2.245606  | -1.284354 |
| C  | 1.081097  | 2.966497  | -0.378824 |
| O  | 0.091009  | 2.752077  | 0.414699  |
| C  | 1.863736  | 4.267305  | -0.052178 |
| F  | 2.358132  | 4.840014  | -1.165115 |
| F  | 2.927916  | 3.938373  | 0.742901  |
| F  | 1.137774  | 5.186540  | 0.605991  |
| O  | -2.504233 | 1.508063  | -0.262973 |
| C  | -3.389037 | 0.776956  | 0.267601  |
| O  | -3.163105 | -0.267378 | 0.944551  |
| C  | -4.863144 | 1.144538  | -0.006394 |
| F  | -5.630932 | 0.858271  | 1.057459  |
| F  | -5.296053 | 0.413216  | -1.056139 |
| F  | -5.000360 | 2.442288  | -0.301156 |

#### TS1a-B4

Lowest frequency = -875.55 cm<sup>-1</sup>

Charge = 0, Multiplicity = 1

65

|   |           |           |           |
|---|-----------|-----------|-----------|
| O | -0.363737 | 1.052225  | 0.202486  |
| N | -2.232132 | 1.125118  | 1.410814  |
| C | -1.356123 | 0.426084  | 0.685040  |
| C | -1.357717 | -1.066045 | 0.388821  |
| C | -2.504264 | -1.806956 | -0.598013 |
| C | -3.729764 | -1.004154 | -0.952419 |
| C | -5.004953 | -1.510895 | -0.633170 |
| H | -5.094076 | -2.495908 | -0.168917 |
| C | -6.153276 | -0.757649 | -0.904011 |
| H | -7.137523 | -1.166598 | -0.654822 |
| C | -6.043508 | 0.513926  | -1.485367 |
| H | -6.941910 | 1.104403  | -1.691540 |
| C | -4.777280 | 1.022206  | -1.806455 |
| H | -4.678720 | 2.011012  | -2.265218 |

|    |           |           |           |
|----|-----------|-----------|-----------|
| C  | -3.625986 | 0.267257  | -1.548634 |
| H  | -2.646805 | 0.674347  | -1.810485 |
| C  | -1.898208 | 2.562105  | 1.633418  |
| H  | -2.404821 | 2.849122  | 2.568833  |
| H  | -0.808068 | 2.637085  | 1.774127  |
| C  | -2.343372 | 3.442940  | 0.464819  |
| H  | -2.098410 | 4.493805  | 0.690036  |
| H  | -1.801665 | 3.166143  | -0.452925 |
| H  | -3.430406 | 3.365358  | 0.286675  |
| C  | -3.513844 | 0.656941  | 1.961950  |
| H  | -4.236991 | 1.473398  | 1.795623  |
| H  | -3.865602 | -0.194920 | 1.368746  |
| C  | -3.415084 | 0.303480  | 3.446683  |
| H  | -2.706573 | -0.525816 | 3.606477  |
| H  | -3.078584 | 1.166207  | 4.045863  |
| H  | -4.405967 | -0.007427 | 3.818338  |
| B  | -2.344109 | -2.286011 | 1.068803  |
| B  | -1.357709 | -3.746103 | 1.053384  |
| H  | -1.530910 | -4.574772 | 1.899494  |
| B  | -0.603771 | -2.179389 | 1.446435  |
| H  | -0.301099 | -1.776137 | 2.530061  |
| B  | 0.245569  | -3.335444 | 0.378439  |
| H  | 1.242316  | -3.879384 | 0.749601  |
| B  | 0.017726  | -2.799144 | -1.308689 |
| H  | 0.836929  | -2.930937 | -2.170463 |
| B  | -1.726150 | -2.889354 | -1.680888 |
| H  | -2.225001 | -3.001798 | -2.760010 |
| B  | -2.566714 | -3.474699 | -0.227073 |
| H  | -3.621040 | -4.027858 | -0.309882 |
| B  | -0.971496 | -4.132773 | -0.650757 |
| H  | -0.867311 | -5.262831 | -1.031820 |
| B  | -0.972833 | -1.338687 | -1.280780 |
| H  | -0.967165 | -0.406740 | -2.017977 |
| B  | 0.257386  | -1.592135 | -0.013764 |
| H  | 1.665626  | -1.234709 | 0.781180  |
| Pd | 1.395337  | 0.161840  | -0.252952 |
| O  | 1.609185  | 2.750757  | 1.269116  |
| C  | 1.834455  | 2.932303  | 0.072740  |
| O  | 2.006991  | 2.055777  | -0.861927 |
| C  | 1.828383  | 4.388533  | -0.469186 |
| F  | 2.204859  | 5.270639  | 0.474722  |
| F  | 2.614512  | 4.566768  | -1.546222 |
| F  | 0.550729  | 4.710847  | -0.837614 |
| O  | 3.228998  | -0.644766 | -0.679106 |
| C  | 3.567747  | -1.466029 | 0.225681  |
| O  | 2.855244  | -1.808509 | 1.208070  |
| C  | 4.936358  | -2.161680 | 0.060635  |
| F  | 5.532353  | -2.326495 | 1.252545  |
| F  | 4.733236  | -3.379746 | -0.487820 |
| F  | 5.754758  | -1.464656 | -0.737163 |
| H  | -3.215135 | -2.001086 | 1.823206  |

### TS2-B6

Lowest frequency = -802.10 cm<sup>-1</sup>

Charge = 1, Multiplicity = 1

79

|    |           |           |           |
|----|-----------|-----------|-----------|
| O  | 0.376445  | 1.290307  | 0.672795  |
| N  | -1.545293 | 2.199312  | 0.022400  |
| C  | -0.719767 | 1.153782  | 0.019310  |
| C  | -0.894017 | -0.149555 | -0.746951 |
| C  | -1.086852 | -1.633879 | 0.022956  |
| C  | -1.311090 | -1.753493 | 1.510619  |
| C  | -1.465446 | -0.630663 | 2.363131  |
| H  | -1.661458 | 0.360218  | 1.950405  |
| C  | -1.554982 | -0.804048 | 3.771889  |
| H  | -1.813322 | 0.053060  | 4.404880  |
| C  | -1.491272 | -2.105249 | 4.328921  |
| H  | -1.560291 | -2.238371 | 5.412338  |
| C  | -1.388957 | -3.207099 | 3.477531  |
| H  | -1.366568 | -4.219424 | 3.890614  |
| C  | -1.303976 | -3.033668 | 2.085593  |
| H  | -1.208140 | -3.910878 | 1.444038  |
| C  | -1.114522 | 3.388945  | 0.814406  |
| H  | -1.698766 | 4.236572  | 0.429284  |
| H  | -0.050396 | 3.573413  | 0.602870  |
| C  | -1.351429 | 3.203651  | 2.314352  |
| H  | -1.100712 | 4.139471  | 2.840069  |
| H  | -0.705050 | 2.408065  | 2.722007  |
| H  | -2.407277 | 2.963102  | 2.526616  |
| C  | -2.822930 | 2.342664  | -0.706459 |
| H  | -3.565305 | 2.694057  | 0.030871  |
| H  | -3.149323 | 1.351258  | -1.029876 |
| C  | -2.721672 | 3.306174  | -1.889708 |
| H  | -1.966439 | 2.964916  | -2.616098 |
| H  | -2.468982 | 4.333013  | -1.577453 |
| H  | -3.700214 | 3.340084  | -2.396367 |
| B  | -2.371535 | -1.094610 | -1.058749 |
| B  | -1.980442 | -1.907268 | -2.599833 |
| H  | -2.891690 | -2.167757 | -3.327690 |
| B  | -1.448433 | -0.237440 | -2.350693 |
| H  | -1.928652 | 0.745723  | -2.821380 |
| B  | -0.371076 | -1.391568 | -3.178893 |
| H  | -0.122970 | -1.253107 | -4.339752 |
| B  | 0.851355  | -1.957650 | -1.994345 |
| H  | 1.981781  | -2.237748 | -2.263401 |
| B  | -0.024658 | -2.811332 | -0.709584 |
| H  | 0.420929  | -3.651768 | 0.006202  |
| B  | -1.757603 | -2.773956 | -1.066241 |
| H  | -2.493879 | -3.583508 | -0.589754 |
| B  | -0.569456 | -2.973251 | -2.385499 |
| H  | -0.474647 | -4.022200 | -2.950153 |
| B  | 0.534193  | -1.154422 | -0.457188 |
| H  | 1.153916  | -1.563604 | 1.019377  |
| B  | 0.304698  | -0.264367 | -1.986470 |
| H  | 0.954680  | 0.722082  | -2.167532 |
| Pd | 1.859107  | -0.071537 | 0.741340  |
| O  | 3.364471  | -1.430631 | 0.983898  |
| C  | 2.920973  | -2.451229 | 1.600210  |
| O  | 1.713419  | -2.647811 | 1.901678  |
| C  | 3.942976  | -3.547185 | 1.994768  |
| F  | 3.646747  | -4.669989 | 1.317425  |
| F  | 3.831978  | -3.789342 | 3.312624  |

|    |           |           |           |
|----|-----------|-----------|-----------|
| F  | 5.193853  | -3.181900 | 1.719323  |
| C  | -3.833703 | -0.735715 | -0.619906 |
| C  | -4.726529 | -0.330056 | -1.644072 |
| C  | -4.359021 | -0.827741 | 0.686466  |
| C  | -6.055269 | 0.000585  | -1.368036 |
| H  | -4.370371 | -0.268238 | -2.677796 |
| C  | -5.691563 | -0.495488 | 0.961928  |
| H  | -3.736982 | -1.182547 | 1.510875  |
| C  | -6.566308 | -0.069101 | -0.055246 |
| H  | -6.713161 | 0.310689  | -2.187504 |
| H  | -6.063953 | -0.580101 | 1.989041  |
| C  | -8.010055 | 0.259525  | 0.235048  |
| H  | -8.347601 | 1.134088  | -0.346405 |
| H  | -8.661008 | -0.589213 | -0.046688 |
| H  | -8.172244 | 0.463549  | 1.305712  |
| Ag | 0.673949  | -0.211681 | 3.377066  |
| O  | 3.134822  | 1.368861  | 1.584473  |
| C  | 3.205237  | 1.434534  | 2.844778  |
| O  | 2.524851  | 0.816617  | 3.709911  |
| C  | 4.227510  | 2.461834  | 3.405113  |
| F  | 4.742311  | 2.038794  | 4.566203  |
| F  | 5.222505  | 2.688218  | 2.541226  |
| F  | 3.568873  | 3.624793  | 3.622227  |

#### TS2-B4

Lowest frequency = -828.67 cm<sup>-1</sup>

Charge = 1, Multiplicity = 1

79

|   |           |           |           |
|---|-----------|-----------|-----------|
| O | -0.289538 | 1.258080  | 0.057084  |
| N | -2.234915 | 2.264852  | -0.318887 |
| C | -1.549926 | 1.288672  | 0.276612  |
| C | -2.038275 | 0.233626  | 1.260345  |
| C | -3.567177 | -0.645464 | 1.385890  |
| C | -4.757275 | -0.412918 | 0.496189  |
| C | -4.840721 | -0.957305 | -0.798923 |
| H | -4.024357 | -1.563768 | -1.191615 |
| C | -5.981719 | -0.745038 | -1.583493 |
| H | -6.031771 | -1.176901 | -2.587821 |
| C | -7.058953 | -0.002173 | -1.081765 |
| H | -7.950967 | 0.157551  | -1.695325 |
| C | -6.996425 | 0.517426  | 0.220324  |
| H | -7.841233 | 1.078370  | 0.631463  |
| C | -5.857793 | 0.312992  | 1.005322  |
| H | -5.822193 | 0.718083  | 2.019686  |
| C | -1.457349 | 3.190698  | -1.195430 |
| H | -0.531772 | 3.463408  | -0.666148 |
| H | -2.075736 | 4.093440  | -1.302116 |
| C | -1.145544 | 2.584272  | -2.564389 |
| H | -0.655149 | 3.344976  | -3.193657 |
| H | -2.065906 | 2.256530  | -3.077537 |
| H | -0.454569 | 1.730071  | -2.471119 |
| C | -3.666995 | 2.579246  | -0.163400 |
| H | -4.162455 | 1.713172  | 0.280958  |
| H | -4.078999 | 2.690519  | -1.181373 |
| C | -3.913513 | 3.837215  | 0.671010  |
| H | -3.480465 | 4.739235  | 0.208109  |



|    |           |           |           |
|----|-----------|-----------|-----------|
| H  | -3.493516 | 3.730010  | 1.684455  |
| H  | -5.001193 | 3.994720  | 0.759373  |
| B  | -2.111327 | -1.437056 | 0.792892  |
| B  | -1.482090 | -2.321821 | 2.237872  |
| H  | -0.906373 | -3.353968 | 2.070323  |
| B  | -0.738009 | -0.791958 | 1.767719  |
| H  | 0.314993  | -1.570695 | 0.771037  |
| B  | -1.020737 | -1.130224 | 3.484990  |
| H  | -0.089758 | -1.293831 | 4.216584  |
| B  | -2.510232 | -0.252627 | 3.963202  |
| H  | -2.684944 | 0.222081  | 5.045662  |
| B  | -3.860963 | -0.946785 | 3.042347  |
| H  | -5.004467 | -0.950858 | 3.377936  |
| B  | -3.225884 | -2.208970 | 1.961044  |
| H  | -3.924214 | -3.077919 | 1.533707  |
| B  | -2.560795 | -2.008436 | 3.614706  |
| H  | -2.781509 | -2.832547 | 4.451429  |
| B  | -3.134483 | 0.591394  | 2.527855  |
| H  | -3.712998 | 1.628826  | 2.484824  |
| B  | -1.368713 | 0.489576  | 2.827751  |
| H  | -0.787158 | 1.523083  | 2.974823  |
| Pd | 1.014448  | -0.042837 | 0.887988  |
| O  | 2.630190  | 1.124493  | 0.205794  |
| C  | 3.177125  | 0.795991  | -0.884715 |
| O  | 2.812408  | -0.073285 | -1.724149 |
| C  | 4.438223  | 1.613073  | -1.278093 |
| F  | 5.325657  | 0.842067  | -1.920433 |
| F  | 5.027841  | 2.159367  | -0.209077 |
| F  | 4.048086  | 2.607111  | -2.111135 |
| Ag | 0.861673  | -0.954006 | -1.864675 |
| O  | 1.058329  | -2.840020 | 0.490019  |
| C  | 2.092659  | -2.548825 | 1.146410  |
| O  | 2.379761  | -1.389530 | 1.585197  |
| C  | 3.082817  | -3.696424 | 1.463870  |
| F  | 4.198653  | -3.246439 | 2.037101  |
| F  | 2.477731  | -4.566813 | 2.291356  |
| F  | 3.398567  | -4.329610 | 0.320148  |
| C  | -1.804391 | -1.970046 | -0.661915 |
| C  | -1.637447 | -3.357347 | -0.841374 |
| C  | -1.518320 | -1.140892 | -1.780064 |
| C  | -1.174380 | -3.903776 | -2.047726 |
| H  | -1.845504 | -4.032364 | -0.006802 |
| C  | -1.044154 | -1.688653 | -3.005119 |
| H  | -1.765543 | -0.075502 | -1.755810 |
| C  | -0.848552 | -3.092528 | -3.147537 |
| H  | -1.049695 | -4.988607 | -2.127231 |
| H  | -0.953894 | -1.041971 | -3.887107 |
| C  | -0.367818 | -3.681073 | -4.449242 |
| H  | 0.114056  | -2.922531 | -5.086273 |
| H  | 0.347601  | -4.501154 | -4.273151 |
| H  | -1.219548 | -4.105045 | -5.012906 |

### TS2a-B6

Lowest frequency = -652.59 cm<sup>-1</sup>

Charge = 0, Multiplicity = 1

78

|    |           |           |           |
|----|-----------|-----------|-----------|
| O  | 0.200359  | 1.184047  | 0.519675  |
| N  | -1.497228 | 2.252731  | -0.453524 |
| C  | -0.792767 | 1.135918  | -0.277250 |
| C  | -1.033581 | -0.199274 | -0.977791 |
| C  | -1.112021 | -1.543006 | 0.014392  |
| C  | -1.192885 | -1.335932 | 1.508998  |
| C  | -1.885459 | -0.245601 | 2.068224  |
| H  | -2.422039 | 0.456246  | 1.426737  |
| C  | -1.920749 | -0.056011 | 3.453061  |
| H  | -2.463148 | 0.801257  | 3.863946  |
| C  | -1.268758 | -0.958080 | 4.304920  |
| H  | -1.293052 | -0.808726 | 5.389030  |
| C  | -0.585675 | -2.051802 | 3.757339  |
| H  | -0.070306 | -2.764088 | 4.408934  |
| C  | -0.544771 | -2.240499 | 2.370335  |
| H  | 0.005105  | -3.087186 | 1.957201  |
| C  | -0.990278 | 3.482001  | 0.216753  |
| H  | -1.449257 | 4.326621  | -0.319323 |
| H  | 0.094787  | 3.521951  | 0.048649  |
| C  | -1.337210 | 3.525904  | 1.704804  |
| H  | -0.961516 | 4.470749  | 2.131875  |
| H  | -0.858467 | 2.691663  | 2.240985  |
| H  | -2.428952 | 3.482136  | 1.867309  |
| C  | -2.707327 | 2.412295  | -1.271888 |
| H  | -3.430203 | 2.982622  | -0.662821 |
| H  | -3.146187 | 1.424856  | -1.434989 |
| C  | -2.423100 | 3.121292  | -2.597507 |
| H  | -1.686283 | 2.557479  | -3.191614 |
| H  | -2.032131 | 4.140473  | -2.441795 |
| H  | -3.359196 | 3.197663  | -3.175959 |
| B  | -2.525889 | -1.165188 | -0.990162 |
| B  | -2.317428 | -2.194136 | -2.422901 |
| H  | -3.312199 | -2.539146 | -2.992729 |
| B  | -1.772108 | -0.511106 | -2.481246 |
| H  | -2.316687 | 0.378805  | -3.055573 |
| B  | -0.790657 | -1.780450 | -3.249241 |
| H  | -0.682385 | -1.820859 | -4.440949 |
| B  | 0.561400  | -2.175481 | -2.146875 |
| H  | 1.652053  | -2.510837 | -2.508839 |
| B  | -0.152801 | -2.821770 | -0.652102 |
| H  | 0.372703  | -3.588558 | 0.088304  |
| B  | -1.909582 | -2.825495 | -0.809250 |
| H  | -2.570931 | -3.557783 | -0.136082 |
| B  | -0.882843 | -3.225335 | -2.213740 |
| H  | -0.841139 | -4.347842 | -2.628372 |
| B  | 0.442159  | -1.157858 | -0.717770 |
| H  | 1.574145  | -1.483650 | 0.660687  |
| B  | 0.005401  | -0.488554 | -2.320948 |
| H  | 0.619801  | 0.455109  | -2.718586 |
| Pd | 1.843751  | 0.074989  | 0.105706  |
| O  | 1.850291  | 2.666668  | -1.256924 |
| C  | 2.658093  | 2.724607  | -0.321719 |
| O  | 3.036729  | 1.778389  | 0.460299  |
| C  | 3.232381  | 4.117448  | 0.052067  |
| F  | 4.358108  | 4.061292  | 0.783209  |
| F  | 2.293917  | 4.782314  | 0.794116  |

|   |           |           |           |
|---|-----------|-----------|-----------|
| F | 3.478160  | 4.862403  | -1.041658 |
| O | 3.504272  | -1.041163 | -0.325781 |
| C | 3.440063  | -2.169066 | 0.256483  |
| O | 2.497117  | -2.569476 | 0.985141  |
| C | 4.590033  | -3.154649 | -0.047586 |
| F | 4.812443  | -3.970067 | 0.995743  |
| F | 5.728604  | -2.515194 | -0.343713 |
| F | 4.229867  | -3.909616 | -1.109608 |
| C | -3.960503 | -0.795228 | -0.452533 |
| C | -4.875633 | -0.142123 | -1.308988 |
| C | -4.467780 | -1.263600 | 0.780334  |
| C | -6.200397 | 0.098094  | -0.926840 |
| H | -4.554994 | 0.161015  | -2.312020 |
| C | -5.791565 | -1.025652 | 1.163865  |
| H | -3.824645 | -1.839010 | 1.451234  |
| C | -6.681396 | -0.324854 | 0.326451  |
| H | -6.878150 | 0.606950  | -1.621917 |
| H | -6.145362 | -1.404897 | 2.129528  |
| C | -8.100316 | -0.041172 | 0.759549  |
| H | -8.757482 | 0.141750  | -0.106726 |
| H | -8.517005 | -0.879151 | 1.343966  |
| H | -8.140047 | 0.858212  | 1.403384  |

#### TS2a-B4

Lowest frequency = -844.18 cm<sup>-1</sup>

Charge = 0, Multiplicity = 1

78

|   |          |           |           |
|---|----------|-----------|-----------|
| O | 0.018390 | 1.058923  | 0.676732  |
| N | 1.605411 | 2.257361  | -0.345554 |
| C | 0.883431 | 1.140403  | -0.255086 |
| C | 0.947328 | -0.089804 | -1.154059 |
| C | 2.297940 | -0.958144 | -1.533360 |
| C | 3.653958 | -0.434809 | -1.120414 |
| C | 4.730291 | -0.502021 | -2.026254 |
| H | 4.578158 | -0.943453 | -3.012734 |
| C | 5.989859 | -0.002435 | -1.673262 |
| H | 6.813215 | -0.065181 | -2.391768 |
| C | 6.194484 | 0.575563  | -0.412783 |
| H | 7.179444 | 0.966748  | -0.138411 |
| C | 5.128410 | 0.645194  | 0.494210  |
| H | 5.272612 | 1.086502  | 1.485520  |
| C | 3.869212 | 0.142203  | 0.147443  |
| H | 3.060035 | 0.196870  | 0.875890  |
| C | 1.332349 | 3.304858  | 0.675910  |
| H | 1.717523 | 4.246525  | 0.256380  |
| H | 0.243361 | 3.400126  | 0.776914  |
| C | 2.002376 | 2.983849  | 2.012307  |
| H | 1.782370 | 3.789664  | 2.732475  |
| H | 1.615191 | 2.038418  | 2.425667  |
| H | 3.098248 | 2.906334  | 1.903273  |
| C | 2.553030 | 2.637148  | -1.407552 |
| H | 3.390651 | 3.154440  | -0.910365 |
| H | 2.970909 | 1.732660  | -1.860868 |
| C | 1.882062 | 3.527919  | -2.455606 |
| H | 1.047215 | 2.996526  | -2.939854 |
| H | 1.475613 | 4.448359  | -2.005211 |

|    |           |           |           |
|----|-----------|-----------|-----------|
| H  | 2.621217  | 3.811191  | -3.223878 |
| B  | 1.447408  | -0.101211 | -2.801082 |
| B  | 0.424357  | -1.289190 | -3.599346 |
| H  | 0.177524  | -1.142846 | -4.761370 |
| B  | -0.275145 | -0.217127 | -2.364744 |
| H  | -0.950689 | 0.752883  | -2.534957 |
| B  | -0.727893 | -1.941987 | -2.398271 |
| H  | -1.845293 | -2.264748 | -2.684483 |
| B  | 0.206920  | -2.789472 | -1.135495 |
| H  | -0.196139 | -3.727545 | -0.516384 |
| B  | 1.929127  | -2.638101 | -1.545773 |
| H  | 2.808163  | -3.380026 | -1.227582 |
| B  | 2.061223  | -1.733684 | -3.058073 |
| H  | 3.002924  | -1.883430 | -3.773803 |
| B  | 0.722560  | -2.875819 | -2.837854 |
| H  | 0.696786  | -3.899232 | -3.458922 |
| B  | 1.217930  | -1.622832 | -0.260651 |
| B  | -0.407305 | -1.145061 | -0.841821 |
| H  | -1.499973 | -1.650801 | 0.391350  |
| Pd | -1.714563 | 0.083986  | 0.200298  |
| O  | -1.557909 | 2.874308  | -0.841585 |
| C  | -2.343193 | 2.834727  | 0.112653  |
| O  | -2.756161 | 1.813662  | 0.776302  |
| C  | -2.849122 | 4.185313  | 0.688948  |
| F  | -4.009404 | 4.088243  | 1.359563  |
| F  | -1.908235 | 4.658490  | 1.563691  |
| F  | -2.998097 | 5.112267  | -0.275819 |
| O  | -3.467815 | -0.872847 | -0.267481 |
| C  | -3.408292 | -2.094462 | 0.063696  |
| O  | -2.409028 | -2.667541 | 0.579132  |
| C  | -4.637688 | -2.964220 | -0.276736 |
| F  | -4.798247 | -3.943197 | 0.627606  |
| F  | -5.759832 | -2.234787 | -0.325004 |
| F  | -4.438205 | -3.529476 | -1.487785 |
| H  | 1.958723  | 0.860401  | -3.270341 |
| C  | 1.677905  | -1.754724 | 1.237979  |
| C  | 2.884375  | -2.425300 | 1.549617  |
| C  | 0.895422  | -1.309834 | 2.325526  |
| C  | 3.299712  | -2.610978 | 2.870791  |
| H  | 3.519699  | -2.799681 | 0.741494  |
| C  | 1.310972  | -1.496691 | 3.649454  |
| H  | -0.056192 | -0.804615 | 2.140920  |
| C  | 2.522268  | -2.146478 | 3.950060  |
| H  | 4.245223  | -3.128825 | 3.069515  |
| H  | 0.675508  | -1.132837 | 4.464951  |
| C  | 2.954557  | -2.376097 | 5.379059  |
| H  | 2.534415  | -1.612819 | 6.055178  |
| H  | 2.604559  | -3.363165 | 5.736788  |
| H  | 4.053625  | -2.363904 | 5.475001  |

### TS3-B6

Lowest frequency = -42.63 cm<sup>-1</sup>

Charge = 1, Multiplicity = 1

86

|   |          |           |          |
|---|----------|-----------|----------|
| O | 0.330778 | -1.169366 | 1.857555 |
| N | 2.475130 | -1.765312 | 1.955053 |

|    |           |           |           |
|----|-----------|-----------|-----------|
| C  | 1.407603  | -1.440080 | 1.227467  |
| C  | 1.315278  | -1.398580 | -0.290441 |
| C  | 0.679073  | -0.016994 | -0.939709 |
| C  | 0.522236  | 1.220191  | -0.088956 |
| C  | 1.376675  | 1.505667  | 0.989559  |
| H  | 2.198202  | 0.830158  | 1.231673  |
| C  | 1.225403  | 2.676556  | 1.747543  |
| H  | 1.907372  | 2.867071  | 2.580861  |
| C  | 0.215502  | 3.594361  | 1.441587  |
| H  | 0.094867  | 4.506498  | 2.032631  |
| C  | -0.639734 | 3.345985  | 0.347238  |
| H  | -1.380923 | 4.092783  | 0.044007  |
| C  | -0.489503 | 2.164017  | -0.422079 |
| H  | -1.079626 | 2.025982  | -1.330894 |
| C  | 2.293978  | -1.803151 | 3.434632  |
| H  | 3.078689  | -2.471706 | 3.819660  |
| H  | 1.311828  | -2.251512 | 3.645426  |
| C  | 2.392495  | -0.412649 | 4.064883  |
| H  | 2.312447  | -0.506521 | 5.159842  |
| H  | 1.567011  | 0.230162  | 3.721649  |
| H  | 3.357177  | 0.068664  | 3.827582  |
| C  | 3.824429  | -2.085575 | 1.457400  |
| H  | 4.533594  | -1.536414 | 2.099962  |
| H  | 3.925941  | -1.669036 | 0.451888  |
| C  | 4.113142  | -3.587096 | 1.474907  |
| H  | 3.404812  | -4.131843 | 0.829621  |
| H  | 4.053261  | -4.006137 | 2.493268  |
| H  | 5.133843  | -3.762437 | 1.096540  |
| B  | 2.343444  | -0.456870 | -1.427762 |
| B  | 2.105676  | -1.315532 | -2.957613 |
| H  | 3.007938  | -1.274872 | -3.740880 |
| B  | 2.233605  | -2.245619 | -1.452128 |
| H  | 3.171616  | -2.886007 | -1.095090 |
| B  | 1.073884  | -2.745818 | -2.708393 |
| H  | 1.235033  | -3.765963 | -3.311511 |
| B  | -0.545775 | -2.181334 | -2.221347 |
| H  | -1.548615 | -2.757910 | -2.519325 |
| B  | -0.497302 | -0.409539 | -2.134275 |
| H  | -1.422051 | 0.323259  | -2.297730 |
| B  | 1.126772  | 0.126753  | -2.591227 |
| H  | 1.286826  | 1.238833  | -2.995901 |
| B  | 0.388118  | -1.261624 | -3.422259 |
| H  | 0.034612  | -1.171553 | -4.560927 |
| B  | -0.446609 | -1.387227 | -0.657108 |
| B  | 0.596385  | -2.793767 | -0.992271 |
| H  | 0.482347  | -3.748661 | -0.281321 |
| Pd | -1.545799 | -1.344637 | 1.059818  |
| O  | -1.922013 | 1.073318  | 3.445040  |
| C  | -2.010777 | -0.119411 | 3.840957  |
| O  | -2.193586 | -1.171063 | 3.168645  |
| C  | -1.815493 | -0.357377 | 5.362143  |
| F  | -2.697727 | -1.255258 | 5.832311  |
| F  | -1.925900 | 0.769725  | 6.074065  |
| F  | -0.563599 | -0.859093 | 5.559075  |
| C  | 3.631312  | 0.383665  | -1.114151 |
| C  | 4.894212  | -0.254009 | -1.128471 |

|    |           |           |           |
|----|-----------|-----------|-----------|
| C  | 3.633447  | 1.794911  | -1.030885 |
| C  | 6.084395  | 0.467181  | -0.990208 |
| H  | 4.954037  | -1.336169 | -1.290056 |
| C  | 4.822598  | 2.517632  | -0.892316 |
| H  | 2.693992  | 2.349536  | -1.101245 |
| C  | 6.072716  | 1.869028  | -0.851100 |
| H  | 7.041867  | -0.064953 | -1.013648 |
| H  | 4.781678  | 3.611081  | -0.834997 |
| C  | 7.352749  | 2.648147  | -0.672939 |
| H  | 7.597104  | 2.750989  | 0.401500  |
| H  | 8.203480  | 2.140853  | -1.156861 |
| H  | 7.266209  | 3.665187  | -1.089491 |
| Ag | -2.014913 | 1.405234  | 1.277604  |
| I  | -3.744152 | -0.513251 | -0.274977 |
| C  | -3.317078 | -2.622288 | 0.732026  |
| C  | -2.935291 | -3.668245 | -0.121400 |
| C  | -4.056450 | -2.847000 | 1.910187  |
| C  | -3.199240 | -4.984616 | 0.286926  |
| H  | -2.439258 | -3.471614 | -1.071854 |
| C  | -4.312057 | -4.167474 | 2.277150  |
| H  | -4.387076 | -2.019197 | 2.538436  |
| C  | -3.885412 | -5.258733 | 1.483316  |
| H  | -2.872929 | -5.807219 | -0.358267 |
| H  | -4.863845 | -4.353394 | 3.205036  |
| C  | -4.177627 | -6.673751 | 1.913436  |
| H  | -5.254940 | -6.809559 | 2.114017  |
| H  | -3.870542 | -7.402429 | 1.147287  |
| H  | -3.642095 | -6.911547 | 2.850786  |

#### TS3-B4

Lowest frequency = -36.850 cm<sup>-1</sup>

Charge = 1, Multiplicity = 1

86

|   |          |           |           |
|---|----------|-----------|-----------|
| O | 0.591412 | 0.950527  | 1.273328  |
| N | 2.574791 | 1.375412  | 2.196122  |
| C | 1.831490 | 1.184303  | 1.104232  |
| C | 2.251006 | 1.258652  | -0.355509 |
| C | 3.608489 | 0.423917  | -1.205150 |
| C | 4.703325 | -0.358009 | -0.536060 |
| C | 5.881567 | 0.296786  | -0.114628 |
| H | 5.975453 | 1.379394  | -0.234220 |
| C | 6.949098 | -0.430397 | 0.421246  |
| H | 7.854725 | 0.095179  | 0.739271  |
| C | 6.867934 | -1.826889 | 0.526302  |
| H | 7.704272 | -2.396562 | 0.943163  |
| C | 5.724869 | -2.490623 | 0.060445  |
| H | 5.667726 | -3.582731 | 0.098805  |
| C | 4.655154 | -1.765418 | -0.477434 |
| H | 3.792834 | -2.300787 | -0.874977 |
| C | 1.868039 | 1.307295  | 3.508236  |
| H | 2.486794 | 1.881103  | 4.214798  |
| H | 0.897760 | 1.813777  | 3.397404  |
| C | 1.667037 | -0.129615 | 3.992121  |
| H | 1.198923 | -0.110827 | 4.989551  |
| H | 0.994878 | -0.679603 | 3.315831  |
| H | 2.629077 | -0.665408 | 4.070575  |

|    |           |           |           |
|----|-----------|-----------|-----------|
| C  | 4.014733  | 1.673562  | 2.249435  |
| H  | 4.438622  | 1.040514  | 3.047719  |
| H  | 4.470215  | 1.338039  | 1.313796  |
| C  | 4.301754  | 3.153000  | 2.509630  |
| H  | 3.884492  | 3.782941  | 1.706825  |
| H  | 3.880065  | 3.490089  | 3.471211  |
| H  | 5.392622  | 3.310638  | 2.545548  |
| B  | 3.557788  | 2.143317  | -1.021749 |
| B  | 2.963678  | 2.782753  | -2.572278 |
| H  | 3.355094  | 3.839015  | -2.972730 |
| B  | 1.863680  | 2.701264  | -1.176351 |
| H  | 1.531254  | 3.624260  | -0.492669 |
| B  | 1.289869  | 2.203074  | -2.794654 |
| H  | 0.480192  | 2.841107  | -3.399079 |
| B  | 1.323854  | 0.418919  | -2.837282 |
| H  | 0.555825  | -0.246270 | -3.467281 |
| B  | 3.012264  | -0.096563 | -2.695925 |
| H  | 3.448266  | -1.129126 | -3.106468 |
| B  | 4.026829  | 1.364347  | -2.551501 |
| H  | 5.183149  | 1.351775  | -2.844813 |
| B  | 2.611763  | 1.374759  | -3.625092 |
| H  | 2.749943  | 1.400293  | -4.812458 |
| B  | 1.935848  | -0.172537 | -1.260773 |
| B  | 0.825839  | 1.268788  | -1.363103 |
| Pd | -0.847610 | 1.154358  | -0.177972 |
| H  | 4.324466  | 2.686613  | -0.296385 |
| C  | 1.476569  | -1.518837 | -0.575376 |
| C  | 0.663211  | -2.422729 | -1.323271 |
| C  | 1.805528  | -1.899781 | 0.742179  |
| C  | 0.182409  | -3.623838 | -0.740911 |
| H  | 0.480931  | -2.230154 | -2.385764 |
| C  | 1.345071  | -3.094680 | 1.310447  |
| H  | 2.459807  | -1.262443 | 1.343252  |
| C  | 0.508662  | -3.971514 | 0.594752  |
| H  | -0.398771 | -4.321806 | -1.354318 |
| H  | 1.630794  | -3.345477 | 2.337287  |
| C  | -0.046522 | -5.220579 | 1.229310  |
| H  | 0.652713  | -5.637849 | 1.971873  |
| H  | -0.989731 | -4.986400 | 1.757886  |
| H  | -0.268350 | -5.993876 | 0.476128  |
| C  | -2.405555 | 2.451472  | -1.082855 |
| C  | -3.538191 | 2.595969  | -0.256897 |
| C  | -1.728743 | 3.557788  | -1.618943 |
| C  | -3.920758 | 3.885676  | 0.108062  |
| H  | -4.080048 | 1.726504  | 0.117160  |
| C  | -2.134583 | 4.840779  | -1.219218 |
| H  | -0.907471 | 3.430721  | -2.324494 |
| C  | -3.227303 | 5.029136  | -0.355249 |
| H  | -4.785911 | 4.006040  | 0.769163  |
| H  | -1.589925 | 5.706969  | -1.609858 |
| C  | -3.668806 | 6.408921  | 0.062967  |
| H  | -3.558184 | 6.537443  | 1.155179  |
| H  | -3.079203 | 7.192565  | -0.437749 |
| H  | -4.735352 | 6.569343  | -0.174466 |
| I  | -2.353904 | 0.448352  | -2.312610 |
| Ag | -1.324396 | -1.593495 | -0.325559 |

|   |           |           |          |
|---|-----------|-----------|----------|
| O | -2.239478 | 0.857431  | 1.525845 |
| C | -2.334225 | -0.241496 | 2.135982 |
| O | -2.108821 | -1.408629 | 1.717287 |
| C | -2.730480 | -0.113738 | 3.631044 |
| F | -1.638611 | 0.309618  | 4.328982 |
| F | -3.706411 | 0.793687  | 3.804183 |
| F | -3.128790 | -1.279022 | 4.156257 |

### TS3a-B6

Lowest frequency = -91.68 cm<sup>-1</sup>

Charge = 1, Multiplicity = 1

78

|   |           |           |           |
|---|-----------|-----------|-----------|
| O | -0.245810 | 1.088329  | -1.164459 |
| N | 1.534819  | 2.418273  | -0.917642 |
| C | 0.787838  | 1.404822  | -0.481670 |
| C | 1.004280  | 0.626720  | 0.808117  |
| C | 1.075877  | -1.042909 | 0.671639  |
| C | 1.152355  | -1.618761 | -0.723970 |
| C | 0.405150  | -2.768269 | -1.047222 |
| H | -0.201426 | -3.254831 | -0.281886 |
| C | 0.436087  | -3.291822 | -2.345602 |
| H | -0.148127 | -4.187567 | -2.576776 |
| C | 1.205810  | -2.672952 | -3.340086 |
| H | 1.228105  | -3.082833 | -4.354511 |
| C | 1.951818  | -1.528503 | -3.025136 |
| H | 2.565629  | -1.041922 | -3.789317 |
| C | 1.926184  | -1.005593 | -1.727789 |
| H | 2.533949  | -0.128099 | -1.496938 |
| C | 1.095286  | 3.097871  | -2.165934 |
| H | -0.001523 | 3.178948  | -2.136436 |
| H | 1.520991  | 4.112026  | -2.128171 |
| C | 1.554902  | 2.351529  | -3.419744 |
| H | 1.252149  | 2.920776  | -4.314206 |
| H | 2.653007  | 2.242803  | -3.440365 |
| H | 1.094495  | 1.352206  | -3.470062 |
| C | 2.782279  | 2.920822  | -0.314162 |
| H | 3.174224  | 2.149522  | 0.353949  |
| H | 3.510352  | 3.021245  | -1.137491 |
| C | 2.591748  | 4.251087  | 0.415181  |
| H | 2.252754  | 5.051136  | -0.264050 |
| H | 1.859793  | 4.152116  | 1.233148  |
| H | 3.556452  | 4.563506  | 0.848044  |
| B | -0.463095 | -0.317287 | 1.057762  |
| B | -0.675008 | -0.429810 | 2.787899  |
| H | -1.779676 | -0.511571 | 3.239547  |
| B | -0.077820 | 1.091532  | 2.063923  |
| H | -0.683961 | 2.106714  | 1.886264  |
| B | 0.660860  | 0.474951  | 3.558385  |
| H | 0.515919  | 1.071304  | 4.584908  |
| B | 2.194208  | -0.327366 | 3.127882  |
| H | 3.157072  | -0.329598 | 3.836464  |
| B | 1.814208  | -1.713700 | 2.073492  |
| H | 2.468723  | -2.697666 | 1.909323  |
| B | 0.060677  | -1.779030 | 1.874746  |
| H | -0.467501 | -2.813353 | 1.618287  |
| B | 0.739731  | -1.303148 | 3.441587  |



|    |           |           |           |
|----|-----------|-----------|-----------|
| H  | 0.650522  | -2.036737 | 4.381382  |
| B  | 2.483395  | -0.215160 | 1.380713  |
| B  | 1.699111  | 1.140835  | 2.268678  |
| H  | 2.243028  | 2.199495  | 2.305115  |
| Pd | -1.749351 | -0.133638 | -0.481743 |
| C  | 3.935911  | -0.202541 | 0.785454  |
| C  | 4.850259  | 0.789127  | 1.211580  |
| C  | 4.456709  | -1.256840 | 0.000754  |
| C  | 6.192325  | 0.768034  | 0.818175  |
| H  | 4.514344  | 1.584018  | 1.887316  |
| C  | 5.798505  | -1.279408 | -0.391558 |
| H  | 3.810736  | -2.085759 | -0.301485 |
| C  | 6.692849  | -0.262734 | -0.001077 |
| H  | 6.868587  | 1.556118  | 1.167693  |
| H  | 6.163377  | -2.111518 | -1.004010 |
| C  | 8.147801  | -0.309273 | -0.399597 |
| H  | 8.719460  | -0.941047 | 0.306177  |
| H  | 8.276367  | -0.743674 | -1.405059 |
| H  | 8.602786  | 0.694613  | -0.387741 |
| C  | -3.716952 | 0.460403  | 0.138632  |
| C  | -4.368167 | 0.841489  | -1.045251 |
| C  | -3.786757 | 1.214679  | 1.318024  |
| C  | -5.045712 | 2.073101  | -1.052950 |
| H  | -4.368665 | 0.203492  | -1.934611 |
| C  | -4.481915 | 2.428522  | 1.274021  |
| H  | -3.301171 | 0.876604  | 2.236077  |
| C  | -5.118952 | 2.880822  | 0.096872  |
| H  | -5.547769 | 2.388315  | -1.974093 |
| H  | -4.528745 | 3.036563  | 2.184417  |
| I  | -3.418708 | -1.953253 | 0.364601  |
| C  | -5.889933 | 4.178643  | 0.092664  |
| H  | -5.311067 | 4.987154  | 0.571274  |
| H  | -6.148368 | 4.491747  | -0.931124 |
| H  | -6.831671 | 4.071204  | 0.661824  |

#### TS3a-B4

Lowest frequency = -79.33 cm<sup>-1</sup>

Charge = 1, Multiplicity = 1

78

|   |           |           |           |
|---|-----------|-----------|-----------|
| O | -0.297385 | -0.474757 | 2.041406  |
| N | -2.516184 | -0.574431 | 2.372191  |
| C | -1.458395 | -0.741276 | 1.576549  |
| C | -1.437361 | -1.280716 | 0.157191  |
| C | -2.452987 | -0.935007 | -1.121770 |
| C | -3.657444 | -0.047184 | -0.920079 |
| C | -4.919404 | -0.490515 | -1.366215 |
| H | -5.011449 | -1.454486 | -1.869760 |
| C | -6.059931 | 0.295075  | -1.162115 |
| H | -7.030158 | -0.064408 | -1.518313 |
| C | -5.961306 | 1.530207  | -0.506137 |
| H | -6.854419 | 2.142429  | -0.347048 |
| C | -4.709584 | 1.975345  | -0.059409 |
| H | -4.615883 | 2.939923  | 0.449560  |
| C | -3.564544 | 1.196372  | -0.265026 |
| H | -2.602207 | 1.565499  | 0.088177  |
| C | -2.270578 | 0.049049  | 3.702735  |

|    |           |           |           |
|----|-----------|-----------|-----------|
| H  | -3.055163 | -0.332982 | 4.372863  |
| H  | -1.297595 | -0.303277 | 4.073031  |
| C  | -2.316714 | 1.575851  | 3.619050  |
| H  | -2.182452 | 2.002749  | 4.626696  |
| H  | -1.513763 | 1.960862  | 2.970188  |
| H  | -3.285695 | 1.924931  | 3.223442  |
| C  | -3.914061 | -0.994285 | 2.132905  |
| H  | -4.550276 | -0.156400 | 2.463012  |
| H  | -4.076184 | -1.102510 | 1.057344  |
| C  | -4.262780 | -2.286214 | 2.874282  |
| H  | -3.629659 | -3.121711 | 2.532795  |
| H  | -4.145998 | -2.184594 | 3.966037  |
| H  | -5.315500 | -2.542044 | 2.669408  |
| B  | -2.483412 | -2.527146 | -0.401103 |
| B  | -1.491408 | -3.560631 | -1.427043 |
| H  | -1.763427 | -4.721712 | -1.507569 |
| B  | -0.792173 | -2.885924 | 0.059575  |
| H  | -0.609445 | -3.433538 | 1.105938  |
| B  | 0.180167  | -2.931402 | -1.434396 |
| H  | 1.129966  | -3.650134 | -1.512115 |
| B  | 0.146158  | -1.284912 | -2.145766 |
| H  | 1.058538  | -0.806752 | -2.752636 |
| B  | -1.541597 | -0.913265 | -2.572772 |
| H  | -1.921020 | -0.163460 | -3.417955 |
| B  | -2.535379 | -2.314368 | -2.149582 |
| H  | -3.552901 | -2.525647 | -2.730209 |
| B  | -0.904149 | -2.566780 | -2.796583 |
| H  | -0.748605 | -3.012275 | -3.894976 |
| B  | -0.813141 | -0.194004 | -1.103630 |
| B  | 0.194500  | -1.491602 | -0.403070 |
| Pd | 1.477439  | -0.721370 | 0.975017  |
| H  | -3.421049 | -2.829299 | 0.259839  |
| C  | -0.533472 | 1.352779  | -0.982125 |
| C  | -0.548408 | 2.112822  | -2.174206 |
| C  | -0.193631 | 2.043130  | 0.204593  |
| C  | -0.266136 | 3.483242  | -2.175865 |
| H  | -0.785173 | 1.625322  | -3.123768 |
| C  | 0.086183  | 3.413348  | 0.203331  |
| H  | -0.136361 | 1.512034  | 1.156336  |
| C  | 0.047994  | 4.166649  | -0.985515 |
| H  | -0.292448 | 4.032743  | -3.123598 |
| H  | 0.350015  | 3.905542  | 1.145853  |
| C  | 0.315379  | 5.651879  | -0.985432 |
| H  | 0.859373  | 5.965224  | -0.079884 |
| H  | 0.899765  | 5.955839  | -1.870372 |
| H  | -0.635437 | 6.216256  | -1.016491 |
| C  | 2.983013  | 0.496568  | 0.143836  |
| C  | 2.776223  | 1.132150  | -1.084997 |
| C  | 3.540498  | 1.153898  | 1.253627  |
| C  | 3.076781  | 2.496441  | -1.172573 |
| H  | 2.367352  | 0.592754  | -1.940982 |
| C  | 3.805758  | 2.527438  | 1.135956  |
| H  | 3.778571  | 0.622110  | 2.180942  |
| C  | 3.586557  | 3.216634  | -0.073012 |
| H  | 2.896322  | 3.010685  | -2.122008 |
| H  | 4.222162  | 3.057017  | 2.000008  |

|   |          |           |           |
|---|----------|-----------|-----------|
| C | 3.929857 | 4.681465  | -0.195661 |
| H | 3.494983 | 5.120972  | -1.106780 |
| H | 3.567092 | 5.251679  | 0.676653  |
| H | 5.025531 | 4.821211  | -0.243611 |
| I | 3.544461 | -1.936798 | -0.021084 |

### TS3b-B6

Lowest frequency = -120.72 cm<sup>-1</sup>

Charge = 0, Multiplicity = 1

85

|   |           |           |           |
|---|-----------|-----------|-----------|
| O | -0.123317 | 0.706495  | 1.050401  |
| N | 1.690728  | 0.849008  | 2.326287  |
| C | 0.998068  | 0.216821  | 1.366366  |
| C | 1.400394  | -1.076801 | 0.660983  |
| C | 1.541666  | -1.029744 | -0.989771 |
| C | 1.523248  | 0.320415  | -1.664430 |
| C | 0.858007  | 0.477830  | -2.894805 |
| H | 0.338396  | -0.371266 | -3.341372 |
| C | 0.855565  | 1.717358  | -3.542984 |
| H | 0.324897  | 1.823434  | -4.494198 |
| C | 1.509023  | 2.816463  | -2.973144 |
| H | 1.492303  | 3.788745  | -3.474883 |
| C | 2.156156  | 2.671627  | -1.741405 |
| H | 2.649571  | 3.527787  | -1.271862 |
| C | 2.159237  | 1.435578  | -1.089849 |
| H | 2.684346  | 1.340402  | -0.137634 |
| C | 1.073227  | 2.088707  | 2.870490  |
| H | 0.003122  | 1.890161  | 3.035634  |
| H | 1.551714  | 2.264184  | 3.847054  |
| C | 1.249618  | 3.289262  | 1.937733  |
| H | 0.798230  | 4.178860  | 2.408263  |
| H | 2.319362  | 3.497314  | 1.757493  |
| H | 0.738367  | 3.121613  | 0.975882  |
| C | 2.987521  | 0.456026  | 2.885593  |
| H | 3.463098  | -0.242782 | 2.193301  |
| H | 3.621619  | 1.360054  | 2.901635  |
| C | 2.871781  | -0.154165 | 4.283986  |
| H | 2.430427  | 0.553793  | 5.006032  |
| H | 2.249086  | -1.063641 | 4.262735  |
| H | 3.876701  | -0.428245 | 4.647497  |
| B | -0.034811 | -1.547330 | -0.327967 |
| B | 0.055330  | -3.307223 | -0.340231 |
| H | -0.954733 | -3.936689 | -0.463081 |
| B | 0.463940  | -2.425987 | 1.152127  |
| H | -0.199469 | -2.288324 | 2.137654  |
| B | 1.417748  | -3.849891 | 0.674173  |
| H | 1.371079  | -4.855642 | 1.324226  |
| B | 2.927185  | -3.279211 | -0.080133 |
| H | 3.974637  | -3.853162 | 0.006791  |
| B | 2.488493  | -2.359385 | -1.542475 |
| H | 3.171528  | -2.169371 | -2.503922 |
| B | 0.728504  | -2.377934 | -1.693172 |
| H | 0.233445  | -2.264717 | -2.770969 |
| B | 1.578044  | -3.822618 | -1.101696 |
| H | 1.648181  | -4.809004 | -1.778055 |
| B | 2.976904  | -1.508261 | -0.064760 |

|    |           |           |           |
|----|-----------|-----------|-----------|
| B  | 2.245330  | -2.404598 | 1.304489  |
| H  | 2.734536  | -2.306165 | 2.388540  |
| Pd | -1.409646 | -0.073771 | -0.349770 |
| O  | -2.635452 | 1.714514  | -0.235951 |
| C  | -1.897176 | 2.748797  | -0.401783 |
| O  | -0.754277 | 2.809849  | -0.865478 |
| C  | -2.520766 | 4.053896  | 0.162588  |
| F  | -2.119272 | 4.208988  | 1.460272  |
| F  | -2.111566 | 5.146143  | -0.513727 |
| F  | -3.870657 | 4.049474  | 0.160552  |
| C  | 4.367805  | -0.762832 | -0.032922 |
| C  | 5.278136  | -1.045079 | 1.010698  |
| C  | 4.855712  | 0.012455  | -1.108461 |
| C  | 6.576357  | -0.521992 | 1.018865  |
| H  | 4.973674  | -1.709268 | 1.827562  |
| C  | 6.153179  | 0.534524  | -1.103456 |
| H  | 4.217099  | 0.205380  | -1.974128 |
| C  | 7.035699  | 0.292914  | -0.032488 |
| H  | 7.250796  | -0.765230 | 1.848110  |
| H  | 6.491580  | 1.133773  | -1.956711 |
| C  | 8.424397  | 0.887296  | -0.017841 |
| H  | 9.087755  | 0.345636  | 0.676699  |
| H  | 8.880040  | 0.867296  | -1.022822 |
| H  | 8.394423  | 1.945365  | 0.305393  |
| C  | -3.407185 | -1.282806 | 0.249919  |
| C  | -4.326122 | -0.332891 | 0.717620  |
| C  | -3.120508 | -2.453634 | 0.959068  |
| C  | -4.906730 | -0.545431 | 1.973742  |
| H  | -4.539009 | 0.573894  | 0.149487  |
| C  | -3.716673 | -2.632614 | 2.215932  |
| H  | -2.440426 | -3.204727 | 0.556161  |
| C  | -4.612837 | -1.687219 | 2.747194  |
| H  | -5.607116 | 0.206206  | 2.356103  |
| H  | -3.475258 | -3.537216 | 2.785808  |
| I  | -2.989447 | -1.299052 | -2.050285 |
| C  | -5.245743 | -1.881998 | 4.105439  |
| H  | -5.009670 | -2.875346 | 4.520701  |
| H  | -4.885630 | -1.120006 | 4.821506  |
| H  | -6.344627 | -1.782497 | 4.052151  |

#### TS3b-B4

Lowest frequency = -109.140 cm<sup>-1</sup>

Charge = 0, Multiplicity = 1

85

|   |          |           |           |
|---|----------|-----------|-----------|
| O | 0.136001 | -0.947359 | -0.940979 |
| N | 1.748870 | -2.484961 | -1.097230 |
| C | 1.140308 | -1.506039 | -0.412775 |
| C | 1.442955 | -1.028186 | 1.002197  |
| C | 2.863516 | -0.428429 | 1.577725  |
| C | 4.077356 | -0.431694 | 0.680252  |
| C | 5.346299 | -0.706515 | 1.224297  |
| H | 5.442126 | -0.907183 | 2.292987  |
| C | 6.481810 | -0.728297 | 0.404660  |
| H | 7.459666 | -0.943705 | 0.847049  |
| C | 6.367928 | -0.479757 | -0.970053 |
| H | 7.256318 | -0.499043 | -1.609589 |

|    |           |           |           |
|----|-----------|-----------|-----------|
| C  | 5.108125  | -0.202497 | -1.518270 |
| H  | 5.001735  | 0.001789  | -2.588401 |
| C  | 3.972190  | -0.172672 | -0.701646 |
| H  | 3.006510  | 0.064866  | -1.150088 |
| C  | 1.120913  | -2.844579 | -2.398146 |
| H  | 1.482355  | -3.855666 | -2.642044 |
| H  | 0.034650  | -2.896211 | -2.233489 |
| C  | 1.474117  | -1.855573 | -3.509698 |
| H  | 0.981673  | -2.171143 | -4.444676 |
| H  | 1.113236  | -0.845721 | -3.257399 |
| H  | 2.564133  | -1.815635 | -3.685008 |
| C  | 2.957201  | -3.243174 | -0.736989 |
| H  | 3.596347  | -3.262301 | -1.637214 |
| H  | 3.515250  | -2.689658 | 0.025375  |
| C  | 2.633854  | -4.661934 | -0.263177 |
| H  | 1.999755  | -4.638583 | 0.637844  |
| H  | 2.104808  | -5.240227 | -1.038832 |
| H  | 3.571661  | -5.189870 | -0.020609 |
| B  | 2.280144  | -1.961180 | 2.180224  |
| B  | 1.479057  | -1.621679 | 3.704972  |
| H  | 1.478045  | -2.465256 | 4.555060  |
| B  | 0.506819  | -1.789480 | 2.222718  |
| H  | -0.142534 | -2.730942 | 1.875831  |
| B  | 0.114155  | -0.510986 | 3.393986  |
| H  | -0.891772 | -0.561569 | 4.039887  |
| B  | 0.778066  | 1.021314  | 2.767655  |
| H  | 0.299094  | 2.096715  | 2.974881  |
| B  | 2.543988  | 0.847229  | 2.678064  |
| H  | 3.352625  | 1.723012  | 2.739482  |
| B  | 2.976775  | -0.763978 | 3.264804  |
| H  | 4.052803  | -0.973098 | 3.735476  |
| B  | 1.649037  | 0.122978  | 4.036248  |
| H  | 1.776998  | 0.557259  | 5.145646  |
| B  | 1.544238  | 0.741427  | 1.192103  |
| B  | 0.055071  | -0.153865 | 1.644776  |
| Pd | -1.440130 | -0.313358 | 0.281417  |
| O  | -1.876067 | -2.907847 | -0.805496 |
| C  | -2.575586 | -2.153077 | -1.498292 |
| O  | -2.824404 | -0.912491 | -1.308150 |
| C  | -3.147232 | -2.725292 | -2.822604 |
| F  | -4.190366 | -2.023160 | -3.306856 |
| F  | -2.162598 | -2.694069 | -3.774036 |
| F  | -3.535207 | -4.009411 | -2.695217 |
| H  | 2.855662  | -2.945803 | 1.856521  |
| C  | 1.738162  | 1.782437  | 0.022539  |
| C  | 2.855641  | 2.652614  | 0.037052  |
| C  | 0.830134  | 1.937300  | -1.046041 |
| C  | 3.064838  | 3.600289  | -0.967762 |
| H  | 3.586307  | 2.578816  | 0.847615  |
| C  | 1.046630  | 2.877243  | -2.061479 |
| H  | -0.070947 | 1.321851  | -1.091285 |
| C  | 2.166263  | 3.726258  | -2.046679 |
| H  | 3.945358  | 4.251647  | -0.917079 |
| H  | 0.316784  | 2.955340  | -2.874686 |
| C  | 2.391455  | 4.754870  | -3.130513 |
| H  | 3.407851  | 4.673348  | -3.555907 |

|   |           |          |           |
|---|-----------|----------|-----------|
| H | 1.663624  | 4.640630 | -3.950541 |
| H | 2.292070  | 5.780660 | -2.728720 |
| C | -2.491210 | 1.883153 | 0.441678  |
| C | -1.711484 | 2.904139 | 1.005776  |
| C | -3.044756 | 1.998241 | -0.840891 |
| C | -1.434488 | 4.037692 | 0.236627  |
| H | -1.311125 | 2.808859 | 2.015896  |
| C | -2.741479 | 3.147210 | -1.588733 |
| H | -3.649608 | 1.194643 | -1.267121 |
| C | -1.939533 | 4.181169 | -1.071505 |
| H | -0.799955 | 4.821199 | 0.665858  |
| H | -3.146321 | 3.229947 | -2.603961 |
| C | -1.614614 | 5.409944 | -1.887260 |
| H | -0.521289 | 5.533809 | -1.989730 |
| H | -2.050252 | 5.349260 | -2.897958 |
| H | -2.002420 | 6.324498 | -1.402424 |
| I | -3.381784 | 0.369825 | 1.919947  |

## X-Ray crystallographic analysis

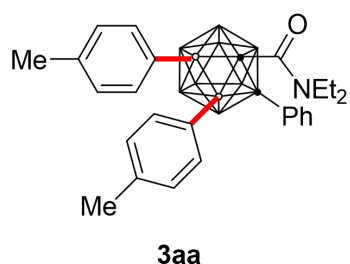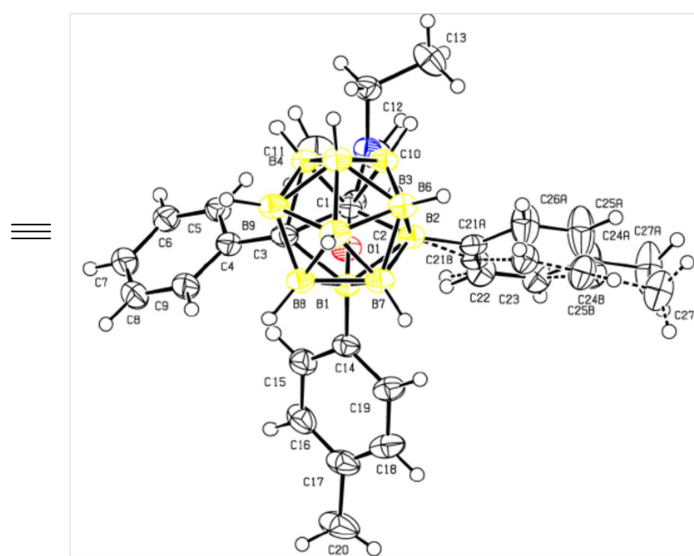

CCDC 1893305

### Crystal data and structure refinement for 3aa.

|                                    |                                                               |
|------------------------------------|---------------------------------------------------------------|
| Identification code                | 0538_CG_0m                                                    |
| CCDC number                        | 1893305                                                       |
| Empirical formula                  | C <sub>27</sub> H <sub>37</sub> B <sub>10</sub> NO            |
| Formula weight                     | 499.68                                                        |
| Temperature/K                      | 100.03                                                        |
| Crystal system                     | monoclinic                                                    |
| Space group                        | C2/c                                                          |
| a/Å                                | 12.5994(11)                                                   |
| b/Å                                | 23.669(2)                                                     |
| c/Å                                | 21.4198(18)                                                   |
| α/°                                | 90                                                            |
| β/°                                | 102.169(3)                                                    |
| γ/°                                | 90                                                            |
| Volume/Å <sup>3</sup>              | 6244.2(9)                                                     |
| Z                                  | 8                                                             |
| ρ <sub>calc</sub> /cm <sup>3</sup> | 1.190                                                         |
| μ/mm <sup>-1</sup>                 | 1.633                                                         |
| F(000)                             | 2344.0                                                        |
| Crystal size/mm <sup>3</sup>       | 0.425 × 0.4 × 0.368                                           |
| Radiation                          | CuKα (λ = 1.54178)                                            |
| 2θ range for data collection/°     | 7.47 to 149.188                                               |
| Index ranges                       | -15 ≤ h ≤ 14, -29 ≤ k ≤ 29, -26 ≤ l ≤ 26                      |
| Reflections collected              | 38084                                                         |
| Independent reflections            | 6321 [R <sub>int</sub> = 0.0376, R <sub>sigma</sub> = 0.0261] |
| Data/restraints/parameters         | 6321/90/429                                                   |

|                                                |                                  |
|------------------------------------------------|----------------------------------|
| Goodness-of-fit on $F^2$                       | 1.025                            |
| Final R indexes [ $I \geq 2\sigma(I)$ ]        | $R_1 = 0.0515$ , $wR_2 = 0.1443$ |
| Final R indexes [all data]                     | $R_1 = 0.0526$ , $wR_2 = 0.1455$ |
| Largest diff. peak/hole / $e \text{ \AA}^{-3}$ | 0.36/-0.24                       |

**Fractional Atomic Coordinates ( $\times 10^4$ ) and Equivalent Isotropic Displacement Parameters ( $\text{\AA}^2 \times 10^3$ ) for 0538\_CG\_0m.  $U_{eq}$  is defined as 1/3 of of the trace of the orthogonalised  $U_{ij}$  tensor.**

| Atom | <i>x</i>    | <i>y</i>   | <i>z</i>   | U(eq)    |
|------|-------------|------------|------------|----------|
| O1   | 7895.7(7)   | 3538.7(4)  | 4870.3(4)  | 36.1(2)  |
| N1   | 9698.3(8)   | 3611.1(4)  | 5235.0(5)  | 33.2(2)  |
| C1   | 8665.1(9)   | 3762.6(5)  | 5229.2(5)  | 29.8(2)  |
| C2   | 8381.0(9)   | 4206.9(5)  | 5694.3(5)  | 28.4(2)  |
| C3   | 7618.3(9)   | 4767.2(5)  | 5377.8(6)  | 30.4(2)  |
| C4   | 7390.5(9)   | 4882.5(5)  | 4668.3(6)  | 31.6(3)  |
| C5   | 8090.4(10)  | 4708.2(5)  | 4278.5(6)  | 33.0(3)  |
| C6   | 7855.5(11)  | 4822.6(6)  | 3629.1(6)  | 37.5(3)  |
| C7   | 6917.4(12)  | 5116.9(7)  | 3356.1(7)  | 43.7(3)  |
| C8   | 6235.3(11)  | 5303.7(7)  | 3743.9(7)  | 46.5(3)  |
| C9   | 6466.9(10)  | 5192.1(6)  | 4393.1(7)  | 39.1(3)  |
| C10  | 9811.5(12)  | 3144.0(6)  | 4796.4(7)  | 43.7(3)  |
| C11  | 9756.9(13)  | 3346.6(7)  | 4119.9(7)  | 51.4(4)  |
| C12  | 10726.7(10) | 3884.7(6)  | 5534.5(6)  | 34.9(3)  |
| C13  | 11424.7(13) | 3531.8(7)  | 6054.9(8)  | 51.6(4)  |
| C14  | 5975.6(9)   | 3863.5(5)  | 5299.1(6)  | 33.1(3)  |
| C15  | 5650.1(11)  | 3858.7(6)  | 4634.0(7)  | 41.2(3)  |
| C16  | 4690.8(13)  | 3599.4(6)  | 4328.6(8)  | 48.9(4)  |
| C17  | 4016.7(11)  | 3327.7(6)  | 4670.0(8)  | 48.3(4)  |
| C18  | 4345.4(11)  | 3316.3(6)  | 5328.7(8)  | 47.0(4)  |
| C19  | 5302.7(11)  | 3577.3(6)  | 5638.6(7)  | 39.6(3)  |
| C20  | 2965.1(13)  | 3062.6(7)  | 4323.6(12) | 69.5(6)  |
| C21A | 8103.3(18)  | 3332.7(9)  | 6577.7(11) | 30.9(3)  |
| C21B | 7856(13)    | 3279(8)    | 6541(10)   | 30.9(3)  |
| C22  | 7790.4(12)  | 2874.7(6)  | 6164.4(6)  | 40.6(3)  |
| C23  | 7920.2(12)  | 2320.0(6)  | 6371.8(7)  | 41.0(3)  |
| C24A | 8333(3)     | 2191.1(11) | 6990.8(12) | 54.7(7)  |
| C24B | 8054(18)    | 2201(10)   | 7082(11)   | 38(2)    |
| C25A | 8668(4)     | 2638.9(9)  | 7406.6(9)  | 78.8(13) |
| C25B | 7921(17)    | 2637(6)    | 7442(7)    | 45(3)    |
| C26A | 8560(3)     | 3194.4(8)  | 7201.4(8)  | 60.2(8)  |
| C26B | 7926(16)    | 3180(6)    | 7201(6)    | 39(3)    |
| C27A | 8432(4)     | 1586.4(10) | 7214.4(13) | 85.0(12) |
| C27B | 8040(19)    | 1584(7)    | 7377(10)   | 53(4)    |
| B1   | 6948.0(10)  | 4216.0(6)  | 5698.8(6)  | 30.8(3)  |



|     |            |           |           |         |
|-----|------------|-----------|-----------|---------|
| B2  | 7977.9(11) | 3967.3(6) | 6373.5(6) | 30.9(3) |
| B3  | 9190.7(11) | 4384.0(6) | 6416.6(6) | 31.2(3) |
| B4  | 8960.2(11) | 4871.1(6) | 5771.2(7) | 31.0(3) |
| B5  | 8915.8(12) | 5103.3(6) | 6548.6(7) | 35.3(3) |
| B6  | 8302.8(12) | 4553.1(6) | 6923.4(7) | 34.9(3) |
| B7  | 6955.9(11) | 4457.2(6) | 6488.0(7) | 34.2(3) |
| B8  | 6721.4(11) | 4945.4(6) | 5850.2(7) | 34.1(3) |
| B9  | 7922.2(11) | 5341.9(6) | 5882.2(7) | 34.8(3) |
| B10 | 7528.0(12) | 5148.9(6) | 6599.3(7) | 37.2(3) |

**Anisotropic Displacement Parameters ( $\text{\AA}^2 \times 10^3$ ) for 0538\_CG\_0m. The Anisotropic displacement factor exponent takes the form:  $-2\pi^2[\text{h}^2\text{a}^{*2}\text{U}_{11}+2\text{hka}^*\text{b}^*\text{U}_{12}+\dots]$ .**

| Atom | $U_{11}$ | $U_{22}$ | $U_{33}$  | $U_{23}$ | $U_{13}$ | $U_{12}$ |
|------|----------|----------|-----------|----------|----------|----------|
| O1   | 33.7(4)  | 40.1(5)  | 35.2(4)   | -8.8(4)  | 9.1(4)   | -4.8(3)  |
| N1   | 30.6(5)  | 33.1(5)  | 36.9(5)   | -3.4(4)  | 9.0(4)   | 3.6(4)   |
| C1   | 30.5(6)  | 30.9(6)  | 28.7(5)   | -1.2(4)  | 7.9(4)   | -0.1(4)  |
| C2   | 23.9(5)  | 31.1(6)  | 30.4(6)   | -1.8(4)  | 6.1(4)   | -0.1(4)  |
| C3   | 25.8(5)  | 30.6(6)  | 35.6(6)   | -1.8(4)  | 8.3(4)   | 2.2(4)   |
| C4   | 27.2(6)  | 32.6(6)  | 35.2(6)   | 1.4(4)   | 6.7(5)   | 0.5(4)   |
| C5   | 29.0(6)  | 33.6(6)  | 37.0(6)   | 0.5(5)   | 8.0(5)   | 1.2(4)   |
| C6   | 35.8(6)  | 40.9(7)  | 37.0(7)   | 1.1(5)   | 10.2(5)  | -0.5(5)  |
| C7   | 40.3(7)  | 52.9(8)  | 36.6(7)   | 9.1(6)   | 5.0(5)   | 1.3(6)   |
| C8   | 34.1(7)  | 55.6(8)  | 48.9(8)   | 14.4(6)  | 6.5(6)   | 8.6(6)   |
| C9   | 29.7(6)  | 44.6(7)  | 44.4(7)   | 6.9(5)   | 11.0(5)  | 6.5(5)   |
| C10  | 42.1(7)  | 39.3(7)  | 51.2(8)   | -11.4(6) | 13.0(6)  | 7.3(6)   |
| C11  | 46.5(8)  | 63.9(10) | 47.5(8)   | -19.4(7) | 18.5(6)  | -0.6(7)  |
| C12  | 27.5(6)  | 40.0(7)  | 37.7(6)   | -0.6(5)  | 8.4(5)   | 3.6(5)   |
| C13  | 49.2(8)  | 49.7(8)  | 50.1(8)   | -3.4(6)  | -2.7(7)  | 16.9(7)  |
| C14  | 24.5(5)  | 33.3(6)  | 41.2(7)   | -3.1(5)  | 6.3(5)   | 1.8(4)   |
| C15  | 37.6(7)  | 38.7(7)  | 43.2(7)   | 1.4(5)   | -0.4(5)  | -3.4(5)  |
| C16  | 45.6(8)  | 38.1(7)  | 52.9(8)   | -0.5(6)  | -12.5(6) | -0.5(6)  |
| C17  | 30.0(6)  | 29.2(6)  | 78.9(11)  | -7.6(6)  | -3.9(6)  | 2.7(5)   |
| C18  | 30.6(6)  | 37.6(7)  | 75.5(10)  | -10.6(6) | 17.5(6)  | -3.8(5)  |
| C19  | 31.2(6)  | 39.2(7)  | 51.2(8)   | -7.3(5)  | 14.8(5)  | -2.3(5)  |
| C20  | 38.4(8)  | 35.1(8)  | 120.0(16) | -10.9(9) | -17.4(9) | -1.0(6)  |
| C21A | 22.9(9)  | 37.9(5)  | 32.1(5)   | -2.8(4)  | 6.0(6)   | -5.6(5)  |
| C21B | 22.9(9)  | 37.9(5)  | 32.1(5)   | -2.8(4)  | 6.0(6)   | -5.6(5)  |
| C22  | 47.8(7)  | 39.4(5)  | 34.7(5)   | -4.7(3)  | 8.7(4)   | -6.0(4)  |
| C23  | 47.6(7)  | 38.8(4)  | 37.6(5)   | -4.7(4)  | 11.2(5)  | -5.7(4)  |
| C24A | 85(2)    | 39.3(8)  | 38.4(10)  | 0.4(7)   | 9.7(10)  | 1.0(11)  |
| C24B | 39(6)    | 38.8(10) | 38.1(6)   | -3.1(5)  | 10.9(10) | -3.7(14) |
| C25A | 148(4)   | 46.4(9)  | 31.5(8)   | 2.9(7)   | -5.1(12) | -3.2(12) |
| C25B | 63(9)    | 38.1(10) | 37.2(8)   | -0.7(6)  | 17(2)    | -1.1(15) |

|      |         |          |          |          |          |          |
|------|---------|----------|----------|----------|----------|----------|
| C26A | 102(2)  | 41.8(8)  | 31.1(7)  | -3.1(6)  | 0.1(9)   | -7.0(10) |
| C26B | 47(8)   | 38.2(10) | 33.2(5)  | -1.4(6)  | 10.4(14) | -2.3(14) |
| C27A | 163(4)  | 41.5(10) | 45.0(13) | 6.0(9)   | 7.9(16)  | 1.1(14)  |
| C27B | 84(11)  | 38.2(11) | 41(2)    | -3.5(10) | 22(3)    | -3.7(18) |
| B1   | 25.2(6) | 34.5(7)  | 33.9(6)  | -2.1(5)  | 9.2(5)   | 0.2(5)   |
| B2   | 28.3(6) | 36.7(7)  | 28.3(6)  | -4.3(5)  | 7.5(5)   | -2.5(5)  |
| B3   | 28.6(6) | 34.2(7)  | 30.1(6)  | -4.8(5)  | 4.9(5)   | -2.5(5)  |
| B4   | 27.0(6) | 30.1(6)  | 36.1(7)  | -2.9(5)  | 6.9(5)   | -0.5(5)  |
| B5   | 32.4(7) | 35.1(7)  | 38.7(7)  | -9.0(5)  | 8.6(5)   | -2.6(5)  |
| B6   | 33.9(7) | 39.5(7)  | 32.2(7)  | -8.3(5)  | 8.9(5)   | -3.3(5)  |
| B7   | 30.7(6) | 38.7(7)  | 34.9(7)  | -6.0(5)  | 10.7(5)  | -0.8(5)  |
| B8   | 28.6(6) | 35.8(7)  | 40.0(7)  | -4.2(5)  | 12.1(5)  | 1.8(5)   |
| B9   | 30.6(7) | 32.6(7)  | 42.5(7)  | -5.9(6)  | 10.6(6)  | 0.8(5)   |
| B10  | 35.1(7) | 37.8(7)  | 40.7(7)  | -9.1(6)  | 12.7(6)  | -0.4(6)  |

#### Bond Lengths for 0538\_CG\_0m.

| Atom | Atom | Length/Å   | Atom | Atom | Length/Å   |
|------|------|------------|------|------|------------|
| O1   | C1   | 1.2238(15) | C21B | C22  | 1.243(18)  |
| N1   | C1   | 1.3478(15) | C21B | C26B | 1.42(2)    |
| N1   | C10  | 1.4770(16) | C21B | B2   | 1.68(2)    |
| N1   | C12  | 1.4694(16) | C22  | C23  | 1.385(2)   |
| C1   | C2   | 1.5417(15) | C23  | C24A | 1.353(3)   |
| C2   | C3   | 1.6932(16) | C23  | C24B | 1.52(2)    |
| C2   | B1   | 1.8076(17) | C24A | C25A | 1.391(3)   |
| C2   | B2   | 1.7342(17) | C24A | C27A | 1.506(3)   |
| C2   | B3   | 1.7160(17) | C24B | C25B | 1.32(3)    |
| C2   | B4   | 1.7265(17) | C24B | C27B | 1.59(3)    |
| C3   | C4   | 1.5108(17) | C25A | C26A | 1.384(3)   |
| C3   | B1   | 1.7699(18) | C25B | C26B | 1.385(19)  |
| C3   | B4   | 1.7403(17) | B1   | B2   | 1.8243(19) |
| C3   | B8   | 1.7207(17) | B1   | B7   | 1.7823(19) |
| C3   | B9   | 1.7291(18) | B1   | B8   | 1.7904(19) |
| C4   | C5   | 1.3984(17) | B2   | B3   | 1.8047(19) |
| C4   | C9   | 1.3962(17) | B2   | B6   | 1.8094(19) |
| C5   | C6   | 1.3863(18) | B2   | B7   | 1.7877(19) |
| C6   | C7   | 1.3903(19) | B3   | B4   | 1.776(2)   |
| C7   | C8   | 1.387(2)   | B3   | B5   | 1.772(2)   |
| C8   | C9   | 1.385(2)   | B3   | B6   | 1.7614(19) |
| C10  | C11  | 1.514(2)   | B4   | B5   | 1.766(2)   |
| C12  | C13  | 1.5166(19) | B4   | B9   | 1.7719(19) |
| C14  | C15  | 1.3969(18) | B5   | B6   | 1.788(2)   |
| C14  | C19  | 1.4023(18) | B5   | B9   | 1.780(2)   |
| C14  | B1   | 1.5774(17) | B5   | B10  | 1.778(2)   |

|      |      |            |    |     |          |
|------|------|------------|----|-----|----------|
| C15  | C16  | 1.3900(19) | B6 | B7  | 1.770(2) |
| C16  | C17  | 1.390(2)   | B6 | B10 | 1.771(2) |
| C17  | C18  | 1.384(2)   | B7 | B8  | 1.766(2) |
| C17  | C20  | 1.5117(19) | B7 | B10 | 1.785(2) |
| C18  | C19  | 1.3926(19) | B8 | B9  | 1.769(2) |
| C21A | C22  | 1.403(2)   | B8 | B10 | 1.775(2) |
| C21A | C26A | 1.378(3)   | B9 | B10 | 1.771(2) |
| C21A | B2   | 1.563(3)   |    |     |          |

### Bond Angles for 0538\_CG\_0m.

| Atom | Atom | Atom | Angle/°    | Atom | Atom | Atom | Angle/°    |
|------|------|------|------------|------|------|------|------------|
| C1   | N1   | C10  | 114.57(10) | C21A | B2   | B1   | 123.02(12) |
| C1   | N1   | C12  | 130.38(10) | C21A | B2   | B3   | 118.44(12) |
| C12  | N1   | C10  | 114.40(10) | C21A | B2   | B6   | 123.95(12) |
| O1   | C1   | N1   | 121.75(11) | C21A | B2   | B7   | 128.18(12) |
| O1   | C1   | C2   | 116.12(10) | C21B | B2   | C2   | 123.5(7)   |
| N1   | C1   | C2   | 122.07(10) | C21B | B2   | B1   | 113.6(6)   |
| C1   | C2   | C3   | 117.70(9)  | C21B | B2   | B3   | 129.3(6)   |
| C1   | C2   | B1   | 112.33(9)  | C21B | B2   | B6   | 128.4(7)   |
| C1   | C2   | B2   | 117.91(9)  | C21B | B2   | B7   | 119.9(6)   |
| C1   | C2   | B3   | 125.05(9)  | B3   | B2   | B1   | 108.50(9)  |
| C1   | C2   | B4   | 122.11(9)  | B3   | B2   | B6   | 58.33(7)   |
| C3   | C2   | B1   | 60.63(7)   | B6   | B2   | B1   | 107.09(10) |
| C3   | C2   | B2   | 110.50(8)  | B7   | B2   | B1   | 59.12(7)   |
| C3   | C2   | B3   | 110.43(9)  | B7   | B2   | B3   | 105.37(10) |
| C3   | C2   | B4   | 61.17(7)   | B7   | B2   | B6   | 58.96(8)   |
| B2   | C2   | B1   | 61.97(7)   | C2   | B3   | B2   | 58.96(7)   |
| B3   | C2   | B1   | 113.39(9)  | C2   | B3   | B4   | 59.22(7)   |
| B3   | C2   | B2   | 63.08(7)   | C2   | B3   | B5   | 106.23(10) |
| B3   | C2   | B4   | 62.13(8)   | C2   | B3   | B6   | 106.08(9)  |
| B4   | C2   | B1   | 113.03(9)  | B4   | B3   | B2   | 108.49(9)  |
| B4   | C2   | B2   | 114.24(9)  | B5   | B3   | B2   | 109.96(10) |
| C2   | C3   | B1   | 62.88(7)   | B5   | B3   | B4   | 59.68(8)   |
| C2   | C3   | B4   | 60.36(7)   | B6   | B3   | B2   | 60.97(8)   |
| C2   | C3   | B8   | 110.13(9)  | B6   | B3   | B4   | 108.14(10) |
| C2   | C3   | B9   | 109.49(9)  | B6   | B3   | B5   | 60.81(8)   |
| C4   | C3   | C2   | 121.05(9)  | C2   | B4   | C3   | 58.47(7)   |
| C4   | C3   | B1   | 121.26(10) | C2   | B4   | B3   | 58.64(7)   |
| C4   | C3   | B4   | 114.88(9)  | C2   | B4   | B5   | 106.06(9)  |
| C4   | C3   | B8   | 122.56(10) | C2   | B4   | B9   | 106.04(9)  |
| C4   | C3   | B9   | 117.16(10) | C3   | B4   | B3   | 105.54(9)  |
| B4   | C3   | B1   | 114.24(9)  | C3   | B4   | B5   | 106.25(9)  |
| B8   | C3   | B1   | 61.70(8)   | C3   | B4   | B9   | 58.98(7)   |

|      |      |      |            |     |    |     |            |
|------|------|------|------------|-----|----|-----|------------|
| B8   | C3   | B4   | 111.84(9)  | B5  | B4 | B3  | 60.04(8)   |
| B8   | C3   | B9   | 61.72(8)   | B5  | B4 | B9  | 60.44(8)   |
| B9   | C3   | B1   | 113.46(9)  | B9  | B4 | B3  | 107.94(10) |
| B9   | C3   | B4   | 61.42(7)   | B3  | B5 | B6  | 59.29(8)   |
| C5   | C4   | C3   | 122.50(10) | B3  | B5 | B9  | 107.74(10) |
| C9   | C4   | C3   | 118.96(11) | B3  | B5 | B10 | 107.21(10) |
| C9   | C4   | C5   | 118.50(11) | B4  | B5 | B3  | 60.28(8)   |
| C6   | C5   | C4   | 120.89(11) | B4  | B5 | B6  | 107.41(9)  |
| C5   | C6   | C7   | 120.17(12) | B4  | B5 | B9  | 59.95(8)   |
| C8   | C7   | C6   | 119.13(13) | B4  | B5 | B10 | 107.68(10) |
| C9   | C8   | C7   | 120.96(13) | B9  | B5 | B6  | 107.08(10) |
| C8   | C9   | C4   | 120.30(12) | B10 | B5 | B6  | 59.57(8)   |
| N1   | C10  | C11  | 112.38(12) | B10 | B5 | B9  | 59.70(8)   |
| N1   | C12  | C13  | 113.55(12) | B3  | B6 | B2  | 60.70(7)   |
| C15  | C14  | C19  | 116.44(12) | B3  | B6 | B5  | 59.89(8)   |
| C15  | C14  | B1   | 125.83(11) | B3  | B6 | B7  | 108.01(9)  |
| C19  | C14  | B1   | 117.34(11) | B3  | B6 | B10 | 107.97(10) |
| C16  | C15  | C14  | 121.52(14) | B5  | B6 | B2  | 109.01(9)  |
| C17  | C16  | C15  | 121.60(15) | B7  | B6 | B2  | 59.91(8)   |
| C16  | C17  | C20  | 120.22(17) | B7  | B6 | B5  | 108.28(10) |
| C18  | C17  | C16  | 117.42(13) | B7  | B6 | B10 | 60.51(8)   |
| C18  | C17  | C20  | 122.36(17) | B10 | B6 | B2  | 108.94(10) |
| C17  | C18  | C19  | 121.34(14) | B10 | B6 | B5  | 59.92(8)   |
| C18  | C19  | C14  | 121.64(14) | B1  | B7 | B2  | 61.46(7)   |
| C22  | C21A | B2   | 124.59(18) | B1  | B7 | B10 | 109.99(10) |
| C26A | C21A | C22  | 115.63(18) | B6  | B7 | B1  | 110.72(9)  |
| C26A | C21A | B2   | 119.77(16) | B6  | B7 | B2  | 61.13(8)   |
| C22  | C21B | C26B | 120.1(17)  | B6  | B7 | B10 | 59.78(8)   |
| C22  | C21B | B2   | 127.2(16)  | B8  | B7 | B1  | 60.61(8)   |
| C26B | C21B | B2   | 112.6(12)  | B8  | B7 | B2  | 109.03(9)  |
| C21B | C22  | C23  | 122.4(10)  | B8  | B7 | B6  | 108.01(10) |
| C23  | C22  | C21A | 122.14(15) | B8  | B7 | B10 | 60.00(9)   |
| C22  | C23  | C24B | 118.5(9)   | B10 | B7 | B2  | 109.34(10) |
| C24A | C23  | C22  | 121.54(16) | C3  | B8 | B1  | 60.50(7)   |
| C23  | C24A | C25A | 117.2(2)   | C3  | B8 | B7  | 105.73(9)  |
| C23  | C24A | C27A | 121.0(2)   | C3  | B8 | B9  | 59.37(7)   |
| C25A | C24A | C27A | 121.8(2)   | C3  | B8 | B10 | 106.04(10) |
| C23  | C24B | C27B | 124.0(16)  | B7  | B8 | B1  | 60.15(8)   |
| C25B | C24B | C23  | 116.0(17)  | B7  | B8 | B9  | 108.35(10) |
| C25B | C24B | C27B | 118.1(16)  | B7  | B8 | B10 | 60.52(8)   |
| C26A | C25A | C24A | 121.62(19) | B9  | B8 | B1  | 110.53(9)  |
| C24B | C25B | C26B | 119.7(14)  | B9  | B8 | B10 | 59.95(8)   |
| C21A | C26A | C25A | 121.78(17) | B10 | B8 | B1  | 110.04(10) |
| C25B | C26B | C21B | 121.5(13)  | C3  | B9 | B4  | 59.60(7)   |
| C2   | B1   | B2   | 57.04(7)   | C3  | B9 | B5  | 106.09(10) |

|      |    |    |            |     |     |     |            |
|------|----|----|------------|-----|-----|-----|------------|
| C3   | B1 | C2 | 56.48(6)   | C3  | B9  | B8  | 58.91(7)   |
| C3   | B1 | B2 | 103.16(9)  | C3  | B9  | B10 | 105.87(10) |
| C3   | B1 | B7 | 102.99(9)  | B4  | B9  | B5  | 59.61(8)   |
| C3   | B1 | B8 | 57.80(7)   | B8  | B9  | B4  | 108.09(10) |
| C14  | B1 | C2 | 130.78(10) | B8  | B9  | B5  | 108.28(10) |
| C14  | B1 | C3 | 123.96(10) | B8  | B9  | B10 | 60.19(8)   |
| C14  | B1 | B2 | 126.91(10) | B10 | B9  | B4  | 107.71(10) |
| C14  | B1 | B7 | 122.19(10) | B10 | B9  | B5  | 60.08(9)   |
| C14  | B1 | B8 | 118.23(10) | B5  | B10 | B7  | 108.11(10) |
| B7   | B1 | C2 | 101.71(9)  | B6  | B10 | B5  | 60.51(8)   |
| B7   | B1 | B2 | 59.42(8)   | B6  | B10 | B7  | 59.71(8)   |
| B7   | B1 | B8 | 59.24(8)   | B6  | B10 | B8  | 107.53(10) |
| B8   | B1 | C2 | 102.13(9)  | B8  | B10 | B5  | 108.14(10) |
| B8   | B1 | B2 | 106.36(9)  | B8  | B10 | B7  | 59.48(8)   |
| C2   | B2 | B1 | 60.99(7)   | B9  | B10 | B5  | 60.22(8)   |
| C2   | B2 | B3 | 57.97(7)   | B9  | B10 | B6  | 108.24(10) |
| C2   | B2 | B6 | 103.26(9)  | B9  | B10 | B7  | 107.45(10) |
| C2   | B2 | B7 | 104.46(9)  | B9  | B10 | B8  | 59.86(8)   |
| C21A | B2 | C2 | 121.25(12) |     |     |     |            |

**Hydrogen Atom Coordinates ( $\text{\AA}\times 10^4$ ) and Isotropic Displacement Parameters ( $\text{\AA}^2\times 10^3$ ) for 0538\_CG\_0m.**

| Atom | <i>x</i> | <i>y</i> | <i>z</i> | U(eq) |
|------|----------|----------|----------|-------|
| H5   | 8735.58  | 4508.79  | 4461.07  | 40    |
| H6   | 8336.83  | 4699.46  | 3370.03  | 45    |
| H7   | 6745.74  | 5189.25  | 2909.89  | 52    |
| H8   | 5600.08  | 5511.08  | 3561.43  | 56    |
| H9   | 5995.29  | 5326.87  | 4652.43  | 47    |
| H10A | 9226.22  | 2864.97  | 4796.4   | 52    |
| H10B | 10514.89 | 2951.7   | 4953.45  | 52    |
| H11A | 9851.61  | 3024.56  | 3849.28  | 77    |
| H11B | 10334.28 | 3623.4   | 4117.22  | 77    |
| H11C | 9049.38  | 3522.82  | 3955.42  | 77    |
| H12A | 10565.44 | 4250.09  | 5719.42  | 42    |
| H12B | 11143.31 | 3965.66  | 5201.17  | 42    |
| H13A | 11682.48 | 3195.6   | 5864.75  | 77    |
| H13B | 10994.33 | 3416.08  | 6364.47  | 77    |
| H13C | 12048.48 | 3755.76  | 6271.76  | 77    |
| H15  | 6094.59  | 4036.69  | 4384.7   | 49    |
| H16  | 4491.08  | 3608.09  | 3875.59  | 59    |
| H18  | 3909.15  | 3126.6   | 5574.36  | 56    |
| H19  | 5504.89  | 3561.11  | 6091.33  | 48    |
| H20A | 2622.83  | 2864.13  | 4631.14  | 104   |

|      |          |         |         |       |
|------|----------|---------|---------|-------|
| H20B | 3115.33  | 2793.67 | 4005.23 | 104   |
| H20C | 2475.5   | 3358.12 | 4109.82 | 104   |
| H22  | 7479.29  | 2947.39 | 5728.05 | 49    |
| H22A | 7646.04  | 2948.74 | 5718.61 | 49    |
| H23  | 7714.65  | 2022.91 | 6072.49 | 49    |
| H23A | 7925.76  | 2020.59 | 6077.11 | 49    |
| H25A | 8978.1   | 2561.37 | 7841.99 | 95    |
| H25B | 7822.03  | 2579.42 | 7865.17 | 54    |
| H26A | 8807.56  | 3488.26 | 7498.55 | 72    |
| H26B | 7978.79  | 3492.64 | 7483.88 | 47    |
| H27A | 7738.25  | 1460.67 | 7304.05 | 128   |
| H27B | 8999.83  | 1557.62 | 7603.71 | 128   |
| H27C | 8622.54  | 1347.45 | 6880.76 | 128   |
| H27D | 8587.6   | 1560.12 | 7775.51 | 80    |
| H27E | 8202.26  | 1304.21 | 7072.64 | 80    |
| H27F | 7320.34  | 1507.08 | 7464.08 | 80    |
| H3   | 9980(12) | 4166(6) | 6544(7) | 36(4) |
| H4   | 9524(12) | 4979(6) | 5466(7) | 34(4) |
| H5A  | 9548(14) | 5385(7) | 6803(8) | 47(4) |
| H6A  | 8542(12) | 4471(6) | 7449(7) | 37(4) |
| H7A  | 6297(13) | 4316(6) | 6729(7) | 40(4) |
| H8A  | 5937(14) | 5124(7) | 5608(8) | 42(4) |
| H9A  | 7870(12) | 5744(6) | 5639(7) | 34(4) |
| H10  | 7234(14) | 5472(7) | 6886(8) | 48(4) |

**Atomic Occupancy for 0538\_CG\_0m.**

| <b>Atom</b> | <b>Occupancy</b> | <b>Atom</b> | <b>Occupancy</b> | <b>Atom</b> | <b>Occupancy</b> |
|-------------|------------------|-------------|------------------|-------------|------------------|
| C21A        | 0.887(7)         | C21B        | 0.113(7)         | H22         | 0.887(7)         |
| H22A        | 0.113(7)         | H23         | 0.887(7)         | H23A        | 0.113(7)         |
| C24A        | 0.887(7)         | C24B        | 0.113(7)         | C25A        | 0.887(7)         |
| H25A        | 0.887(7)         | C25B        | 0.113(7)         | H25B        | 0.113(7)         |
| C26A        | 0.887(7)         | H26A        | 0.887(7)         | C26B        | 0.113(7)         |
| H26B        | 0.113(7)         | C27A        | 0.887(7)         | H27A        | 0.887(7)         |
| H27B        | 0.887(7)         | H27C        | 0.887(7)         | C27B        | 0.113(7)         |
| H27D        | 0.113(7)         | H27E        | 0.113(7)         | H27F        | 0.113(7)         |

**Solvent masks information for 0538\_CG\_0m.**

| <b>Number</b> | <b>X</b> | <b>Y</b> | <b>Z</b> | <b>Volume</b> | <b>Electron count</b> | <b>Content</b> |
|---------------|----------|----------|----------|---------------|-----------------------|----------------|
| 1             | 0.000    | 0.186    | 0.250    | 195.3         | 49.9                  | 0.5 Cl3HC      |
| 2             | 0.000    | -0.186   | 0.750    | 195.3         | 49.9                  | 0.5 Cl3HC      |
| 3             | 0.500    | 0.314    | 0.750    | 195.3         | 49.9                  | 0.5 Cl3HC      |

## Experimental

Single crystals of  $C_{27}H_{37}B_{10}NO$  [0538\_CG\_0m] were recrystallised from a mixture of chloroform and hexane by slow evaporation. A suitable crystal was selected and the crystal was mounted on a MITIGEN holder oil on a 'Bruker APEX-II CCD' diffractometer. The crystal was kept at 100.03 K during data collection. Using Olex2<sup>[2]</sup>, the structure was solved with the XT<sup>[3]</sup> structure solution program using Intrinsic Phasing and refined with the XL<sup>[4]</sup> refinement package using Least Squares minimisation.

### Crystal structure determination of 3aa

**Crystal Data** for  $C_{27}H_{38}B_{10}NO$  ( $M = 499.68$  g/mol): monoclinic, space group  $C2/c$  (no. 15),  $a = 12.5994(11)$  Å,  $b = 23.669(2)$  Å,  $c = 21.4198(18)$  Å,  $\beta = 102.169(3)^\circ$ ,  $V = 6244.2(9)$  Å<sup>3</sup>,  $Z = 8$ ,  $T = 100.03$  K,  $\mu(\text{CuK}\alpha) = 1.633$  mm<sup>-1</sup>,  $D_{\text{calc}} = 1.190$  g/cm<sup>3</sup>, 38084 reflections measured ( $7.47^\circ \leq 2\theta \leq 149.188^\circ$ ), 6321 unique ( $R_{\text{int}} = 0.0376$ ,  $R_{\text{sigma}} = 0.0261$ ) which were used in all calculations. The final  $R_1$  was 0.0515 ( $I > 2\sigma(I)$ ) and  $wR_2$  was 0.1455 (all data).

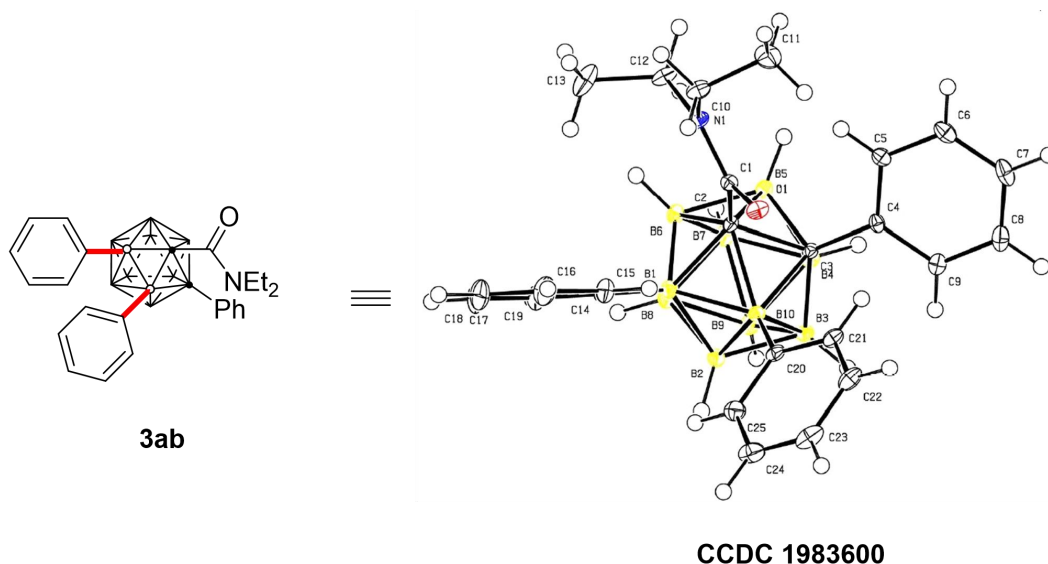

### Crystal data and structure refinement for 3ab.

|                     |                        |
|---------------------|------------------------|
| Identification code | mo_0922_CG_0m          |
| CCDC number         | 1983600                |
| Empirical formula   | $C_{25}H_{33}B_{10}NO$ |
| Formula weight      | 471.62                 |
| Temperature/K       | 100.0                  |

|                                             |                                                               |
|---------------------------------------------|---------------------------------------------------------------|
| Crystal system                              | monoclinic                                                    |
| Space group                                 | P2 <sub>1</sub> /n                                            |
| a/Å                                         | 13.6114(6)                                                    |
| b/Å                                         | 13.9152(8)                                                    |
| c/Å                                         | 14.1817(8)                                                    |
| α/°                                         | 90                                                            |
| β/°                                         | 93.358(2)                                                     |
| γ/°                                         | 90                                                            |
| Volume/Å <sup>3</sup>                       | 2681.5(2)                                                     |
| Z                                           | 4                                                             |
| ρ <sub>calc</sub> /cm <sup>3</sup>          | 1.168                                                         |
| μ/mm <sup>-1</sup>                          | 0.064                                                         |
| F(000)                                      | 992.0                                                         |
| Crystal size/mm <sup>3</sup>                | 0.405 × 0.28 × 0.122                                          |
| Radiation                                   | MoKα (λ = 0.71073)                                            |
| 2θ range for data collection/°              | 4.032 to 57.426                                               |
| Index ranges                                | -18 ≤ h ≤ 18, -18 ≤ k ≤ 18, -19 ≤ l ≤ 19                      |
| Reflections collected                       | 60954                                                         |
| Independent reflections                     | 6925 [R <sub>int</sub> = 0.0319, R <sub>sigma</sub> = 0.0183] |
| Data/restraints/parameters                  | 6925/0/368                                                    |
| Goodness-of-fit on F <sup>2</sup>           | 1.084                                                         |
| Final R indexes [I ≥ 2σ (I)]                | R <sub>1</sub> = 0.0425, wR <sub>2</sub> = 0.1089             |
| Final R indexes [all data]                  | R <sub>1</sub> = 0.0471, wR <sub>2</sub> = 0.1132             |
| Largest diff. peak/hole / e Å <sup>-3</sup> | 0.64/-0.21                                                    |

**Fractional Atomic Coordinates (×10<sup>4</sup>) and Equivalent Isotropic Displacement Parameters (Å<sup>2</sup>×10<sup>3</sup>) for mo\_0922\_CG\_0m. U<sub>eq</sub> is defined as 1/3 of of the trace of the orthogonalised U<sub>ij</sub> tensor.**

| Atom | x           | y         | z         | U(eq)     |
|------|-------------|-----------|-----------|-----------|
| O1   | 8016.6(5)   | 6425.9(6) | 6714.1(5) | 14.14(15) |
| N1   | 9458.3(6)   | 6888.7(6) | 6174.7(6) | 13.08(17) |
| C1   | 8524.9(7)   | 6572.4(7) | 6044.0(7) | 10.46(18) |
| C2   | 8029.1(7)   | 6388.6(7) | 5048.2(7) | 9.57(17)  |
| C3   | 7517.6(7)   | 5288.4(7) | 4869.4(7) | 9.65(17)  |
| C4   | 7706.9(7)   | 4469.4(7) | 5562.1(7) | 10.61(18) |
| C5   | 8580.6(7)   | 4390.0(7) | 6119.5(7) | 13.07(19) |
| C6   | 8756.6(8)   | 3589.2(8) | 6698.1(7) | 16.8(2)   |
| C7   | 8067.1(9)   | 2854.7(8) | 6718.4(8) | 18.7(2)   |
| C8   | 7198.2(8)   | 2929.3(8) | 6160.3(8) | 18.3(2)   |
| C9   | 7014.3(8)   | 3728.1(7) | 5584.6(7) | 15.2(2)   |
| C10  | 9787.5(8)   | 7080.1(8) | 7170.0(7) | 16.0(2)   |
| C11  | 10073.6(9)  | 6163.0(9) | 7705.3(8) | 23.2(2)   |
| C12  | 10206.1(7)  | 7070.8(8) | 5492.5(7) | 16.9(2)   |
| C13  | 10324.2(10) | 8138.0(9) | 5283.7(9) | 27.7(3)   |



|     |            |            |           |           |
|-----|------------|------------|-----------|-----------|
| C14 | 7317.6(7)  | 8329.2(7)  | 4927.1(7) | 12.72(19) |
| C15 | 7264.2(8)  | 8543.3(8)  | 5888.8(8) | 17.1(2)   |
| C16 | 7346.8(9)  | 9484.7(8)  | 6220.0(8) | 22.4(2)   |
| C17 | 7482.0(10) | 10235.2(8) | 5594.9(9) | 24.9(2)   |
| C18 | 7526.7(9)  | 10044.0(8) | 4637.3(9) | 23.9(2)   |
| C19 | 7448.2(8)  | 9103.3(8)  | 4308.1(8) | 17.7(2)   |
| C20 | 6044.8(7)  | 6325.4(7)  | 5957.2(7) | 11.94(19) |
| C21 | 6072.7(7)  | 5680.6(7)  | 6719.9(7) | 13.88(19) |
| C22 | 5392.3(8)  | 5733.0(8)  | 7414.2(8) | 18.3(2)   |
| C23 | 4664.1(8)  | 6433.5(9)  | 7363.4(8) | 21.4(2)   |
| C24 | 4626.3(8)  | 7085.5(8)  | 6623.8(9) | 21.5(2)   |
| C25 | 5308.9(8)  | 7031.9(8)  | 5927.4(8) | 16.5(2)   |
| B1  | 7285.4(8)  | 7272.2(8)  | 4517.7(7) | 11.0(2)   |
| B2  | 6286.1(8)  | 6622.8(8)  | 3940.2(8) | 12.1(2)   |
| B3  | 6435.8(8)  | 5383.6(8)  | 4187.7(8) | 11.1(2)   |
| B4  | 7528.0(8)  | 4986.6(8)  | 3686.6(8) | 11.8(2)   |
| B5  | 8534.0(8)  | 5616.5(8)  | 4252.1(8) | 11.1(2)   |
| B6  | 8372.8(8)  | 6855.1(8)  | 3994.5(8) | 12.0(2)   |
| B7  | 8064.9(8)  | 5980.5(8)  | 3120.4(8) | 12.8(2)   |
| B8  | 7284.5(8)  | 6993.5(8)  | 3275.6(8) | 12.9(2)   |
| B9  | 6764.1(8)  | 5841.0(8)  | 3074.6(8) | 12.8(2)   |
| B10 | 6717.2(8)  | 6256.3(8)  | 5089.4(7) | 10.10(19) |

**Anisotropic Displacement Parameters ( $\text{\AA}^2 \times 10^3$ ) for mo\_0922\_CG\_0m. The Anisotropic displacement factor exponent takes the form:  $-2\pi^2[\mathbf{h}^2\mathbf{a}^*2\mathbf{U}_{11}+2\mathbf{hka}^*\mathbf{b}^*\mathbf{U}_{12}+\dots]$ .**

| Atom | $U_{11}$ | $U_{22}$ | $U_{33}$ | $U_{23}$ | $U_{13}$ | $U_{12}$ |
|------|----------|----------|----------|----------|----------|----------|
| O1   | 12.1(3)  | 19.9(4)  | 10.5(3)  | -0.4(3)  | 0.8(3)   | -1.7(3)  |
| N1   | 10.7(4)  | 17.4(4)  | 11.0(4)  | -3.2(3)  | -0.2(3)  | -3.5(3)  |
| C1   | 10.7(4)  | 10.8(4)  | 9.7(4)   | -1.2(3)  | -0.8(3)  | 0.4(3)   |
| C2   | 9.6(4)   | 9.6(4)   | 9.4(4)   | -0.2(3)  | 0.1(3)   | -2.0(3)  |
| C3   | 9.4(4)   | 9.6(4)   | 9.8(4)   | -0.5(3)  | -0.3(3)  | -1.2(3)  |
| C4   | 13.0(4)  | 9.2(4)   | 9.8(4)   | 0.1(3)   | 2.3(3)   | 1.4(3)   |
| C5   | 13.6(4)  | 13.7(4)  | 12.0(4)  | -0.3(3)  | 1.1(3)   | 1.9(3)   |
| C6   | 19.8(5)  | 17.9(5)  | 12.7(5)  | 1.5(4)   | 1.0(4)   | 6.1(4)   |
| C7   | 28.8(6)  | 13.4(5)  | 14.5(5)  | 3.5(4)   | 6.2(4)   | 6.0(4)   |
| C8   | 24.1(5)  | 12.0(5)  | 19.5(5)  | 1.6(4)   | 6.2(4)   | -1.6(4)  |
| C9   | 16.8(5)  | 12.8(5)  | 16.0(5)  | 0.3(4)   | 1.8(4)   | -1.9(4)  |
| C10  | 13.7(4)  | 22.3(5)  | 11.6(4)  | -4.8(4)  | -2.4(3)  | -3.9(4)  |
| C11  | 24.5(5)  | 26.0(6)  | 18.0(5)  | -1.6(4)  | -7.6(4)  | 1.1(4)   |
| C12  | 10.5(4)  | 24.9(5)  | 15.6(5)  | -4.1(4)  | 2.4(3)   | -5.3(4)  |
| C13  | 33.9(6)  | 27.8(6)  | 21.8(6)  | -3.7(5)  | 4.7(5)   | -18.5(5) |
| C14  | 12.4(4)  | 10.5(4)  | 15.2(5)  | -0.6(4)  | 0.3(3)   | -1.4(3)  |
| C15  | 22.1(5)  | 13.5(5)  | 15.7(5)  | -0.5(4)  | 1.4(4)   | -3.1(4)  |
| C16  | 30.6(6)  | 17.4(5)  | 19.6(5)  | -5.2(4)  | 3.5(4)   | -4.7(4)  |

|     |         |         |         |          |         |         |
|-----|---------|---------|---------|----------|---------|---------|
| C17 | 34.2(6) | 12.0(5) | 28.6(6) | -5.2(4)  | 3.5(5)  | -4.6(4) |
| C18 | 33.4(6) | 12.2(5) | 26.1(6) | 2.9(4)   | 3.2(5)  | -4.3(4) |
| C19 | 23.0(5) | 13.9(5) | 16.2(5) | 1.1(4)   | 1.3(4)  | -2.5(4) |
| C20 | 9.6(4)  | 13.1(4) | 13.0(4) | -4.0(3)  | -0.1(3) | -2.9(3) |
| C21 | 12.6(4) | 16.1(5) | 13.0(4) | -2.9(4)  | 0.7(3)  | -3.5(3) |
| C22 | 18.8(5) | 22.8(5) | 13.7(5) | -5.1(4)  | 3.6(4)  | -8.7(4) |
| C23 | 16.9(5) | 27.4(6) | 20.8(5) | -13.9(4) | 7.8(4)  | -7.1(4) |
| C24 | 14.4(5) | 21.2(5) | 28.9(6) | -13.1(4) | 2.6(4)  | 0.5(4)  |
| C25 | 14.4(4) | 14.9(5) | 20.1(5) | -5.0(4)  | -0.8(4) | 0.2(4)  |
| B1  | 12.7(5) | 9.6(5)  | 10.6(5) | 1.0(4)   | -0.5(4) | -0.6(4) |
| B2  | 13.2(5) | 11.8(5) | 11.1(5) | 1.0(4)   | -2.2(4) | -0.8(4) |
| B3  | 10.5(4) | 12.0(5) | 10.4(5) | -0.9(4)  | -1.6(4) | -1.1(4) |
| B4  | 13.4(5) | 12.5(5) | 9.3(5)  | -1.2(4)  | 0.4(4)  | -1.0(4) |
| B5  | 11.6(5) | 11.6(5) | 10.1(5) | -0.4(4)  | 1.6(4)  | -1.2(4) |
| B6  | 13.5(5) | 12.5(5) | 10.0(5) | 1.1(4)   | 1.7(4)  | -2.1(4) |
| B7  | 15.5(5) | 13.0(5) | 9.8(5)  | 0.0(4)   | 0.8(4)  | -1.7(4) |
| B8  | 15.5(5) | 13.2(5) | 9.8(5)  | 1.5(4)   | -0.8(4) | -1.9(4) |
| B9  | 14.8(5) | 13.8(5) | 9.7(5)  | 0.2(4)   | -1.1(4) | -1.3(4) |
| B10 | 9.2(4)  | 10.5(5) | 10.4(5) | -0.3(4)  | -0.8(3) | -0.3(3) |

**Bond Lengths for mo\_0922\_CG\_0m.**

| Atom | Atom | Length/Å   | Atom | Atom | Length/Å   |
|------|------|------------|------|------|------------|
| O1   | C1   | 1.2249(12) | C18  | C19  | 1.3918(15) |
| N1   | C1   | 1.3471(12) | C20  | C21  | 1.4041(14) |
| N1   | C10  | 1.4799(12) | C20  | C25  | 1.4023(14) |
| N1   | C12  | 1.4669(13) | C20  | B10  | 1.5792(14) |
| C1   | C2   | 1.5503(13) | C21  | C22  | 1.3927(14) |
| C2   | C3   | 1.6947(13) | C22  | C23  | 1.3890(17) |
| C2   | B1   | 1.7358(14) | C23  | C24  | 1.3856(18) |
| C2   | B5   | 1.7298(14) | C24  | C25  | 1.3970(15) |
| C2   | B6   | 1.7191(14) | B1   | B2   | 1.7909(15) |
| C2   | B10  | 1.7995(14) | B1   | B6   | 1.7907(16) |
| C3   | C4   | 1.5169(13) | B1   | B8   | 1.8037(16) |
| C3   | B3   | 1.7187(14) | B1   | B10  | 1.8240(15) |
| C3   | B4   | 1.7300(14) | B2   | B3   | 1.7691(16) |
| C3   | B5   | 1.7409(14) | B2   | B8   | 1.7753(16) |
| C3   | B10  | 1.7715(14) | B2   | B9   | 1.7909(16) |
| C4   | C5   | 1.3933(13) | B2   | B10  | 1.7743(15) |
| C4   | C9   | 1.3990(14) | B3   | B4   | 1.7732(16) |
| C5   | C6   | 1.3961(14) | B3   | B9   | 1.7831(16) |
| C6   | C7   | 1.3890(16) | B3   | B10  | 1.7887(15) |
| C7   | C8   | 1.3880(16) | B4   | B5   | 1.7771(15) |
| C8   | C9   | 1.3932(15) | B4   | B7   | 1.7776(16) |

|     |     |            |    |    |            |
|-----|-----|------------|----|----|------------|
| C10 | C11 | 1.5237(16) | B4 | B9 | 1.7726(16) |
| C12 | C13 | 1.5246(17) | B5 | B6 | 1.7727(16) |
| C14 | C15 | 1.4020(14) | B5 | B7 | 1.7663(16) |
| C14 | C19 | 1.4073(14) | B6 | B7 | 1.7699(16) |
| C14 | B1  | 1.5810(14) | B6 | B8 | 1.7590(16) |
| C15 | C16 | 1.3939(15) | B7 | B8 | 1.7864(17) |
| C16 | C17 | 1.3891(17) | B7 | B9 | 1.7785(16) |
| C17 | C18 | 1.3887(18) | B8 | B9 | 1.7695(16) |

**Bond Angles for mo\_0922\_CG\_0m.**

| Atom | Atom | Atom | Angle/°   | Atom | Atom | Atom | Angle/°   |
|------|------|------|-----------|------|------|------|-----------|
| C1   | N1   | C10  | 114.86(8) | B10  | B2   | B9   | 109.94(8) |
| C1   | N1   | C12  | 130.62(8) | C3   | B3   | B2   | 105.76(7) |
| C12  | N1   | C10  | 114.51(8) | C3   | B3   | B4   | 59.37(6)  |
| O1   | C1   | N1   | 121.25(9) | C3   | B3   | B9   | 105.93(7) |
| O1   | C1   | C2   | 116.34(8) | C3   | B3   | B10  | 60.63(6)  |
| N1   | C1   | C2   | 122.40(8) | B2   | B3   | B4   | 108.28(8) |
| C1   | C2   | C3   | 116.00(7) | B2   | B3   | B9   | 60.55(6)  |
| C1   | C2   | B1   | 119.32(8) | B2   | B3   | B10  | 59.83(6)  |
| C1   | C2   | B5   | 121.91(8) | B4   | B3   | B9   | 59.79(6)  |
| C1   | C2   | B6   | 127.12(8) | B4   | B3   | B10  | 110.40(7) |
| C1   | C2   | B10  | 111.54(7) | B9   | B3   | B10  | 109.65(8) |
| C3   | C2   | B1   | 110.55(7) | C3   | B4   | B3   | 58.75(6)  |
| C3   | C2   | B5   | 61.10(6)  | C3   | B4   | B5   | 59.51(6)  |
| C3   | C2   | B6   | 109.96(7) | C3   | B4   | B7   | 106.02(7) |
| C3   | C2   | B10  | 60.84(6)  | C3   | B4   | B9   | 105.90(7) |
| B1   | C2   | B10  | 62.09(6)  | B3   | B4   | B5   | 107.91(7) |
| B5   | C2   | B1   | 113.64(7) | B3   | B4   | B7   | 108.37(8) |
| B5   | C2   | B10  | 112.99(7) | B5   | B4   | B7   | 59.59(6)  |
| B6   | C2   | B1   | 62.44(6)  | B9   | B4   | B3   | 60.38(6)  |
| B6   | C2   | B5   | 61.86(6)  | B9   | B4   | B5   | 107.73(8) |
| B6   | C2   | B10  | 112.82(7) | B9   | B4   | B7   | 60.13(6)  |
| C2   | C3   | B3   | 110.22(7) | C2   | B5   | C3   | 58.46(6)  |
| C2   | C3   | B4   | 109.74(7) | C2   | B5   | B4   | 106.01(7) |
| C2   | C3   | B5   | 60.45(6)  | C2   | B5   | B6   | 58.77(6)  |
| C2   | C3   | B10  | 62.51(6)  | C2   | B5   | B7   | 106.18(8) |
| C4   | C3   | C2   | 121.95(7) | C3   | B5   | B4   | 58.90(6)  |
| C4   | C3   | B3   | 121.98(8) | C3   | B5   | B6   | 105.44(7) |
| C4   | C3   | B4   | 115.77(8) | C3   | B5   | B7   | 106.05(7) |
| C4   | C3   | B5   | 114.39(7) | B6   | B5   | B4   | 107.68(8) |
| C4   | C3   | B10  | 122.69(8) | B7   | B5   | B4   | 60.22(6)  |
| B3   | C3   | B4   | 61.88(6)  | B7   | B5   | B6   | 60.01(6)  |
| B3   | C3   | B5   | 112.14(7) | C2   | B6   | B1   | 59.24(6)  |

|     |     |     |            |     |     |    |           |
|-----|-----|-----|------------|-----|-----|----|-----------|
| B3  | C3  | B10 | 61.64(6)   | C2  | B6  | B5 | 59.37(6)  |
| B4  | C3  | B5  | 61.59(6)   | C2  | B6  | B7 | 106.49(7) |
| B4  | C3  | B10 | 113.29(7)  | C2  | B6  | B8 | 106.40(7) |
| B5  | C3  | B10 | 113.84(7)  | B5  | B6  | B1 | 108.97(7) |
| C5  | C4  | C3  | 122.27(9)  | B7  | B6  | B1 | 110.21(8) |
| C5  | C4  | C9  | 118.85(9)  | B7  | B6  | B5 | 59.81(6)  |
| C9  | C4  | C3  | 118.66(9)  | B8  | B6  | B1 | 61.07(6)  |
| C4  | C5  | C6  | 120.53(10) | B8  | B6  | B5 | 108.41(8) |
| C7  | C6  | C5  | 120.44(10) | B8  | B6  | B7 | 60.82(6)  |
| C8  | C7  | C6  | 119.17(10) | B4  | B7  | B8 | 107.17(8) |
| C7  | C8  | C9  | 120.78(10) | B4  | B7  | B9 | 59.80(6)  |
| C8  | C9  | C4  | 120.23(10) | B5  | B7  | B4 | 60.19(6)  |
| N1  | C10 | C11 | 112.26(9)  | B5  | B7  | B6 | 60.17(6)  |
| N1  | C12 | C13 | 112.43(9)  | B5  | B7  | B8 | 107.47(8) |
| C15 | C14 | C19 | 117.38(9)  | B5  | B7  | B9 | 107.94(8) |
| C15 | C14 | B1  | 123.57(9)  | B6  | B7  | B4 | 107.78(8) |
| C19 | C14 | B1  | 119.00(9)  | B6  | B7  | B8 | 59.29(6)  |
| C16 | C15 | C14 | 121.31(10) | B6  | B7  | B9 | 107.16(8) |
| C17 | C16 | C15 | 120.17(11) | B9  | B7  | B8 | 59.52(6)  |
| C18 | C17 | C16 | 119.68(11) | B2  | B8  | B1 | 60.05(6)  |
| C17 | C18 | C19 | 120.09(11) | B2  | B8  | B7 | 108.38(8) |
| C18 | C19 | C14 | 121.37(10) | B6  | B8  | B1 | 60.33(6)  |
| C21 | C20 | B10 | 124.80(9)  | B6  | B8  | B2 | 107.78(7) |
| C25 | C20 | C21 | 117.28(9)  | B6  | B8  | B7 | 59.89(6)  |
| C25 | C20 | B10 | 117.69(9)  | B6  | B8  | B9 | 108.04(8) |
| C22 | C21 | C20 | 121.47(10) | B7  | B8  | B1 | 108.88(8) |
| C23 | C22 | C21 | 120.14(11) | B9  | B8  | B1 | 109.24(8) |
| C24 | C23 | C22 | 119.57(10) | B9  | B8  | B2 | 60.69(6)  |
| C23 | C24 | C25 | 120.23(10) | B9  | B8  | B7 | 60.02(6)  |
| C24 | C25 | C20 | 121.30(11) | B3  | B9  | B2 | 59.34(6)  |
| C2  | B1  | B2  | 104.41(7)  | B4  | B9  | B2 | 107.34(7) |
| C2  | B1  | B6  | 58.32(6)   | B4  | B9  | B3 | 59.83(6)  |
| C2  | B1  | B8  | 103.77(7)  | B4  | B9  | B7 | 60.08(6)  |
| C2  | B1  | B10 | 60.67(6)   | B7  | B9  | B2 | 108.03(8) |
| C14 | B1  | C2  | 119.80(8)  | B7  | B9  | B3 | 107.89(7) |
| C14 | B1  | B2  | 129.89(8)  | B8  | B9  | B2 | 59.81(6)  |
| C14 | B1  | B6  | 116.61(8)  | B8  | B9  | B3 | 107.44(8) |
| C14 | B1  | B8  | 123.85(8)  | B8  | B9  | B4 | 108.13(8) |
| C14 | B1  | B10 | 124.14(8)  | B8  | B9  | B7 | 60.46(6)  |
| B2  | B1  | B8  | 59.19(6)   | C2  | B10 | B1 | 57.24(6)  |
| B2  | B1  | B10 | 58.78(6)   | C3  | B10 | C2 | 56.66(5)  |
| B6  | B1  | B2  | 105.73(7)  | C3  | B10 | B1 | 103.28(7) |
| B6  | B1  | B8  | 58.60(6)   | C3  | B10 | B2 | 103.32(7) |
| B6  | B1  | B10 | 108.38(7)  | C3  | B10 | B3 | 57.73(6)  |
| B8  | B1  | B10 | 106.94(7)  | C20 | B10 | C2 | 129.84(8) |

|     |    |     |           |     |     |    |           |
|-----|----|-----|-----------|-----|-----|----|-----------|
| B1  | B2 | B9  | 108.86(8) | C20 | B10 | C3 | 125.03(8) |
| B3  | B2 | B1  | 109.00(7) | C20 | B10 | B1 | 125.41(8) |
| B3  | B2 | B8  | 107.80(8) | C20 | B10 | B2 | 121.52(8) |
| B3  | B2 | B9  | 60.11(6)  | C20 | B10 | B3 | 119.27(8) |
| B3  | B2 | B10 | 60.64(6)  | B2  | B10 | C2 | 102.49(7) |
| B8  | B2 | B1  | 60.77(6)  | B2  | B10 | B1 | 59.68(6)  |
| B8  | B2 | B9  | 59.50(6)  | B2  | B10 | B3 | 59.54(6)  |
| B10 | B2 | B1  | 61.54(6)  | B3  | B10 | C2 | 102.57(7) |
| B10 | B2 | B8  | 110.42(8) | B3  | B10 | B1 | 106.68(7) |

#### Torsion Angles for mo\_0922\_CG\_0m.

| A  | B  | C   | D   | Angle/°     | A  | B  | C   | D   | Angle/°     |
|----|----|-----|-----|-------------|----|----|-----|-----|-------------|
| O1 | C1 | C2  | C3  | -53.90(11)  | B3 | C3 | B10 | B2  | -40.03(7)   |
| O1 | C1 | C2  | B1  | 82.30(11)   | B3 | B2 | B8  | B1  | -102.24(8)  |
| O1 | C1 | C2  | B5  | -124.65(10) | B3 | B2 | B8  | B6  | -63.94(9)   |
| O1 | C1 | C2  | B6  | 158.38(9)   | B3 | B2 | B8  | B7  | -0.59(10)   |
| O1 | C1 | C2  | B10 | 13.12(12)   | B3 | B2 | B8  | B9  | 37.19(7)    |
| N1 | C1 | C2  | C3  | 127.00(9)   | B3 | B2 | B9  | B4  | -37.13(7)   |
| N1 | C1 | C2  | B1  | -96.80(11)  | B3 | B2 | B9  | B7  | -100.52(8)  |
| N1 | C1 | C2  | B5  | 56.25(13)   | B3 | B2 | B9  | B8  | -138.41(8)  |
| N1 | C1 | C2  | B6  | -20.72(15)  | B3 | B2 | B10 | C2  | 97.37(7)    |
| N1 | C1 | C2  | B10 | -165.98(9)  | B3 | B2 | B10 | C3  | 39.11(7)    |
| C1 | N1 | C10 | C11 | 79.51(11)   | B3 | B2 | B10 | C20 | -107.73(10) |
| C1 | N1 | C12 | C13 | 102.55(13)  | B3 | B2 | B10 | B1  | 136.87(8)   |
| C1 | C2 | C3  | C4  | -11.86(12)  | B3 | B4 | B5  | C2  | -1.43(10)   |
| C1 | C2 | C3  | B3  | 141.61(8)   | B3 | B4 | B5  | C3  | 34.60(7)    |
| C1 | C2 | C3  | B4  | -152.06(8)  | B3 | B4 | B5  | B6  | -63.10(9)   |
| C1 | C2 | C3  | B5  | -113.74(9)  | B3 | B4 | B5  | B7  | -101.21(8)  |
| C1 | C2 | C3  | B10 | 101.28(8)   | B3 | B4 | B7  | B5  | 100.42(8)   |
| C1 | C2 | B1  | C14 | 14.52(12)   | B3 | B4 | B7  | B6  | 62.21(9)    |
| C1 | C2 | B1  | B2  | -141.01(8)  | B3 | B4 | B7  | B8  | -0.26(10)   |
| C1 | C2 | B1  | B6  | 119.18(9)   | B3 | B4 | B7  | B9  | -37.69(7)   |
| C1 | C2 | B1  | B8  | 157.77(8)   | B3 | B4 | B9  | B2  | 36.92(7)    |
| C1 | C2 | B1  | B10 | -100.31(9)  | B3 | B4 | B9  | B7  | 138.13(8)   |
| C1 | C2 | B5  | C3  | 104.25(9)   | B3 | B4 | B9  | B8  | 100.04(8)   |
| C1 | C2 | B5  | B4  | 140.48(8)   | B4 | C3 | C4  | C5  | 108.65(10)  |
| C1 | C2 | B5  | B6  | -118.24(9)  | B4 | C3 | C4  | C9  | -65.98(11)  |
| C1 | C2 | B5  | B7  | -156.57(8)  | B4 | C3 | B3  | B2  | -102.22(8)  |
| C1 | C2 | B6  | B1  | -107.32(10) | B4 | C3 | B3  | B9  | -39.01(7)   |
| C1 | C2 | B6  | B5  | 110.31(10)  | B4 | C3 | B3  | B10 | -142.93(8)  |
| C1 | C2 | B6  | B7  | 148.61(9)   | B4 | C3 | B5  | C2  | 138.43(8)   |
| C1 | C2 | B6  | B8  | -147.68(9)  | B4 | C3 | B5  | B6  | 101.62(8)   |
| C1 | C2 | B10 | C3  | -108.63(8)  | B4 | C3 | B5  | B7  | 39.01(7)    |

|    |    |     |     |             |    |    |     |     |            |
|----|----|-----|-----|-------------|----|----|-----|-----|------------|
| C1 | C2 | B10 | C20 | 1.61(13)    | B4 | C3 | B10 | C2  | -100.99(8) |
| C1 | C2 | B10 | B1  | 112.74(8)   | B4 | C3 | B10 | C20 | 140.64(9)  |
| C1 | C2 | B10 | B2  | 153.51(8)   | B4 | C3 | B10 | B1  | -66.16(9)  |
| C1 | C2 | B10 | B3  | -145.35(8)  | B4 | C3 | B10 | B2  | -4.66(9)   |
| C2 | C3 | C4  | C5  | -29.35(13)  | B4 | C3 | B10 | B3  | 35.37(7)   |
| C2 | C3 | C4  | C9  | 156.02(9)   | B4 | B3 | B9  | B2  | -138.20(8) |
| C2 | C3 | B3  | B2  | -0.02(9)    | B4 | B3 | B9  | B7  | -37.44(7)  |
| C2 | C3 | B3  | B4  | 102.20(8)   | B4 | B3 | B9  | B8  | -101.23(8) |
| C2 | C3 | B3  | B9  | 63.19(9)    | B4 | B3 | B10 | C2  | 2.61(9)    |
| C2 | C3 | B3  | B10 | -40.72(7)   | B4 | B3 | B10 | C3  | -33.60(7)  |
| C2 | C3 | B4  | B3  | -102.97(8)  | B4 | B3 | B10 | C20 | -148.71(8) |
| C2 | C3 | B4  | B5  | 37.82(7)    | B4 | B3 | B10 | B1  | 61.81(9)   |
| C2 | C3 | B4  | B7  | -0.89(9)    | B4 | B3 | B10 | B2  | 99.84(8)   |
| C2 | C3 | B4  | B9  | -63.70(9)   | B4 | B5 | B6  | C2  | 98.35(8)   |
| C2 | C3 | B5  | B4  | -138.43(8)  | B4 | B5 | B6  | B1  | 64.66(9)   |
| C2 | C3 | B5  | B6  | -36.81(7)   | B4 | B5 | B6  | B7  | -38.21(7)  |
| C2 | C3 | B5  | B7  | -99.42(8)   | B4 | B5 | B6  | B8  | -0.21(10)  |
| C2 | C3 | B10 | C20 | -118.37(10) | B4 | B5 | B7  | B6  | 137.24(8)  |
| C2 | C3 | B10 | B1  | 34.83(6)    | B4 | B5 | B7  | B8  | 100.15(8)  |
| C2 | C3 | B10 | B2  | 96.33(7)    | B4 | B5 | B7  | B9  | 37.35(7)   |
| C2 | C3 | B10 | B3  | 136.35(7)   | B4 | B7 | B8  | B1  | 64.26(9)   |
| C2 | B1 | B2  | B3  | 2.60(10)    | B4 | B7 | B8  | B2  | 0.52(10)   |
| C2 | B1 | B2  | B8  | -97.64(8)   | B4 | B7 | B8  | B6  | 100.85(8)  |
| C2 | B1 | B2  | B9  | -61.33(9)   | B4 | B7 | B8  | B9  | -37.55(7)  |
| C2 | B1 | B2  | B10 | 41.66(7)    | B4 | B7 | B9  | B2  | 100.04(8)  |
| C2 | B1 | B6  | B5  | 33.74(7)    | B4 | B7 | B9  | B3  | 37.32(7)   |
| C2 | B1 | B6  | B7  | 97.63(8)    | B4 | B7 | B9  | B8  | 137.64(8)  |
| C2 | B1 | B6  | B8  | 134.78(8)   | B5 | C2 | C3  | C4  | 101.88(9)  |
| C2 | B1 | B8  | B2  | 98.75(8)    | B5 | C2 | C3  | B3  | -104.65(8) |
| C2 | B1 | B8  | B6  | -38.46(7)   | B5 | C2 | C3  | B4  | -38.32(7)  |
| C2 | B1 | B8  | B7  | -2.06(9)    | B5 | C2 | C3  | B10 | -144.98(7) |
| C2 | B1 | B8  | B9  | 61.84(9)    | B5 | C2 | B1  | C14 | -140.65(9) |
| C2 | B1 | B10 | C3  | -34.57(6)   | B5 | C2 | B1  | B2  | 63.82(9)   |
| C2 | B1 | B10 | C20 | 118.50(10)  | B5 | C2 | B1  | B6  | -35.99(7)  |
| C2 | B1 | B10 | B2  | -132.40(8)  | B5 | C2 | B1  | B8  | 2.60(10)   |
| C2 | B1 | B10 | B3  | -94.44(7)   | B5 | C2 | B1  | B10 | 104.51(8)  |
| C2 | B5 | B6  | B1  | -33.69(7)   | B5 | C2 | B6  | B1  | 142.38(8)  |
| C2 | B5 | B6  | B7  | -136.56(8)  | B5 | C2 | B6  | B7  | 38.31(7)   |
| C2 | B5 | B6  | B8  | -98.56(8)   | B5 | C2 | B6  | B8  | 102.02(8)  |
| C2 | B5 | B7  | B4  | -99.49(8)   | B5 | C2 | B10 | C3  | 33.07(7)   |
| C2 | B5 | B7  | B6  | 37.75(7)    | B5 | C2 | B10 | C20 | 143.31(10) |
| C2 | B5 | B7  | B8  | 0.66(10)    | B5 | C2 | B10 | B1  | -105.55(8) |
| C2 | B5 | B7  | B9  | -62.14(9)   | B5 | C2 | B10 | B2  | -64.79(9)  |
| C2 | B6 | B7  | B4  | 0.12(10)    | B5 | C2 | B10 | B3  | -3.65(9)   |
| C2 | B6 | B7  | B5  | -38.10(7)   | B5 | C3 | C4  | C5  | 39.82(12)  |

|    |    |     |     |            |    |    |     |     |            |
|----|----|-----|-----|------------|----|----|-----|-----|------------|
| C2 | B6 | B7  | B8  | 99.91(8)   | B5 | C3 | C4  | C9  | -134.81(9) |
| C2 | B6 | B7  | B9  | 63.12(9)   | B5 | C3 | B3  | B2  | -65.33(9)  |
| C2 | B6 | B8  | B1  | 39.48(7)   | B5 | C3 | B3  | B4  | 36.89(7)   |
| C2 | B6 | B8  | B2  | 1.30(10)   | B5 | C3 | B3  | B9  | -2.12(10)  |
| C2 | B6 | B8  | B7  | -100.05(8) | B5 | C3 | B3  | B10 | -106.04(8) |
| C2 | B6 | B8  | B9  | -62.84(9)  | B5 | C3 | B4  | B3  | -140.79(8) |
| C3 | C2 | B1  | C14 | 152.89(8)  | B5 | C3 | B4  | B7  | -38.71(7)  |
| C3 | C2 | B1  | B2  | -2.64(9)   | B5 | C3 | B4  | B9  | -101.52(8) |
| C3 | C2 | B1  | B6  | -102.45(8) | B5 | C3 | B10 | C2  | -33.08(7)  |
| C3 | C2 | B1  | B8  | -63.86(9)  | B5 | C3 | B10 | C20 | -151.45(8) |
| C3 | C2 | B1  | B10 | 38.05(7)   | B5 | C3 | B10 | B1  | 1.75(9)    |
| C3 | C2 | B5  | B4  | 36.23(7)   | B5 | C3 | B10 | B2  | 63.25(9)   |
| C3 | C2 | B5  | B6  | 137.51(7)  | B5 | C3 | B10 | B3  | 103.28(8)  |
| C3 | C2 | B5  | B7  | 99.18(8)   | B5 | B4 | B7  | B6  | -38.21(7)  |
| C3 | C2 | B6  | B1  | 103.39(8)  | B5 | B4 | B7  | B8  | -100.67(8) |
| C3 | C2 | B6  | B5  | -38.98(7)  | B5 | B4 | B7  | B9  | -138.10(8) |
| C3 | C2 | B6  | B7  | -0.68(10)  | B5 | B4 | B9  | B2  | -64.01(9)  |
| C3 | C2 | B6  | B8  | 63.04(9)   | B5 | B4 | B9  | B3  | -100.93(8) |
| C3 | C2 | B10 | C20 | 110.24(11) | B5 | B4 | B9  | B7  | 37.20(7)   |
| C3 | C2 | B10 | B1  | -138.62(7) | B5 | B4 | B9  | B8  | -0.89(10)  |
| C3 | C2 | B10 | B2  | -97.86(7)  | B5 | B6 | B7  | B4  | 38.22(7)   |
| C3 | C2 | B10 | B3  | -36.72(6)  | B5 | B6 | B7  | B8  | 138.01(8)  |
| C3 | C4 | C5  | C6  | -175.31(9) | B5 | B6 | B7  | B9  | 101.22(8)  |
| C3 | C4 | C9  | C8  | 175.18(9)  | B5 | B6 | B8  | B1  | 101.97(8)  |
| C3 | B3 | B4  | B5  | -34.92(7)  | B5 | B6 | B8  | B2  | 63.79(10)  |
| C3 | B3 | B4  | B7  | -97.97(8)  | B5 | B6 | B8  | B7  | -37.55(7)  |
| C3 | B3 | B4  | B9  | -135.54(8) | B5 | B6 | B8  | B9  | -0.34(10)  |
| C3 | B3 | B9  | B2  | -99.39(8)  | B5 | B7 | B8  | B1  | 0.89(10)   |
| C3 | B3 | B9  | B4  | 38.81(7)   | B5 | B7 | B8  | B2  | -62.84(9)  |
| C3 | B3 | B9  | B7  | 1.38(10)   | B5 | B7 | B8  | B6  | 37.48(7)   |
| C3 | B3 | B9  | B8  | -62.42(9)  | B5 | B7 | B8  | B9  | -100.92(8) |
| C3 | B3 | B10 | C2  | 36.21(6)   | B5 | B7 | B9  | B2  | 62.52(10)  |
| C3 | B3 | B10 | C20 | -115.11(9) | B5 | B7 | B9  | B3  | -0.20(10)  |
| C3 | B3 | B10 | B1  | 95.42(7)   | B5 | B7 | B9  | B4  | -37.52(7)  |
| C3 | B3 | B10 | B2  | 133.44(8)  | B5 | B7 | B9  | B8  | 100.12(8)  |
| C3 | B4 | B5  | C2  | -36.03(7)  | B6 | C2 | C3  | C4  | 141.20(8)  |
| C3 | B4 | B5  | B6  | -97.70(8)  | B6 | C2 | C3  | B3  | -65.33(9)  |
| C3 | B4 | B5  | B7  | -135.81(8) | B6 | C2 | C3  | B4  | 1.00(9)    |
| C3 | B4 | B7  | B5  | 38.67(7)   | B6 | C2 | C3  | B5  | 39.32(7)   |
| C3 | B4 | B7  | B6  | 0.46(10)   | B6 | C2 | C3  | B10 | -105.66(8) |
| C3 | B4 | B7  | B8  | -62.00(9)  | B6 | C2 | B1  | C14 | -104.67(9) |
| C3 | B4 | B7  | B9  | -99.43(8)  | B6 | C2 | B1  | B2  | 99.80(8)   |
| C3 | B4 | B9  | B2  | -1.59(10)  | B6 | C2 | B1  | B8  | 38.59(7)   |
| C3 | B4 | B9  | B3  | -38.50(7)  | B6 | C2 | B1  | B10 | 140.50(7)  |
| C3 | B4 | B9  | B7  | 99.63(8)   | B6 | C2 | B5  | C3  | -137.51(7) |

|     |     |     |     |             |    |    |     |     |             |
|-----|-----|-----|-----|-------------|----|----|-----|-----|-------------|
| C3  | B4  | B9  | B8  | 61.54(9)    | B6 | C2 | B5  | B4  | -101.28(8)  |
| C3  | B5  | B6  | C2  | 36.67(6)    | B6 | C2 | B5  | B7  | -38.33(7)   |
| C3  | B5  | B6  | B1  | 2.98(9)     | B6 | C2 | B10 | C3  | 100.91(8)   |
| C3  | B5  | B6  | B7  | -99.89(8)   | B6 | C2 | B10 | C20 | -148.85(10) |
| C3  | B5  | B6  | B8  | -61.89(9)   | B6 | C2 | B10 | B1  | -37.72(7)   |
| C3  | B5  | B7  | B4  | -38.39(7)   | B6 | C2 | B10 | B2  | 3.04(10)    |
| C3  | B5  | B7  | B6  | 98.85(8)    | B6 | C2 | B10 | B3  | 64.19(9)    |
| C3  | B5  | B7  | B8  | 61.76(9)    | B6 | B1 | B2  | B3  | 63.20(9)    |
| C3  | B5  | B7  | B9  | -1.05(10)   | B6 | B1 | B2  | B8  | -37.04(7)   |
| C4  | C3  | B3  | B2  | 153.45(8)   | B6 | B1 | B2  | B9  | -0.73(10)   |
| C4  | C3  | B3  | B4  | -104.33(9)  | B6 | B1 | B2  | B10 | 102.26(8)   |
| C4  | C3  | B3  | B9  | -143.34(8)  | B6 | B1 | B8  | B2  | 137.21(8)   |
| C4  | C3  | B3  | B10 | 112.74(9)   | B6 | B1 | B8  | B7  | 36.40(7)    |
| C4  | C3  | B4  | B3  | 114.13(9)   | B6 | B1 | B8  | B9  | 100.29(8)   |
| C4  | C3  | B4  | B5  | -105.08(9)  | B6 | B1 | B10 | C2  | 34.78(7)    |
| C4  | C3  | B4  | B7  | -143.79(8)  | B6 | B1 | B10 | C3  | 0.21(9)     |
| C4  | C3  | B4  | B9  | 153.41(8)   | B6 | B1 | B10 | C20 | 153.28(9)   |
| C4  | C3  | B5  | C2  | -114.26(8)  | B6 | B1 | B10 | B2  | -97.62(8)   |
| C4  | C3  | B5  | B4  | 107.31(9)   | B6 | B1 | B10 | B3  | -59.66(9)   |
| C4  | C3  | B5  | B6  | -151.07(8)  | B6 | B5 | B7  | B4  | -137.24(8)  |
| C4  | C3  | B5  | B7  | 146.32(8)   | B6 | B5 | B7  | B8  | -37.09(7)   |
| C4  | C3  | B10 | C2  | 112.01(9)   | B6 | B5 | B7  | B9  | -99.89(8)   |
| C4  | C3  | B10 | C20 | -6.36(13)   | B6 | B7 | B8  | B1  | -36.59(7)   |
| C4  | C3  | B10 | B1  | 146.84(8)   | B6 | B7 | B8  | B2  | -100.33(8)  |
| C4  | C3  | B10 | B2  | -151.66(8)  | B6 | B7 | B8  | B9  | -138.40(8)  |
| C4  | C3  | B10 | B3  | -111.63(9)  | B6 | B7 | B9  | B2  | -0.92(10)   |
| C4  | C5  | C6  | C7  | 0.71(15)    | B6 | B7 | B9  | B3  | -63.63(9)   |
| C5  | C4  | C9  | C8  | 0.36(15)    | B6 | B7 | B9  | B4  | -100.96(8)  |
| C5  | C6  | C7  | C8  | -0.37(16)   | B6 | B7 | B9  | B8  | 36.68(7)    |
| C6  | C7  | C8  | C9  | 0.04(16)    | B6 | B8 | B9  | B2  | 100.68(8)   |
| C7  | C8  | C9  | C4  | -0.04(16)   | B6 | B8 | B9  | B3  | 63.92(9)    |
| C9  | C4  | C5  | C6  | -0.70(14)   | B6 | B8 | B9  | B4  | 0.76(10)    |
| C10 | N1  | C1  | O1  | -2.63(14)   | B6 | B8 | B9  | B7  | -37.16(7)   |
| C10 | N1  | C1  | C2  | 176.42(9)   | B7 | B4 | B5  | C2  | 99.78(8)    |
| C10 | N1  | C12 | C13 | -77.80(12)  | B7 | B4 | B5  | C3  | 135.81(8)   |
| C12 | N1  | C1  | O1  | 177.02(10)  | B7 | B4 | B5  | B6  | 38.11(7)    |
| C12 | N1  | C1  | C2  | -3.92(16)   | B7 | B4 | B9  | B2  | -101.21(8)  |
| C12 | N1  | C10 | C11 | -100.20(11) | B7 | B4 | B9  | B3  | -138.13(8)  |
| C14 | C15 | C16 | C17 | 0.19(18)    | B7 | B4 | B9  | B8  | -38.09(7)   |
| C14 | B1  | B2  | B3  | -149.46(10) | B7 | B5 | B6  | C2  | 136.56(8)   |
| C14 | B1  | B2  | B8  | 110.30(11)  | B7 | B5 | B6  | B1  | 102.87(8)   |
| C14 | B1  | B2  | B9  | 146.60(10)  | B7 | B5 | B6  | B8  | 38.00(7)    |
| C14 | B1  | B2  | B10 | -110.40(11) | B7 | B6 | B8  | B1  | 139.53(8)   |
| C14 | B1  | B6  | C2  | 110.12(9)   | B7 | B6 | B8  | B2  | 101.35(8)   |
| C14 | B1  | B6  | B5  | 143.86(8)   | B7 | B6 | B8  | B9  | 37.21(7)    |



|     |     |     |     |             |    |    |     |     |            |
|-----|-----|-----|-----|-------------|----|----|-----|-----|------------|
| C14 | B1  | B6  | B7  | -152.25(8)  | B7 | B8 | B9  | B2  | 137.84(8)  |
| C14 | B1  | B6  | B8  | -115.10(9)  | B7 | B8 | B9  | B3  | 101.08(8)  |
| C14 | B1  | B8  | B2  | -119.94(10) | B7 | B8 | B9  | B4  | 37.92(7)   |
| C14 | B1  | B8  | B6  | 102.85(10)  | B8 | B1 | B2  | B3  | 100.24(8)  |
| C14 | B1  | B8  | B7  | 139.25(9)   | B8 | B1 | B2  | B9  | 36.31(7)   |
| C14 | B1  | B8  | B9  | -156.86(9)  | B8 | B1 | B2  | B10 | 139.30(8)  |
| C14 | B1  | B10 | C2  | -107.92(10) | B8 | B1 | B6  | C2  | -134.78(8) |
| C14 | B1  | B10 | C3  | -142.49(9)  | B8 | B1 | B6  | B5  | -101.04(8) |
| C14 | B1  | B10 | C20 | 10.58(14)   | B8 | B1 | B6  | B7  | -37.15(7)  |
| C14 | B1  | B10 | B2  | 119.68(10)  | B8 | B1 | B10 | C2  | 96.56(8)   |
| C14 | B1  | B10 | B3  | 157.64(8)   | B8 | B1 | B10 | C3  | 62.00(8)   |
| C15 | C14 | C19 | C18 | 0.33(16)    | B8 | B1 | B10 | C20 | -144.94(9) |
| C15 | C14 | B1  | C2  | -48.00(13)  | B8 | B1 | B10 | B2  | -35.84(7)  |
| C15 | C14 | B1  | B2  | 100.47(13)  | B8 | B1 | B10 | B3  | 2.13(9)    |
| C15 | C14 | B1  | B6  | -115.05(11) | B8 | B2 | B3  | C3  | 62.77(9)   |
| C15 | C14 | B1  | B8  | 176.40(9)   | B8 | B2 | B3  | B4  | 0.43(10)   |
| C15 | C14 | B1  | B10 | 24.92(14)   | B8 | B2 | B3  | B9  | -36.92(7)  |
| C15 | C16 | C17 | C18 | 0.51(19)    | B8 | B2 | B3  | B10 | 103.87(8)  |
| C16 | C17 | C18 | C19 | -0.8(2)     | B8 | B2 | B9  | B3  | 138.41(8)  |
| C17 | C18 | C19 | C14 | 0.35(18)    | B8 | B2 | B9  | B4  | 101.28(8)  |
| C19 | C14 | C15 | C16 | -0.60(16)   | B8 | B2 | B9  | B7  | 37.89(7)   |
| C19 | C14 | B1  | C2  | 129.20(10)  | B8 | B2 | B10 | C2  | -2.11(10)  |
| C19 | C14 | B1  | B2  | -82.32(13)  | B8 | B2 | B10 | C3  | -60.37(9)  |
| C19 | C14 | B1  | B6  | 62.15(12)   | B8 | B2 | B10 | C20 | 152.78(9)  |
| C19 | C14 | B1  | B8  | -6.40(14)   | B8 | B2 | B10 | B1  | 37.39(7)   |
| C19 | C14 | B1  | B10 | -157.88(9)  | B8 | B2 | B10 | B3  | -99.49(8)  |
| C20 | C21 | C22 | C23 | 0.02(15)    | B8 | B6 | B7  | B4  | -99.79(8)  |
| C21 | C20 | C25 | C24 | -0.59(15)   | B8 | B6 | B7  | B5  | -138.01(8) |
| C21 | C20 | B10 | C2  | -65.91(14)  | B8 | B6 | B7  | B9  | -36.78(7)  |
| C21 | C20 | B10 | C3  | 7.27(14)    | B8 | B7 | B9  | B2  | -37.60(7)  |
| C21 | C20 | B10 | B1  | -140.15(10) | B8 | B7 | B9  | B3  | -100.31(8) |
| C21 | C20 | B10 | B2  | 146.74(9)   | B8 | B7 | B9  | B4  | -137.64(8) |
| C21 | C20 | B10 | B3  | 76.50(12)   | B9 | B2 | B3  | C3  | 99.69(8)   |
| C21 | C22 | C23 | C24 | -0.72(16)   | B9 | B2 | B3  | B4  | 37.35(7)   |
| C22 | C23 | C24 | C25 | 0.75(16)    | B9 | B2 | B3  | B10 | 140.79(8)  |
| C23 | C24 | C25 | C20 | -0.09(16)   | B9 | B2 | B8  | B1  | -139.43(8) |
| C25 | C20 | C21 | C22 | 0.62(14)    | B9 | B2 | B8  | B6  | -101.12(8) |
| C25 | C20 | B10 | C2  | 119.81(11)  | B9 | B2 | B8  | B7  | -37.78(7)  |
| C25 | C20 | B10 | C3  | -167.01(9)  | B9 | B2 | B10 | C2  | 61.71(9)   |
| C25 | C20 | B10 | B1  | 45.56(13)   | B9 | B2 | B10 | C3  | 3.45(9)    |
| C25 | C20 | B10 | B2  | -27.54(13)  | B9 | B2 | B10 | C20 | -143.40(9) |
| C25 | C20 | B10 | B3  | -97.78(11)  | B9 | B2 | B10 | B1  | 101.21(8)  |
| B1  | C2  | C3  | C4  | -151.73(8)  | B9 | B2 | B10 | B3  | -35.66(7)  |
| B1  | C2  | C3  | B3  | 1.74(10)    | B9 | B3 | B4  | C3  | 135.54(8)  |
| B1  | C2  | C3  | B4  | 68.07(9)    | B9 | B3 | B4  | B5  | 100.63(8)  |

|    |     |     |     |             |     |    |     |     |             |
|----|-----|-----|-----|-------------|-----|----|-----|-----|-------------|
| B1 | C2  | C3  | B5  | 106.39(8)   | B9  | B3 | B4  | B7  | 37.58(7)    |
| B1 | C2  | C3  | B10 | -38.59(7)   | B9  | B3 | B10 | C2  | -61.47(9)   |
| B1 | C2  | B5  | C3  | -101.30(8)  | B9  | B3 | B10 | C3  | -97.68(8)   |
| B1 | C2  | B5  | B4  | -65.07(9)   | B9  | B3 | B10 | C20 | 147.21(8)   |
| B1 | C2  | B5  | B6  | 36.21(7)    | B9  | B3 | B10 | B1  | -2.26(10)   |
| B1 | C2  | B5  | B7  | -2.12(10)   | B9  | B3 | B10 | B2  | 35.77(7)    |
| B1 | C2  | B6  | B5  | -142.38(7)  | B9  | B4 | B5  | C2  | 62.34(9)    |
| B1 | C2  | B6  | B7  | -104.07(8)  | B9  | B4 | B5  | C3  | 98.37(8)    |
| B1 | C2  | B6  | B8  | -40.36(7)   | B9  | B4 | B5  | B6  | 0.67(10)    |
| B1 | C2  | B10 | C3  | 138.62(7)   | B9  | B4 | B5  | B7  | -37.44(7)   |
| B1 | C2  | B10 | C20 | -111.13(11) | B9  | B4 | B7  | B5  | 138.10(8)   |
| B1 | C2  | B10 | B2  | 40.76(7)    | B9  | B4 | B7  | B6  | 99.89(8)    |
| B1 | C2  | B10 | B3  | 101.90(8)   | B9  | B4 | B7  | B8  | 37.43(7)    |
| B1 | C14 | C15 | C16 | 176.64(10)  | B9  | B7 | B8  | B1  | 101.82(8)   |
| B1 | C14 | C19 | C18 | -177.04(10) | B9  | B7 | B8  | B2  | 38.08(7)    |
| B1 | B2  | B3  | C3  | -1.64(10)   | B9  | B7 | B8  | B6  | 138.40(8)   |
| B1 | B2  | B3  | B4  | -63.98(9)   | B10 | C2 | C3  | C4  | -113.14(9)  |
| B1 | B2  | B3  | B9  | -101.33(8)  | B10 | C2 | C3  | B3  | 40.33(7)    |
| B1 | B2  | B3  | B10 | 39.46(7)    | B10 | C2 | C3  | B4  | 106.66(8)   |
| B1 | B2  | B8  | B6  | 38.31(7)    | B10 | C2 | C3  | B5  | 144.98(7)   |
| B1 | B2  | B8  | B7  | 101.65(8)   | B10 | C2 | B1  | C14 | 114.83(10)  |
| B1 | B2  | B8  | B9  | 139.43(8)   | B10 | C2 | B1  | B2  | -40.70(7)   |
| B1 | B2  | B9  | B3  | 101.56(8)   | B10 | C2 | B1  | B6  | -140.50(7)  |
| B1 | B2  | B9  | B4  | 64.43(9)    | B10 | C2 | B1  | B8  | -101.91(7)  |
| B1 | B2  | B9  | B7  | 1.04(10)    | B10 | C2 | B5  | C3  | -32.98(7)   |
| B1 | B2  | B9  | B8  | -36.85(7)   | B10 | C2 | B5  | B4  | 3.25(10)    |
| B1 | B2  | B10 | C2  | -39.50(6)   | B10 | C2 | B5  | B6  | 104.53(8)   |
| B1 | B2  | B10 | C3  | -97.76(7)   | B10 | C2 | B5  | B7  | 66.21(9)    |
| B1 | B2  | B10 | C20 | 115.39(10)  | B10 | C2 | B6  | B1  | 37.58(7)    |
| B1 | B2  | B10 | B3  | -136.87(8)  | B10 | C2 | B6  | B5  | -104.80(8)  |
| B1 | B6  | B7  | B4  | -62.53(10)  | B10 | C2 | B6  | B7  | -66.49(9)   |
| B1 | B6  | B7  | B5  | -100.75(8)  | B10 | C2 | B6  | B8  | -2.78(10)   |
| B1 | B6  | B7  | B8  | 37.26(7)    | B10 | C3 | C4  | C5  | -105.09(11) |
| B1 | B6  | B7  | B9  | 0.47(10)    | B10 | C3 | C4  | C9  | 80.28(11)   |
| B1 | B6  | B8  | B2  | -38.18(7)   | B10 | C3 | B3  | B2  | 40.71(7)    |
| B1 | B6  | B8  | B7  | -139.53(8)  | B10 | C3 | B3  | B4  | 142.93(8)   |
| B1 | B6  | B8  | B9  | -102.32(8)  | B10 | C3 | B3  | B9  | 103.92(8)   |
| B1 | B8  | B9  | B2  | 36.64(7)    | B10 | C3 | B4  | B3  | -35.28(7)   |
| B1 | B8  | B9  | B3  | -0.12(10)   | B10 | C3 | B4  | B5  | 105.52(8)   |
| B1 | B8  | B9  | B4  | -63.28(10)  | B10 | C3 | B4  | B7  | 66.80(9)    |
| B1 | B8  | B9  | B7  | -101.20(8)  | B10 | C3 | B4  | B9  | 4.00(10)    |
| B2 | B1  | B6  | C2  | -97.47(8)   | B10 | C3 | B5  | C2  | 33.82(7)    |
| B2 | B1  | B6  | B5  | -63.73(9)   | B10 | C3 | B5  | B4  | -104.62(8)  |
| B2 | B1  | B6  | B7  | 0.16(10)    | B10 | C3 | B5  | B6  | -3.00(10)   |
| B2 | B1  | B6  | B8  | 37.31(7)    | B10 | C3 | B5  | B7  | -65.60(9)   |

|    |    |     |     |             |     |     |     |     |            |
|----|----|-----|-----|-------------|-----|-----|-----|-----|------------|
| B2 | B1 | B8  | B6  | -137.21(8)  | B10 | C20 | C21 | C22 | -173.69(9) |
| B2 | B1 | B8  | B7  | -100.81(8)  | B10 | C20 | C25 | C24 | 174.13(9)  |
| B2 | B1 | B8  | B9  | -36.91(7)   | B10 | B1  | B2  | B3  | -39.06(7)  |
| B2 | B1 | B10 | C2  | 132.40(8)   | B10 | B1  | B2  | B8  | -139.30(8) |
| B2 | B1 | B10 | C3  | 97.83(7)    | B10 | B1  | B2  | B9  | -102.99(8) |
| B2 | B1 | B10 | C20 | -109.10(10) | B10 | B1  | B6  | C2  | -35.76(7)  |
| B2 | B1 | B10 | B3  | 37.96(7)    | B10 | B1  | B6  | B5  | -2.01(10)  |
| B2 | B3 | B4  | C3  | 97.86(8)    | B10 | B1  | B6  | B7  | 61.88(9)   |
| B2 | B3 | B4  | B5  | 62.95(9)    | B10 | B1  | B6  | B8  | 99.03(8)   |
| B2 | B3 | B4  | B7  | -0.10(10)   | B10 | B1  | B8  | B2  | 35.66(7)   |
| B2 | B3 | B4  | B9  | -37.68(7)   | B10 | B1  | B8  | B6  | -101.55(8) |
| B2 | B3 | B9  | B4  | 138.20(8)   | B10 | B1  | B8  | B7  | -65.15(9)  |
| B2 | B3 | B9  | B7  | 100.76(8)   | B10 | B1  | B8  | B9  | -1.26(10)  |
| B2 | B3 | B9  | B8  | 36.97(7)    | B10 | B2  | B3  | C3  | -41.11(7)  |
| B2 | B3 | B10 | C2  | -97.23(7)   | B10 | B2  | B3  | B4  | -103.44(8) |
| B2 | B3 | B10 | C3  | -133.44(8)  | B10 | B2  | B3  | B9  | -140.79(8) |
| B2 | B3 | B10 | C20 | 111.45(9)   | B10 | B2  | B8  | B1  | -37.71(7)  |
| B2 | B3 | B10 | B1  | -38.03(7)   | B10 | B2  | B8  | B6  | 0.60(11)   |
| B2 | B8 | B9  | B3  | -36.76(7)   | B10 | B2  | B8  | B7  | 63.94(10)  |
| B2 | B8 | B9  | B4  | -99.92(8)   | B10 | B2  | B8  | B9  | 101.72(8)  |
| B2 | B8 | B9  | B7  | -137.84(8)  | B10 | B2  | B9  | B3  | 35.88(7)   |
| B3 | C3 | C4  | C5  | -179.74(9)  | B10 | B2  | B9  | B4  | -1.25(10)  |
| B3 | C3 | C4  | C9  | 5.63(13)    | B10 | B2  | B9  | B7  | -64.64(10) |
| B3 | C3 | B4  | B5  | 140.79(8)   | B10 | B2  | B9  | B8  | -102.53(8) |
| B3 | C3 | B4  | B7  | 102.08(8)   | B10 | B3  | B4  | C3  | 34.09(7)   |
| B3 | C3 | B4  | B9  | 39.28(7)    | B10 | B3  | B4  | B5  | -0.83(10)  |
| B3 | C3 | B5  | C2  | 101.43(8)   | B10 | B3  | B4  | B7  | -63.88(9)  |
| B3 | C3 | B5  | B4  | -37.01(7)   | B10 | B3  | B4  | B9  | -101.45(8) |
| B3 | C3 | B5  | B6  | 64.62(9)    | B10 | B3  | B9  | B2  | -35.47(7)  |
| B3 | C3 | B5  | B7  | 2.01(10)    | B10 | B3  | B9  | B4  | 102.73(8)  |
| B3 | C3 | B10 | C2  | -136.35(7)  | B10 | B3  | B9  | B7  | 65.30(9)   |
| B3 | C3 | B10 | C20 | 105.27(10)  | B10 | B3  | B9  | B8  | 1.50(10)   |
| B3 | C3 | B10 | B1  | -101.53(7)  |     |     |     |     |            |

**Hydrogen Atom Coordinates ( $\text{\AA}\times 10^4$ ) and Isotropic Displacement Parameters ( $\text{\AA}^2\times 10^3$ ) for mo\_0922\_CG\_0m.**

| Atom | x        | y       | z       | U(eq) |
|------|----------|---------|---------|-------|
| H5   | 9060.51  | 4884.74 | 6105.74 | 16    |
| H6   | 9351.84  | 3546.46 | 7080.44 | 20    |
| H7   | 8188.81  | 2308.18 | 7109.4  | 22    |
| H8   | 6723.22  | 2429.78 | 6171.04 | 22    |
| H9   | 6416.56  | 3769.61 | 5205.92 | 18    |
| H10A | 9251.47  | 7404.75 | 7489.17 | 19    |
| H10B | 10359.92 | 7519.99 | 7186.77 | 19    |

|      |          |          |          |       |
|------|----------|----------|----------|-------|
| H11A | 10578.22 | 5820.22  | 7372.25  | 35    |
| H11B | 9492.81  | 5751.92  | 7744.09  | 35    |
| H11C | 10333.9  | 6327.13  | 8344.01  | 35    |
| H12A | 10020.35 | 6728.48  | 4896.55  | 20    |
| H12B | 10845.19 | 6809.55  | 5744.46  | 20    |
| H13A | 10810.19 | 8222.14  | 4807.15  | 42    |
| H13B | 10547.75 | 8474.56  | 5864.23  | 42    |
| H13C | 9690.46  | 8403.39  | 5045.44  | 42    |
| H15  | 7169.87  | 8036.67  | 6323.35  | 21    |
| H16  | 7310.53  | 9613.28  | 6874.96  | 27    |
| H17  | 7543.55  | 10876.13 | 5821.43  | 30    |
| H18  | 7610.97  | 10556.02 | 4206.34  | 29    |
| H19  | 7483.62  | 8981.09  | 3651.91  | 21    |
| H21  | 6566.77  | 5197.79  | 6763.17  | 17    |
| H22  | 5426.27  | 5288.76  | 7923.72  | 22    |
| H23  | 4195     | 6465.32  | 7832.79  | 26    |
| H24  | 4134.48  | 7570.62  | 6590.03  | 26    |
| H25  | 5273.92  | 7482.96  | 5423.75  | 20    |
| H2   | 5567(11) | 6942(11) | 3856(10) | 21(4) |
| H3   | 5850(10) | 4907(10) | 4318(10) | 15(3) |
| H4   | 7636(11) | 4241(11) | 3543(10) | 21(4) |
| H5A  | 9216(10) | 5266(10) | 4470(10) | 16(3) |
| H6A  | 9001(10) | 7316(10) | 4010(10) | 17(3) |
| H7A  | 8509(11) | 5872(11) | 2506(10) | 21(4) |
| H8A  | 7230(10) | 7575(11) | 2751(10) | 19(3) |
| H9A  | 6343(10) | 5651(10) | 2413(10) | 19(3) |

## Experimental

Single crystals of C<sub>25</sub>H<sub>33</sub>B<sub>10</sub>NO [mo\_0922\_CG\_0m] were recrystallised from a mixture of chloroform and hexane by slow evaporation. A suitable crystal was selected and the crystal was mounted on a MITIGEN holder oil on a Bruker D8 Venture AgMo Dual Source diffractometer. The crystal was kept at 100.03 K during data collection. Using Olex2<sup>[2]</sup>, the structure was solved with the XT<sup>[3]</sup> structure solution program using Intrinsic Phasing and refined with the XL<sup>[4]</sup> refinement package using Least Squares minimisation.

## Crystal structure determination of 3ab

**Crystal Data** for C<sub>25</sub>H<sub>33</sub>B<sub>10</sub>NO (*M* = 471.62 g/mol): monoclinic, space group P2<sub>1</sub>/n (no. 14), *a* = 13.6114(6) Å, *b* = 13.9152(8) Å, *c* = 14.1817(8) Å,  $\beta$  = 93.358(2)°, *V* = 2681.5(2) Å<sup>3</sup>, *Z* = 4, *T* = 100.0 K,  $\mu$ (MoK $\alpha$ ) = 0.064 mm<sup>-1</sup>, *D*<sub>calc</sub> = 1.168 g/cm<sup>3</sup>, 60954 reflections measured (4.032° ≤ 2 $\Theta$  ≤ 57.426°), 6925 unique (*R*<sub>int</sub> = 0.0319, *R*<sub>sigma</sub> = 0.0183) which were used in all calculations. The final *R*<sub>1</sub> was 0.0425 (*I* > 2 $\sigma$ (*I*)) and *wR*<sub>2</sub> was 0.1132 (all data).

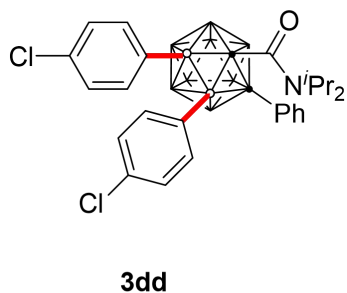

≡

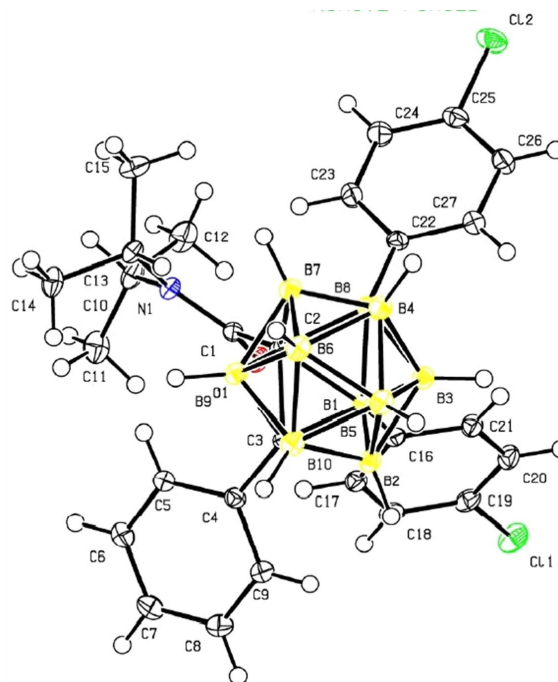

**CCDC 1983612**

### Crystal data and structure refinement for 3dd.

|                                    |                                                                    |
|------------------------------------|--------------------------------------------------------------------|
| Identification code                | mo_0830_CG_0m                                                      |
| CCDC number                        | 1983612                                                            |
| Empirical formula                  | C <sub>27</sub> H <sub>35</sub> B <sub>10</sub> Cl <sub>2</sub> NO |
| Formula weight                     | 568.56                                                             |
| Temperature/K                      | 100.0                                                              |
| Crystal system                     | triclinic                                                          |
| Space group                        | P-1                                                                |
| a/Å                                | 10.8615(14)                                                        |
| b/Å                                | 10.9215(14)                                                        |
| c/Å                                | 13.8510(18)                                                        |
| α/°                                | 105.147(4)                                                         |
| β/°                                | 105.960(4)                                                         |
| γ/°                                | 99.055(4)                                                          |
| Volume/Å <sup>3</sup>              | 1477.6(3)                                                          |
| Z                                  | 2                                                                  |
| ρ <sub>calc</sub> /cm <sup>3</sup> | 1.278                                                              |
| μ/mm <sup>-1</sup>                 | 0.245                                                              |
| F(000)                             | 592.0                                                              |
| Crystal size/mm <sup>3</sup>       | 0.18 × 0.15 × 0.04                                                 |
| Radiation                          | MoKα (λ = 0.71073)                                                 |
| 2θ range for data collection/°     | 4.244 to 59.328                                                    |
| Index ranges                       | -15 ≤ h ≤ 15, -15 ≤ k ≤ 15, -19 ≤ l ≤ 19                           |
| Reflections collected              | 77051                                                              |
| Independent reflections            | 8309 [R <sub>int</sub> = 0.0303, R <sub>sigma</sub> = 0.0150]      |
| Data/restraints/parameters         | 8309/0/398                                                         |
| Goodness-of-fit on F <sup>2</sup>  | 1.049                                                              |

|                                                |                                  |
|------------------------------------------------|----------------------------------|
| Final R indexes [ $I > 2\sigma(I)$ ]           | $R_1 = 0.0310$ , $wR_2 = 0.0792$ |
| Final R indexes [all data]                     | $R_1 = 0.0349$ , $wR_2 = 0.0823$ |
| Largest diff. peak/hole / $e \text{ \AA}^{-3}$ | 0.39/-0.30                       |

**Fractional Atomic Coordinates ( $\times 10^4$ ) and Equivalent Isotropic Displacement Parameters ( $\text{\AA}^2 \times 10^3$ ) for mo\_0830\_CG\_0m.  $U_{eq}$  is defined as 1/3 of of the trace of the orthogonalised  $U_{ij}$  tensor.**

| Atom | x          | y          | z          | U(eq)     |
|------|------------|------------|------------|-----------|
| C11  | 1720.0(2)  | 991.8(2)   | 1399.7(2)  | 25.04(6)  |
| C12  | 9244.9(3)  | 2662.9(3)  | -321.5(2)  | 26.52(6)  |
| O1   | 5234.1(7)  | 6365.7(6)  | 1759.1(5)  | 17.10(13) |
| N1   | 6567.2(8)  | 8214.5(7)  | 1822.7(6)  | 14.08(14) |
| C1   | 6225.8(9)  | 7258.9(8)  | 2229.3(7)  | 12.76(15) |
| C2   | 7073.1(8)  | 7211.4(8)  | 3319.9(7)  | 12.14(15) |
| C3   | 6358.9(9)  | 7393.5(8)  | 4290.8(7)  | 12.93(15) |
| C4   | 5043.5(9)  | 7741.5(9)  | 4110.3(7)  | 14.38(16) |
| C5   | 4679.0(10) | 8541.0(9)  | 3501.4(8)  | 17.75(17) |
| C6   | 3433.8(11) | 8791.8(11) | 3304.4(9)  | 23.1(2)   |
| C7   | 2556.9(11) | 8287.4(11) | 3746.3(10) | 26.5(2)   |
| C8   | 2931.8(11) | 7531.4(11) | 4385.5(10) | 27.6(2)   |
| C9   | 4160.9(10) | 7247.5(10) | 4561.4(8)  | 21.18(19) |
| C10  | 5673.3(10) | 8108.3(9)  | 748.6(7)   | 18.63(18) |
| C11  | 4335.2(11) | 8345.2(11) | 776.9(9)   | 25.1(2)   |
| C12  | 5551.4(13) | 6849.6(11) | -107.6(8)  | 27.9(2)   |
| C13  | 7708.7(9)  | 9374.3(9)  | 2310.6(7)  | 15.77(16) |
| C14  | 7267.6(10) | 10654.7(9) | 2481.8(8)  | 22.22(19) |
| C15  | 8663.3(11) | 9321.8(11) | 1679.6(9)  | 25.3(2)   |
| C16  | 5155.2(9)  | 4614.6(8)  | 2982.8(7)  | 13.32(15) |
| C17  | 3854.1(9)  | 4708.0(9)  | 2556.3(7)  | 15.81(16) |
| C18  | 2794.7(9)  | 3608.9(9)  | 2082.6(7)  | 17.69(17) |
| C19  | 3028.3(9)  | 2382.6(9)  | 2018.3(7)  | 17.81(17) |
| C20  | 4291.2(10) | 2241.1(9)  | 2423.4(8)  | 18.26(17) |
| C21  | 5339.6(9)  | 3353.4(9)  | 2900.6(7)  | 16.01(16) |
| C22  | 8201.7(9)  | 5148.9(9)  | 2378.8(7)  | 15.19(16) |
| C23  | 8058.6(11) | 5448.4(10) | 1439.5(8)  | 21.85(19) |
| C24  | 8368.8(11) | 4694.8(10) | 605.3(8)   | 23.5(2)   |
| C25  | 8843.9(9)  | 3617.9(9)  | 712.6(8)   | 18.98(18) |
| C26  | 9002.2(10) | 3280.5(10) | 1627.4(8)  | 20.72(19) |
| C27  | 8681.6(10) | 4049.7(9)  | 2451.3(8)  | 19.02(18) |
| B1   | 6410.2(10) | 5795.9(9)  | 3633.8(8)  | 12.93(17) |
| B2   | 6810.4(10) | 6415.5(10) | 5044.2(8)  | 15.07(18) |
| B3   | 7850.2(10) | 5582.2(10) | 4503.9(8)  | 15.30(18) |
| B4   | 9265.6(10) | 6756.0(11) | 4647.0(8)  | 17.15(19) |

|     |            |            |           |           |
|-----|------------|------------|-----------|-----------|
| B5  | 8547.1(10) | 6984.7(11) | 5662.4(8) | 17.60(19) |
| B6  | 9090.8(10) | 8340.8(11) | 5269.9(8) | 17.66(19) |
| B7  | 8751.9(10) | 7754.3(10) | 3881.8(8) | 15.11(18) |
| B8  | 7972.6(10) | 6039.8(10) | 3379.5(8) | 14.12(17) |
| B9  | 7692.3(10) | 8600.5(10) | 4414.9(8) | 14.69(18) |
| B10 | 7564.1(11) | 8113.7(10) | 5516.4(8) | 16.60(18) |

**Anisotropic Displacement Parameters ( $\text{\AA}^2 \times 10^3$ ) for mo\_0830\_CG\_0m. The Anisotropic displacement factor exponent takes the form:  $-2\pi^2[h^2a^{*2}U_{11}+2hka^*b^*U_{12}+\dots]$ .**

| Atom | $U_{11}$  | $U_{22}$  | $U_{33}$  | $U_{23}$ | $U_{13}$  | $U_{12}$ |
|------|-----------|-----------|-----------|----------|-----------|----------|
| C11  | 23.18(12) | 18.95(11) | 24.67(12) | 4.06(9)  | 4.58(9)   | -6.81(9) |
| C12  | 29.71(13) | 24.73(12) | 25.23(12) | 0.81(9)  | 14.95(10) | 8.72(10) |
| O1   | 17.5(3)   | 15.0(3)   | 15.2(3)   | 5.1(2)   | 2.5(2)    | -1.0(2)  |
| N1   | 15.9(3)   | 12.9(3)   | 12.8(3)   | 5.2(3)   | 4.1(3)    | 1.3(3)   |
| C1   | 14.2(4)   | 12.8(4)   | 12.0(4)   | 3.9(3)   | 5.1(3)    | 3.8(3)   |
| C2   | 11.9(4)   | 12.2(4)   | 12.6(4)   | 4.1(3)   | 5.0(3)    | 2.2(3)   |
| C3   | 14.0(4)   | 13.2(4)   | 12.4(4)   | 4.3(3)   | 5.8(3)    | 2.9(3)   |
| C4   | 15.0(4)   | 13.5(4)   | 15.0(4)   | 3.3(3)   | 6.6(3)    | 4.0(3)   |
| C5   | 19.7(4)   | 17.6(4)   | 20.7(4)   | 8.2(3)   | 10.6(3)   | 7.3(3)   |
| C6   | 24.0(5)   | 25.0(5)   | 28.4(5)   | 13.4(4)  | 12.6(4)   | 13.2(4)  |
| C7   | 20.1(5)   | 29.6(5)   | 37.8(6)   | 14.8(5)  | 14.5(4)   | 12.7(4)  |
| C8   | 23.3(5)   | 30.9(5)   | 41.9(6)   | 19.7(5)  | 21.0(5)   | 11.3(4)  |
| C9   | 21.3(5)   | 23.0(5)   | 27.6(5)   | 13.7(4)  | 14.0(4)   | 8.6(4)   |
| C10  | 22.8(4)   | 17.0(4)   | 13.6(4)   | 7.0(3)   | 2.5(3)    | 0.9(3)   |
| C11  | 22.1(5)   | 25.2(5)   | 23.4(5)   | 9.7(4)   | -0.7(4)   | 4.9(4)   |
| C12  | 44.1(6)   | 23.8(5)   | 13.5(4)   | 4.9(4)   | 8.5(4)    | 5.5(5)   |
| C13  | 15.9(4)   | 13.4(4)   | 17.3(4)   | 5.9(3)   | 5.3(3)    | 0.1(3)   |
| C14  | 24.3(5)   | 13.4(4)   | 25.8(5)   | 7.0(4)   | 4.6(4)    | 1.6(3)   |
| C15  | 23.6(5)   | 28.4(5)   | 27.0(5)   | 11.2(4)  | 14.0(4)   | 1.5(4)   |
| C16  | 14.5(4)   | 13.4(4)   | 12.4(4)   | 4.1(3)   | 5.9(3)    | 1.9(3)   |
| C17  | 15.6(4)   | 15.1(4)   | 16.8(4)   | 5.5(3)   | 5.9(3)    | 2.7(3)   |
| C18  | 14.9(4)   | 19.4(4)   | 17.4(4)   | 5.7(3)   | 5.1(3)    | 1.1(3)   |
| C19  | 18.4(4)   | 16.0(4)   | 15.8(4)   | 3.3(3)   | 6.2(3)    | -2.7(3)  |
| C20  | 22.1(4)   | 12.7(4)   | 19.3(4)   | 4.8(3)   | 7.4(4)    | 2.1(3)   |
| C21  | 17.0(4)   | 14.6(4)   | 16.9(4)   | 5.6(3)   | 6.1(3)    | 3.3(3)   |
| C22  | 12.9(4)   | 14.7(4)   | 18.6(4)   | 5.0(3)   | 6.7(3)    | 3.1(3)   |
| C23  | 30.2(5)   | 19.7(4)   | 23.2(5)   | 9.8(4)   | 14.2(4)   | 12.6(4)  |
| C24  | 31.8(5)   | 23.4(5)   | 21.4(5)   | 9.0(4)   | 14.1(4)   | 11.3(4)  |
| C25  | 17.4(4)   | 17.5(4)   | 20.3(4)   | 1.1(3)   | 9.0(3)    | 3.1(3)   |
| C26  | 22.1(5)   | 17.6(4)   | 24.3(5)   | 5.8(4)   | 9.5(4)    | 8.5(4)   |
| C27  | 21.0(4)   | 18.3(4)   | 21.0(4)   | 7.8(3)   | 9.0(4)    | 7.6(3)   |
| B1   | 13.6(4)   | 12.4(4)   | 13.8(4)   | 4.9(3)   | 5.3(3)    | 3.4(3)   |
| B2   | 17.1(4)   | 15.5(4)   | 13.3(4)   | 5.9(3)   | 4.8(3)    | 4.1(3)   |
| B3   | 14.4(4)   | 16.3(4)   | 15.9(4)   | 6.9(4)   | 4.5(3)    | 3.8(3)   |

|     |         |         |         |        |        |        |
|-----|---------|---------|---------|--------|--------|--------|
| B4  | 13.5(4) | 18.4(5) | 18.7(5) | 7.2(4) | 3.4(4) | 3.1(4) |
| B5  | 16.6(4) | 18.5(5) | 15.1(4) | 5.9(4) | 1.8(4) | 2.3(4) |
| B6  | 15.6(4) | 17.9(5) | 15.7(4) | 4.9(4) | 1.8(4) | 0.7(4) |
| B7  | 12.4(4) | 14.9(4) | 16.8(4) | 5.3(4) | 4.0(3) | 1.3(3) |
| B8  | 13.4(4) | 13.9(4) | 16.4(4) | 5.9(3) | 5.7(3) | 3.9(3) |
| B9  | 15.0(4) | 13.4(4) | 13.6(4) | 2.9(3) | 4.4(3) | 0.8(3) |
| B10 | 18.6(5) | 16.2(4) | 12.9(4) | 4.0(3) | 3.8(4) | 2.1(4) |

**Bond Lengths for mo\_0830\_CG\_0m.**

| Atom | Atom | Length/Å   | Atom | Atom | Length/Å   |
|------|------|------------|------|------|------------|
| C11  | C19  | 1.7411(10) | C18  | C19  | 1.3869(14) |
| C12  | C25  | 1.7420(10) | C19  | C20  | 1.3816(14) |
| O1   | C1   | 1.2196(11) | C20  | C21  | 1.3930(13) |
| N1   | C1   | 1.3580(11) | C22  | C23  | 1.3969(13) |
| N1   | C10  | 1.4997(12) | C22  | C27  | 1.3980(13) |
| N1   | C13  | 1.4819(11) | C22  | B8   | 1.5783(13) |
| C1   | C2   | 1.5565(12) | C23  | C24  | 1.3893(14) |
| C2   | C3   | 1.7124(12) | C24  | C25  | 1.3827(14) |
| C2   | B1   | 1.8085(13) | C25  | C26  | 1.3838(14) |
| C2   | B7   | 1.7089(13) | C26  | C27  | 1.3924(13) |
| C2   | B8   | 1.7329(13) | B1   | B2   | 1.7924(14) |
| C2   | B9   | 1.7232(13) | B1   | B3   | 1.7828(14) |
| C3   | C4   | 1.5075(12) | B1   | B8   | 1.8194(14) |
| C3   | B1   | 1.7619(13) | B2   | B3   | 1.7595(15) |
| C3   | B2   | 1.7136(13) | B2   | B5   | 1.7727(15) |
| C3   | B9   | 1.7345(13) | B2   | B10  | 1.7697(15) |
| C3   | B10  | 1.7234(14) | B3   | B4   | 1.7678(15) |
| C4   | C5   | 1.3930(13) | B3   | B5   | 1.7823(15) |
| C4   | C9   | 1.3941(13) | B3   | B8   | 1.7867(14) |
| C5   | C6   | 1.3897(13) | B4   | B5   | 1.7693(16) |
| C6   | C7   | 1.3845(15) | B4   | B6   | 1.7859(16) |
| C7   | C8   | 1.3859(16) | B4   | B7   | 1.7589(15) |
| C8   | C9   | 1.3888(14) | B4   | B8   | 1.8019(15) |
| C10  | C11  | 1.5249(15) | B5   | B6   | 1.7775(15) |
| C10  | C12  | 1.5226(14) | B5   | B10  | 1.7684(15) |
| C13  | C14  | 1.5301(13) | B6   | B7   | 1.7707(15) |
| C13  | C15  | 1.5275(13) | B6   | B9   | 1.7642(15) |
| C16  | C17  | 1.4051(12) | B6   | B10  | 1.7759(16) |
| C16  | C21  | 1.4027(12) | B7   | B8   | 1.7898(15) |
| C16  | B1   | 1.5806(13) | B7   | B9   | 1.7802(15) |
| C17  | C18  | 1.3906(13) | B9   | B10  | 1.7740(15) |



**Bond Angles for mo\_0830\_CG\_0m.**

| Atom | Atom | Atom | Angle/°   | Atom | Atom | Atom | Angle/°   |
|------|------|------|-----------|------|------|------|-----------|
| C1   | N1   | C10  | 116.63(7) | B3   | B2   | B5   | 60.61(6)  |
| C1   | N1   | C13  | 128.35(7) | B3   | B2   | B10  | 108.38(7) |
| C13  | N1   | C10  | 115.01(7) | B5   | B2   | B1   | 109.98(7) |
| O1   | C1   | N1   | 122.22(8) | B10  | B2   | B1   | 110.18(7) |
| O1   | C1   | C2   | 115.04(7) | B10  | B2   | B5   | 59.90(6)  |
| N1   | C1   | C2   | 122.73(8) | B1   | B3   | B8   | 61.29(6)  |
| C1   | C2   | C3   | 116.61(7) | B2   | B3   | B1   | 60.79(6)  |
| C1   | C2   | B1   | 112.95(7) | B2   | B3   | B4   | 108.10(7) |
| C1   | C2   | B7   | 126.28(7) | B2   | B3   | B5   | 60.06(6)  |
| C1   | C2   | B8   | 120.35(7) | B2   | B3   | B8   | 109.11(7) |
| C1   | C2   | B9   | 120.86(7) | B4   | B3   | B1   | 110.41(7) |
| C3   | C2   | B1   | 59.98(5)  | B4   | B3   | B5   | 59.78(6)  |
| C3   | C2   | B8   | 109.41(6) | B4   | B3   | B8   | 60.92(6)  |
| C3   | C2   | B9   | 60.64(5)  | B5   | B3   | B1   | 109.98(7) |
| B7   | C2   | C3   | 109.81(7) | B5   | B3   | B8   | 109.16(7) |
| B7   | C2   | B1   | 112.79(6) | B3   | B4   | B5   | 60.52(6)  |
| B7   | C2   | B8   | 62.66(6)  | B3   | B4   | B6   | 108.17(7) |
| B7   | C2   | B9   | 62.49(6)  | B3   | B4   | B8   | 60.06(6)  |
| B8   | C2   | B1   | 61.78(5)  | B5   | B4   | B6   | 60.00(6)  |
| B9   | C2   | B1   | 112.14(6) | B5   | B4   | B8   | 109.06(7) |
| B9   | C2   | B8   | 113.80(7) | B6   | B4   | B8   | 108.68(7) |
| C2   | C3   | B1   | 62.72(5)  | B7   | B4   | B3   | 107.90(7) |
| C2   | C3   | B2   | 110.49(7) | B7   | B4   | B5   | 108.16(7) |
| C2   | C3   | B9   | 59.99(5)  | B7   | B4   | B6   | 59.93(6)  |
| C2   | C3   | B10  | 109.65(7) | B7   | B4   | B8   | 60.33(6)  |
| C4   | C3   | C2   | 120.06(7) | B2   | B5   | B3   | 59.33(6)  |
| C4   | C3   | B1   | 119.01(7) | B2   | B5   | B6   | 107.96(7) |
| C4   | C3   | B2   | 121.95(7) | B4   | B5   | B2   | 107.45(7) |
| C4   | C3   | B9   | 116.46(7) | B4   | B5   | B3   | 59.70(6)  |
| C4   | C3   | B10  | 118.95(7) | B4   | B5   | B6   | 60.46(6)  |
| B2   | C3   | B1   | 62.07(6)  | B6   | B5   | B3   | 107.90(7) |
| B2   | C3   | B9   | 112.28(7) | B10  | B5   | B2   | 59.97(6)  |
| B2   | C3   | B10  | 61.98(6)  | B10  | B5   | B3   | 107.42(7) |
| B9   | C3   | B1   | 113.90(7) | B10  | B5   | B4   | 108.25(7) |
| B10  | C3   | B1   | 113.88(7) | B10  | B5   | B6   | 60.11(6)  |
| B10  | C3   | B9   | 61.73(6)  | B5   | B6   | B4   | 59.54(6)  |
| C5   | C4   | C3   | 121.93(8) | B7   | B6   | B4   | 59.28(6)  |
| C5   | C4   | C9   | 118.83(9) | B7   | B6   | B5   | 107.28(7) |
| C9   | C4   | C3   | 119.24(8) | B7   | B6   | B10  | 108.12(7) |
| C6   | C5   | C4   | 120.65(9) | B9   | B6   | B4   | 107.55(7) |
| C7   | C6   | C5   | 120.18(9) | B9   | B6   | B5   | 107.80(7) |

|     |     |     |            |     |     |     |           |
|-----|-----|-----|------------|-----|-----|-----|-----------|
| C6  | C7  | C8  | 119.44(10) | B9  | B6  | B7  | 60.48(6)  |
| C7  | C8  | C9  | 120.64(10) | B9  | B6  | B10 | 60.15(6)  |
| C8  | C9  | C4  | 120.19(9)  | B10 | B6  | B4  | 107.18(7) |
| N1  | C10 | C11 | 111.92(8)  | B10 | B6  | B5  | 59.69(6)  |
| N1  | C10 | C12 | 113.18(8)  | C2  | B7  | B4  | 106.69(7) |
| C12 | C10 | C11 | 112.73(9)  | C2  | B7  | B6  | 106.48(7) |
| N1  | C13 | C14 | 111.82(8)  | C2  | B7  | B8  | 59.33(5)  |
| N1  | C13 | C15 | 111.55(8)  | C2  | B7  | B9  | 59.15(5)  |
| C15 | C13 | C14 | 112.03(8)  | B4  | B7  | B6  | 60.79(6)  |
| C17 | C16 | B1  | 126.32(8)  | B4  | B7  | B8  | 61.02(6)  |
| C21 | C16 | C17 | 116.75(8)  | B4  | B7  | B9  | 108.03(7) |
| C21 | C16 | B1  | 116.70(8)  | B6  | B7  | B8  | 109.92(7) |
| C18 | C17 | C16 | 121.92(9)  | B6  | B7  | B9  | 59.58(6)  |
| C19 | C18 | C17 | 119.15(9)  | B9  | B7  | B8  | 108.39(7) |
| C18 | C19 | C11 | 119.83(8)  | C2  | B8  | B1  | 61.15(5)  |
| C20 | C19 | C11 | 119.14(7)  | C2  | B8  | B3  | 105.06(7) |
| C20 | C19 | C18 | 121.03(9)  | C2  | B8  | B4  | 103.81(7) |
| C19 | C20 | C21 | 119.04(9)  | C2  | B8  | B7  | 58.01(5)  |
| C20 | C21 | C16 | 122.11(9)  | C22 | B8  | C2  | 123.20(7) |
| C23 | C22 | C27 | 116.99(9)  | C22 | B8  | B1  | 123.35(7) |
| C23 | C22 | B8  | 123.83(8)  | C22 | B8  | B3  | 125.77(8) |
| C27 | C22 | B8  | 118.95(8)  | C22 | B8  | B4  | 122.21(8) |
| C24 | C23 | C22 | 122.21(9)  | C22 | B8  | B7  | 119.46(7) |
| C25 | C24 | C23 | 118.83(9)  | B3  | B8  | B1  | 59.25(5)  |
| C24 | C25 | C12 | 119.60(8)  | B3  | B8  | B4  | 59.02(6)  |
| C24 | C25 | C26 | 121.13(9)  | B3  | B8  | B7  | 105.74(7) |
| C26 | C25 | C12 | 119.28(8)  | B4  | B8  | B1  | 107.25(7) |
| C25 | C26 | C27 | 118.95(9)  | B7  | B8  | B1  | 108.55(7) |
| C26 | C27 | C22 | 121.88(9)  | B7  | B8  | B4  | 58.64(6)  |
| C2  | B1  | B8  | 57.07(5)   | C2  | B9  | C3  | 59.37(5)  |
| C3  | B1  | C2  | 57.30(5)   | C2  | B9  | B6  | 106.15(7) |
| C3  | B1  | B2  | 57.64(5)   | C2  | B9  | B7  | 58.36(5)  |
| C3  | B1  | B3  | 102.80(7)  | C2  | B9  | B10 | 106.83(7) |
| C3  | B1  | B8  | 103.47(6)  | C3  | B9  | B6  | 105.94(7) |
| C16 | B1  | C2  | 130.94(7)  | C3  | B9  | B7  | 105.58(7) |
| C16 | B1  | C3  | 124.76(7)  | C3  | B9  | B10 | 58.83(6)  |
| C16 | B1  | B2  | 118.13(7)  | B6  | B9  | B7  | 59.94(6)  |
| C16 | B1  | B3  | 121.19(7)  | B6  | B9  | B10 | 60.25(6)  |
| C16 | B1  | B8  | 126.36(7)  | B10 | B9  | B7  | 107.79(7) |
| B2  | B1  | C2  | 102.83(6)  | C3  | B10 | B2  | 58.74(5)  |
| B2  | B1  | B8  | 106.24(7)  | C3  | B10 | B5  | 105.75(7) |
| B3  | B1  | C2  | 102.13(6)  | C3  | B10 | B6  | 105.91(7) |
| B3  | B1  | B2  | 58.96(6)   | C3  | B10 | B9  | 59.44(5)  |
| B3  | B1  | B8  | 59.46(6)   | B2  | B10 | B6  | 108.17(7) |
| C3  | B2  | B1  | 60.29(5)   | B2  | B10 | B9  | 107.81(7) |

|    |    |     |           |    |     |    |           |
|----|----|-----|-----------|----|-----|----|-----------|
| C3 | B2 | B3  | 105.80(7) | B5 | B10 | B2 | 60.14(6)  |
| C3 | B2 | B5  | 105.98(7) | B5 | B10 | B6 | 60.20(6)  |
| C3 | B2 | B10 | 59.28(6)  | B5 | B10 | B9 | 107.77(7) |
| B3 | B2 | B1  | 60.25(6)  | B9 | B10 | B6 | 59.60(6)  |

**Torsion Angles for mo\_0830\_CG\_0m.**

| <b>A</b> | <b>B</b> | <b>C</b> | <b>D</b> | <b>Angle/°</b> | <b>A</b> | <b>B</b> | <b>C</b> | <b>D</b> | <b>Angle/°</b> |
|----------|----------|----------|----------|----------------|----------|----------|----------|----------|----------------|
| C11      | C19      | C20      | C21      | 178.83(7)      | B2       | B5       | B10      | B6       | -138.00(7)     |
| C12      | C25      | C26      | C27      | 179.90(8)      | B2       | B5       | B10      | B9       | -100.74(8)     |
| O1       | C1       | C2       | C3       | -65.10(10)     | B3       | B1       | B2       | C3       | 133.43(7)      |
| O1       | C1       | C2       | B1       | 1.60(10)       | B3       | B1       | B2       | B5       | 35.97(7)       |
| O1       | C1       | C2       | B7       | 147.98(8)      | B3       | B1       | B2       | B10      | 100.18(8)      |
| O1       | C1       | C2       | B8       | 71.30(10)      | B3       | B1       | B8       | C2       | -132.29(7)     |
| O1       | C1       | C2       | B9       | -135.25(8)     | B3       | B1       | B8       | C22      | 115.01(9)      |
| N1       | C1       | C2       | C3       | 115.51(9)      | B3       | B1       | B8       | B4       | -35.73(7)      |
| N1       | C1       | C2       | B1       | -177.79(7)     | B3       | B1       | B8       | B7       | -97.66(8)      |
| N1       | C1       | C2       | B7       | -31.41(13)     | B3       | B2       | B5       | B4       | 36.75(7)       |
| N1       | C1       | C2       | B8       | -108.10(9)     | B3       | B2       | B5       | B6       | 100.56(8)      |
| N1       | C1       | C2       | B9       | 45.35(12)      | B3       | B2       | B5       | B10      | 138.14(7)      |
| C1       | N1       | C10      | C11      | 69.00(10)      | B3       | B2       | B10      | C3       | 97.84(7)       |
| C1       | N1       | C10      | C12      | -59.70(11)     | B3       | B2       | B10      | B5       | -37.78(7)      |
| C1       | N1       | C13      | C14      | -117.94(10)    | B3       | B2       | B10      | B6       | -0.11(9)       |
| C1       | N1       | C13      | C15      | 115.72(10)     | B3       | B2       | B10      | B9       | 62.89(9)       |
| C1       | C2       | C3       | C4       | -7.02(11)      | B3       | B4       | B5       | B2       | -36.59(7)      |
| C1       | C2       | C3       | B1       | 102.37(8)      | B3       | B4       | B5       | B6       | -137.75(7)     |
| C1       | C2       | C3       | B2       | 143.32(7)      | B3       | B4       | B5       | B10      | -99.93(8)      |
| C1       | C2       | C3       | B9       | -112.11(8)     | B3       | B4       | B6       | B5       | 38.03(7)       |
| C1       | C2       | C3       | B10      | -150.20(7)     | B3       | B4       | B6       | B7       | -100.59(8)     |
| C1       | C2       | B1       | C3       | -108.49(7)     | B3       | B4       | B6       | B9       | -62.69(9)      |
| C1       | C2       | B1       | C16      | 1.39(12)       | B3       | B4       | B6       | B10      | 0.66(9)        |
| C1       | C2       | B1       | B2       | -145.50(7)     | B3       | B4       | B7       | C2       | 1.17(9)        |
| C1       | C2       | B1       | B3       | 153.97(7)      | B3       | B4       | B7       | B6       | 101.05(8)      |
| C1       | C2       | B1       | B8       | 113.30(8)      | B3       | B4       | B7       | B8       | -38.04(7)      |
| C1       | C2       | B7       | B4       | -149.05(8)     | B3       | B4       | B7       | B9       | 63.43(9)       |
| C1       | C2       | B7       | B6       | 147.22(8)      | B3       | B4       | B8       | C2       | 99.47(7)       |
| C1       | C2       | B7       | B8       | -109.03(9)     | B3       | B4       | B8       | C22      | -115.32(9)     |
| C1       | C2       | B7       | B9       | 109.57(9)      | B3       | B4       | B8       | B1       | 35.83(7)       |
| C1       | C2       | B8       | C22      | 11.47(12)      | B3       | B4       | B8       | B7       | 137.41(7)      |
| C1       | C2       | B8       | B1       | -101.45(8)     | B3       | B5       | B6       | B4       | -37.59(7)      |
| C1       | C2       | B8       | B3       | -142.63(7)     | B3       | B5       | B6       | B7       | -1.06(10)      |
| C1       | C2       | B8       | B4       | 156.24(7)      | B3       | B5       | B6       | B9       | 62.69(9)       |
| C1       | C2       | B8       | B7       | 117.99(8)      | B3       | B5       | B6       | B10      | 100.21(8)      |
| C1       | C2       | B9       | C3       | 105.22(8)      | B3       | B5       | B10      | C3       | -1.42(9)       |

|    |    |     |     |            |    |    |     |     |            |
|----|----|-----|-----|------------|----|----|-----|-----|------------|
| C1 | C2 | B9  | B6  | -155.52(7) | B3 | B5 | B10 | B2  | 36.98(7)   |
| C1 | C2 | B9  | B7  | -117.78(8) | B3 | B5 | B10 | B6  | -101.02(8) |
| C1 | C2 | B9  | B10 | 141.36(8)  | B3 | B5 | B10 | B9  | -63.76(9)  |
| C2 | C3 | C4  | C5  | -33.38(12) | B4 | B3 | B5  | B2  | 138.61(7)  |
| C2 | C3 | C4  | C9  | 146.40(9)  | B4 | B3 | B5  | B6  | 37.93(7)   |
| C2 | C3 | B1  | C16 | -120.15(9) | B4 | B3 | B5  | B10 | 101.35(8)  |
| C2 | C3 | B1  | B2  | 135.98(7)  | B4 | B3 | B8  | C2  | -97.28(7)  |
| C2 | C3 | B1  | B3  | 96.33(7)   | B4 | B3 | B8  | C22 | 109.49(10) |
| C2 | C3 | B1  | B8  | 35.11(6)   | B4 | B3 | B8  | B1  | -139.42(7) |
| C2 | C3 | B2  | B1  | -41.24(6)  | B4 | B3 | B8  | B7  | -36.90(7)  |
| C2 | C3 | B2  | B3  | -0.30(9)   | B4 | B5 | B6  | B7  | 36.53(7)   |
| C2 | C3 | B2  | B5  | 62.98(8)   | B4 | B5 | B6  | B9  | 100.29(8)  |
| C2 | C3 | B2  | B10 | 101.99(7)  | B4 | B5 | B6  | B10 | 137.80(7)  |
| C2 | C3 | B9  | B6  | -99.61(7)  | B4 | B5 | B10 | C3  | 61.62(9)   |
| C2 | C3 | B9  | B7  | -37.07(6)  | B4 | B5 | B10 | B2  | 100.02(8)  |
| C2 | C3 | B9  | B10 | -138.72(7) | B4 | B5 | B10 | B6  | -37.98(7)  |
| C2 | C3 | B10 | B2  | -103.36(7) | B4 | B5 | B10 | B9  | -0.71(10)  |
| C2 | C3 | B10 | B5  | -64.29(8)  | B4 | B6 | B7  | C2  | 100.24(7)  |
| C2 | C3 | B10 | B6  | -1.46(9)   | B4 | B6 | B7  | B8  | 37.54(7)   |
| C2 | C3 | B10 | B9  | 37.34(6)   | B4 | B6 | B7  | B9  | 137.69(7)  |
| C2 | B1 | B2  | C3  | 36.85(6)   | B4 | B6 | B9  | C2  | -0.35(9)   |
| C2 | B1 | B2  | B3  | -96.58(7)  | B4 | B6 | B9  | C3  | 61.69(9)   |
| C2 | B1 | B2  | B5  | -60.61(8)  | B4 | B6 | B9  | B7  | -37.36(7)  |
| C2 | B1 | B2  | B10 | 3.61(9)    | B4 | B6 | B9  | B10 | 100.12(8)  |
| C2 | B1 | B3  | B2  | 97.80(7)   | B4 | B6 | B10 | C3  | -62.02(9)  |
| C2 | B1 | B3  | B4  | -2.08(9)   | B4 | B6 | B10 | B2  | -0.34(9)   |
| C2 | B1 | B3  | B5  | 62.06(8)   | B4 | B6 | B10 | B5  | 37.30(7)   |
| C2 | B1 | B3  | B8  | -39.42(6)  | B4 | B6 | B10 | B9  | -100.74(8) |
| C2 | B1 | B8  | C22 | -112.70(9) | B4 | B7 | B8  | C2  | 135.25(7)  |
| C2 | B1 | B8  | B3  | 132.29(7)  | B4 | B7 | B8  | C22 | -111.88(9) |
| C2 | B1 | B8  | B4  | 96.56(7)   | B4 | B7 | B8  | B1  | 99.31(8)   |
| C2 | B1 | B8  | B7  | 34.64(6)   | B4 | B7 | B8  | B3  | 37.07(7)   |
| C2 | B7 | B8  | C22 | 112.87(9)  | B4 | B7 | B9  | C2  | -99.06(7)  |
| C2 | B7 | B8  | B1  | -35.94(6)  | B4 | B7 | B9  | C3  | -61.52(8)  |
| C2 | B7 | B8  | B3  | -98.18(7)  | B4 | B7 | B9  | B6  | 38.16(7)   |
| C2 | B7 | B8  | B4  | -135.25(7) | B4 | B7 | B9  | B10 | 0.12(9)    |
| C2 | B7 | B9  | C3  | 37.53(6)   | B5 | B2 | B3  | B1  | -140.69(7) |
| C2 | B7 | B9  | B6  | 137.22(7)  | B5 | B2 | B3  | B4  | -36.95(7)  |
| C2 | B7 | B9  | B10 | 99.18(7)   | B5 | B2 | B3  | B8  | -101.61(8) |
| C2 | B9 | B10 | C3  | -36.37(6)  | B5 | B2 | B10 | C3  | 135.62(7)  |
| C2 | B9 | B10 | B2  | -1.72(9)   | B5 | B2 | B10 | B6  | 37.67(7)   |
| C2 | B9 | B10 | B5  | 61.78(9)   | B5 | B2 | B10 | B9  | 100.67(8)  |
| C2 | B9 | B10 | B6  | 99.31(8)   | B5 | B3 | B4  | B6  | -37.80(7)  |
| C3 | C2 | B1  | C16 | 109.88(10) | B5 | B3 | B4  | B7  | -101.17(8) |
| C3 | C2 | B1  | B2  | -37.01(6)  | B5 | B3 | B4  | B8  | -139.33(7) |

|    |    |     |     |             |    |    |     |     |            |
|----|----|-----|-----|-------------|----|----|-----|-----|------------|
| C3 | C2 | B1  | B3  | -97.55(7)   | B5 | B3 | B8  | C2  | -60.69(8)  |
| C3 | C2 | B1  | B8  | -138.21(7)  | B5 | B3 | B8  | C22 | 146.09(9)  |
| C3 | C2 | B7  | B4  | 62.20(8)    | B5 | B3 | B8  | B1  | -102.83(8) |
| C3 | C2 | B7  | B6  | -1.54(9)    | B5 | B3 | B8  | B4  | 36.59(7)   |
| C3 | C2 | B7  | B8  | 102.21(7)   | B5 | B3 | B8  | B7  | -0.30(9)   |
| C3 | C2 | B7  | B9  | -39.18(6)   | B5 | B4 | B6  | B7  | -138.61(7) |
| C3 | C2 | B8  | C22 | 150.64(8)   | B5 | B4 | B6  | B9  | -100.71(8) |
| C3 | C2 | B8  | B1  | 37.72(6)    | B5 | B4 | B6  | B10 | -37.37(7)  |
| C3 | C2 | B8  | B3  | -3.46(8)    | B5 | B4 | B7  | C2  | -62.83(9)  |
| C3 | C2 | B8  | B4  | -64.59(8)   | B5 | B4 | B7  | B6  | 37.05(7)   |
| C3 | C2 | B8  | B7  | -102.84(7)  | B5 | B4 | B7  | B8  | -102.04(8) |
| C3 | C2 | B9  | B6  | 99.26(7)    | B5 | B4 | B7  | B9  | -0.57(9)   |
| C3 | C2 | B9  | B7  | 137.00(7)   | B5 | B4 | B8  | C2  | 62.59(8)   |
| C3 | C2 | B9  | B10 | 36.14(6)    | B5 | B4 | B8  | C22 | -152.20(8) |
| C3 | C4 | C5  | C6  | 176.74(9)   | B5 | B4 | B8  | B1  | -1.05(9)   |
| C3 | C4 | C9  | C8  | -178.54(10) | B5 | B4 | B8  | B3  | -36.88(7)  |
| C3 | B1 | B2  | B3  | -133.43(7)  | B5 | B4 | B8  | B7  | 100.53(8)  |
| C3 | B1 | B2  | B5  | -97.46(8)   | B5 | B6 | B7  | C2  | 63.60(9)   |
| C3 | B1 | B2  | B10 | -33.24(7)   | B5 | B6 | B7  | B4  | -36.64(7)  |
| C3 | B1 | B3  | B2  | 38.99(6)    | B5 | B6 | B7  | B8  | 0.90(10)   |
| C3 | B1 | B3  | B4  | -60.90(8)   | B5 | B6 | B7  | B9  | 101.05(8)  |
| C3 | B1 | B3  | B5  | 3.24(9)     | B5 | B6 | B9  | C2  | -63.16(9)  |
| C3 | B1 | B3  | B8  | -98.24(7)   | B5 | B6 | B9  | C3  | -1.13(9)   |
| C3 | B1 | B8  | C2  | -35.21(6)   | B5 | B6 | B9  | B7  | -100.18(8) |
| C3 | B1 | B8  | C22 | -147.91(8)  | B5 | B6 | B9  | B10 | 37.31(7)   |
| C3 | B1 | B8  | B3  | 97.08(7)    | B5 | B6 | B10 | C3  | -99.32(8)  |
| C3 | B1 | B8  | B4  | 61.35(8)    | B5 | B6 | B10 | B2  | -37.64(7)  |
| C3 | B1 | B8  | B7  | -0.58(8)    | B5 | B6 | B10 | B9  | -138.05(7) |
| C3 | B2 | B3  | B1  | -40.96(6)   | B6 | B4 | B5  | B2  | 101.15(8)  |
| C3 | B2 | B3  | B4  | 62.78(9)    | B6 | B4 | B5  | B3  | 137.75(7)  |
| C3 | B2 | B3  | B5  | 99.73(8)    | B6 | B4 | B5  | B10 | 37.82(7)   |
| C3 | B2 | B3  | B8  | -1.88(9)    | B6 | B4 | B7  | C2  | -99.89(8)  |
| C3 | B2 | B5  | B3  | -99.43(7)   | B6 | B4 | B7  | B8  | -139.09(7) |
| C3 | B2 | B5  | B4  | -62.67(9)   | B6 | B4 | B7  | B9  | -37.62(7)  |
| C3 | B2 | B5  | B6  | 1.14(9)     | B6 | B4 | B8  | C2  | -1.20(9)   |
| C3 | B2 | B5  | B10 | 38.72(7)    | B6 | B4 | B8  | C22 | 144.01(8)  |
| C3 | B2 | B10 | B5  | -135.62(7)  | B6 | B4 | B8  | B1  | -64.84(9)  |
| C3 | B2 | B10 | B6  | -97.95(7)   | B6 | B4 | B8  | B3  | -100.67(8) |
| C3 | B2 | B10 | B9  | -34.95(7)   | B6 | B4 | B8  | B7  | 36.74(7)   |
| C3 | B9 | B10 | B2  | 34.66(7)    | B6 | B5 | B10 | C3  | 99.60(7)   |
| C3 | B9 | B10 | B5  | 98.15(8)    | B6 | B5 | B10 | B2  | 138.00(7)  |
| C3 | B9 | B10 | B6  | 135.68(7)   | B6 | B5 | B10 | B9  | 37.26(7)   |
| C4 | C3 | B1  | C2  | 111.01(8)   | B6 | B7 | B8  | C2  | 97.81(8)   |
| C4 | C3 | B1  | C16 | -9.14(12)   | B6 | B7 | B8  | C22 | -149.32(8) |
| C4 | C3 | B1  | B2  | -113.01(8)  | B6 | B7 | B8  | B1  | 61.87(9)   |

|     |     |     |     |            |    |    |     |     |            |
|-----|-----|-----|-----|------------|----|----|-----|-----|------------|
| C4  | C3  | B1  | B3  | -152.66(7) | B6 | B7 | B8  | B3  | -0.37(9)   |
| C4  | C3  | B1  | B8  | 146.11(7)  | B6 | B7 | B8  | B4  | -37.44(7)  |
| C4  | C3  | B2  | B1  | 108.44(9)  | B6 | B7 | B9  | C2  | -137.22(7) |
| C4  | C3  | B2  | B3  | 149.38(8)  | B6 | B7 | B9  | C3  | -99.68(7)  |
| C4  | C3  | B2  | B5  | -147.33(8) | B6 | B7 | B9  | B10 | -38.04(7)  |
| C4  | C3  | B2  | B10 | -108.32(9) | B6 | B9 | B10 | C3  | -135.68(7) |
| C4  | C3  | B9  | C2  | -111.02(8) | B6 | B9 | B10 | B2  | -101.02(8) |
| C4  | C3  | B9  | B6  | 149.37(7)  | B6 | B9 | B10 | B5  | -37.53(7)  |
| C4  | C3  | B9  | B7  | -148.09(7) | B7 | C2 | C3  | C4  | 145.10(8)  |
| C4  | C3  | B9  | B10 | 110.26(8)  | B7 | C2 | C3  | B1  | -105.51(7) |
| C4  | C3  | B10 | B2  | 113.00(9)  | B7 | C2 | C3  | B2  | -64.56(8)  |
| C4  | C3  | B10 | B5  | 152.06(8)  | B7 | C2 | C3  | B9  | 40.01(7)   |
| C4  | C3  | B10 | B6  | -145.10(8) | B7 | C2 | C3  | B10 | 1.92(9)    |
| C4  | C3  | B10 | B9  | -106.31(8) | B7 | C2 | B1  | C3  | 100.47(7)  |
| C4  | C5  | C6  | C7  | 2.45(16)   | B7 | C2 | B1  | C16 | -149.65(9) |
| C5  | C4  | C9  | C8  | 1.25(15)   | B7 | C2 | B1  | B2  | 63.46(8)   |
| C5  | C6  | C7  | C8  | -0.02(17)  | B7 | C2 | B1  | B3  | 2.92(9)    |
| C6  | C7  | C8  | C9  | -1.78(18)  | B7 | C2 | B1  | B8  | -37.74(7)  |
| C7  | C8  | C9  | C4  | 1.15(18)   | B7 | C2 | B8  | C22 | -106.52(9) |
| C9  | C4  | C5  | C6  | -3.04(15)  | B7 | C2 | B8  | B1  | 140.56(7)  |
| C10 | N1  | C1  | O1  | -1.08(13)  | B7 | C2 | B8  | B3  | 99.39(7)   |
| C10 | N1  | C1  | C2  | 178.27(8)  | B7 | C2 | B8  | B4  | 38.25(6)   |
| C10 | N1  | C13 | C14 | 61.08(10)  | B7 | C2 | B9  | C3  | -137.00(7) |
| C10 | N1  | C13 | C15 | -65.26(10) | B7 | C2 | B9  | B6  | -37.74(7)  |
| C13 | N1  | C1  | O1  | 177.92(8)  | B7 | C2 | B9  | B10 | -100.86(8) |
| C13 | N1  | C1  | C2  | -2.73(14)  | B7 | B4 | B5  | B2  | 64.13(9)   |
| C13 | N1  | C10 | C11 | -110.14(9) | B7 | B4 | B5  | B3  | 100.72(8)  |
| C13 | N1  | C10 | C12 | 121.16(9)  | B7 | B4 | B5  | B6  | -37.03(7)  |
| C16 | C17 | C18 | C19 | -0.69(14)  | B7 | B4 | B5  | B10 | 0.79(10)   |
| C16 | B1  | B2  | C3  | -115.25(8) | B7 | B4 | B6  | B5  | 138.61(7)  |
| C16 | B1  | B2  | B3  | 111.32(9)  | B7 | B4 | B6  | B9  | 37.90(7)   |
| C16 | B1  | B2  | B5  | 147.29(8)  | B7 | B4 | B6  | B10 | 101.24(8)  |
| C16 | B1  | B2  | B10 | -148.49(8) | B7 | B4 | B8  | C2  | -37.94(6)  |
| C16 | B1  | B3  | B2  | -106.20(9) | B7 | B4 | B8  | C22 | 107.27(9)  |
| C16 | B1  | B3  | B4  | 153.92(8)  | B7 | B4 | B8  | B1  | -101.59(7) |
| C16 | B1  | B3  | B5  | -141.94(8) | B7 | B4 | B8  | B3  | -137.41(7) |
| C16 | B1  | B3  | B8  | 116.58(9)  | B7 | B6 | B9  | C2  | 37.02(6)   |
| C16 | B1  | B8  | C2  | 119.51(9)  | B7 | B6 | B9  | C3  | 99.05(7)   |
| C16 | B1  | B8  | C22 | 6.81(13)   | B7 | B6 | B9  | B10 | 137.49(7)  |
| C16 | B1  | B8  | B3  | -108.20(9) | B7 | B6 | B10 | C3  | 0.50(9)    |
| C16 | B1  | B8  | B4  | -143.93(8) | B7 | B6 | B10 | B2  | 62.18(9)   |
| C16 | B1  | B8  | B7  | 154.14(8)  | B7 | B6 | B10 | B5  | 99.83(8)   |
| C17 | C16 | C21 | C20 | -0.15(13)  | B7 | B6 | B10 | B9  | -38.22(7)  |
| C17 | C16 | B1  | C2  | -53.79(13) | B7 | B9 | B10 | C3  | -97.79(7)  |
| C17 | C16 | B1  | C3  | 20.63(13)  | B7 | B9 | B10 | B2  | -63.13(9)  |

|     |     |     |     |             |    |     |     |     |             |
|-----|-----|-----|-----|-------------|----|-----|-----|-----|-------------|
| C17 | C16 | B1  | B2  | 89.06(11)   | B7 | B9  | B10 | B5  | 0.36(9)     |
| C17 | C16 | B1  | B3  | 157.97(8)   | B7 | B9  | B10 | B6  | 37.89(7)    |
| C17 | C16 | B1  | B8  | -129.00(10) | B8 | C2  | C3  | C4  | -147.90(8)  |
| C17 | C18 | C19 | C11 | -178.46(7)  | B8 | C2  | C3  | B1  | -38.50(6)   |
| C17 | C18 | C19 | C20 | 0.48(14)    | B8 | C2  | C3  | B2  | 2.45(9)     |
| C18 | C19 | C20 | C21 | -0.11(14)   | B8 | C2  | C3  | B9  | 107.02(7)   |
| C19 | C20 | C21 | C16 | -0.05(14)   | B8 | C2  | C3  | B10 | 68.92(8)    |
| C21 | C16 | C17 | C18 | 0.52(13)    | B8 | C2  | B1  | C3  | 138.21(7)   |
| C21 | C16 | B1  | C2  | 132.00(9)   | B8 | C2  | B1  | C16 | -111.91(10) |
| C21 | C16 | B1  | C3  | -153.58(8)  | B8 | C2  | B1  | B2  | 101.20(7)   |
| C21 | C16 | B1  | B2  | -85.16(10)  | B8 | C2  | B1  | B3  | 40.67(6)    |
| C21 | C16 | B1  | B3  | -16.24(12)  | B8 | C2  | B7  | B4  | -40.01(7)   |
| C21 | C16 | B1  | B8  | 56.78(12)   | B8 | C2  | B7  | B6  | -103.74(7)  |
| C22 | C23 | C24 | C25 | -0.47(17)   | B8 | C2  | B7  | B9  | -141.39(7)  |
| C23 | C22 | C27 | C26 | -0.15(14)   | B8 | C2  | B9  | C3  | -99.71(7)   |
| C23 | C22 | B8  | C2  | 19.47(14)   | B8 | C2  | B9  | B6  | -0.45(9)    |
| C23 | C22 | B8  | B1  | 94.42(11)   | B8 | C2  | B9  | B7  | 37.29(7)    |
| C23 | C22 | B8  | B3  | 168.14(9)   | B8 | C2  | B9  | B10 | -63.58(9)   |
| C23 | C22 | B8  | B4  | -119.07(10) | B8 | C22 | C23 | C24 | 174.82(10)  |
| C23 | C22 | B8  | B7  | -49.59(13)  | B8 | C22 | C27 | C26 | -174.95(9)  |
| C23 | C24 | C25 | C12 | -179.76(8)  | B8 | B1  | B2  | C3  | 95.89(7)    |
| C23 | C24 | C25 | C26 | 0.50(16)    | B8 | B1  | B2  | B3  | -37.54(6)   |
| C24 | C25 | C26 | C27 | -0.36(15)   | B8 | B1  | B2  | B5  | -1.57(9)    |
| C25 | C26 | C27 | C22 | 0.19(15)    | B8 | B1  | B2  | B10 | 62.65(9)    |
| C27 | C22 | C23 | C24 | 0.30(15)    | B8 | B1  | B3  | B2  | 137.22(7)   |
| C27 | C22 | B8  | C2  | -166.11(8)  | B8 | B1  | B3  | B4  | 37.34(7)    |
| C27 | C22 | B8  | B1  | -91.16(11)  | B8 | B1  | B3  | B5  | 101.48(8)   |
| C27 | C22 | B8  | B3  | -17.43(13)  | B8 | B3  | B4  | B5  | 139.33(7)   |
| C27 | C22 | B8  | B4  | 55.36(12)   | B8 | B3  | B4  | B6  | 101.54(8)   |
| C27 | C22 | B8  | B7  | 124.84(9)   | B8 | B3  | B4  | B7  | 38.17(7)    |
| B1  | C2  | C3  | C4  | -109.39(8)  | B8 | B3  | B5  | B2  | 101.53(8)   |
| B1  | C2  | C3  | B2  | 40.95(6)    | B8 | B3  | B5  | B4  | -37.08(7)   |
| B1  | C2  | C3  | B9  | 145.52(7)   | B8 | B3  | B5  | B6  | 0.86(10)    |
| B1  | C2  | C3  | B10 | 107.43(7)   | B8 | B3  | B5  | B10 | 64.27(9)    |
| B1  | C2  | B7  | B4  | -2.62(9)    | B8 | B4  | B5  | B2  | 0.09(10)    |
| B1  | C2  | B7  | B6  | -66.36(8)   | B8 | B4  | B5  | B3  | 36.69(7)    |
| B1  | C2  | B7  | B8  | 37.39(7)    | B8 | B4  | B5  | B6  | -101.06(8)  |
| B1  | C2  | B7  | B9  | -104.01(7)  | B8 | B4  | B5  | B10 | -63.24(9)   |
| B1  | C2  | B8  | C22 | 112.93(9)   | B8 | B4  | B6  | B5  | 101.70(8)   |
| B1  | C2  | B8  | B3  | -41.17(6)   | B8 | B4  | B6  | B7  | -36.92(7)   |
| B1  | C2  | B8  | B4  | -102.31(7)  | B8 | B4  | B6  | B9  | 0.98(10)    |
| B1  | C2  | B8  | B7  | -140.56(7)  | B8 | B4  | B6  | B10 | 64.33(9)    |
| B1  | C2  | B9  | C3  | -31.95(6)   | B8 | B4  | B7  | C2  | 39.21(6)    |
| B1  | C2  | B9  | B6  | 67.31(8)    | B8 | B4  | B7  | B6  | 139.09(7)   |
| B1  | C2  | B9  | B7  | 105.05(7)   | B8 | B4  | B7  | B9  | 101.47(7)   |

|    |     |     |     |             |    |    |     |     |            |
|----|-----|-----|-----|-------------|----|----|-----|-----|------------|
| B1 | C2  | B9  | B10 | 4.19(9)     | B8 | B7 | B9  | C2  | -34.44(6)  |
| B1 | C3  | C4  | C5  | -106.85(10) | B8 | B7 | B9  | C3  | 3.09(9)    |
| B1 | C3  | C4  | C9  | 72.93(11)   | B8 | B7 | B9  | B6  | 102.78(8)  |
| B1 | C3  | B2  | B3  | 40.94(6)    | B8 | B7 | B9  | B10 | 64.74(9)   |
| B1 | C3  | B2  | B5  | 104.23(7)   | B9 | C2 | C3  | C4  | 105.09(8)  |
| B1 | C3  | B2  | B10 | 143.23(7)   | B9 | C2 | C3  | B1  | -145.52(7) |
| B1 | C3  | B9  | C2  | 33.39(7)    | B9 | C2 | C3  | B2  | -104.57(7) |
| B1 | C3  | B9  | B6  | -66.22(9)   | B9 | C2 | C3  | B10 | -38.09(7)  |
| B1 | C3  | B9  | B7  | -3.68(9)    | B9 | C2 | B1  | C3  | 32.19(6)   |
| B1 | C3  | B9  | B10 | -105.33(8)  | B9 | C2 | B1  | C16 | 142.06(9)  |
| B1 | C3  | B10 | B2  | -35.33(7)   | B9 | C2 | B1  | B2  | -4.83(9)   |
| B1 | C3  | B10 | B5  | 3.73(9)     | B9 | C2 | B1  | B3  | -65.36(8)  |
| B1 | C3  | B10 | B6  | 66.57(9)    | B9 | C2 | B1  | B8  | -106.03(7) |
| B1 | C3  | B10 | B9  | 105.36(7)   | B9 | C2 | B7  | B4  | 101.38(8)  |
| B1 | C16 | C17 | C18 | -173.69(8)  | B9 | C2 | B7  | B6  | 37.65(7)   |
| B1 | C16 | C21 | C20 | 174.63(8)   | B9 | C2 | B7  | B8  | 141.39(7)  |
| B1 | B2  | B3  | B4  | 103.74(8)   | B9 | C2 | B8  | C22 | -143.73(8) |
| B1 | B2  | B3  | B5  | 140.69(7)   | B9 | C2 | B8  | B1  | 103.34(7)  |
| B1 | B2  | B3  | B8  | 39.08(7)    | B9 | C2 | B8  | B3  | 62.17(8)   |
| B1 | B2  | B5  | B3  | -35.82(7)   | B9 | C2 | B8  | B4  | 1.03(9)    |
| B1 | B2  | B5  | B4  | 0.94(10)    | B9 | C2 | B8  | B7  | -37.22(7)  |
| B1 | B2  | B5  | B6  | 64.75(9)    | B9 | C3 | C4  | C5  | 35.67(12)  |
| B1 | B2  | B5  | B10 | 102.32(8)   | B9 | C3 | C4  | C9  | -144.55(9) |
| B1 | B2  | B10 | C3  | 33.63(7)    | B9 | C3 | B1  | C2  | -32.42(6)  |
| B1 | B2  | B10 | B5  | -101.99(8)  | B9 | C3 | B1  | C16 | -152.57(8) |
| B1 | B2  | B10 | B6  | -64.32(9)   | B9 | C3 | B1  | B2  | 103.56(8)  |
| B1 | B2  | B10 | B9  | -1.32(10)   | B9 | C3 | B1  | B3  | 63.91(8)   |
| B1 | B3  | B4  | B5  | 101.84(8)   | B9 | C3 | B1  | B8  | 2.68(9)    |
| B1 | B3  | B4  | B6  | 64.04(9)    | B9 | C3 | B2  | B1  | -106.16(7) |
| B1 | B3  | B4  | B7  | 0.67(10)    | B9 | C3 | B2  | B3  | -65.22(9)  |
| B1 | B3  | B4  | B8  | -37.49(7)   | B9 | C3 | B2  | B5  | -1.93(9)   |
| B1 | B3  | B5  | B2  | 36.04(7)    | B9 | C3 | B2  | B10 | 37.07(7)   |
| B1 | B3  | B5  | B4  | -102.57(8)  | B9 | C3 | B10 | B2  | -140.70(7) |
| B1 | B3  | B5  | B6  | -64.64(9)   | B9 | C3 | B10 | B5  | -101.63(8) |
| B1 | B3  | B5  | B10 | -1.22(10)   | B9 | C3 | B10 | B6  | -38.80(7)  |
| B1 | B3  | B8  | C2  | 42.14(6)    | B9 | B6 | B7  | C2  | -37.45(6)  |
| B1 | B3  | B8  | C22 | -111.08(10) | B9 | B6 | B7  | B4  | -137.69(7) |
| B1 | B3  | B8  | B4  | 139.42(7)   | B9 | B6 | B7  | B8  | -100.16(8) |
| B1 | B3  | B8  | B7  | 102.53(7)   | B9 | B6 | B10 | C3  | 38.72(7)   |
| B2 | C3  | C4  | C5  | 179.73(8)   | B9 | B6 | B10 | B2  | 100.41(8)  |
| B2 | C3  | C4  | C9  | -0.49(13)   | B9 | B6 | B10 | B5  | 138.05(7)  |
| B2 | C3  | B1  | C2  | -135.98(7)  | B9 | B7 | B8  | C2  | 34.37(6)   |
| B2 | C3  | B1  | C16 | 103.87(9)   | B9 | B7 | B8  | C22 | 147.24(8)  |
| B2 | C3  | B1  | B3  | -39.65(6)   | B9 | B7 | B8  | B1  | -1.57(9)   |
| B2 | C3  | B1  | B8  | -100.88(7)  | B9 | B7 | B8  | B3  | -63.81(8)  |



|    |    |     |     |            |     |    |    |     |            |
|----|----|-----|-----|------------|-----|----|----|-----|------------|
| B2 | C3 | B9  | C2  | 101.55(7)  | B9  | B7 | B8 | B4  | -100.88(8) |
| B2 | C3 | B9  | B6  | 1.94(9)    | B10 | C3 | C4 | C5  | 106.45(10) |
| B2 | C3 | B9  | B7  | 64.48(8)   | B10 | C3 | C4 | C9  | -73.77(11) |
| B2 | C3 | B9  | B10 | -37.18(7)  | B10 | C3 | B1 | C2  | -100.69(7) |
| B2 | C3 | B10 | B5  | 39.06(7)   | B10 | C3 | B1 | C16 | 139.17(8)  |
| B2 | C3 | B10 | B6  | 101.90(8)  | B10 | C3 | B1 | B2  | 35.30(7)   |
| B2 | C3 | B10 | B9  | 140.70(7)  | B10 | C3 | B1 | B3  | -4.36(9)   |
| B2 | B1 | B3  | B4  | -99.89(8)  | B10 | C3 | B1 | B8  | -65.58(8)  |
| B2 | B1 | B3  | B5  | -35.74(7)  | B10 | C3 | B2 | B1  | -143.23(7) |
| B2 | B1 | B3  | B8  | -137.22(7) | B10 | C3 | B2 | B3  | -102.29(8) |
| B2 | B1 | B8  | C2  | -94.98(7)  | B10 | C3 | B2 | B5  | -39.01(7)  |
| B2 | B1 | B8  | C22 | 152.32(8)  | B10 | C3 | B9 | C2  | 138.72(7)  |
| B2 | B1 | B8  | B3  | 37.31(6)   | B10 | C3 | B9 | B6  | 39.11(7)   |
| B2 | B1 | B8  | B4  | 1.58(9)    | B10 | C3 | B9 | B7  | 101.65(8)  |
| B2 | B1 | B8  | B7  | -60.35(8)  | B10 | B2 | B3 | B1  | -103.22(7) |
| B2 | B3 | B4  | B5  | 37.07(7)   | B10 | B2 | B3 | B4  | 0.52(9)    |
| B2 | B3 | B4  | B6  | -0.73(9)   | B10 | B2 | B3 | B5  | 37.47(7)   |
| B2 | B3 | B4  | B7  | -64.10(9)  | B10 | B2 | B3 | B8  | -64.14(9)  |
| B2 | B3 | B4  | B8  | -102.27(7) | B10 | B2 | B5 | B3  | -138.14(7) |
| B2 | B3 | B5  | B4  | -138.61(7) | B10 | B2 | B5 | B4  | -101.39(8) |
| B2 | B3 | B5  | B6  | -100.68(8) | B10 | B2 | B5 | B6  | -37.58(7)  |
| B2 | B3 | B5  | B10 | -37.26(7)  | B10 | B5 | B6 | B4  | -137.80(7) |
| B2 | B3 | B8  | C2  | 3.28(9)    | B10 | B5 | B6 | B7  | -101.27(8) |
| B2 | B3 | B8  | C22 | -149.94(8) | B10 | B5 | B6 | B9  | -37.51(7)  |
| B2 | B3 | B8  | B1  | -38.86(7)  | B10 | B6 | B7 | C2  | 0.62(9)    |
| B2 | B3 | B8  | B4  | 100.57(8)  | B10 | B6 | B7 | B4  | -99.62(8)  |
| B2 | B3 | B8  | B7  | 63.67(9)   | B10 | B6 | B7 | B8  | -62.08(9)  |
| B2 | B5 | B6  | B4  | -100.29(8) | B10 | B6 | B7 | B9  | 38.07(7)   |
| B2 | B5 | B6  | B7  | -63.76(9)  | B10 | B6 | B9 | C2  | -100.47(7) |
| B2 | B5 | B6  | B9  | 0.00(10)   | B10 | B6 | B9 | C3  | -38.44(6)  |
| B2 | B5 | B6  | B10 | 37.52(7)   | B10 | B6 | B9 | B7  | -137.49(7) |
| B2 | B5 | B10 | C3  | -38.40(6)  |     |    |    |     |            |

**Hydrogen Atom Coordinates ( $\text{\AA}\times 10^4$ ) and Isotropic Displacement Parameters ( $\text{\AA}^2\times 10^3$ ) for mo\_0830\_CG\_0m.**

| Atom | x       | y       | z       | U(eq) |
|------|---------|---------|---------|-------|
| H5   | 5287.57 | 8918.58 | 3218.02 | 21    |
| H6   | 3183.63 | 9310.61 | 2865.33 | 28    |
| H7   | 1705.43 | 8458.16 | 3612.59 | 32    |
| H8   | 2342.28 | 7204.36 | 4706.33 | 33    |
| H9   | 4400.9  | 6714.95 | 4990.45 | 25    |
| H10  | 6102.19 | 8838.75 | 548.45  | 22    |
| H11A | 3871.61 | 7653.76 | 973.06  | 38    |
| H11B | 3807.17 | 8336.97 | 75.38   | 38    |

|      |           |          |          |    |
|------|-----------|----------|----------|----|
| H11C | 4466.69   | 9197.11  | 1300.3   | 38 |
| H12A | 6435.02   | 6752.77  | -101.61  | 42 |
| H12B | 5051      | 6884.71  | -802.08  | 42 |
| H12C | 5089.68   | 6101.17  | 29.63    | 42 |
| H13  | 8201.11   | 9346.59  | 3026.75  | 19 |
| H14A | 6801.31   | 10729.97 | 1793.67  | 33 |
| H14B | 8043.7    | 11395.57 | 2858.49  | 33 |
| H14C | 6675.17   | 10658.49 | 2903.04  | 33 |
| H15A | 8925.5    | 8491.73  | 1591.29  | 38 |
| H15B | 9448.97   | 10051.52 | 2061.21  | 38 |
| H15C | 8228.05   | 9388.55  | 981.32   | 38 |
| H17  | 3693.41   | 5546.41  | 2592.59  | 19 |
| H18  | 1922.01   | 3697.06  | 1806.54  | 21 |
| H20  | 4442.33   | 1397.46  | 2377.14  | 22 |
| H21  | 6207.27   | 3254.7   | 3179.31  | 19 |
| H23  | 7738.49   | 6192.32  | 1368.62  | 26 |
| H24  | 8256.48   | 4915.57  | -27.68   | 28 |
| H26  | 9324.5    | 2535.9   | 1692.28  | 25 |
| H27  | 8792.27   | 3820.9   | 3080.69  | 23 |
| H2   | 6109(13)  | 6011(12) | 5362(10) | 18 |
| H3   | 7914(13)  | 4606(12) | 4534(10) | 18 |
| H4   | 10219(13) | 6521(13) | 4738(10) | 21 |
| H5A  | 8999(13)  | 6894(13) | 6445(10) | 21 |
| H6A  | 9923(13)  | 9159(13) | 5770(10) | 21 |
| H7A  | 9286(13)  | 8151(12) | 3458(10) | 18 |
| H9A  | 7468(13)  | 9498(12) | 4323(10) | 18 |
| H10A | 7293(13)  | 8787(13) | 6115(10) | 20 |

## Experimental

Single crystals of  $C_{27}H_{35}B_{10}Cl_2NO$  [mo\_0830\_CG\_0m] were recrystallised from a mixture of chloroform and hexane by slow evaporation. A suitable crystal was selected and the crystal was mounted on a MITIGEN holder oil on a Bruker D8 Venture MoCu Dual Source diffractometer. The crystal was kept at 100.03 K during data collection. Using Olex2<sup>[2]</sup>, the structure was solved with the XT<sup>[3]</sup> structure solution program using Intrinsic Phasing and refined with the XL<sup>[4]</sup> refinement package using Least Squares minimisation.

## Crystal structure determination of 3dd

**Crystal Data** for  $C_{27}H_{35}B_{10}Cl_2NO$  ( $M = 568.56$  g/mol): triclinic, space group P-1 (no. 2),  $a = 10.8615(14)$  Å,  $b = 10.9215(14)$  Å,  $c = 13.8510(18)$  Å,  $\alpha = 105.147(4)^\circ$ ,  $\beta = 105.960(4)^\circ$ ,  $\gamma = 99.055(4)^\circ$ ,  $V = 1477.6(3)$  Å<sup>3</sup>,  $Z = 2$ ,  $T = 100.0$  K,  $\mu(\text{MoK}\alpha) = 0.245$  mm<sup>-1</sup>,  $D_{\text{calc}} = 1.278$  g/cm<sup>3</sup>, 77051 reflections measured ( $4.244^\circ \leq 2\theta \leq 59.328^\circ$ ), 8309 unique ( $R_{\text{int}} = 0.0303$ ,

$R_{\text{sigma}} = 0.0150$ ) which were used in all calculations. The final  $R_1$  was 0.0310 ( $I > 2\sigma(I)$ ) and  $wR_2$  was 0.0823 (all data).

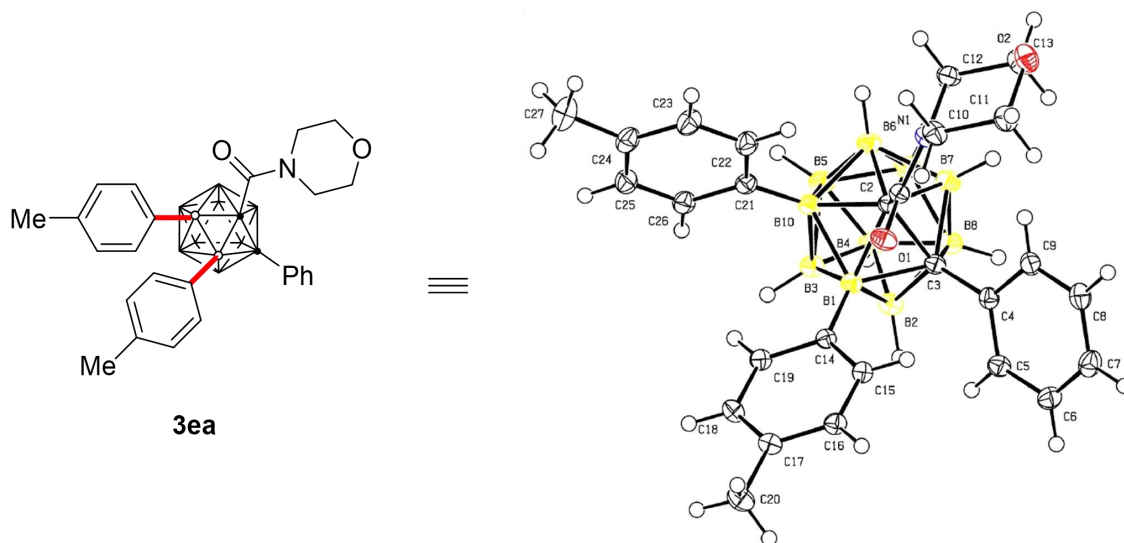

CCDC 1983607

### Crystal data and structure refinement for 3ea.

|                                               |                                                               |
|-----------------------------------------------|---------------------------------------------------------------|
| Identification code                           | mo_0804_CG_0m                                                 |
| CCDC number                                   | 1983607                                                       |
| Empirical formula                             | $C_{27}H_{35}B_{10}NO_2$                                      |
| Formula weight                                | 513.66                                                        |
| Temperature/K                                 | 100.0                                                         |
| Crystal system                                | triclinic                                                     |
| Space group                                   | P-1                                                           |
| $a/\text{\AA}$                                | 11.7623(18)                                                   |
| $b/\text{\AA}$                                | 11.821(2)                                                     |
| $c/\text{\AA}$                                | 12.371(2)                                                     |
| $\alpha/^\circ$                               | 108.419(5)                                                    |
| $\beta/^\circ$                                | 100.884(5)                                                    |
| $\gamma/^\circ$                               | 113.869(6)                                                    |
| Volume/ $\text{\AA}^3$                        | 1389.5(4)                                                     |
| Z                                             | 2                                                             |
| $\rho_{\text{calc}}/\text{cm}^3$              | 1.228                                                         |
| $\mu/\text{mm}^{-1}$                          | 0.070                                                         |
| F(000)                                        | 540.0                                                         |
| Crystal size/ $\text{mm}^3$                   | $0.215 \times 0.134 \times 0.074$                             |
| Radiation                                     | MoK $\alpha$ ( $\lambda = 0.71073$ )                          |
| $2\theta$ range for data collection/ $^\circ$ | 4.068 to 57.416                                               |
| Index ranges                                  | $-15 \leq h \leq 15, -15 \leq k \leq 15, -16 \leq l \leq 16$  |
| Reflections collected                         | 29979                                                         |
| Independent reflections                       | 7064 [ $R_{\text{int}} = 0.0456, R_{\text{sigma}} = 0.0388$ ] |
| Data/restraints/parameters                    | 7064/0/388                                                    |
| Goodness-of-fit on $F^2$                      | 1.073                                                         |

|                                                |                                  |
|------------------------------------------------|----------------------------------|
| Final R indexes [ $I \geq 2\sigma(I)$ ]        | $R_1 = 0.0538$ , $wR_2 = 0.1248$ |
| Final R indexes [all data]                     | $R_1 = 0.0744$ , $wR_2 = 0.1431$ |
| Largest diff. peak/hole / $e \text{ \AA}^{-3}$ | 0.95/-0.36                       |

**Fractional Atomic Coordinates ( $\times 10^4$ ) and Equivalent Isotropic Displacement Parameters ( $\text{\AA}^2 \times 10^3$ ) for mo\_0804\_CG\_0m.  $U_{eq}$  is defined as 1/3 of of the trace of the orthogonalised  $U_{ij}$  tensor.**

| Atom | x           | y           | z          | U(eq)   |
|------|-------------|-------------|------------|---------|
| O1   | 3473.3(12)  | 8449.0(12)  | 4205.3(10) | 22.9(3) |
| O2   | 4263.2(13)  | 8504.8(13)  | 8148.6(11) | 28.7(3) |
| N1   | 4162.0(13)  | 7923.9(14)  | 5706.9(12) | 19.1(3) |
| C1   | 3603.6(15)  | 7616.0(16)  | 4517.9(14) | 17.5(3) |
| C2   | 3075.7(15)  | 6180.9(15)  | 3480.2(14) | 17.1(3) |
| C3   | 1387.5(15)  | 5238.9(15)  | 2701.8(14) | 17.9(3) |
| C4   | 488.1(15)   | 5740.7(15)  | 3127.6(14) | 17.8(3) |
| C5   | -607.9(16)  | 5545.8(16)  | 2257.6(15) | 20.8(3) |
| C6   | -1469.4(17) | 5971.4(18)  | 2626.1(16) | 24.8(3) |
| C7   | -1249.6(18) | 6600.9(18)  | 3857.5(17) | 26.1(4) |
| C8   | -167.7(17)  | 6789.9(18)  | 4721.8(16) | 25.0(3) |
| C9   | 689.6(16)   | 6353.3(16)  | 4361.6(15) | 21.2(3) |
| C10  | 4619.7(17)  | 9329.2(17)  | 6614.7(14) | 23.2(3) |
| C11  | 3963.3(18)  | 9254.6(18)  | 7544.8(16) | 26.0(4) |
| C12  | 4428.5(17)  | 7124.9(18)  | 6315.8(15) | 22.8(3) |
| C13  | 3803.9(18)  | 7146.1(18)  | 7282.2(16) | 26.3(4) |
| C14  | 2352.4(15)  | 7178.6(15)  | 1594.4(13) | 16.4(3) |
| C15  | 1768.1(15)  | 7979.9(15)  | 1995.6(14) | 17.5(3) |
| C16  | 1720.5(16)  | 8884.4(16)  | 1522.5(14) | 19.8(3) |
| C17  | 2266.0(16)  | 9051.3(16)  | 639.0(14)  | 20.3(3) |
| C18  | 2854.3(17)  | 8275.1(16)  | 238.8(14)  | 21.1(3) |
| C19  | 2891.9(16)  | 7360.2(16)  | 705.1(14)  | 18.6(3) |
| C20  | 2231.7(19)  | 10056.2(18) | 146.3(16)  | 27.5(4) |
| C21  | 5311.5(16)  | 7067.6(16)  | 2661.6(14) | 19.7(3) |
| C22  | 6240.3(17)  | 8160.0(18)  | 3786.2(15) | 24.1(3) |
| C23  | 7518.6(17)  | 9064.5(18)  | 3914.0(16) | 26.6(4) |
| C24  | 7930.3(17)  | 8896.1(18)  | 2920.1(17) | 26.1(4) |
| C25  | 7005.6(17)  | 7822.9(18)  | 1784.6(16) | 24.6(3) |
| C26  | 5730.8(17)  | 6926.2(17)  | 1661.4(15) | 22.2(3) |
| C27  | 9341(2)     | 9802(2)     | 3059(2)    | 37.1(5) |
| B1   | 2390.1(17)  | 6041.5(18)  | 1975.9(15) | 17.3(3) |
| B2   | 1027.0(19)  | 4295.6(18)  | 1188.8(16) | 19.8(3) |
| B3   | 2583.5(18)  | 4692.3(18)  | 1029.6(16) | 20.1(3) |
| B4   | 1644(2)     | 3143.0(19)  | 1142.0(17) | 23.2(4) |
| B5   | 3400.0(19)  | 4141.2(19)  | 1924.7(17) | 22.2(4) |
| B6   | 3723.4(19)  | 5116.2(19)  | 3475.8(17) | 21.2(4) |

|     |            |            |            |         |
|-----|------------|------------|------------|---------|
| B7  | 2164.2(19) | 4729.4(18) | 3646.1(17) | 21.5(4) |
| B8  | 874.4(19)  | 3509.8(18) | 2201.8(17) | 22.0(4) |
| B9  | 2341(2)    | 3410(2)    | 2666.9(18) | 24.4(4) |
| B10 | 3894.6(18) | 5939.4(18) | 2473.2(16) | 18.9(3) |

**Anisotropic Displacement Parameters ( $\text{\AA}^2 \times 10^3$ ) for mo\_0804\_CG\_0m. The Anisotropic displacement factor exponent takes the form:  $-2\pi^2[h^2a^{*2}U_{11}+2hka^*b^*U_{12}+\dots]$ .**

| Atom | U <sub>11</sub> | U <sub>22</sub> | U <sub>33</sub> | U <sub>23</sub> | U <sub>13</sub> | U <sub>12</sub> |
|------|-----------------|-----------------|-----------------|-----------------|-----------------|-----------------|
| O1   | 29.8(6)         | 19.1(5)         | 18.5(5)         | 7.8(4)          | 5.6(5)          | 13.0(5)         |
| O2   | 34.6(7)         | 30.0(6)         | 20.1(6)         | 10.3(5)         | 12.7(5)         | 14.3(6)         |
| N1   | 21.4(6)         | 19.5(6)         | 14.5(6)         | 7.6(5)          | 5.1(5)          | 9.0(5)          |
| C1   | 17.4(7)         | 18.5(7)         | 16.4(7)         | 7.6(6)          | 6.0(5)          | 9.0(6)          |
| C2   | 18.3(7)         | 17.7(7)         | 16.8(7)         | 8.2(6)          | 6.1(6)          | 10.1(6)         |
| C3   | 19.8(7)         | 17.2(7)         | 18.2(7)         | 8.4(6)          | 6.4(6)          | 10.1(6)         |
| C4   | 19.5(7)         | 15.5(7)         | 20.4(7)         | 9.0(6)          | 8.9(6)          | 8.9(6)          |
| C5   | 22.9(8)         | 20.5(7)         | 19.7(7)         | 8.9(6)          | 7.3(6)          | 11.7(6)         |
| C6   | 24.5(8)         | 27.8(8)         | 29.0(9)         | 14.8(7)         | 10.8(7)         | 16.6(7)         |
| C7   | 26.8(8)         | 25.8(8)         | 33.0(9)         | 13.6(7)         | 15.8(7)         | 16.6(7)         |
| C8   | 27.5(8)         | 25.2(8)         | 22.8(8)         | 9.5(7)          | 13.0(7)         | 12.7(7)         |
| C9   | 21.2(8)         | 22.5(7)         | 19.7(7)         | 10.0(6)         | 8.9(6)          | 9.5(6)          |
| C10  | 24.2(8)         | 19.5(7)         | 15.5(7)         | 3.8(6)          | 3.8(6)          | 6.3(6)          |
| C11  | 28.0(9)         | 25.3(8)         | 22.7(8)         | 8.3(7)          | 9.8(7)          | 12.9(7)         |
| C12  | 25.5(8)         | 26.8(8)         | 18.7(7)         | 11.4(6)         | 6.4(6)          | 14.9(7)         |
| C13  | 29.6(9)         | 26.1(8)         | 22.7(8)         | 12.7(7)         | 10.0(7)         | 11.7(7)         |
| C14  | 17.2(7)         | 16.0(7)         | 14.2(6)         | 4.8(5)          | 4.7(5)          | 8.3(6)          |
| C15  | 18.6(7)         | 16.1(7)         | 17.3(7)         | 6.1(6)          | 6.8(6)          | 8.8(6)          |
| C16  | 22.1(7)         | 18.3(7)         | 21.2(7)         | 8.1(6)          | 8.0(6)          | 12.2(6)         |
| C17  | 22.5(8)         | 17.6(7)         | 18.3(7)         | 7.4(6)          | 4.9(6)          | 9.3(6)          |
| C18  | 25.9(8)         | 21.3(7)         | 17.9(7)         | 9.5(6)          | 9.1(6)          | 12.0(6)         |
| C19  | 20.8(7)         | 18.7(7)         | 16.2(7)         | 5.8(6)          | 6.3(6)          | 11.3(6)         |
| C20  | 36.1(10)        | 24.0(8)         | 27.5(9)         | 14.8(7)         | 11.4(7)         | 16.7(7)         |
| C21  | 21.7(7)         | 22.3(7)         | 21.2(7)         | 10.4(6)         | 9.2(6)          | 15.1(6)         |
| C22  | 22.9(8)         | 28.4(8)         | 21.5(8)         | 8.4(7)          | 9.5(6)          | 14.5(7)         |
| C23  | 22.3(8)         | 27.5(8)         | 26.2(8)         | 7.0(7)          | 8.3(7)          | 12.8(7)         |
| C24  | 23.9(8)         | 27.2(8)         | 32.7(9)         | 12.9(7)         | 13.1(7)         | 16.4(7)         |
| C25  | 27.6(8)         | 28.8(8)         | 27.0(8)         | 13.9(7)         | 14.9(7)         | 18.9(7)         |
| C26  | 24.1(8)         | 24.3(8)         | 21.7(8)         | 9.3(6)          | 9.5(6)          | 15.3(7)         |
| C27  | 28.3(10)        | 34.3(10)        | 47.1(12)        | 14.5(9)         | 20.0(9)         | 14.1(8)         |
| B1   | 19.6(8)         | 18.2(8)         | 13.7(7)         | 5.3(6)          | 5.5(6)          | 10.7(7)         |
| B2   | 24.3(9)         | 15.1(7)         | 18.3(8)         | 5.8(6)          | 5.7(7)          | 10.3(7)         |
| B3   | 23.7(9)         | 18.3(8)         | 18.3(8)         | 5.9(6)          | 6.1(7)          | 12.7(7)         |
| B4   | 26.8(9)         | 18.4(8)         | 22.6(9)         | 6.5(7)          | 5.0(7)          | 13.2(7)         |
| B5   | 26.9(9)         | 20.6(8)         | 21.4(8)         | 7.9(7)          | 6.9(7)          | 15.4(7)         |
| B6   | 23.7(9)         | 21.9(8)         | 22.7(8)         | 11.3(7)         | 7.5(7)          | 14.6(7)         |

|     |          |         |         |         |        |         |
|-----|----------|---------|---------|---------|--------|---------|
| B7  | 25.0(9)  | 18.9(8) | 21.7(8) | 10.8(7) | 7.3(7) | 11.0(7) |
| B8  | 23.8(9)  | 17.2(8) | 22.6(9) | 8.5(7)  | 5.2(7) | 9.8(7)  |
| B9  | 29.9(10) | 21.1(8) | 25.7(9) | 11.7(7) | 7.9(8) | 15.5(8) |
| B10 | 22.0(8)  | 21.4(8) | 16.9(8) | 7.9(7)  | 7.4(6) | 14.1(7) |

**Bond Lengths for mo\_0804\_CG\_0m.**

| Atom | Atom | Length/Å   | Atom | Atom | Length/Å |
|------|------|------------|------|------|----------|
| O1   | C1   | 1.2177(19) | C17  | C20  | 1.507(2) |
| O2   | C11  | 1.428(2)   | C18  | C19  | 1.388(2) |
| O2   | C13  | 1.418(2)   | C21  | C22  | 1.395(2) |
| N1   | C1   | 1.3532(19) | C21  | C26  | 1.403(2) |
| N1   | C10  | 1.476(2)   | C21  | B10  | 1.571(2) |
| N1   | C12  | 1.469(2)   | C22  | C23  | 1.390(2) |
| C1   | C2   | 1.543(2)   | C23  | C24  | 1.391(2) |
| C2   | C3   | 1.709(2)   | C24  | C25  | 1.395(3) |
| C2   | B1   | 1.809(2)   | C24  | C27  | 1.506(3) |
| C2   | B6   | 1.714(2)   | C25  | C26  | 1.386(2) |
| C2   | B7   | 1.718(2)   | B1   | B2   | 1.800(3) |
| C2   | B10  | 1.736(2)   | B1   | B3   | 1.783(2) |
| C3   | C4   | 1.506(2)   | B1   | B10  | 1.826(2) |
| C3   | B1   | 1.769(2)   | B2   | B3   | 1.764(3) |
| C3   | B2   | 1.710(2)   | B2   | B4   | 1.776(3) |
| C3   | B7   | 1.746(2)   | B2   | B8   | 1.775(3) |
| C3   | B8   | 1.728(2)   | B3   | B4   | 1.782(3) |
| C4   | C5   | 1.397(2)   | B3   | B5   | 1.770(3) |
| C4   | C9   | 1.392(2)   | B3   | B10  | 1.788(3) |
| C5   | C6   | 1.389(2)   | B4   | B5   | 1.774(3) |
| C6   | C7   | 1.386(2)   | B4   | B8   | 1.770(3) |
| C7   | C8   | 1.385(3)   | B4   | B9   | 1.778(3) |
| C8   | C9   | 1.388(2)   | B5   | B6   | 1.768(3) |
| C10  | C11  | 1.507(2)   | B5   | B9   | 1.790(3) |
| C12  | C13  | 1.516(2)   | B5   | B10  | 1.804(3) |
| C14  | C15  | 1.405(2)   | B6   | B7   | 1.773(3) |
| C14  | C19  | 1.401(2)   | B6   | B9   | 1.780(3) |
| C14  | B1   | 1.573(2)   | B6   | B10  | 1.796(3) |
| C15  | C16  | 1.386(2)   | B7   | B8   | 1.775(3) |
| C16  | C17  | 1.394(2)   | B7   | B9   | 1.763(3) |
| C17  | C18  | 1.386(2)   | B8   | B9   | 1.776(3) |

**Bond Angles for mo\_0804\_CG\_0m.**

| Atom | Atom | Atom | Angle/°    | Atom | Atom | Atom | Angle/°    |
|------|------|------|------------|------|------|------|------------|
| C13  | O2   | C11  | 110.04(13) | B3   | B2   | B8   | 108.09(13) |

|     |     |     |            |    |    |     |            |
|-----|-----|-----|------------|----|----|-----|------------|
| C1  | N1  | C10 | 116.75(13) | B4 | B2 | B1  | 109.86(13) |
| C1  | N1  | C12 | 132.66(14) | B8 | B2 | B1  | 110.32(12) |
| C12 | N1  | C10 | 110.59(12) | B8 | B2 | B4  | 59.80(11)  |
| O1  | C1  | N1  | 121.99(14) | B1 | B3 | B10 | 61.49(10)  |
| O1  | C1  | C2  | 116.11(13) | B2 | B3 | B1  | 61.00(10)  |
| N1  | C1  | C2  | 121.90(13) | B2 | B3 | B4  | 60.11(10)  |
| C1  | C2  | C3  | 115.93(12) | B2 | B3 | B5  | 108.36(13) |
| C1  | C2  | B1  | 113.12(12) | B2 | B3 | B10 | 109.36(12) |
| C1  | C2  | B6  | 125.78(13) | B4 | B3 | B1  | 110.34(13) |
| C1  | C2  | B7  | 119.96(12) | B4 | B3 | B10 | 109.29(13) |
| C1  | C2  | B10 | 120.98(12) | B5 | B3 | B1  | 110.83(12) |
| C3  | C2  | B1  | 60.30(9)   | B5 | B3 | B4  | 59.91(11)  |
| C3  | C2  | B6  | 110.42(12) | B5 | B3 | B10 | 60.94(10)  |
| C3  | C2  | B7  | 61.25(10)  | B2 | B4 | B3  | 59.43(10)  |
| C3  | C2  | B10 | 109.86(11) | B2 | B4 | B9  | 108.15(13) |
| B6  | C2  | B1  | 113.37(12) | B5 | B4 | B2  | 107.66(13) |
| B6  | C2  | B7  | 62.22(10)  | B5 | B4 | B3  | 59.71(10)  |
| B6  | C2  | B10 | 62.73(10)  | B5 | B4 | B9  | 60.52(11)  |
| B7  | C2  | B1  | 112.90(12) | B8 | B4 | B2  | 60.08(10)  |
| B7  | C2  | B10 | 113.72(12) | B8 | B4 | B3  | 107.50(13) |
| B10 | C2  | B1  | 61.96(9)   | B8 | B4 | B5  | 108.30(13) |
| C2  | C3  | B1  | 62.65(9)   | B8 | B4 | B9  | 60.08(11)  |
| C2  | C3  | B2  | 110.47(12) | B9 | B4 | B3  | 107.96(13) |
| C2  | C3  | B7  | 59.63(9)   | B3 | B5 | B4  | 60.38(11)  |
| C2  | C3  | B8  | 109.27(12) | B3 | B5 | B9  | 107.96(13) |
| C4  | C3  | C2  | 120.42(12) | B3 | B5 | B10 | 60.02(10)  |
| C4  | C3  | B1  | 119.71(12) | B4 | B5 | B9  | 59.86(11)  |
| C4  | C3  | B2  | 122.11(13) | B4 | B5 | B10 | 108.93(12) |
| C4  | C3  | B7  | 116.22(13) | B6 | B5 | B3  | 107.78(12) |
| C4  | C3  | B8  | 118.38(13) | B6 | B5 | B4  | 108.07(13) |
| B2  | C3  | B1  | 62.28(10)  | B6 | B5 | B9  | 60.04(11)  |
| B2  | C3  | B7  | 112.06(12) | B6 | B5 | B10 | 60.33(10)  |
| B2  | C3  | B8  | 62.16(10)  | B9 | B5 | B10 | 108.73(13) |
| B7  | C3  | B1  | 113.52(12) | C2 | B6 | B5  | 106.16(12) |
| B8  | C3  | B1  | 114.08(12) | C2 | B6 | B7  | 59.01(10)  |
| B8  | C3  | B7  | 61.45(10)  | C2 | B6 | B9  | 105.99(13) |
| C5  | C4  | C3  | 119.13(14) | C2 | B6 | B10 | 59.22(9)   |
| C9  | C4  | C3  | 121.99(14) | B5 | B6 | B7  | 107.73(13) |
| C9  | C4  | C5  | 118.85(15) | B5 | B6 | B9  | 60.58(11)  |
| C6  | C5  | C4  | 120.23(15) | B5 | B6 | B10 | 60.83(10)  |
| C7  | C6  | C5  | 120.57(16) | B7 | B6 | B9  | 59.48(11)  |
| C8  | C7  | C6  | 119.34(16) | B7 | B6 | B10 | 108.26(12) |
| C7  | C8  | C9  | 120.49(16) | B9 | B6 | B10 | 109.55(13) |
| C8  | C9  | C4  | 120.51(15) | C2 | B7 | C3  | 59.12(9)   |
| N1  | C10 | C11 | 109.48(13) | C2 | B7 | B6  | 58.77(10)  |

|     |     |     |            |     |     |    |            |
|-----|-----|-----|------------|-----|-----|----|------------|
| O2  | C11 | C10 | 111.14(14) | C2  | B7  | B8 | 106.71(12) |
| N1  | C12 | C13 | 109.61(14) | C2  | B7  | B9 | 106.56(13) |
| O2  | C13 | C12 | 112.09(14) | C3  | B7  | B6 | 106.03(12) |
| C15 | C14 | B1  | 127.12(14) | C3  | B7  | B8 | 58.78(10)  |
| C19 | C14 | C15 | 116.20(14) | C3  | B7  | B9 | 106.03(13) |
| C19 | C14 | B1  | 116.56(13) | B6  | B7  | B8 | 108.40(13) |
| C16 | C15 | C14 | 121.46(14) | B9  | B7  | B6 | 60.45(11)  |
| C15 | C16 | C17 | 121.40(14) | B9  | B7  | B8 | 60.26(11)  |
| C16 | C17 | C20 | 121.03(15) | C3  | B8  | B2 | 58.43(10)  |
| C18 | C17 | C16 | 117.88(14) | C3  | B8  | B4 | 105.52(13) |
| C18 | C17 | C20 | 121.09(15) | C3  | B8  | B7 | 59.77(10)  |
| C17 | C18 | C19 | 120.73(15) | C3  | B8  | B9 | 106.23(13) |
| C18 | C19 | C14 | 122.33(14) | B2  | B8  | B9 | 108.26(14) |
| C22 | C21 | C26 | 116.67(15) | B4  | B8  | B2 | 60.12(11)  |
| C22 | C21 | B10 | 124.44(14) | B4  | B8  | B7 | 107.49(14) |
| C26 | C21 | B10 | 118.70(14) | B4  | B8  | B9 | 60.18(11)  |
| C23 | C22 | C21 | 121.84(16) | B7  | B8  | B2 | 107.69(13) |
| C22 | C23 | C24 | 120.90(16) | B7  | B8  | B9 | 59.53(11)  |
| C23 | C24 | C25 | 117.93(16) | B4  | B9  | B5 | 59.62(11)  |
| C23 | C24 | C27 | 121.66(17) | B4  | B9  | B6 | 107.36(13) |
| C25 | C24 | C27 | 120.37(16) | B6  | B9  | B5 | 59.39(11)  |
| C26 | C25 | C24 | 120.91(16) | B7  | B9  | B4 | 107.68(13) |
| C25 | C26 | C21 | 121.72(16) | B7  | B9  | B5 | 107.25(13) |
| C2  | B1  | B10 | 57.04(9)   | B7  | B9  | B6 | 60.07(11)  |
| C3  | B1  | C2  | 57.05(9)   | B7  | B9  | B8 | 60.21(11)  |
| C3  | B1  | B2  | 57.25(9)   | B8  | B9  | B4 | 59.75(11)  |
| C3  | B1  | B3  | 102.41(12) | B8  | B9  | B5 | 107.33(13) |
| C3  | B1  | B10 | 103.29(11) | B8  | B9  | B6 | 108.06(13) |
| C14 | B1  | C2  | 129.42(13) | C2  | B10 | B1 | 60.99(9)   |
| C14 | B1  | C3  | 126.19(13) | C2  | B10 | B3 | 104.51(12) |
| C14 | B1  | B2  | 120.90(13) | C2  | B10 | B5 | 103.70(12) |
| C14 | B1  | B3  | 121.95(13) | C2  | B10 | B6 | 58.04(9)   |
| C14 | B1  | B10 | 124.16(13) | C21 | B10 | C2 | 123.43(13) |
| B2  | B1  | C2  | 102.21(11) | C21 | B10 | B1 | 122.37(13) |
| B2  | B1  | B10 | 106.11(12) | C21 | B10 | B3 | 125.59(14) |
| B3  | B1  | C2  | 101.73(11) | C21 | B10 | B5 | 122.75(13) |
| B3  | B1  | B2  | 58.96(10)  | C21 | B10 | B6 | 120.03(13) |
| B3  | B1  | B10 | 59.38(10)  | B3  | B10 | B1 | 59.13(10)  |
| C3  | B2  | B1  | 60.46(9)   | B3  | B10 | B5 | 59.04(10)  |
| C3  | B2  | B3  | 105.68(12) | B3  | B10 | B6 | 105.82(13) |
| C3  | B2  | B4  | 106.04(12) | B5  | B10 | B1 | 107.39(12) |
| C3  | B2  | B8  | 59.41(10)  | B6  | B10 | B1 | 108.80(12) |
| B3  | B2  | B1  | 60.04(10)  | B6  | B10 | B5 | 58.84(10)  |
| B3  | B2  | B4  | 60.46(11)  |     |     |    |            |



**Torsion Angles for mo\_0804\_CG\_0m.**

| <b>A</b> | <b>B</b> | <b>C</b> | <b>D</b> | <b>Angle/°</b> | <b>A</b> | <b>B</b> | <b>C</b> | <b>D</b> | <b>Angle/°</b> |
|----------|----------|----------|----------|----------------|----------|----------|----------|----------|----------------|
| O1       | C1       | C2       | C3       | -65.63(18)     | B2       | B3       | B4       | B8       | -37.48(12)     |
| O1       | C1       | C2       | B1       | 1.33(19)       | B2       | B3       | B4       | B9       | -100.89(14)    |
| O1       | C1       | C2       | B6       | 148.40(15)     | B2       | B3       | B5       | B4       | 36.94(12)      |
| O1       | C1       | C2       | B7       | -135.94(15)    | B2       | B3       | B5       | B6       | -64.15(16)     |
| O1       | C1       | C2       | B10      | 71.47(18)      | B2       | B3       | B5       | B9       | -0.73(16)      |
| N1       | C1       | C2       | C3       | 113.49(15)     | B2       | B3       | B5       | B10      | -102.42(13)    |
| N1       | C1       | C2       | B1       | -179.55(13)    | B2       | B3       | B10      | C2       | 3.28(16)       |
| N1       | C1       | C2       | B6       | -32.5(2)       | B2       | B3       | B10      | C21      | -148.97(14)    |
| N1       | C1       | C2       | B7       | 43.2(2)        | B2       | B3       | B10      | B1       | -39.13(12)     |
| N1       | C1       | C2       | B10      | -109.41(16)    | B2       | B3       | B10      | B5       | 100.76(14)     |
| N1       | C10      | C11      | O2       | 58.47(18)      | B2       | B3       | B10      | B6       | 63.62(15)      |
| N1       | C12      | C13      | O2       | -56.52(18)     | B2       | B4       | B5       | B3       | -36.48(12)     |
| C1       | N1       | C10      | C11      | 124.18(15)     | B2       | B4       | B5       | B6       | 64.12(16)      |
| C1       | N1       | C12      | C13      | -125.60(18)    | B2       | B4       | B5       | B9       | 101.28(14)     |
| C1       | C2       | C3       | C4       | -7.05(19)      | B2       | B4       | B5       | B10      | 0.13(17)       |
| C1       | C2       | C3       | B1       | 103.02(13)     | B2       | B4       | B8       | C3       | -38.15(11)     |
| C1       | C2       | C3       | B2       | 144.25(12)     | B2       | B4       | B8       | B7       | -100.75(13)    |
| C1       | C2       | C3       | B7       | -111.51(14)    | B2       | B4       | B8       | B9       | -138.24(13)    |
| C1       | C2       | C3       | B8       | -149.17(13)    | B2       | B4       | B9       | B5       | -100.45(14)    |
| C1       | C2       | B1       | C3       | -107.69(13)    | B2       | B4       | B9       | B6       | -63.75(17)     |
| C1       | C2       | B1       | C14      | 4.5(2)         | B2       | B4       | B9       | B7       | -0.44(18)      |
| C1       | C2       | B1       | B2       | -144.57(12)    | B2       | B4       | B9       | B8       | 37.41(13)      |
| C1       | C2       | B1       | B3       | 155.02(12)     | B2       | B8       | B9       | B4       | -37.45(12)     |
| C1       | C2       | B1       | B10      | 114.00(14)     | B2       | B8       | B9       | B5       | -0.13(17)      |
| C1       | C2       | B6       | B5       | -150.27(14)    | B2       | B8       | B9       | B6       | 62.52(16)      |
| C1       | C2       | B6       | B7       | 108.43(16)     | B2       | B8       | B9       | B7       | 100.21(14)     |
| C1       | C2       | B6       | B9       | 146.41(14)     | B3       | B1       | B2       | C3       | 133.25(12)     |
| C1       | C2       | B6       | B10      | -110.02(16)    | B3       | B1       | B2       | B4       | 35.60(12)      |
| C1       | C2       | B7       | C3       | 105.04(14)     | B3       | B1       | B2       | B8       | 99.71(14)      |
| C1       | C2       | B7       | B6       | -117.33(15)    | B3       | B1       | B10      | C2       | -131.70(13)    |
| C1       | C2       | B7       | B8       | 140.93(14)     | B3       | B1       | B10      | C21      | 115.07(16)     |
| C1       | C2       | B7       | B9       | -155.88(13)    | B3       | B1       | B10      | B5       | -35.38(12)     |
| C1       | C2       | B10      | C21      | 10.1(2)        | B3       | B1       | B10      | B6       | -97.59(14)     |
| C1       | C2       | B10      | B1       | -101.49(14)    | B3       | B2       | B4       | B5       | 36.60(12)      |
| C1       | C2       | B10      | B3       | -142.94(13)    | B3       | B2       | B4       | B8       | 137.96(13)     |
| C1       | C2       | B10      | B5       | 156.00(13)     | B3       | B2       | B4       | B9       | 100.56(14)     |
| C1       | C2       | B10      | B6       | 117.24(15)     | B3       | B2       | B8       | C3       | 97.89(13)      |
| C2       | C3       | C4       | C5       | 141.68(14)     | B3       | B2       | B8       | B4       | -37.80(12)     |
| C2       | C3       | C4       | C9       | -40.5(2)       | B3       | B2       | B8       | B7       | 62.60(16)      |
| C2       | C3       | B1       | C14      | -117.61(16)    | B3       | B2       | B8       | B9       | -0.32(16)      |
| C2       | C3       | B1       | B2       | 135.78(12)     | B3       | B4       | B5       | B6       | 100.60(13)     |

|    |    |     |     |             |    |    |     |     |             |
|----|----|-----|-----|-------------|----|----|-----|-----|-------------|
| C2 | C3 | B1  | B3  | 96.05(12)   | B3 | B4 | B5  | B9  | 137.76(13)  |
| C2 | C3 | B1  | B10 | 34.99(10)   | B3 | B4 | B5  | B10 | 36.61(12)   |
| C2 | C3 | B2  | B1  | -41.40(11)  | B3 | B4 | B8  | C3  | -0.96(16)   |
| C2 | C3 | B2  | B3  | -0.44(15)   | B3 | B4 | B8  | B2  | 37.19(12)   |
| C2 | C3 | B2  | B4  | 62.68(15)   | B3 | B4 | B8  | B7  | -63.55(15)  |
| C2 | C3 | B2  | B8  | 101.61(13)  | B3 | B4 | B8  | B9  | -101.05(14) |
| C2 | C3 | B7  | B6  | -36.84(11)  | B3 | B4 | B9  | B5  | -37.61(12)  |
| C2 | C3 | B7  | B8  | -138.96(13) | B3 | B4 | B9  | B6  | -0.90(17)   |
| C2 | C3 | B7  | B9  | -100.00(14) | B3 | B4 | B9  | B7  | 62.41(17)   |
| C2 | C3 | B8  | B2  | -103.55(13) | B3 | B4 | B9  | B8  | 100.26(14)  |
| C2 | C3 | B8  | B4  | -64.60(15)  | B3 | B5 | B6  | C2  | 1.35(17)    |
| C2 | C3 | B8  | B7  | 36.88(12)   | B3 | B5 | B6  | B7  | 63.30(16)   |
| C2 | C3 | B8  | B9  | -1.78(16)   | B3 | B5 | B6  | B9  | 100.89(14)  |
| C2 | B1 | B2  | C3  | 36.79(10)   | B3 | B5 | B6  | B10 | -38.13(12)  |
| C2 | B1 | B2  | B3  | -96.46(12)  | B3 | B5 | B9  | B4  | 37.90(12)   |
| C2 | B1 | B2  | B4  | -60.86(15)  | B3 | B5 | B9  | B6  | -100.58(13) |
| C2 | B1 | B2  | B8  | 3.25(16)    | B3 | B5 | B9  | B7  | -62.85(16)  |
| C2 | B1 | B3  | B2  | 97.31(12)   | B3 | B5 | B9  | B8  | 0.52(17)    |
| C2 | B1 | B3  | B4  | 61.73(15)   | B3 | B5 | B10 | C2  | 98.88(13)   |
| C2 | B1 | B3  | B5  | -2.73(16)   | B3 | B5 | B10 | C21 | -114.90(17) |
| C2 | B1 | B3  | B10 | -39.78(11)  | B3 | B5 | B10 | B1  | 35.41(12)   |
| C2 | B1 | B10 | C21 | -113.23(16) | B3 | B5 | B10 | B6  | 137.25(14)  |
| C2 | B1 | B10 | B3  | 131.70(13)  | B4 | B2 | B3  | B1  | -141.00(13) |
| C2 | B1 | B10 | B5  | 96.32(13)   | B4 | B2 | B3  | B5  | -36.86(12)  |
| C2 | B1 | B10 | B6  | 34.11(11)   | B4 | B2 | B3  | B10 | -101.65(14) |
| C2 | B6 | B7  | C3  | 36.99(11)   | B4 | B2 | B8  | C3  | 135.68(13)  |
| C2 | B6 | B7  | B8  | 98.77(13)   | B4 | B2 | B8  | B7  | 100.40(14)  |
| C2 | B6 | B7  | B9  | 136.63(13)  | B4 | B2 | B8  | B9  | 37.48(12)   |
| C2 | B6 | B9  | B4  | 63.03(16)   | B4 | B3 | B5  | B6  | -101.09(15) |
| C2 | B6 | B9  | B5  | 99.83(13)   | B4 | B3 | B5  | B9  | -37.67(12)  |
| C2 | B6 | B9  | B7  | -37.76(12)  | B4 | B3 | B5  | B10 | -139.37(13) |
| C2 | B6 | B9  | B8  | -0.02(17)   | B4 | B3 | B10 | C2  | -60.82(15)  |
| C2 | B6 | B10 | C21 | 112.92(16)  | B4 | B3 | B10 | C21 | 146.93(15)  |
| C2 | B6 | B10 | B1  | -35.31(11)  | B4 | B3 | B10 | B1  | -103.24(14) |
| C2 | B6 | B10 | B3  | -97.47(13)  | B4 | B3 | B10 | B5  | 36.65(12)   |
| C2 | B6 | B10 | B5  | -134.70(13) | B4 | B3 | B10 | B6  | -0.49(16)   |
| C2 | B7 | B8  | C3  | -36.04(11)  | B4 | B5 | B6  | C2  | -62.46(15)  |
| C2 | B7 | B8  | B2  | -1.32(17)   | B4 | B5 | B6  | B7  | -0.51(16)   |
| C2 | B7 | B8  | B4  | 62.08(15)   | B4 | B5 | B6  | B9  | 37.08(12)   |
| C2 | B7 | B8  | B9  | 99.86(14)   | B4 | B5 | B6  | B10 | -101.94(13) |
| C2 | B7 | B9  | B4  | -62.47(16)  | B4 | B5 | B9  | B6  | -138.49(13) |
| C2 | B7 | B9  | B5  | 0.35(17)    | B4 | B5 | B9  | B7  | -100.76(14) |
| C2 | B7 | B9  | B6  | 37.78(12)   | B4 | B5 | B9  | B8  | -37.38(12)  |
| C2 | B7 | B9  | B8  | -100.11(13) | B4 | B5 | B10 | C2  | 62.12(15)   |
| C3 | C2 | B1  | C14 | 112.22(17)  | B4 | B5 | B10 | C21 | -151.66(15) |

|    |    |     |     |             |    |    |     |     |             |
|----|----|-----|-----|-------------|----|----|-----|-----|-------------|
| C3 | C2 | B1  | B2  | -36.89(10)  | B4 | B5 | B10 | B1  | -1.35(17)   |
| C3 | C2 | B1  | B3  | -97.29(12)  | B4 | B5 | B10 | B3  | -36.76(12)  |
| C3 | C2 | B1  | B10 | -138.31(12) | B4 | B5 | B10 | B6  | 100.49(14)  |
| C3 | C2 | B6  | B5  | 62.22(15)   | B4 | B8 | B9  | B5  | 37.32(12)   |
| C3 | C2 | B6  | B7  | -39.08(12)  | B4 | B8 | B9  | B6  | 99.97(14)   |
| C3 | C2 | B6  | B9  | -1.10(16)   | B4 | B8 | B9  | B7  | 137.66(14)  |
| C3 | C2 | B6  | B10 | 102.47(13)  | B5 | B3 | B4  | B2  | 138.85(13)  |
| C3 | C2 | B7  | B6  | 137.63(13)  | B5 | B3 | B4  | B8  | 101.37(14)  |
| C3 | C2 | B7  | B8  | 35.89(11)   | B5 | B3 | B4  | B9  | 37.96(12)   |
| C3 | C2 | B7  | B9  | 99.08(13)   | B5 | B3 | B10 | C2  | -97.48(13)  |
| C3 | C2 | B10 | C21 | 149.47(14)  | B5 | B3 | B10 | C21 | 110.27(17)  |
| C3 | C2 | B10 | B1  | 37.90(11)   | B5 | B3 | B10 | B1  | -139.89(13) |
| C3 | C2 | B10 | B3  | -3.55(15)   | B5 | B3 | B10 | B6  | -37.14(12)  |
| C3 | C2 | B10 | B5  | -64.61(14)  | B5 | B4 | B8  | C3  | 62.12(15)   |
| C3 | C2 | B10 | B6  | -103.37(13) | B5 | B4 | B8  | B2  | 100.28(14)  |
| C3 | C4 | C5  | C6  | 178.55(14)  | B5 | B4 | B8  | B7  | -0.47(16)   |
| C3 | C4 | C9  | C8  | -179.25(15) | B5 | B4 | B8  | B9  | -37.96(12)  |
| C3 | B1 | B2  | B3  | -133.25(12) | B5 | B4 | B9  | B6  | 36.70(12)   |
| C3 | B1 | B2  | B4  | -97.65(13)  | B5 | B4 | B9  | B7  | 100.02(14)  |
| C3 | B1 | B2  | B8  | -33.53(12)  | B5 | B4 | B9  | B8  | 137.86(13)  |
| C3 | B1 | B3  | B2  | 38.85(11)   | B5 | B6 | B7  | C2  | -98.56(13)  |
| C3 | B1 | B3  | B4  | 3.27(16)    | B5 | B6 | B7  | C3  | -61.56(15)  |
| C3 | B1 | B3  | B5  | -61.19(15)  | B5 | B6 | B7  | B8  | 0.22(16)    |
| C3 | B1 | B3  | B10 | -98.24(12)  | B5 | B6 | B7  | B9  | 38.08(12)   |
| C3 | B1 | B10 | C2  | -34.99(10)  | B5 | B6 | B9  | B4  | -36.81(12)  |
| C3 | B1 | B10 | C21 | -148.22(14) | B5 | B6 | B9  | B7  | -137.59(13) |
| C3 | B1 | B10 | B3  | 96.71(12)   | B5 | B6 | B9  | B8  | -99.85(14)  |
| C3 | B1 | B10 | B5  | 61.33(14)   | B5 | B6 | B10 | C2  | 134.70(13)  |
| C3 | B1 | B10 | B6  | -0.89(15)   | B5 | B6 | B10 | C21 | -112.38(16) |
| C3 | B2 | B3  | B1  | -41.17(11)  | B5 | B6 | B10 | B1  | 99.39(13)   |
| C3 | B2 | B3  | B4  | 99.84(13)   | B5 | B6 | B10 | B3  | 37.23(12)   |
| C3 | B2 | B3  | B5  | 62.98(15)   | B6 | C2 | C3  | C4  | 143.96(13)  |
| C3 | B2 | B3  | B10 | -1.81(16)   | B6 | C2 | C3  | B1  | -105.96(13) |
| C3 | B2 | B4  | B3  | -99.23(13)  | B6 | C2 | C3  | B2  | -64.73(15)  |
| C3 | B2 | B4  | B5  | -62.62(16)  | B6 | C2 | C3  | B7  | 39.51(12)   |
| C3 | B2 | B4  | B8  | 38.74(12)   | B6 | C2 | C3  | B8  | 1.85(16)    |
| C3 | B2 | B4  | B9  | 1.33(17)    | B6 | C2 | B1  | C3  | 101.02(13)  |
| C3 | B2 | B8  | B4  | -135.68(13) | B6 | C2 | B1  | C14 | -146.76(15) |
| C3 | B2 | B8  | B7  | -35.29(12)  | B6 | C2 | B1  | B2  | 64.13(15)   |
| C3 | B2 | B8  | B9  | -98.20(14)  | B6 | C2 | B1  | B3  | 3.73(16)    |
| C3 | B7 | B8  | B2  | 34.72(12)   | B6 | C2 | B1  | B10 | -37.29(12)  |
| C3 | B7 | B8  | B4  | 98.12(13)   | B6 | C2 | B7  | C3  | -137.63(12) |
| C3 | B7 | B8  | B9  | 135.90(13)  | B6 | C2 | B7  | B8  | -101.74(14) |
| C3 | B7 | B9  | B4  | -0.62(17)   | B6 | C2 | B7  | B9  | -38.55(12)  |
| C3 | B7 | B9  | B5  | 62.21(16)   | B6 | C2 | B10 | C21 | -107.16(16) |

|     |     |     |     |             |    |    |     |     |             |
|-----|-----|-----|-----|-------------|----|----|-----|-----|-------------|
| C3  | B7  | B9  | B6  | 99.63(13)   | B6 | C2 | B10 | B1  | 141.27(13)  |
| C3  | B7  | B9  | B8  | -38.25(12)  | B6 | C2 | B10 | B3  | 99.82(13)   |
| C3  | B8  | B9  | B4  | -98.88(14)  | B6 | C2 | B10 | B5  | 38.76(12)   |
| C3  | B8  | B9  | B5  | -61.56(16)  | B6 | B5 | B9  | B4  | 138.49(13)  |
| C3  | B8  | B9  | B6  | 1.09(17)    | B6 | B5 | B9  | B7  | 37.73(12)   |
| C3  | B8  | B9  | B7  | 38.77(12)   | B6 | B5 | B9  | B8  | 101.11(14)  |
| C4  | C3  | B1  | C2  | 111.18(15)  | B6 | B5 | B10 | C2  | -38.37(11)  |
| C4  | C3  | B1  | C14 | -6.4(2)     | B6 | B5 | B10 | C21 | 107.85(16)  |
| C4  | C3  | B1  | B2  | -113.05(15) | B6 | B5 | B10 | B1  | -101.84(13) |
| C4  | C3  | B1  | B3  | -152.77(13) | B6 | B5 | B10 | B3  | -137.25(14) |
| C4  | C3  | B1  | B10 | 146.17(13)  | B6 | B7 | B8  | C3  | -97.96(13)  |
| C4  | C3  | B2  | B1  | 109.34(15)  | B6 | B7 | B8  | B2  | -63.24(16)  |
| C4  | C3  | B2  | B3  | 150.30(13)  | B6 | B7 | B8  | B4  | 0.15(16)    |
| C4  | C3  | B2  | B4  | -146.58(14) | B6 | B7 | B8  | B9  | 37.94(12)   |
| C4  | C3  | B2  | B8  | -107.65(16) | B6 | B7 | B9  | B4  | -100.25(14) |
| C4  | C3  | B7  | C2  | -111.45(14) | B6 | B7 | B9  | B5  | -37.43(12)  |
| C4  | C3  | B7  | B6  | -148.29(13) | B6 | B7 | B9  | B8  | -137.89(13) |
| C4  | C3  | B7  | B8  | 109.59(15)  | B7 | C2 | C3  | C4  | 104.46(15)  |
| C4  | C3  | B7  | B9  | 148.54(14)  | B7 | C2 | C3  | B1  | -145.47(12) |
| C4  | C3  | B8  | B2  | 113.45(15)  | B7 | C2 | C3  | B2  | -104.24(13) |
| C4  | C3  | B8  | B4  | 152.40(13)  | B7 | C2 | C3  | B8  | -37.66(12)  |
| C4  | C3  | B8  | B7  | -106.12(15) | B7 | C2 | B1  | C3  | 32.65(12)   |
| C4  | C3  | B8  | B9  | -144.78(14) | B7 | C2 | B1  | C14 | 144.87(15)  |
| C4  | C5  | C6  | C7  | 0.4(2)      | B7 | C2 | B1  | B2  | -4.23(15)   |
| C5  | C4  | C9  | C8  | -1.4(2)     | B7 | C2 | B1  | B3  | -64.64(15)  |
| C5  | C6  | C7  | C8  | -0.7(3)     | B7 | C2 | B1  | B10 | -105.66(14) |
| C6  | C7  | C8  | C9  | -0.1(3)     | B7 | C2 | B6  | B5  | 101.30(14)  |
| C7  | C8  | C9  | C4  | 1.1(3)      | B7 | C2 | B6  | B9  | 37.98(12)   |
| C9  | C4  | C5  | C6  | 0.6(2)      | B7 | C2 | B6  | B10 | 141.55(13)  |
| C10 | N1  | C1  | O1  | -0.5(2)     | B7 | C2 | B10 | C21 | -144.10(15) |
| C10 | N1  | C1  | C2  | -179.56(13) | B7 | C2 | B10 | B1  | 104.33(13)  |
| C10 | N1  | C12 | C13 | 54.74(17)   | B7 | C2 | B10 | B3  | 62.88(15)   |
| C11 | O2  | C13 | C12 | 58.79(18)   | B7 | C2 | B10 | B5  | 1.82(16)    |
| C12 | N1  | C1  | O1  | 179.87(16)  | B7 | C2 | B10 | B6  | -36.94(12)  |
| C12 | N1  | C1  | C2  | 0.8(3)      | B7 | C3 | C4  | C5  | -149.68(14) |
| C12 | N1  | C10 | C11 | -56.10(17)  | B7 | C3 | C4  | C9  | 28.2(2)     |
| C13 | O2  | C11 | C10 | -59.72(18)  | B7 | C3 | B1  | C2  | -32.24(11)  |
| C14 | C15 | C16 | C17 | -0.8(2)     | B7 | C3 | B1  | C14 | -149.85(14) |
| C14 | B1  | B2  | C3  | -115.68(15) | B7 | C3 | B1  | B2  | 103.54(13)  |
| C14 | B1  | B2  | B3  | 111.07(16)  | B7 | C3 | B1  | B3  | 63.82(15)   |
| C14 | B1  | B2  | B4  | 146.67(14)  | B7 | C3 | B1  | B10 | 2.75(15)    |
| C14 | B1  | B2  | B8  | -149.21(14) | B7 | C3 | B2  | B1  | -105.87(13) |
| C14 | B1  | B3  | B2  | -109.33(16) | B7 | C3 | B2  | B3  | -64.91(15)  |
| C14 | B1  | B3  | B4  | -144.91(14) | B7 | C3 | B2  | B4  | -1.79(17)   |
| C14 | B1  | B3  | B5  | 150.62(14)  | B7 | C3 | B2  | B8  | 37.14(13)   |

|     |     |     |     |             |    |    |     |     |             |
|-----|-----|-----|-----|-------------|----|----|-----|-----|-------------|
| C14 | B1  | B3  | B10 | 113.58(16)  | B7 | C3 | B8  | B2  | -140.43(14) |
| C14 | B1  | B10 | C2  | 118.34(16)  | B7 | C3 | B8  | B4  | -101.48(14) |
| C14 | B1  | B10 | C21 | 5.1(2)      | B7 | C3 | B8  | B9  | -38.66(12)  |
| C14 | B1  | B10 | B3  | -109.96(16) | B7 | B6 | B9  | B4  | 100.79(14)  |
| C14 | B1  | B10 | B5  | -145.34(14) | B7 | B6 | B9  | B5  | 137.59(13)  |
| C14 | B1  | B10 | B6  | 152.44(14)  | B7 | B6 | B9  | B8  | 37.74(12)   |
| C15 | C14 | C19 | C18 | -0.1(2)     | B7 | B6 | B10 | C2  | 34.15(12)   |
| C15 | C14 | B1  | C2  | -58.4(2)    | B7 | B6 | B10 | C21 | 147.07(14)  |
| C15 | C14 | B1  | C3  | 15.9(2)     | B7 | B6 | B10 | B1  | -1.16(16)   |
| C15 | C14 | B1  | B2  | 85.78(19)   | B7 | B6 | B10 | B3  | -63.32(15)  |
| C15 | C14 | B1  | B3  | 156.21(15)  | B7 | B6 | B10 | B5  | -100.55(14) |
| C15 | C14 | B1  | B10 | -131.38(16) | B7 | B8 | B9  | B4  | -137.66(14) |
| C15 | C16 | C17 | C18 | 0.4(2)      | B7 | B8 | B9  | B5  | -100.33(14) |
| C15 | C16 | C17 | C20 | -178.89(15) | B7 | B8 | B9  | B6  | -37.68(12)  |
| C16 | C17 | C18 | C19 | 0.2(2)      | B8 | C3 | C4  | C5  | -79.53(18)  |
| C17 | C18 | C19 | C14 | -0.3(2)     | B8 | C3 | C4  | C9  | 98.33(18)   |
| C19 | C14 | C15 | C16 | 0.7(2)      | B8 | C3 | B1  | C2  | -100.12(13) |
| C19 | C14 | B1  | C2  | 125.54(16)  | B8 | C3 | B1  | C14 | 142.27(15)  |
| C19 | C14 | B1  | C3  | -160.18(14) | B8 | C3 | B1  | B2  | 35.65(12)   |
| C19 | C14 | B1  | B2  | -90.26(17)  | B8 | C3 | B1  | B3  | -4.07(16)   |
| C19 | C14 | B1  | B3  | -19.8(2)    | B8 | C3 | B1  | B10 | -65.13(15)  |
| C19 | C14 | B1  | B10 | 52.6(2)     | B8 | C3 | B2  | B1  | -143.00(13) |
| C20 | C17 | C18 | C19 | 179.45(15)  | B8 | C3 | B2  | B3  | -102.05(13) |
| C21 | C22 | C23 | C24 | -1.2(3)     | B8 | C3 | B2  | B4  | -38.92(12)  |
| C22 | C21 | C26 | C25 | 0.3(2)      | B8 | C3 | B7  | C2  | 138.96(13)  |
| C22 | C21 | B10 | C2  | 22.1(2)     | B8 | C3 | B7  | B6  | 102.12(14)  |
| C22 | C21 | B10 | B1  | 96.51(19)   | B8 | C3 | B7  | B9  | 38.95(13)   |
| C22 | C21 | B10 | B3  | 169.44(15)  | B8 | B2 | B3  | B1  | -103.50(13) |
| C22 | C21 | B10 | B5  | -117.52(18) | B8 | B2 | B3  | B4  | 37.50(12)   |
| C22 | C21 | B10 | B6  | -47.3(2)    | B8 | B2 | B3  | B5  | 0.65(16)    |
| C22 | C23 | C24 | C25 | 2.3(3)      | B8 | B2 | B3  | B10 | -64.14(15)  |
| C22 | C23 | C24 | C27 | -175.49(17) | B8 | B2 | B4  | B3  | -137.96(13) |
| C23 | C24 | C25 | C26 | -2.1(3)     | B8 | B2 | B4  | B5  | -101.36(14) |
| C24 | C25 | C26 | C21 | 0.8(3)      | B8 | B2 | B4  | B9  | -37.41(13)  |
| C26 | C21 | C22 | C23 | -0.1(2)     | B8 | B4 | B5  | B3  | -99.99(14)  |
| C26 | C21 | B10 | C2  | -163.12(14) | B8 | B4 | B5  | B6  | 0.61(17)    |
| C26 | C21 | B10 | B1  | -88.75(18)  | B8 | B4 | B5  | B9  | 37.77(12)   |
| C26 | C21 | B10 | B3  | -15.8(2)    | B8 | B4 | B5  | B10 | -63.38(16)  |
| C26 | C21 | B10 | B5  | 57.2(2)     | B8 | B4 | B9  | B5  | -137.86(13) |
| C26 | C21 | B10 | B6  | 127.42(16)  | B8 | B4 | B9  | B6  | -101.16(14) |
| C27 | C24 | C25 | C26 | 175.70(17)  | B8 | B4 | B9  | B7  | -37.85(13)  |
| B1  | C2  | C3  | C4  | -110.08(14) | B8 | B7 | B9  | B4  | 37.64(13)   |
| B1  | C2  | C3  | B2  | 41.23(11)   | B8 | B7 | B9  | B5  | 100.46(14)  |
| B1  | C2  | C3  | B7  | 145.47(12)  | B8 | B7 | B9  | B6  | 137.89(13)  |
| B1  | C2  | C3  | B8  | 107.80(13)  | B9 | B4 | B5  | B3  | -137.76(13) |

|    |     |     |     |             |     |     |     |     |             |
|----|-----|-----|-----|-------------|-----|-----|-----|-----|-------------|
| B1 | C2  | B6  | B5  | -3.27(17)   | B9  | B4  | B5  | B6  | -37.16(12)  |
| B1 | C2  | B6  | B7  | -104.56(13) | B9  | B4  | B5  | B10 | -101.15(14) |
| B1 | C2  | B6  | B9  | -66.58(15)  | B9  | B4  | B8  | C3  | 100.09(13)  |
| B1 | C2  | B6  | B10 | 36.98(12)   | B9  | B4  | B8  | B2  | 138.24(13)  |
| B1 | C2  | B7  | C3  | -32.32(11)  | B9  | B4  | B8  | B7  | 37.49(12)   |
| B1 | C2  | B7  | B6  | 105.32(13)  | B9  | B5  | B6  | C2  | -99.54(14)  |
| B1 | C2  | B7  | B8  | 3.58(17)    | B9  | B5  | B6  | B7  | -37.59(12)  |
| B1 | C2  | B7  | B9  | 66.77(15)   | B9  | B5  | B6  | B10 | -139.02(13) |
| B1 | C2  | B10 | C21 | 111.57(16)  | B9  | B5  | B10 | C2  | -1.50(16)   |
| B1 | C2  | B10 | B3  | -41.45(11)  | B9  | B5  | B10 | C21 | 144.71(15)  |
| B1 | C2  | B10 | B5  | -102.51(13) | B9  | B5  | B10 | B1  | -64.98(15)  |
| B1 | C2  | B10 | B6  | -141.27(13) | B9  | B5  | B10 | B3  | -100.39(14) |
| B1 | C3  | C4  | C5  | 67.85(19)   | B9  | B5  | B10 | B6  | 36.86(12)   |
| B1 | C3  | C4  | C9  | -114.30(16) | B9  | B6  | B7  | C2  | -136.63(13) |
| B1 | C3  | B2  | B3  | 40.96(11)   | B9  | B6  | B7  | C3  | -99.64(13)  |
| B1 | C3  | B2  | B4  | 104.08(14)  | B9  | B6  | B7  | B8  | -37.86(12)  |
| B1 | C3  | B2  | B8  | 143.00(13)  | B9  | B6  | B10 | C2  | 97.39(14)   |
| B1 | C3  | B7  | C2  | 33.31(12)   | B9  | B6  | B10 | C21 | -149.69(14) |
| B1 | C3  | B7  | B6  | -3.53(16)   | B9  | B6  | B10 | B1  | 62.08(16)   |
| B1 | C3  | B7  | B8  | -105.65(14) | B9  | B6  | B10 | B3  | -0.08(17)   |
| B1 | C3  | B7  | B9  | -66.70(15)  | B9  | B6  | B10 | B5  | -37.31(13)  |
| B1 | C3  | B8  | B2  | -35.70(12)  | B9  | B7  | B8  | C3  | -135.90(13) |
| B1 | C3  | B8  | B4  | 3.26(17)    | B9  | B7  | B8  | B2  | -101.18(14) |
| B1 | C3  | B8  | B7  | 104.74(14)  | B9  | B7  | B8  | B4  | -37.79(12)  |
| B1 | C3  | B8  | B9  | 66.08(16)   | B10 | C2  | C3  | C4  | -148.70(13) |
| B1 | C14 | C15 | C16 | -175.37(15) | B10 | C2  | C3  | B1  | -38.62(11)  |
| B1 | C14 | C19 | C18 | 176.36(14)  | B10 | C2  | C3  | B2  | 2.61(15)    |
| B1 | B2  | B3  | B4  | 141.00(13)  | B10 | C2  | C3  | B7  | 106.84(13)  |
| B1 | B2  | B3  | B5  | 104.15(13)  | B10 | C2  | C3  | B8  | 69.18(14)   |
| B1 | B2  | B3  | B10 | 39.36(11)   | B10 | C2  | B1  | C3  | 138.31(12)  |
| B1 | B2  | B4  | B3  | -35.43(12)  | B10 | C2  | B1  | C14 | -109.47(17) |
| B1 | B2  | B4  | B5  | 1.18(17)    | B10 | C2  | B1  | B2  | 101.42(12)  |
| B1 | B2  | B4  | B8  | 102.54(14)  | B10 | C2  | B1  | B3  | 41.02(11)   |
| B1 | B2  | B4  | B9  | 65.13(16)   | B10 | C2  | B6  | B5  | -40.25(12)  |
| B1 | B2  | B8  | C3  | 33.94(12)   | B10 | C2  | B6  | B7  | -141.55(13) |
| B1 | B2  | B8  | B4  | -101.74(14) | B10 | C2  | B6  | B9  | -103.57(14) |
| B1 | B2  | B8  | B7  | -1.35(17)   | B10 | C2  | B7  | C3  | -100.49(13) |
| B1 | B2  | B8  | B9  | -64.26(16)  | B10 | C2  | B7  | B6  | 37.14(12)   |
| B1 | B3  | B4  | B2  | 35.94(12)   | B10 | C2  | B7  | B8  | -64.60(16)  |
| B1 | B3  | B4  | B5  | -102.91(14) | B10 | C2  | B7  | B9  | -1.41(17)   |
| B1 | B3  | B4  | B8  | -1.54(17)   | B10 | C21 | C22 | C23 | 174.77(16)  |
| B1 | B3  | B4  | B9  | -64.95(16)  | B10 | C21 | C26 | C25 | -174.89(15) |
| B1 | B3  | B5  | B4  | 102.09(14)  | B10 | B1  | B2  | C3  | 95.66(12)   |
| B1 | B3  | B5  | B6  | 0.99(18)    | B10 | B1  | B2  | B3  | -37.58(11)  |
| B1 | B3  | B5  | B9  | 64.42(16)   | B10 | B1  | B2  | B4  | -1.99(16)   |

|    |    |     |     |             |     |    |    |    |             |
|----|----|-----|-----|-------------|-----|----|----|----|-------------|
| B1 | B3 | B5  | B10 | -37.28(12)  | B10 | B1 | B2 | B8 | 62.13(15)   |
| B1 | B3 | B10 | C2  | 42.42(11)   | B10 | B1 | B3 | B2 | 137.09(13)  |
| B1 | B3 | B10 | C21 | -109.83(17) | B10 | B1 | B3 | B4 | 101.51(14)  |
| B1 | B3 | B10 | B5  | 139.89(13)  | B10 | B1 | B3 | B5 | 37.05(12)   |
| B1 | B3 | B10 | B6  | 102.75(13)  | B10 | B3 | B4 | B2 | 101.76(13)  |
| B2 | C3 | C4  | C5  | -6.2(2)     | B10 | B3 | B4 | B5 | -37.09(12)  |
| B2 | C3 | C4  | C9  | 171.62(14)  | B10 | B3 | B4 | B8 | 64.28(16)   |
| B2 | C3 | B1  | C2  | -135.78(12) | B10 | B3 | B4 | B9 | 0.87(17)    |
| B2 | C3 | B1  | C14 | 106.62(16)  | B10 | B3 | B5 | B4 | 139.37(13)  |
| B2 | C3 | B1  | B3  | -39.72(11)  | B10 | B3 | B5 | B6 | 38.27(12)   |
| B2 | C3 | B1  | B10 | -100.78(12) | B10 | B3 | B5 | B9 | 101.70(14)  |
| B2 | C3 | B7  | C2  | 101.53(13)  | B10 | B5 | B6 | C2 | 39.48(12)   |
| B2 | C3 | B7  | B6  | 64.70(16)   | B10 | B5 | B6 | B7 | 101.43(13)  |
| B2 | C3 | B7  | B8  | -37.43(13)  | B10 | B5 | B6 | B9 | 139.02(13)  |
| B2 | C3 | B7  | B9  | 1.53(17)    | B10 | B5 | B9 | B4 | 101.50(14)  |
| B2 | C3 | B8  | B4  | 38.95(12)   | B10 | B5 | B9 | B6 | -36.99(12)  |
| B2 | C3 | B8  | B7  | 140.43(14)  | B10 | B5 | B9 | B7 | 0.74(17)    |
| B2 | C3 | B8  | B9  | 101.78(14)  | B10 | B5 | B9 | B8 | 64.12(16)   |
| B2 | B1 | B3  | B4  | -35.58(12)  | B10 | B6 | B7 | C2 | -34.24(11)  |
| B2 | B1 | B3  | B5  | -100.04(14) | B10 | B6 | B7 | C3 | 2.75(16)    |
| B2 | B1 | B3  | B10 | -137.09(13) | B10 | B6 | B7 | B8 | 64.54(15)   |
| B2 | B1 | B10 | C2  | -94.31(12)  | B10 | B6 | B7 | B9 | 102.39(14)  |
| B2 | B1 | B10 | C21 | 152.46(14)  | B10 | B6 | B9 | B4 | 0.61(17)    |
| B2 | B1 | B10 | B3  | 37.39(11)   | B10 | B6 | B9 | B5 | 37.42(12)   |
| B2 | B1 | B10 | B5  | 2.01(15)    | B10 | B6 | B9 | B7 | -100.17(14) |
| B2 | B1 | B10 | B6  | -60.20(15)  | B10 | B6 | B9 | B8 | -62.43(17)  |
| B2 | B3 | B4  | B5  | -138.85(13) |     |    |    |    |             |

**Hydrogen Atom Coordinates ( $\text{\AA}\times 10^4$ ) and Isotropic Displacement Parameters ( $\text{\AA}^2\times 10^3$ ) for mo\_0804\_CG\_0m.**

| Atom | x        | y        | z       | U(eq) |
|------|----------|----------|---------|-------|
| H5   | -764.46  | 5120.91  | 1411.28 | 25    |
| H6   | -2215.72 | 5829.67  | 2028.76 | 30    |
| H7   | -1835.23 | 6899.87  | 4106.31 | 31    |
| H8   | -10.94   | 7221.46  | 5567.42 | 30    |
| H9   | 1419.39  | 6473.6   | 4962.05 | 25    |
| H10A | 4386.4   | 9838.66  | 6198.06 | 28    |
| H10B | 5602.21  | 9826.4   | 7029.24 | 28    |
| H11A | 4278.33  | 10197.27 | 8157.97 | 31    |
| H11B | 2984.05  | 8801.03  | 7131.38 | 31    |
| H12A | 5404.12  | 7523.65  | 6701.47 | 27    |
| H12B | 4050.44  | 6164.25  | 5705.42 | 27    |
| H13A | 2820.89  | 6668.41  | 6879.85 | 32    |
| H13B | 4019.19  | 6639.07  | 7712.37 | 32    |

|      |          |          |          |    |
|------|----------|----------|----------|----|
| H15  | 1397.47  | 7899.74  | 2604.67  | 21 |
| H16  | 1307.45  | 9401.77  | 1806.2   | 24 |
| H18  | 3235.9   | 8370.21  | -361.06  | 25 |
| H19  | 3297.79  | 6838.85  | 410.48   | 22 |
| H20A | 2562.72  | 9955.9   | -528.63  | 41 |
| H20B | 2798.07  | 10995.74 | 798.57   | 41 |
| H20C | 1311.89  | 9870.3   | -151.51  | 41 |
| H22  | 5992.04  | 8289.4   | 4484.34  | 29 |
| H23  | 8119.43  | 9807.85  | 4690.8   | 32 |
| H25  | 7253.14  | 7705.08  | 1086.23  | 30 |
| H26  | 5125.02  | 6196.74  | 879.39   | 27 |
| H27A | 9335.73  | 10302.57 | 2561.26  | 56 |
| H27B | 9741.6   | 9233.81  | 2785.75  | 56 |
| H27C | 9864.68  | 10460.57 | 3920.25  | 56 |
| H2   | 150(20)  | 4120(20) | 496(18)  | 24 |
| H3   | 2720(20) | 4680(20) | 164(18)  | 24 |
| H4   | 1120(20) | 2130(20) | 331(19)  | 28 |
| H5A  | 4190(20) | 3810(20) | 1639(18) | 27 |
| H6A  | 4610(20) | 5490(20) | 4253(18) | 25 |
| H7A  | 2000(20) | 4870(20) | 4503(19) | 26 |
| H8A  | -110(20) | 2870(20) | 2200(18) | 26 |
| H9A  | 2330(20) | 2600(20) | 2921(19) | 29 |

## Experimental

Single crystals of  $C_{27}H_{35}B_{10}NO_2$  [mo\_0804\_CG\_0m] were recrystallised from a mixture of chloroform and hexane by slow evaporation. A suitable crystal was selected and the crystal was mounted on a MITIGEN holder oil on a Bruker D8 Venture Source diffractometer. The crystal was kept at 100.03 K during data collection. Using Olex2<sup>[2]</sup>, the structure was solved with the XT<sup>[3]</sup> structure solution program using Intrinsic Phasing and refined with the XL<sup>[4]</sup> refinement package using Least Squares minimisation.

## Crystal structure determination of 3ea

**Crystal Data** for  $C_{27}H_{35}B_{10}NO_2$  ( $M = 513.66$  g/mol): triclinic, space group P-1 (no. 2),  $a = 11.7623(18)$  Å,  $b = 11.821(2)$  Å,  $c = 12.371(2)$  Å,  $\alpha = 108.419(5)^\circ$ ,  $\beta = 100.884(5)^\circ$ ,  $\gamma = 113.869(6)^\circ$ ,  $V = 1389.5(4)$  Å<sup>3</sup>,  $Z = 2$ ,  $T = 100.0$  K,  $\mu(\text{MoK}\alpha) = 0.070$  mm<sup>-1</sup>,  $D_{\text{calc}} = 1.228$  g/cm<sup>3</sup>, 29979 reflections measured ( $4.068^\circ \leq 2\theta \leq 57.416^\circ$ ), 7064 unique ( $R_{\text{int}} = 0.0456$ ,  $R_{\text{sigma}} = 0.0388$ ) which were used in all calculations. The final  $R_1$  was 0.0538 ( $I > 2\sigma(I)$ ) and  $wR_2$  was 0.1431 (all data).



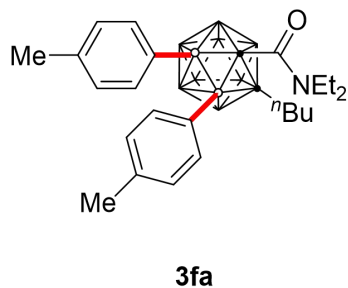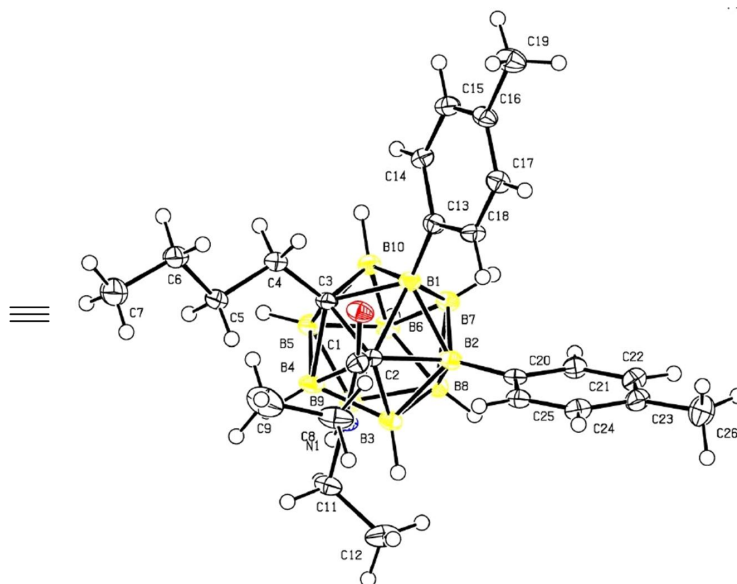

**CCDC 1983615**

### Crystal data and structure refinement for 3fa.

|                                      |                                                           |
|--------------------------------------|-----------------------------------------------------------|
| Identification code                  | mo_0848_CG_0m_4                                           |
| CCDC number                          | 1983615                                                   |
| Empirical formula                    | C <sub>25</sub> H <sub>41</sub> B <sub>10</sub> NO        |
| Formula weight                       | 479.69                                                    |
| Temperature/K                        | 100.0                                                     |
| Crystal system                       | monoclinic                                                |
| Space group                          | P2 <sub>1</sub> /c                                        |
| a/Å                                  | 12.2842(10)                                               |
| b/Å                                  | 12.2978(10)                                               |
| c/Å                                  | 19.8427(15)                                               |
| α/°                                  | 90                                                        |
| β/°                                  | 106.783(2)                                                |
| γ/°                                  | 90                                                        |
| Volume/Å <sup>3</sup>                | 2869.9(4)                                                 |
| Z                                    | 4                                                         |
| ρ <sub>calc</sub> /g/cm <sup>3</sup> | 1.110                                                     |
| μ/mm <sup>-1</sup>                   | 0.060                                                     |
| F(000)                               | 1024.0                                                    |
| Crystal size/mm <sup>3</sup>         | 0.188 × 0.185 × 0.142                                     |
| Radiation                            | MoKα (λ = 0.71073)                                        |
| 2θ range for data collection/°       | 3.946 to 52.818                                           |
| Index ranges                         | -15 ≤ h ≤ 14, 0 ≤ k ≤ 15, 0 ≤ l ≤ 24                      |
| Reflections collected                | 11362                                                     |
| Independent reflections              | 11362 [R <sub>int</sub> = ?, R <sub>sigma</sub> = 0.0660] |
| Data/restraints/parameters           | 11362/0/343                                               |
| Goodness-of-fit on F <sup>2</sup>    | 1.138                                                     |
| Final R indexes [I ≥ 2σ (I)]         | R <sub>1</sub> = 0.0861, wR <sub>2</sub> = 0.1800         |
| Final R indexes [all data]           | R <sub>1</sub> = 0.1194, wR <sub>2</sub> = 0.1966         |

Largest diff. peak/hole / e Å<sup>-3</sup>

0.31/-0.34

**Fractional Atomic Coordinates ( $\times 10^4$ ) and Equivalent Isotropic Displacement Parameters ( $\text{\AA}^2 \times 10^3$ ) for mo\_0848\_CG\_0m\_4.  $U_{\text{eq}}$  is defined as 1/3 of the trace of the orthogonalised  $U_{\text{H}}$  tensor.**

| Atom | x       | y        | z          | U(eq)    |
|------|---------|----------|------------|----------|
| O1   | 3691(2) | 8136(2)  | 6392.6(15) | 23.9(7)  |
| N1   | 2207(3) | 8638(3)  | 6767.4(19) | 21.9(8)  |
| C1   | 2842(4) | 7885(3)  | 6559(2)    | 20.3(9)  |
| C2   | 2560(3) | 6655(3)  | 6536(2)    | 17.3(8)  |
| C3   | 2503(3) | 6074(3)  | 5764(2)    | 18.9(9)  |
| C4   | 2701(3) | 6766(3)  | 5167(2)    | 22.3(9)  |
| C5   | 1797(4) | 7618(3)  | 4835(2)    | 23.8(10) |
| C6   | 2183(4) | 8349(4)  | 4330(2)    | 31.2(11) |
| C7   | 1272(5) | 9169(4)  | 3959(3)    | 42.3(13) |
| C8   | 2642(4) | 9770(3)  | 6800(3)    | 31.2(11) |
| C9   | 2209(5) | 10343(4) | 6092(3)    | 44.5(14) |
| C11  | 1075(4) | 8562(3)  | 6874(2)    | 25.7(10) |
| C12  | 1114(4) | 8654(4)  | 7650(2)    | 34.7(12) |
| C13  | 4964(3) | 6115(3)  | 6512(2)    | 19.5(9)  |
| C14  | 5509(4) | 5635(3)  | 6055(2)    | 20.2(9)  |
| C15  | 6640(4) | 5845(3)  | 6107(2)    | 22.9(9)  |
| C16  | 7281(3) | 6547(3)  | 6613(2)    | 22.9(9)  |
| C17  | 6759(4) | 7013(3)  | 7081(2)    | 22.0(9)  |
| C18  | 5633(4) | 6803(3)  | 7027(2)    | 21.7(9)  |
| C19  | 8505(4) | 6814(4)  | 6660(3)    | 33.4(11) |
| C20  | 3873(3) | 6080(3)  | 7985(2)    | 18.0(9)  |
| C21  | 4396(4) | 5250(3)  | 8445(2)    | 21.1(9)  |
| C22  | 5090(4) | 5467(4)  | 9118(2)    | 25.7(10) |
| C23  | 5315(4) | 6529(3)  | 9363(2)    | 25.0(10) |
| C24  | 4789(4) | 7360(3)  | 8911(2)    | 23.5(9)  |
| C25  | 4086(3) | 7148(3)  | 8240(2)    | 21.4(9)  |
| C26  | 6094(4) | 6770(4)  | 10085(2)   | 34.6(11) |
| B1   | 3712(4) | 5784(4)  | 6479(2)    | 17.7(9)  |
| B2   | 3138(4) | 5756(4)  | 7226(2)    | 18.1(10) |
| B3   | 1645(4) | 6012(4)  | 6915(2)    | 19.3(10) |
| B4   | 1246(4) | 6257(4)  | 5995(3)    | 20.9(10) |
| B5   | 1513(4) | 5057(4)  | 5580(3)    | 21.0(10) |
| B6   | 2034(4) | 4052(4)  | 6242(3)    | 22.8(11) |
| B7   | 3366(4) | 4528(4)  | 6795(2)    | 18.6(10) |
| B8   | 2118(4) | 4665(4)  | 7067(3)    | 19.5(10) |
| B9   | 958(4)  | 4983(4)  | 6313(2)    | 20.7(10) |
| B10  | 2976(4) | 4769(4)  | 5880(2)    | 19.6(10) |

**Anisotropic Displacement Parameters ( $\text{\AA}^2 \times 10^3$ ) for mo\_0848\_CG\_0m\_4. The Anisotropic displacement factor exponent takes the form:  $-2\pi^2[h^2a^{*2}U_{11}+2hka^*b^*U_{12}+\dots]$ .**

| Atom | $U_{11}$ | $U_{22}$ | $U_{33}$ | $U_{23}$ | $U_{13}$ | $U_{12}$ |
|------|----------|----------|----------|----------|----------|----------|
| O1   | 21.3(16) | 19.3(15) | 34.1(18) | 1.2(13)  | 12.7(14) | -0.2(12) |
| N1   | 19.4(18) | 16.8(18) | 33(2)    | -1.5(15) | 12.8(16) | 0.6(14)  |
| C1   | 21(2)    | 20(2)    | 21(2)    | -0.4(17) | 7.1(17)  | -1.9(17) |
| C2   | 16(2)    | 20(2)    | 18(2)    | -0.7(17) | 7.2(16)  | 1.6(16)  |
| C3   | 15(2)    | 24(2)    | 20(2)    | -1.4(17) | 7.8(17)  | 1.3(16)  |
| C4   | 20(2)    | 26(2)    | 23(2)    | 0.2(18)  | 9.7(18)  | 3.5(18)  |
| C5   | 19(2)    | 29(2)    | 25(2)    | 3.9(19)  | 9.3(18)  | 4.7(18)  |
| C6   | 30(3)    | 38(3)    | 30(3)    | 10(2)    | 16(2)    | 11(2)    |
| C7   | 42(3)    | 49(3)    | 41(3)    | 19(3)    | 19(3)    | 17(3)    |
| C8   | 33(3)    | 17(2)    | 52(3)    | -5(2)    | 25(2)    | -1.5(19) |
| C9   | 40(3)    | 28(3)    | 71(4)    | 11(3)    | 26(3)    | 4(2)     |
| C11  | 21(2)    | 25(2)    | 35(3)    | 0(2)     | 14(2)    | 4.3(18)  |
| C12  | 37(3)    | 33(3)    | 42(3)    | -12(2)   | 24(2)    | -6(2)    |
| C13  | 20(2)    | 18(2)    | 22(2)    | 3.4(17)  | 8.8(17)  | 1.6(17)  |
| C14  | 23(2)    | 20(2)    | 19(2)    | -1.3(17) | 9.3(17)  | 0.0(17)  |
| C15  | 25(2)    | 23(2)    | 26(2)    | 1.1(19)  | 14.3(19) | 2.2(18)  |
| C16  | 17(2)    | 23(2)    | 30(2)    | 1.8(19)  | 9.9(19)  | -0.6(17) |
| C17  | 20(2)    | 21(2)    | 26(2)    | -3.0(18) | 6.5(18)  | -1.1(18) |
| C18  | 21(2)    | 23(2)    | 24(2)    | -4.5(18) | 11.0(18) | 0.6(18)  |
| C19  | 25(3)    | 34(3)    | 44(3)    | 1(2)     | 16(2)    | -2(2)    |
| C20  | 16(2)    | 18(2)    | 22(2)    | -1.5(17) | 10.6(17) | 0.4(16)  |
| C21  | 23(2)    | 19(2)    | 23(2)    | -2.9(17) | 8.5(18)  | -1.4(17) |
| C22  | 28(2)    | 29(2)    | 23(2)    | 0.9(19)  | 10.4(19) | 0.5(19)  |
| C23  | 23(2)    | 32(2)    | 22(2)    | -3.7(19) | 8.6(18)  | -4.8(19) |
| C24  | 24(2)    | 23(2)    | 26(2)    | -5.9(19) | 10.8(19) | -5.4(18) |
| C25  | 20(2)    | 22(2)    | 26(2)    | -0.1(18) | 12.0(18) | 1.6(17)  |
| C26  | 38(3)    | 35(3)    | 27(3)    | -4(2)    | 4(2)     | -5(2)    |
| B1   | 18(2)    | 18(2)    | 19(2)    | -2.6(19) | 6.9(19)  | 2.3(19)  |
| B2   | 16(2)    | 18(2)    | 23(2)    | -0.1(19) | 8.7(19)  | -0.6(18) |
| B3   | 14(2)    | 22(2)    | 24(2)    | -1(2)    | 7.3(19)  | -2.3(18) |
| B4   | 13(2)    | 26(3)    | 26(3)    | -4(2)    | 9.5(19)  | -2.2(19) |
| B5   | 19(2)    | 23(3)    | 21(2)    | -6(2)    | 6(2)     | -3(2)    |
| B6   | 21(3)    | 22(3)    | 26(3)    | -2(2)    | 7(2)     | 0(2)     |
| B7   | 18(2)    | 16(2)    | 23(2)    | -1.4(19) | 7.7(19)  | -0.5(18) |
| B8   | 17(2)    | 17(2)    | 25(3)    | 0(2)     | 6(2)     | -2.0(19) |
| B9   | 17(2)    | 20(2)    | 26(3)    | 1(2)     | 8(2)     | -1.2(19) |
| B10  | 19(2)    | 21(2)    | 20(2)    | -3(2)    | 7.0(19)  | -0.3(19) |

**Bond Lengths for mo\_0848\_CG\_0m\_4.**

| Atom | Atom | Length/Å | Atom | Atom | Length/Å |
|------|------|----------|------|------|----------|
| O1   | C1   | 1.221(4) | C20  | C25  | 1.405(5) |
| N1   | C1   | 1.349(5) | C20  | B2   | 1.568(6) |
| N1   | C8   | 1.486(5) | C21  | C22  | 1.387(6) |
| N1   | C11  | 1.470(5) | C22  | C23  | 1.393(6) |
| C1   | C2   | 1.550(5) | C23  | C24  | 1.390(6) |
| C2   | C3   | 1.673(5) | C23  | C26  | 1.505(6) |
| C2   | B1   | 1.804(6) | C24  | C25  | 1.386(6) |
| C2   | B2   | 1.742(6) | B1   | B2   | 1.815(6) |
| C2   | B3   | 1.715(6) | B1   | B7   | 1.764(6) |
| C2   | B4   | 1.731(6) | B1   | B10  | 1.781(6) |
| C3   | C4   | 1.535(5) | B2   | B3   | 1.786(7) |
| C3   | B1   | 1.769(6) | B2   | B7   | 1.796(6) |
| C3   | B4   | 1.747(6) | B2   | B8   | 1.801(6) |
| C3   | B5   | 1.708(6) | B3   | B4   | 1.774(7) |
| C3   | B10  | 1.699(6) | B3   | B8   | 1.753(6) |
| C4   | C5   | 1.530(5) | B3   | B9   | 1.778(7) |
| C5   | C6   | 1.521(5) | B4   | B5   | 1.767(6) |
| C6   | C7   | 1.529(6) | B4   | B9   | 1.762(7) |
| C8   | C9   | 1.524(7) | B5   | B6   | 1.783(7) |
| C11  | C12  | 1.532(6) | B5   | B9   | 1.778(6) |
| C13  | C14  | 1.404(5) | B5   | B10  | 1.758(7) |
| C13  | C18  | 1.398(6) | B6   | B7   | 1.785(7) |
| C13  | B1   | 1.574(6) | B6   | B8   | 1.779(6) |
| C14  | C15  | 1.386(6) | B6   | B9   | 1.785(7) |
| C15  | C16  | 1.384(6) | B6   | B10  | 1.764(6) |
| C16  | C17  | 1.394(5) | B7   | B8   | 1.774(6) |
| C16  | C19  | 1.516(6) | B7   | B10  | 1.765(6) |
| C17  | C18  | 1.380(6) | B8   | B9   | 1.788(7) |
| C20  | C21  | 1.397(5) |      |      |          |

**Bond Angles for mo\_0848\_CG\_0m\_4.**

| Atom | Atom | Atom | Angle/°  | Atom | Atom | Atom | Angle/°  |
|------|------|------|----------|------|------|------|----------|
| C1   | N1   | C8   | 115.1(3) | B3   | B2   | B7   | 105.6(3) |
| C1   | N1   | C11  | 130.9(3) | B3   | B2   | B8   | 58.5(2)  |
| C11  | N1   | C8   | 113.4(3) | B7   | B2   | B1   | 58.5(2)  |
| O1   | C1   | N1   | 121.6(4) | B7   | B2   | B8   | 59.1(2)  |
| O1   | C1   | C2   | 116.1(3) | B8   | B2   | B1   | 106.6(3) |
| N1   | C1   | C2   | 122.3(3) | C2   | B3   | B2   | 59.6(2)  |
| C1   | C2   | C3   | 113.2(3) | C2   | B3   | B4   | 59.5(2)  |
| C1   | C2   | B1   | 114.1(3) | C2   | B3   | B8   | 106.5(3) |
| C1   | C2   | B2   | 124.0(3) | C2   | B3   | B9   | 106.1(3) |

|     |     |     |          |     |    |     |          |
|-----|-----|-----|----------|-----|----|-----|----------|
| C1  | C2  | B3  | 127.3(3) | B4  | B3 | B2  | 109.6(3) |
| C1  | C2  | B4  | 117.0(3) | B4  | B3 | B9  | 59.5(3)  |
| C3  | C2  | B1  | 61.0(2)  | B8  | B3 | B2  | 61.2(3)  |
| C3  | C2  | B2  | 110.4(3) | B8  | B3 | B4  | 108.5(3) |
| C3  | C2  | B3  | 110.2(3) | B8  | B3 | B9  | 60.8(3)  |
| C3  | C2  | B4  | 61.7(2)  | B9  | B3 | B2  | 110.3(3) |
| B2  | C2  | B1  | 61.6(2)  | C2  | B4 | C3  | 57.5(2)  |
| B3  | C2  | B1  | 112.3(3) | C2  | B4 | B3  | 58.6(2)  |
| B3  | C2  | B2  | 62.2(2)  | C2  | B4 | B5  | 105.1(3) |
| B3  | C2  | B4  | 62.0(3)  | C2  | B4 | B9  | 106.1(3) |
| B4  | C2  | B1  | 113.7(3) | C3  | B4 | B3  | 104.2(3) |
| B4  | C2  | B2  | 113.8(3) | C3  | B4 | B5  | 58.2(2)  |
| C2  | C3  | B1  | 63.1(2)  | C3  | B4 | B9  | 105.2(3) |
| C2  | C3  | B4  | 60.8(2)  | B5  | B4 | B3  | 107.8(3) |
| C2  | C3  | B5  | 110.4(3) | B9  | B4 | B3  | 60.4(3)  |
| C2  | C3  | B10 | 111.0(3) | B9  | B4 | B5  | 60.5(3)  |
| C4  | C3  | C2  | 119.8(3) | C3  | B5 | B4  | 60.3(2)  |
| C4  | C3  | B1  | 116.6(3) | C3  | B5 | B6  | 105.5(3) |
| C4  | C3  | B4  | 118.7(3) | C3  | B5 | B9  | 106.2(3) |
| C4  | C3  | B5  | 120.1(3) | C3  | B5 | B10 | 58.7(2)  |
| C4  | C3  | B10 | 120.2(3) | B4  | B5 | B6  | 108.1(3) |
| B4  | C3  | B1  | 114.6(3) | B4  | B5 | B9  | 59.6(2)  |
| B5  | C3  | B1  | 113.9(3) | B9  | B5 | B6  | 60.2(3)  |
| B5  | C3  | B4  | 61.5(3)  | B10 | B5 | B4  | 108.6(3) |
| B10 | C3  | B1  | 61.7(3)  | B10 | B5 | B6  | 59.8(3)  |
| B10 | C3  | B4  | 112.4(3) | B10 | B5 | B9  | 108.0(3) |
| B10 | C3  | B5  | 62.1(3)  | B5  | B6 | B7  | 107.2(3) |
| C5  | C4  | C3  | 117.0(3) | B5  | B6 | B9  | 59.8(3)  |
| C6  | C5  | C4  | 111.2(3) | B7  | B6 | B9  | 108.0(3) |
| C5  | C6  | C7  | 112.5(4) | B8  | B6 | B5  | 107.3(3) |
| N1  | C8  | C9  | 111.6(4) | B8  | B6 | B7  | 59.7(3)  |
| N1  | C11 | C12 | 112.6(4) | B8  | B6 | B9  | 60.2(3)  |
| C14 | C13 | B1  | 120.5(4) | B10 | B6 | B5  | 59.4(3)  |
| C18 | C13 | C14 | 116.0(4) | B10 | B6 | B7  | 59.6(3)  |
| C18 | C13 | B1  | 123.2(3) | B10 | B6 | B8  | 107.0(3) |
| C15 | C14 | C13 | 121.9(4) | B10 | B6 | B9  | 107.4(3) |
| C16 | C15 | C14 | 121.2(4) | B1  | B7 | B2  | 61.3(2)  |
| C15 | C16 | C17 | 117.7(4) | B1  | B7 | B6  | 109.9(3) |
| C15 | C16 | C19 | 121.7(4) | B1  | B7 | B8  | 110.1(3) |
| C17 | C16 | C19 | 120.6(4) | B1  | B7 | B10 | 60.6(3)  |
| C18 | C17 | C16 | 121.0(4) | B6  | B7 | B2  | 109.1(3) |
| C17 | C18 | C13 | 122.3(4) | B8  | B7 | B2  | 60.6(2)  |
| C21 | C20 | C25 | 116.5(4) | B8  | B7 | B6  | 60.0(3)  |
| C21 | C20 | B2  | 118.1(3) | B10 | B7 | B2  | 108.4(3) |
| C25 | C20 | B2  | 125.4(4) | B10 | B7 | B6  | 59.6(3)  |

|     |     |     |          |     |     |    |          |
|-----|-----|-----|----------|-----|-----|----|----------|
| C22 | C21 | C20 | 121.8(4) | B10 | B7  | B8 | 107.2(3) |
| C21 | C22 | C23 | 121.4(4) | B3  | B8  | B2 | 60.3(3)  |
| C22 | C23 | C26 | 121.6(4) | B3  | B8  | B6 | 108.3(3) |
| C24 | C23 | C22 | 117.1(4) | B3  | B8  | B7 | 108.0(3) |
| C24 | C23 | C26 | 121.3(4) | B3  | B8  | B9 | 60.3(3)  |
| C25 | C24 | C23 | 121.8(4) | B6  | B8  | B2 | 109.2(3) |
| C24 | C25 | C20 | 121.4(4) | B6  | B8  | B9 | 60.1(3)  |
| C2  | B1  | B2  | 57.5(2)  | B7  | B8  | B2 | 60.3(2)  |
| C3  | B1  | C2  | 55.8(2)  | B7  | B8  | B6 | 60.3(3)  |
| C3  | B1  | B2  | 102.9(3) | B7  | B8  | B9 | 108.4(3) |
| C3  | B1  | B10 | 57.2(2)  | B9  | B8  | B2 | 109.2(3) |
| C13 | B1  | C2  | 128.2(3) | B3  | B9  | B5 | 107.1(3) |
| C13 | B1  | C3  | 124.4(3) | B3  | B9  | B6 | 106.9(3) |
| C13 | B1  | B2  | 125.2(4) | B3  | B9  | B8 | 58.9(3)  |
| C13 | B1  | B7  | 123.0(3) | B4  | B9  | B3 | 60.1(3)  |
| C13 | B1  | B10 | 120.7(3) | B4  | B9  | B5 | 59.9(3)  |
| B7  | B1  | C2  | 102.9(3) | B4  | B9  | B6 | 108.2(3) |
| B7  | B1  | C3  | 103.2(3) | B4  | B9  | B8 | 107.5(3) |
| B7  | B1  | B2  | 60.2(2)  | B5  | B9  | B6 | 60.1(3)  |
| B7  | B1  | B10 | 59.7(3)  | B5  | B9  | B8 | 107.2(3) |
| B10 | B1  | C2  | 101.6(3) | B6  | B9  | B8 | 59.7(3)  |
| B10 | B1  | B2  | 106.9(3) | C3  | B10 | B1 | 61.0(2)  |
| C2  | B2  | B1  | 60.9(2)  | C3  | B10 | B5 | 59.2(3)  |
| C2  | B2  | B3  | 58.2(2)  | C3  | B10 | B6 | 106.7(3) |
| C2  | B2  | B7  | 104.1(3) | C3  | B10 | B7 | 106.1(3) |
| C2  | B2  | B8  | 103.3(3) | B5  | B10 | B1 | 110.9(3) |
| C20 | B2  | C2  | 125.8(3) | B5  | B10 | B6 | 60.8(3)  |
| C20 | B2  | B1  | 121.9(3) | B5  | B10 | B7 | 109.2(3) |
| C20 | B2  | B3  | 122.4(3) | B6  | B10 | B1 | 110.1(3) |
| C20 | B2  | B7  | 123.0(4) | B6  | B10 | B7 | 60.8(3)  |
| C20 | B2  | B8  | 122.4(3) | B7  | B10 | B1 | 59.7(3)  |
| B3  | B2  | B1  | 108.5(3) |     |     |    |          |

**Torsion Angles for mo\_0848\_CG\_0m\_4.**

| A  | B  | C  | D  | Angle/°   | A  | B   | C   | D   | Angle/°   |
|----|----|----|----|-----------|----|-----|-----|-----|-----------|
| O1 | C1 | C2 | C3 | -52.8(5)  | B2 | C2  | B4  | C3  | -101.2(3) |
| O1 | C1 | C2 | B1 | 14.5(5)   | B2 | C2  | B4  | B3  | 35.7(3)   |
| O1 | C1 | C2 | B2 | 85.4(5)   | B2 | C2  | B4  | B5  | -66.2(4)  |
| O1 | C1 | C2 | B3 | 164.3(4)  | B2 | C2  | B4  | B9  | -3.1(4)   |
| O1 | C1 | C2 | B4 | -121.7(4) | B2 | C20 | C21 | C22 | 177.9(4)  |
| N1 | C1 | C2 | C3 | 128.9(4)  | B2 | C20 | C25 | C24 | -177.1(4) |
| N1 | C1 | C2 | B1 | -163.8(4) | B2 | B1  | B7  | B6  | 101.5(3)  |
| N1 | C1 | C2 | B2 | -92.9(5)  | B2 | B1  | B7  | B8  | 37.2(3)   |

|    |    |     |     |           |    |    |     |     |           |
|----|----|-----|-----|-----------|----|----|-----|-----|-----------|
| N1 | C1 | C2  | B3  | -14.0(6)  | B2 | B1 | B7  | B10 | 136.1(3)  |
| N1 | C1 | C2  | B4  | 60.0(5)   | B2 | B1 | B10 | C3  | 94.8(3)   |
| C1 | N1 | C8  | C9  | 87.1(5)   | B2 | B1 | B10 | B5  | 61.7(4)   |
| C1 | N1 | C11 | C12 | 111.3(5)  | B2 | B1 | B10 | B6  | -3.7(4)   |
| C1 | C2 | C3  | C4  | -1.0(5)   | B2 | B1 | B10 | B7  | -38.9(3)  |
| C1 | C2 | C3  | B1  | 105.8(3)  | B2 | B3 | B4  | C2  | -33.5(3)  |
| C1 | C2 | C3  | B4  | -109.3(4) | B2 | B3 | B4  | C3  | 2.9(4)    |
| C1 | C2 | C3  | B5  | -147.0(3) | B2 | B3 | B4  | B5  | 63.6(4)   |
| C1 | C2 | C3  | B10 | 146.1(3)  | B2 | B3 | B4  | B9  | 102.6(4)  |
| C1 | C2 | B1  | C3  | -104.1(3) | B2 | B3 | B8  | B6  | -102.1(3) |
| C1 | C2 | B1  | C13 | 5.4(6)    | B2 | B3 | B8  | B7  | -38.3(3)  |
| C1 | C2 | B1  | B2  | 117.1(4)  | B2 | B3 | B8  | B9  | -139.6(3) |
| C1 | C2 | B1  | B7  | 158.5(3)  | B2 | B3 | B9  | B4  | -101.4(3) |
| C1 | C2 | B1  | B10 | -140.2(3) | B2 | B3 | B9  | B5  | -62.8(4)  |
| C1 | C2 | B2  | C20 | 8.8(6)    | B2 | B3 | B9  | B6  | 0.3(4)    |
| C1 | C2 | B2  | B1  | -101.3(4) | B2 | B3 | B9  | B8  | 37.3(3)   |
| C1 | C2 | B2  | B3  | 118.1(4)  | B2 | B7 | B8  | B3  | 38.3(3)   |
| C1 | C2 | B2  | B7  | -142.1(3) | B2 | B7 | B8  | B6  | 139.5(3)  |
| C1 | C2 | B2  | B8  | 156.9(3)  | B2 | B7 | B8  | B9  | 102.1(3)  |
| C1 | C2 | B3  | B2  | -113.2(4) | B2 | B7 | B10 | C3  | -1.4(4)   |
| C1 | C2 | B3  | B4  | 103.9(4)  | B2 | B7 | B10 | B1  | 39.8(3)   |
| C1 | C2 | B3  | B8  | -154.0(4) | B2 | B7 | B10 | B5  | -63.7(4)  |
| C1 | C2 | B3  | B9  | 142.3(4)  | B2 | B7 | B10 | B6  | -101.9(4) |
| C1 | C2 | B4  | C3  | 103.1(3)  | B2 | B8 | B9  | B3  | -36.6(3)  |
| C1 | C2 | B4  | B3  | -120.0(4) | B2 | B8 | B9  | B4  | 0.3(4)    |
| C1 | C2 | B4  | B5  | 138.1(3)  | B2 | B8 | B9  | B5  | 63.4(4)   |
| C1 | C2 | B4  | B9  | -158.8(3) | B2 | B8 | B9  | B6  | 101.6(3)  |
| C2 | C3 | C4  | C5  | -67.9(5)  | B3 | C2 | C3  | C4  | 148.3(3)  |
| C2 | C3 | B1  | C13 | -116.2(4) | B3 | C2 | C3  | B1  | -105.0(3) |
| C2 | C3 | B1  | B2  | 34.8(3)   | B3 | C2 | C3  | B4  | 40.0(3)   |
| C2 | C3 | B1  | B7  | 96.8(3)   | B3 | C2 | C3  | B5  | 2.3(4)    |
| C2 | C3 | B1  | B10 | 136.7(3)  | B3 | C2 | C3  | B10 | -64.6(4)  |
| C2 | C3 | B4  | B3  | -37.0(3)  | B3 | C2 | B1  | C3  | 101.5(3)  |
| C2 | C3 | B4  | B5  | -139.3(3) | B3 | C2 | B1  | C13 | -148.9(4) |
| C2 | C3 | B4  | B9  | -99.6(3)  | B3 | C2 | B1  | B2  | -37.3(3)  |
| C2 | C3 | B5  | B4  | 37.4(3)   | B3 | C2 | B1  | B7  | 4.1(4)    |
| C2 | C3 | B5  | B6  | -64.9(4)  | B3 | C2 | B1  | B10 | 65.4(4)   |
| C2 | C3 | B5  | B9  | -2.1(4)   | B3 | C2 | B2  | C20 | -109.3(4) |
| C2 | C3 | B5  | B10 | -103.6(3) | B3 | C2 | B2  | B1  | 140.6(3)  |
| C2 | C3 | B10 | B1  | -41.0(3)  | B3 | C2 | B2  | B7  | 99.8(3)   |
| C2 | C3 | B10 | B5  | 102.7(3)  | B3 | C2 | B2  | B8  | 38.8(3)   |
| C2 | C3 | B10 | B6  | 63.2(4)   | B3 | C2 | B4  | C3  | -136.9(3) |
| C2 | C3 | B10 | B7  | -0.4(4)   | B3 | C2 | B4  | B5  | -101.9(3) |
| C2 | B1 | B2  | C20 | -116.2(4) | B3 | C2 | B4  | B9  | -38.8(3)  |
| C2 | B1 | B2  | B3  | 34.6(3)   | B3 | B2 | B7  | B1  | 102.4(3)  |

|    |    |     |     |           |    |    |     |     |           |
|----|----|-----|-----|-----------|----|----|-----|-----|-----------|
| C2 | B1 | B2  | B7  | 132.0(3)  | B3 | B2 | B7  | B6  | -0.4(4)   |
| C2 | B1 | B2  | B8  | 96.3(3)   | B3 | B2 | B7  | B8  | -36.9(3)  |
| C2 | B1 | B7  | B2  | -40.1(3)  | B3 | B2 | B7  | B10 | 62.9(4)   |
| C2 | B1 | B7  | B6  | 61.4(4)   | B3 | B2 | B8  | B6  | 100.6(4)  |
| C2 | B1 | B7  | B8  | -2.9(4)   | B3 | B2 | B8  | B7  | 137.3(3)  |
| C2 | B1 | B7  | B10 | 96.1(3)   | B3 | B2 | B8  | B9  | 36.6(3)   |
| C2 | B1 | B10 | C3  | 35.4(3)   | B3 | B4 | B5  | C3  | -96.0(3)  |
| C2 | B1 | B10 | B5  | 2.4(4)    | B3 | B4 | B5  | B6  | 1.9(4)    |
| C2 | B1 | B10 | B6  | -63.1(4)  | B3 | B4 | B5  | B9  | 39.0(3)   |
| C2 | B1 | B10 | B7  | -98.3(3)  | B3 | B4 | B5  | B10 | -61.4(4)  |
| C2 | B2 | B3  | B4  | 33.5(3)   | B3 | B4 | B9  | B5  | -136.5(3) |
| C2 | B2 | B3  | B8  | 134.3(3)  | B3 | B4 | B9  | B6  | -99.4(4)  |
| C2 | B2 | B3  | B9  | 97.2(3)   | B3 | B4 | B9  | B8  | -36.4(3)  |
| C2 | B2 | B7  | B1  | 42.1(3)   | B3 | B8 | B9  | B4  | 36.9(3)   |
| C2 | B2 | B7  | B6  | -60.7(4)  | B3 | B8 | B9  | B5  | 100.0(3)  |
| C2 | B2 | B7  | B8  | -97.3(3)  | B3 | B8 | B9  | B6  | 138.2(3)  |
| C2 | B2 | B7  | B10 | 2.6(4)    | B4 | C2 | C3  | C4  | 108.3(4)  |
| C2 | B2 | B8  | B3  | -38.7(3)  | B4 | C2 | C3  | B1  | -145.0(3) |
| C2 | B2 | B8  | B6  | 61.9(4)   | B4 | C2 | C3  | B5  | -37.7(3)  |
| C2 | B2 | B8  | B7  | 98.6(3)   | B4 | C2 | C3  | B10 | -104.6(3) |
| C2 | B2 | B8  | B9  | -2.1(4)   | B4 | C2 | B1  | C3  | 33.5(3)   |
| C2 | B3 | B4  | C3  | 36.5(3)   | B4 | C2 | B1  | C13 | 143.1(4)  |
| C2 | B3 | B4  | B5  | 97.1(3)   | B4 | C2 | B1  | B2  | -105.3(3) |
| C2 | B3 | B4  | B9  | 136.1(3)  | B4 | C2 | B1  | B7  | -63.8(4)  |
| C2 | B3 | B8  | B2  | 40.1(3)   | B4 | C2 | B1  | B10 | -2.6(4)   |
| C2 | B3 | B8  | B6  | -62.1(4)  | B4 | C2 | B2  | C20 | -144.8(4) |
| C2 | B3 | B8  | B7  | 1.8(4)    | B4 | C2 | B2  | B1  | 105.1(3)  |
| C2 | B3 | B8  | B9  | -99.5(3)  | B4 | C2 | B2  | B3  | -35.6(3)  |
| C2 | B3 | B9  | B4  | -38.4(3)  | B4 | C2 | B2  | B7  | 64.3(4)   |
| C2 | B3 | B9  | B5  | 0.2(4)    | B4 | C2 | B2  | B8  | 3.2(4)    |
| C2 | B3 | B9  | B6  | 63.3(4)   | B4 | C2 | B3  | B2  | 142.9(3)  |
| C2 | B3 | B9  | B8  | 100.3(3)  | B4 | C2 | B3  | B8  | 102.1(3)  |
| C2 | B4 | B5  | C3  | -34.7(3)  | B4 | C2 | B3  | B9  | 38.4(3)   |
| C2 | B4 | B5  | B6  | 63.2(4)   | B4 | C3 | C4  | C5  | 3.0(5)    |
| C2 | B4 | B5  | B9  | 100.2(3)  | B4 | C3 | B1  | C2  | -33.5(3)  |
| C2 | B4 | B5  | B10 | -0.1(4)   | B4 | C3 | B1  | C13 | -149.7(4) |
| C2 | B4 | B9  | B3  | 38.0(3)   | B4 | C3 | B1  | B2  | 1.3(4)    |
| C2 | B4 | B9  | B5  | -98.5(3)  | B4 | C3 | B1  | B7  | 63.3(4)   |
| C2 | B4 | B9  | B6  | -61.5(4)  | B4 | C3 | B1  | B10 | 103.2(3)  |
| C2 | B4 | B9  | B8  | 1.6(4)    | B4 | C3 | B5  | B6  | -102.3(3) |
| C3 | C2 | B1  | C13 | 109.6(4)  | B4 | C3 | B5  | B9  | -39.5(3)  |
| C3 | C2 | B1  | B2  | -138.8(3) | B4 | C3 | B5  | B10 | -141.0(3) |
| C3 | C2 | B1  | B7  | -97.3(3)  | B4 | C3 | B10 | B1  | -106.9(3) |
| C3 | C2 | B1  | B10 | -36.1(3)  | B4 | C3 | B10 | B5  | 36.7(3)   |
| C3 | C2 | B2  | C20 | 148.0(4)  | B4 | C3 | B10 | B6  | -2.7(4)   |



|    |    |     |     |           |    |    |     |     |           |
|----|----|-----|-----|-----------|----|----|-----|-----|-----------|
| C3 | C2 | B2  | B1  | 37.9(3)   | B4 | C3 | B10 | B7  | -66.4(4)  |
| C3 | C2 | B2  | B3  | -102.7(3) | B4 | B3 | B8  | B2  | 102.7(3)  |
| C3 | C2 | B2  | B7  | -2.9(4)   | B4 | B3 | B8  | B6  | 0.6(4)    |
| C3 | C2 | B2  | B8  | -63.9(4)  | B4 | B3 | B8  | B7  | 64.4(4)   |
| C3 | C2 | B3  | B2  | 103.0(3)  | B4 | B3 | B8  | B9  | -36.9(3)  |
| C3 | C2 | B3  | B4  | -39.9(3)  | B4 | B3 | B9  | B5  | 38.6(3)   |
| C3 | C2 | B3  | B8  | 62.2(4)   | B4 | B3 | B9  | B6  | 101.7(3)  |
| C3 | C2 | B3  | B9  | -1.5(4)   | B4 | B3 | B9  | B8  | 138.7(3)  |
| C3 | C2 | B4  | B3  | 136.9(3)  | B4 | B5 | B6  | B7  | -64.4(4)  |
| C3 | C2 | B4  | B5  | 35.0(3)   | B4 | B5 | B6  | B8  | -1.6(4)   |
| C3 | C2 | B4  | B9  | 98.1(3)   | B4 | B5 | B6  | B9  | 36.8(3)   |
| C3 | C4 | C5  | C6  | 171.7(4)  | B4 | B5 | B6  | B10 | -101.5(3) |
| C3 | B1 | B2  | C2  | -34.0(3)  | B4 | B5 | B9  | B3  | -38.7(3)  |
| C3 | B1 | B2  | C20 | -150.2(4) | B4 | B5 | B9  | B6  | -138.7(4) |
| C3 | B1 | B2  | B3  | 0.6(4)    | B4 | B5 | B9  | B8  | -100.6(4) |
| C3 | B1 | B2  | B7  | 98.0(3)   | B4 | B5 | B10 | C3  | -35.3(3)  |
| C3 | B1 | B2  | B8  | 62.3(4)   | B4 | B5 | B10 | B1  | -1.5(4)   |
| C3 | B1 | B7  | B2  | -97.5(3)  | B4 | B5 | B10 | B6  | 100.5(4)  |
| C3 | B1 | B7  | B6  | 3.9(4)    | B4 | B5 | B10 | B7  | 62.4(4)   |
| C3 | B1 | B7  | B8  | -60.3(4)  | B5 | C3 | C4  | C5  | 74.8(5)   |
| C3 | B1 | B7  | B10 | 38.6(3)   | B5 | C3 | B1  | C2  | -101.7(3) |
| C3 | B1 | B10 | B5  | -33.1(3)  | B5 | C3 | B1  | C13 | 142.1(4)  |
| C3 | B1 | B10 | B6  | -98.5(3)  | B5 | C3 | B1  | B2  | -66.9(4)  |
| C3 | B1 | B10 | B7  | -133.7(3) | B5 | C3 | B1  | B7  | -4.9(4)   |
| C3 | B4 | B5  | B6  | 97.9(3)   | B5 | C3 | B1  | B10 | 35.0(3)   |
| C3 | B4 | B5  | B9  | 135.0(3)  | B5 | C3 | B4  | C2  | 139.3(3)  |
| C3 | B4 | B5  | B10 | 34.6(3)   | B5 | C3 | B4  | B3  | 102.3(3)  |
| C3 | B4 | B9  | B3  | 97.9(3)   | B5 | C3 | B4  | B9  | 39.7(3)   |
| C3 | B4 | B9  | B5  | -38.5(3)  | B5 | C3 | B10 | B1  | -143.6(3) |
| C3 | B4 | B9  | B6  | -1.5(4)   | B5 | C3 | B10 | B6  | -39.5(3)  |
| C3 | B4 | B9  | B8  | 61.5(4)   | B5 | C3 | B10 | B7  | -103.1(3) |
| C3 | B5 | B6  | B7  | -1.1(4)   | B5 | B4 | B9  | B3  | 136.5(3)  |
| C3 | B5 | B6  | B8  | 61.7(4)   | B5 | B4 | B9  | B6  | 37.0(3)   |
| C3 | B5 | B6  | B9  | 100.1(3)  | B5 | B4 | B9  | B8  | 100.1(3)  |
| C3 | B5 | B6  | B10 | -38.2(3)  | B5 | B6 | B7  | B1  | -1.9(4)   |
| C3 | B5 | B9  | B3  | 1.1(4)    | B5 | B6 | B7  | B2  | 63.6(4)   |
| C3 | B5 | B9  | B4  | 39.8(3)   | B5 | B6 | B7  | B8  | 100.4(3)  |
| C3 | B5 | B9  | B6  | -98.9(3)  | B5 | B6 | B7  | B10 | -37.0(3)  |
| C3 | B5 | B9  | B8  | -60.8(4)  | B5 | B6 | B8  | B2  | -63.5(4)  |
| C3 | B5 | B10 | B1  | 33.8(3)   | B5 | B6 | B8  | B3  | 0.6(4)    |
| C3 | B5 | B10 | B6  | 135.8(3)  | B5 | B6 | B8  | B7  | -100.2(3) |
| C3 | B5 | B10 | B7  | 97.7(3)   | B5 | B6 | B8  | B9  | 38.2(3)   |
| C4 | C3 | B1  | C2  | 111.6(4)  | B5 | B6 | B9  | B3  | -100.3(3) |
| C4 | C3 | B1  | C13 | -4.6(5)   | B5 | B6 | B9  | B4  | -36.9(3)  |
| C4 | C3 | B1  | B2  | 146.4(3)  | B5 | B6 | B9  | B8  | -137.0(3) |

|     |     |     |     |           |    |    |     |     |           |
|-----|-----|-----|-----|-----------|----|----|-----|-----|-----------|
| C4  | C3  | B1  | B7  | -151.6(3) | B5 | B6 | B10 | C3  | 38.7(3)   |
| C4  | C3  | B1  | B10 | -111.7(4) | B5 | B6 | B10 | B1  | 103.4(4)  |
| C4  | C3  | B4  | C2  | -110.0(4) | B5 | B6 | B10 | B7  | 138.1(3)  |
| C4  | C3  | B4  | B3  | -147.0(3) | B6 | B5 | B9  | B3  | 100.0(4)  |
| C4  | C3  | B4  | B5  | 110.7(4)  | B6 | B5 | B9  | B4  | 138.7(4)  |
| C4  | C3  | B4  | B9  | 150.4(4)  | B6 | B5 | B9  | B8  | 38.1(3)   |
| C4  | C3  | B5  | B4  | -108.5(4) | B6 | B5 | B10 | C3  | -135.8(3) |
| C4  | C3  | B5  | B6  | 149.2(3)  | B6 | B5 | B10 | B1  | -102.0(4) |
| C4  | C3  | B5  | B9  | -148.0(3) | B6 | B5 | B10 | B7  | -38.1(3)  |
| C4  | C3  | B5  | B10 | 110.5(4)  | B6 | B7 | B8  | B2  | -139.5(3) |
| C4  | C3  | B10 | B1  | 106.0(4)  | B6 | B7 | B8  | B3  | -101.2(4) |
| C4  | C3  | B10 | B5  | -110.4(4) | B6 | B7 | B8  | B9  | -37.4(3)  |
| C4  | C3  | B10 | B6  | -149.9(4) | B6 | B7 | B10 | C3  | 100.5(3)  |
| C4  | C3  | B10 | B7  | 146.5(4)  | B6 | B7 | B10 | B1  | 141.7(3)  |
| C4  | C5  | C6  | C7  | 176.8(4)  | B6 | B7 | B10 | B5  | 38.1(3)   |
| C8  | N1  | C1  | O1  | -1.9(6)   | B6 | B8 | B9  | B3  | -138.2(3) |
| C8  | N1  | C1  | C2  | 176.3(4)  | B6 | B8 | B9  | B4  | -101.3(3) |
| C8  | N1  | C11 | C12 | -78.4(5)  | B6 | B8 | B9  | B5  | -38.2(3)  |
| C11 | N1  | C1  | O1  | 168.3(4)  | B7 | B1 | B2  | C2  | -132.0(3) |
| C11 | N1  | C1  | C2  | -13.6(7)  | B7 | B1 | B2  | C20 | 111.8(4)  |
| C11 | N1  | C8  | C9  | -84.8(4)  | B7 | B1 | B2  | B3  | -97.4(3)  |
| C13 | C14 | C15 | C16 | -0.4(6)   | B7 | B1 | B2  | B8  | -35.7(3)  |
| C13 | B1  | B2  | C2  | 116.7(4)  | B7 | B1 | B10 | C3  | 133.7(3)  |
| C13 | B1  | B2  | C20 | 0.5(6)    | B7 | B1 | B10 | B5  | 100.6(4)  |
| C13 | B1  | B2  | B3  | 151.3(4)  | B7 | B1 | B10 | B6  | 35.2(3)   |
| C13 | B1  | B2  | B7  | -111.3(4) | B7 | B2 | B3  | C2  | -97.2(3)  |
| C13 | B1  | B2  | B8  | -147.0(4) | B7 | B2 | B3  | B4  | -63.7(4)  |
| C13 | B1  | B7  | B2  | 114.9(4)  | B7 | B2 | B3  | B8  | 37.2(3)   |
| C13 | B1  | B7  | B6  | -143.7(4) | B7 | B2 | B3  | B9  | 0.1(4)    |
| C13 | B1  | B7  | B8  | 152.0(4)  | B7 | B2 | B8  | B3  | -137.3(3) |
| C13 | B1  | B7  | B10 | -109.0(4) | B7 | B2 | B8  | B6  | -36.7(3)  |
| C13 | B1  | B10 | C3  | -113.6(4) | B7 | B2 | B8  | B9  | -100.7(3) |
| C13 | B1  | B10 | B5  | -146.6(4) | B7 | B6 | B8  | B2  | 36.7(3)   |
| C13 | B1  | B10 | B6  | 147.9(4)  | B7 | B6 | B8  | B3  | 100.8(3)  |
| C13 | B1  | B10 | B7  | 112.7(4)  | B7 | B6 | B8  | B9  | 138.3(3)  |
| C14 | C13 | C18 | C17 | 0.8(6)    | B7 | B6 | B9  | B3  | -0.5(4)   |
| C14 | C13 | B1  | C2  | -138.3(4) | B7 | B6 | B9  | B4  | 62.9(4)   |
| C14 | C13 | B1  | C3  | -67.3(5)  | B7 | B6 | B9  | B5  | 99.8(4)   |
| C14 | C13 | B1  | B2  | 148.0(4)  | B7 | B6 | B9  | B8  | -37.1(3)  |
| C14 | C13 | B1  | B7  | 73.5(5)   | B7 | B6 | B10 | C3  | -99.4(3)  |
| C14 | C13 | B1  | B10 | 1.8(6)    | B7 | B6 | B10 | B1  | -34.8(3)  |
| C14 | C15 | C16 | C17 | 1.7(6)    | B7 | B6 | B10 | B5  | -138.1(3) |
| C14 | C15 | C16 | C19 | -177.9(4) | B7 | B8 | B9  | B3  | -100.7(3) |
| C15 | C16 | C17 | C18 | -1.7(6)   | B7 | B8 | B9  | B4  | -63.8(4)  |
| C16 | C17 | C18 | C13 | 0.5(6)    | B7 | B8 | B9  | B5  | -0.8(4)   |

|     |     |     |     |           |    |    |     |     |           |
|-----|-----|-----|-----|-----------|----|----|-----|-----|-----------|
| C18 | C13 | C14 | C15 | -0.8(6)   | B7 | B8 | B9  | B6  | 37.5(3)   |
| C18 | C13 | B1  | C2  | 48.1(6)   | B8 | B2 | B3  | C2  | -134.3(3) |
| C18 | C13 | B1  | C3  | 119.1(4)  | B8 | B2 | B3  | B4  | -100.9(4) |
| C18 | C13 | B1  | B2  | -25.6(6)  | B8 | B2 | B3  | B9  | -37.1(3)  |
| C18 | C13 | B1  | B7  | -100.1(5) | B8 | B2 | B7  | B1  | 139.3(3)  |
| C18 | C13 | B1  | B10 | -171.8(4) | B8 | B2 | B7  | B6  | 36.5(3)   |
| C19 | C16 | C17 | C18 | 177.8(4)  | B8 | B2 | B7  | B10 | 99.8(4)   |
| C20 | C21 | C22 | C23 | -1.3(6)   | B8 | B3 | B4  | C2  | -98.7(3)  |
| C20 | B2  | B3  | C2  | 114.9(4)  | B8 | B3 | B4  | C3  | -62.2(4)  |
| C20 | B2  | B3  | B4  | 148.4(4)  | B8 | B3 | B4  | B5  | -1.6(4)   |
| C20 | B2  | B3  | B8  | -110.8(4) | B8 | B3 | B4  | B9  | 37.5(3)   |
| C20 | B2  | B3  | B9  | -147.9(4) | B8 | B3 | B9  | B4  | -138.7(3) |
| C20 | B2  | B7  | B1  | -109.9(4) | B8 | B3 | B9  | B5  | -100.1(3) |
| C20 | B2  | B7  | B6  | 147.3(4)  | B8 | B3 | B9  | B6  | -37.0(3)  |
| C20 | B2  | B7  | B8  | 110.8(4)  | B8 | B6 | B7  | B1  | -102.3(3) |
| C20 | B2  | B7  | B10 | -149.4(4) | B8 | B6 | B7  | B2  | -36.8(3)  |
| C20 | B2  | B8  | B3  | 110.8(4)  | B8 | B6 | B7  | B10 | -137.3(3) |
| C20 | B2  | B8  | B6  | -148.6(4) | B8 | B6 | B9  | B3  | 36.6(3)   |
| C20 | B2  | B8  | B7  | -111.9(4) | B8 | B6 | B9  | B4  | 100.0(4)  |
| C20 | B2  | B8  | B9  | 147.4(4)  | B8 | B6 | B9  | B5  | 137.0(3)  |
| C21 | C20 | C25 | C24 | 0.7(5)    | B8 | B6 | B10 | C3  | -61.7(4)  |
| C21 | C20 | B2  | C2  | -171.5(3) | B8 | B6 | B10 | B1  | 3.0(4)    |
| C21 | C20 | B2  | B1  | -96.5(4)  | B8 | B6 | B10 | B5  | -100.4(3) |
| C21 | C20 | B2  | B3  | 116.7(4)  | B8 | B6 | B10 | B7  | 37.7(3)   |
| C21 | C20 | B2  | B7  | -25.7(5)  | B8 | B7 | B10 | C3  | 62.6(4)   |
| C21 | C20 | B2  | B8  | 46.0(5)   | B8 | B7 | B10 | B1  | 103.8(3)  |
| C21 | C22 | C23 | C24 | 1.9(6)    | B8 | B7 | B10 | B5  | 0.2(4)    |
| C21 | C22 | C23 | C26 | -178.2(4) | B8 | B7 | B10 | B6  | -37.9(3)  |
| C22 | C23 | C24 | C25 | -1.2(6)   | B9 | B3 | B4  | C2  | -136.1(3) |
| C23 | C24 | C25 | C20 | 0.0(6)    | B9 | B3 | B4  | C3  | -99.7(3)  |
| C25 | C20 | C21 | C22 | 0.0(6)    | B9 | B3 | B4  | B5  | -39.0(3)  |
| C25 | C20 | B2  | C2  | 6.2(6)    | B9 | B3 | B8  | B2  | 139.6(3)  |
| C25 | C20 | B2  | B1  | 81.3(5)   | B9 | B3 | B8  | B6  | 37.5(3)   |
| C25 | C20 | B2  | B3  | -65.5(5)  | B9 | B3 | B8  | B7  | 101.3(3)  |
| C25 | C20 | B2  | B7  | 152.0(4)  | B9 | B4 | B5  | C3  | -135.0(3) |
| C25 | C20 | B2  | B8  | -136.3(4) | B9 | B4 | B5  | B6  | -37.0(3)  |
| C26 | C23 | C24 | C25 | 178.9(4)  | B9 | B4 | B5  | B10 | -100.4(4) |
| B1  | C2  | C3  | C4  | -106.8(4) | B9 | B5 | B6  | B7  | -101.2(3) |
| B1  | C2  | C3  | B4  | 145.0(3)  | B9 | B5 | B6  | B8  | -38.3(3)  |
| B1  | C2  | C3  | B5  | 107.3(3)  | B9 | B5 | B6  | B10 | -138.3(3) |
| B1  | C2  | C3  | B10 | 40.3(3)   | B9 | B5 | B10 | C3  | -98.4(3)  |
| B1  | C2  | B2  | C20 | 110.1(4)  | B9 | B5 | B10 | B1  | -64.6(4)  |
| B1  | C2  | B2  | B3  | -140.6(3) | B9 | B5 | B10 | B6  | 37.4(3)   |
| B1  | C2  | B2  | B7  | -40.8(3)  | B9 | B5 | B10 | B7  | -0.7(4)   |
| B1  | C2  | B2  | B8  | -101.8(3) | B9 | B6 | B7  | B1  | -64.9(4)  |

|    |     |     |     |           |     |    |     |     |           |
|----|-----|-----|-----|-----------|-----|----|-----|-----|-----------|
| B1 | C2  | B3  | B2  | 37.1(3)   | B9  | B6 | B7  | B2  | 0.5(4)    |
| B1 | C2  | B3  | B4  | -105.8(3) | B9  | B6 | B7  | B8  | 37.3(3)   |
| B1 | C2  | B3  | B8  | -3.8(4)   | B9  | B6 | B7  | B10 | -100.0(4) |
| B1 | C2  | B3  | B9  | -67.4(4)  | B9  | B6 | B8  | B2  | -101.6(3) |
| B1 | C2  | B4  | C3  | -33.3(3)  | B9  | B6 | B8  | B3  | -37.6(3)  |
| B1 | C2  | B4  | B3  | 103.6(3)  | B9  | B6 | B8  | B7  | -138.3(3) |
| B1 | C2  | B4  | B5  | 1.8(4)    | B9  | B6 | B10 | C3  | 1.6(4)    |
| B1 | C2  | B4  | B9  | 64.8(4)   | B9  | B6 | B10 | B1  | 66.3(4)   |
| B1 | C3  | C4  | C5  | -140.7(4) | B9  | B6 | B10 | B5  | -37.1(3)  |
| B1 | C3  | B4  | C2  | 34.3(3)   | B9  | B6 | B10 | B7  | 101.1(4)  |
| B1 | C3  | B4  | B3  | -2.7(4)   | B10 | C3 | C4  | C5  | 148.1(4)  |
| B1 | C3  | B4  | B5  | -105.0(4) | B10 | C3 | B1  | C2  | -136.7(3) |
| B1 | C3  | B4  | B9  | -65.3(4)  | B10 | C3 | B1  | C13 | 107.1(4)  |
| B1 | C3  | B5  | B4  | 106.1(3)  | B10 | C3 | B1  | B2  | -101.9(3) |
| B1 | C3  | B5  | B6  | 3.8(4)    | B10 | C3 | B1  | B7  | -39.9(3)  |
| B1 | C3  | B5  | B9  | 66.6(4)   | B10 | C3 | B4  | C2  | 102.3(3)  |
| B1 | C3  | B5  | B10 | -34.9(3)  | B10 | C3 | B4  | B3  | 65.3(4)   |
| B1 | C3  | B10 | B5  | 143.6(3)  | B10 | C3 | B4  | B5  | -37.0(3)  |
| B1 | C3  | B10 | B6  | 104.1(3)  | B10 | C3 | B4  | B9  | 2.7(4)    |
| B1 | C3  | B10 | B7  | 40.5(3)   | B10 | C3 | B5  | B4  | 141.0(3)  |
| B1 | C13 | C14 | C15 | -174.9(4) | B10 | C3 | B5  | B6  | 38.7(3)   |
| B1 | C13 | C18 | C17 | 174.6(4)  | B10 | C3 | B5  | B9  | 101.5(3)  |
| B1 | B2  | B3  | C2  | -35.8(3)  | B10 | B1 | B2  | C2  | -93.3(3)  |
| B1 | B2  | B3  | B4  | -2.3(4)   | B10 | B1 | B2  | C20 | 150.5(4)  |
| B1 | B2  | B3  | B8  | 98.6(3)   | B10 | B1 | B2  | B3  | -58.7(4)  |
| B1 | B2  | B3  | B9  | 61.5(4)   | B10 | B1 | B2  | B7  | 38.7(3)   |
| B1 | B2  | B7  | B6  | -102.8(4) | B10 | B1 | B2  | B8  | 3.0(4)    |
| B1 | B2  | B7  | B8  | -139.3(3) | B10 | B1 | B7  | B2  | -136.1(3) |
| B1 | B2  | B7  | B10 | -39.5(3)  | B10 | B1 | B7  | B6  | -34.7(3)  |
| B1 | B2  | B8  | B3  | -101.9(3) | B10 | B1 | B7  | B8  | -99.0(4)  |
| B1 | B2  | B8  | B6  | -1.3(4)   | B10 | B5 | B6  | B7  | 37.1(3)   |
| B1 | B2  | B8  | B7  | 35.4(3)   | B10 | B5 | B6  | B8  | 99.9(4)   |
| B1 | B2  | B8  | B9  | -65.3(4)  | B10 | B5 | B6  | B9  | 138.3(3)  |
| B1 | B7  | B8  | B2  | -37.5(3)  | B10 | B5 | B9  | B3  | 62.8(4)   |
| B1 | B7  | B8  | B3  | 0.8(4)    | B10 | B5 | B9  | B4  | 101.5(4)  |
| B1 | B7  | B8  | B6  | 102.0(4)  | B10 | B5 | B9  | B6  | -37.2(3)  |
| B1 | B7  | B8  | B9  | 64.6(4)   | B10 | B5 | B9  | B8  | 0.9(4)    |
| B1 | B7  | B10 | C3  | -41.2(3)  | B10 | B6 | B7  | B1  | 35.1(3)   |
| B1 | B7  | B10 | B5  | -103.5(3) | B10 | B6 | B7  | B2  | 100.5(3)  |
| B1 | B7  | B10 | B6  | -141.7(3) | B10 | B6 | B7  | B8  | 137.3(3)  |
| B2 | C2  | C3  | C4  | -144.9(3) | B10 | B6 | B8  | B2  | -1.0(4)   |
| B2 | C2  | C3  | B1  | -38.2(3)  | B10 | B6 | B8  | B3  | 63.1(4)   |
| B2 | C2  | C3  | B4  | 106.8(3)  | B10 | B6 | B8  | B7  | -37.7(3)  |
| B2 | C2  | C3  | B5  | 69.1(4)   | B10 | B6 | B8  | B9  | 100.6(4)  |
| B2 | C2  | C3  | B10 | 2.2(4)    | B10 | B6 | B9  | B3  | -63.4(4)  |

|    |    |    |     |           |     |    |    |    |           |
|----|----|----|-----|-----------|-----|----|----|----|-----------|
| B2 | C2 | B1 | C3  | 138.8(3)  | B10 | B6 | B9 | B4 | 0.0(4)    |
| B2 | C2 | B1 | C13 | -111.6(5) | B10 | B6 | B9 | B5 | 36.9(3)   |
| B2 | C2 | B1 | B7  | 41.5(3)   | B10 | B6 | B9 | B8 | -100.0(4) |
| B2 | C2 | B1 | B10 | 102.7(3)  | B10 | B7 | B8 | B2 | -101.8(3) |
| B2 | C2 | B3 | B4  | -142.9(3) | B10 | B7 | B8 | B3 | -63.5(4)  |
| B2 | C2 | B3 | B8  | -40.8(3)  | B10 | B7 | B8 | B6 | 37.7(3)   |
| B2 | C2 | B3 | B9  | -104.5(3) | B10 | B7 | B8 | B9 | 0.3(4)    |

**Hydrogen Atom Coordinates ( $\text{\AA}\times 10^4$ ) and Isotropic Displacement Parameters ( $\text{\AA}^2\times 10^3$ ) for mo\_0848\_CG\_0m\_4.**

| Atom | x       | y        | z        | U(eq) |
|------|---------|----------|----------|-------|
| H4A  | 3438.8  | 7144.07  | 5349.5   | 27    |
| H4B  | 2771.38 | 6268.1   | 4789.27  | 27    |
| H5A  | 1081.63 | 7247.77  | 4578.66  | 29    |
| H5B  | 1641.83 | 8067.21  | 5211.34  | 29    |
| H6A  | 2382.52 | 7892.1   | 3971.77  | 37    |
| H6B  | 2876.23 | 8745.94  | 4593.65  | 37    |
| H7A  | 1560.01 | 9621.47  | 3642.01  | 63    |
| H7B  | 1079.93 | 9630.89  | 4310.82  | 63    |
| H7C  | 590.22  | 8779.32  | 3686.93  | 63    |
| H8A  | 3484.06 | 9756.83  | 6943.07  | 37    |
| H8B  | 2399.21 | 10181.36 | 7159.81  | 37    |
| H9A  | 2518.01 | 11082.77 | 6130.2   | 67    |
| H9B  | 1376.45 | 10376.11 | 5954.99  | 67    |
| H9C  | 2452.91 | 9939.98  | 5734.73  | 67    |
| H11A | 725.06  | 7858.53  | 6686.21  | 31    |
| H11B | 587.33  | 9149.8   | 6605.26  | 31    |
| H12A | 337.1   | 8662.42  | 7690.3   | 52    |
| H12B | 1503.64 | 9327.27  | 7847.65  | 52    |
| H12C | 1526.01 | 8029.58  | 7910.34  | 52    |
| H14  | 5092.17 | 5153.33  | 5699.78  | 24    |
| H15  | 6980.23 | 5501.34  | 5789.71  | 27    |
| H17  | 7184.43 | 7481.88  | 7441.65  | 26    |
| H18  | 5301.96 | 7138.75  | 7352.28  | 26    |
| H19A | 8575.94 | 7595.66  | 6585.22  | 50    |
| H19B | 8733.63 | 6407.16  | 6298.51  | 50    |
| H19C | 8996.62 | 6612.8   | 7126.5   | 50    |
| H21  | 4273.73 | 4515.82  | 8292.84  | 25    |
| H22  | 5417.56 | 4878.92  | 9418.55  | 31    |
| H24  | 4913.86 | 8092.38  | 9065.74  | 28    |
| H25  | 3740.13 | 7738.11  | 7946.75  | 26    |
| H26A | 5651.59 | 7076.56  | 10378.77 | 52    |
| H26B | 6675.13 | 7293.1   | 10047.52 | 52    |
| H26C | 6461.99 | 6095.92  | 10299.22 | 52    |

|     |         |         |         |    |
|-----|---------|---------|---------|----|
| H3  | 1205.5  | 6430.25 | 7265.09 | 23 |
| H4  | 552     | 6838.36 | 5731.14 | 25 |
| H5  | 990.87  | 4844.53 | 5033.13 | 25 |
| H6  | 1852.61 | 3164.31 | 6142.01 | 27 |
| H7  | 4058.64 | 3947.21 | 7061.35 | 22 |
| H8  | 1987.47 | 4177.52 | 7514.71 | 23 |
| H9  | 66.29   | 4711.67 | 6258.06 | 25 |
| H10 | 3410.67 | 4356.29 | 5525.16 | 23 |

## Experimental

Single crystals of C<sub>25</sub>H<sub>41</sub>B<sub>10</sub>NO [mo\_0848\_CG\_0m\_4] were recrystallised from a mixture of chloroform and hexane by slow evaporation. A suitable crystal was selected and the crystal was mounted on a MITIGEN holder oil on a Bruker D8 Venture AgCu Dual Source diffractometer. The crystal was kept at 100.03 K during data collection. Using Olex2<sup>[2]</sup>, the structure was solved with the XT<sup>[3]</sup> structure solution program using Intrinsic Phasing and refined with the XL<sup>[4]</sup> refinement package using Least Squares minimisation.

### Crystal structure determination of 3fa

**Crystal Data** for C<sub>25</sub>H<sub>41</sub>B<sub>10</sub>NO (*M* = 479.69 g/mol): monoclinic, space group P2<sub>1</sub>/c (no. 14), *a* = 12.2842(10) Å, *b* = 12.2978(10) Å, *c* = 19.8427(15) Å, β = 106.783(2)°, *V* = 2869.9(4) Å<sup>3</sup>, *Z* = 4, *T* = 100.0 K, μ(MoKα) = 0.060 mm<sup>-1</sup>, *D*<sub>calc</sub> = 1.110 g/cm<sup>3</sup>, 11362 reflections measured (3.946° ≤ 2θ ≤ 52.818°), 11362 unique (*R*<sub>int</sub> = ?, *R*<sub>sigma</sub> = 0.0660) which were used in all calculations. The final *R*<sub>1</sub> was 0.0861 (*I* > 2σ(*I*)) and *wR*<sub>2</sub> was 0.1966 (all data).

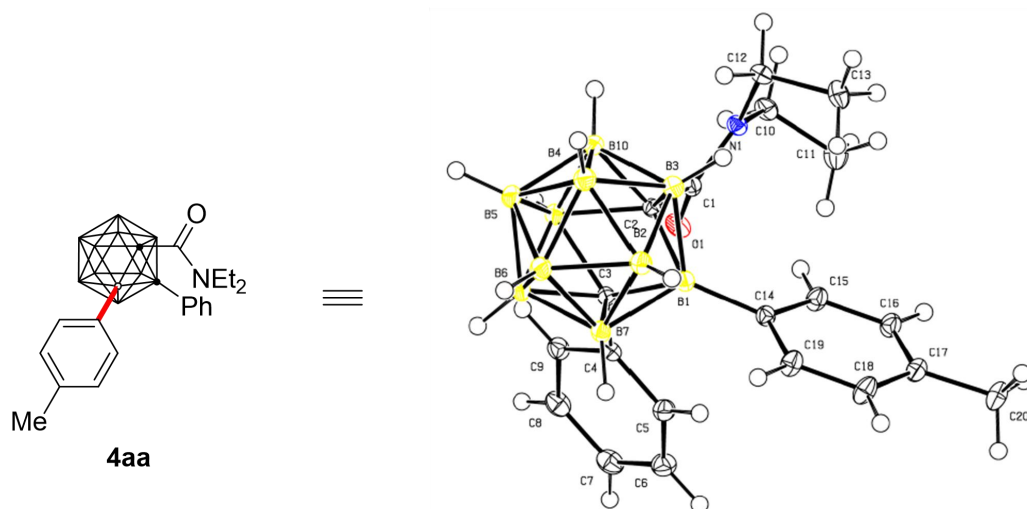

CCDC 1893313

**Crystal data and structure refinement for 4aa.**

|                                             |                                                               |
|---------------------------------------------|---------------------------------------------------------------|
| Identification code                         | 0544_CG_0m                                                    |
| CCDC number                                 | 1893305                                                       |
| Empirical formula                           | C <sub>20</sub> H <sub>31</sub> B <sub>10</sub> NO            |
| Formula weight                              | 409.56                                                        |
| Temperature/K                               | 100.02                                                        |
| Crystal system                              | monoclinic                                                    |
| Space group                                 | P2 <sub>1</sub> /c                                            |
| a/Å                                         | 9.9001(6)                                                     |
| b/Å                                         | 10.5092(9)                                                    |
| c/Å                                         | 21.5172(15)                                                   |
| α/°                                         | 90                                                            |
| β/°                                         | 90.643(3)                                                     |
| γ/°                                         | 90                                                            |
| Volume/Å <sup>3</sup>                       | 2238.6(3)                                                     |
| Z                                           | 4                                                             |
| ρ <sub>calc</sub> /cm <sup>3</sup>          | 1.215                                                         |
| μ/mm <sup>-1</sup>                          | 0.066                                                         |
| F(000)                                      | 864.0                                                         |
| Crystal size/mm <sup>3</sup>                | 0.601 × 0.531 × 0.45                                          |
| Radiation                                   | MoKα (λ = 0.71073)                                            |
| 2θ range for data collection/°              | 4.314 to 61.04                                                |
| Index ranges                                | -14 ≤ h ≤ 11, -15 ≤ k ≤ 15, -30 ≤ l ≤ 30                      |
| Reflections collected                       | 42852                                                         |
| Independent reflections                     | 6725 [R <sub>int</sub> = 0.0241, R <sub>sigma</sub> = 0.0168] |
| Data/restraints/parameters                  | 6725/0/328                                                    |
| Goodness-of-fit on F <sup>2</sup>           | 1.048                                                         |
| Final R indexes [I ≥ 2σ (I)]                | R <sub>1</sub> = 0.0380, wR <sub>2</sub> = 0.1027             |
| Final R indexes [all data]                  | R <sub>1</sub> = 0.0401, wR <sub>2</sub> = 0.1045             |
| Largest diff. peak/hole / e Å <sup>-3</sup> | 0.41/-0.20                                                    |

**Fractional Atomic Coordinates (×10<sup>4</sup>) and Equivalent Isotropic Displacement Parameters (Å<sup>2</sup>×10<sup>3</sup>) for 0544\_CG\_0m. U<sub>eq</sub> is defined as 1/3 of the trace of the orthogonalised U<sub>ij</sub> tensor.**

| Atom | x         | y         | z         | U(eq)     |
|------|-----------|-----------|-----------|-----------|
| O1   | 4102.8(6) | 8491.8(6) | 5408.1(3) | 17.17(13) |
| N1   | 5820.9(7) | 8610.4(6) | 6100.3(3) | 12.73(13) |
| C1   | 4505.6(8) | 8448.2(7) | 5948.5(4) | 12.26(14) |
| C2   | 3415.3(7) | 8262.8(7) | 6449.3(4) | 11.79(14) |
| C3   | 1825.9(7) | 7836.8(7) | 6137.2(4) | 12.27(14) |
| C4   | 1530.0(7) | 7547.0(8) | 5460.4(4) | 13.20(14) |
| C5   | 1502.1(8) | 6293.7(8) | 5247.3(4) | 16.61(15) |
| C6   | 1101.7(9) | 6023.3(9) | 4638.1(4) | 19.94(17) |
| C7   | 703.2(9)  | 6993.1(9) | 4238.2(4) | 20.42(17) |

|     |            |            |           |           |
|-----|------------|------------|-----------|-----------|
| C8  | 714.4(9)   | 8241.0(9)  | 4450.9(4) | 19.81(17) |
| C9  | 1123.7(8)  | 8520.2(8)  | 5055.4(4) | 16.78(15) |
| C10 | 6717.8(8)  | 8879.9(8)  | 5570.3(4) | 16.00(15) |
| C11 | 7187.7(10) | 7699.3(10) | 5224.3(4) | 23.65(18) |
| C12 | 6477.8(8)  | 8538.0(8)  | 6715.2(4) | 15.21(15) |
| C13 | 7102.9(9)  | 7240.0(9)  | 6846.1(4) | 20.46(17) |
| C14 | 3425.4(8)  | 5481.2(7)  | 6391.2(4) | 12.78(14) |
| C15 | 4528.6(8)  | 5398.7(8)  | 5992.4(4) | 17.32(16) |
| C16 | 5174.0(9)  | 4245.5(8)  | 5880.0(4) | 17.96(16) |
| C17 | 4735.7(9)  | 3124.2(8)  | 6154.9(4) | 15.98(15) |
| C18 | 3592.8(10) | 3185.4(8)  | 6528.5(4) | 19.80(17) |
| C19 | 2959.7(9)  | 4337.8(8)  | 6648.3(4) | 17.73(16) |
| C20 | 5461.9(10) | 1883.5(8)  | 6055.8(4) | 21.19(17) |
| B1  | 2753.1(9)  | 6758.9(8)  | 6605.0(4) | 12.55(15) |
| B2  | 2007.1(9)  | 6952.4(9)  | 7359.1(4) | 14.64(16) |
| B3  | 3548.5(9)  | 7719.9(9)  | 7195.7(4) | 13.85(16) |
| B4  | 2297.1(9)  | 8546.9(9)  | 7621.7(4) | 16.35(17) |
| B5  | 1433.8(9)  | 9591.2(9)  | 7095.6(4) | 16.49(17) |
| B6  | 602.7(9)   | 8639.4(9)  | 6530.1(4) | 15.07(16) |
| B7  | 966.5(9)   | 7014.1(8)  | 6687.0(4) | 13.87(16) |
| B8  | 697.7(9)   | 8105.3(9)  | 7310.8(4) | 16.05(17) |
| B9  | 2155.2(9)  | 9396.0(8)  | 6352.7(4) | 14.20(16) |
| B10 | 3204.6(9)  | 9346.7(8)  | 7032.2(4) | 14.58(16) |

**Anisotropic Displacement Parameters ( $\text{\AA}^2 \times 10^3$ ) for 0544\_CG\_0m. The Anisotropic displacement factor exponent takes the form:  $-2\pi^2[h^2a^{*2}U_{11}+2hka^*b^*U_{12}+\dots]$ .**

| Atom | U <sub>11</sub> | U <sub>22</sub> | U <sub>33</sub> | U <sub>23</sub> | U <sub>13</sub> | U <sub>12</sub> |
|------|-----------------|-----------------|-----------------|-----------------|-----------------|-----------------|
| O1   | 14.1(3)         | 23.2(3)         | 14.2(3)         | 3.9(2)          | -0.7(2)         | -1.5(2)         |
| N1   | 10.9(3)         | 13.4(3)         | 13.9(3)         | 1.6(2)          | 0.4(2)          | -0.6(2)         |
| C1   | 11.6(3)         | 10.4(3)         | 14.8(3)         | 1.5(2)          | 1.4(2)          | 0.0(2)          |
| C2   | 10.3(3)         | 11.3(3)         | 13.7(3)         | 0.6(2)          | 0.3(2)          | -0.1(2)         |
| C3   | 10.4(3)         | 11.4(3)         | 14.9(3)         | 0.9(3)          | -0.2(2)         | 0.5(2)          |
| C4   | 10.5(3)         | 15.0(3)         | 14.0(3)         | 0.9(3)          | -0.4(2)         | -0.6(3)         |
| C5   | 17.0(3)         | 15.6(4)         | 17.2(4)         | -0.4(3)         | -1.8(3)         | -0.2(3)         |
| C6   | 20.0(4)         | 21.2(4)         | 18.6(4)         | -4.0(3)         | -1.0(3)         | -1.1(3)         |
| C7   | 17.4(4)         | 28.8(4)         | 15.1(4)         | -0.7(3)         | -0.6(3)         | -1.7(3)         |
| C8   | 18.2(4)         | 24.1(4)         | 17.1(4)         | 5.2(3)          | -2.1(3)         | -0.1(3)         |
| C9   | 15.8(3)         | 16.4(4)         | 18.1(4)         | 2.7(3)          | -1.5(3)         | 0.1(3)          |
| C10  | 12.2(3)         | 18.7(4)         | 17.2(3)         | 3.2(3)          | 2.7(3)          | -2.0(3)         |
| C11  | 24.6(4)         | 27.0(4)         | 19.5(4)         | 0.1(3)          | 6.2(3)          | 5.4(3)          |
| C12  | 12.0(3)         | 18.2(4)         | 15.4(3)         | -0.2(3)         | -1.9(3)         | -1.7(3)         |
| C13  | 17.6(4)         | 25.2(4)         | 18.5(4)         | 3.7(3)          | -1.0(3)         | 6.0(3)          |
| C14  | 12.7(3)         | 11.9(3)         | 13.7(3)         | 1.3(2)          | -0.1(2)         | 0.6(3)          |
| C15  | 17.5(3)         | 12.6(3)         | 22.0(4)         | 1.0(3)          | 5.6(3)          | -0.5(3)         |



|     |         |         |         |         |         |         |
|-----|---------|---------|---------|---------|---------|---------|
| C16 | 16.4(3) | 15.3(4) | 22.3(4) | -1.9(3) | 4.7(3)  | 0.6(3)  |
| C17 | 20.1(4) | 13.5(3) | 14.3(3) | -1.2(3) | -1.0(3) | 2.9(3)  |
| C18 | 28.2(4) | 12.0(3) | 19.4(4) | 2.7(3)  | 6.7(3)  | 1.1(3)  |
| C19 | 20.6(4) | 13.7(3) | 19.0(4) | 2.3(3)  | 6.5(3)  | 0.2(3)  |
| C20 | 29.0(4) | 14.9(4) | 19.7(4) | -1.4(3) | 1.6(3)  | 7.2(3)  |
| B1  | 11.9(3) | 11.6(3) | 14.2(4) | 1.8(3)  | 1.2(3)  | 0.2(3)  |
| B2  | 14.0(4) | 15.5(4) | 14.5(4) | 1.0(3)  | 2.8(3)  | 0.1(3)  |
| B3  | 13.7(3) | 14.9(4) | 13.0(3) | 0.7(3)  | 0.9(3)  | 0.2(3)  |
| B4  | 15.8(4) | 17.1(4) | 16.1(4) | -1.7(3) | 2.6(3)  | 0.1(3)  |
| B5  | 14.6(4) | 15.1(4) | 19.9(4) | -2.6(3) | 2.3(3)  | 1.4(3)  |
| B6  | 12.0(3) | 13.9(4) | 19.4(4) | -0.5(3) | 1.5(3)  | 1.7(3)  |
| B7  | 11.8(3) | 13.6(4) | 16.2(4) | 0.9(3)  | 2.3(3)  | -0.2(3) |
| B8  | 14.0(4) | 16.3(4) | 18.0(4) | -1.1(3) | 3.5(3)  | 0.5(3)  |
| B9  | 12.6(3) | 11.8(4) | 18.2(4) | 0.2(3)  | 0.2(3)  | 1.2(3)  |
| B10 | 14.3(4) | 13.1(4) | 16.4(4) | -1.9(3) | 1.0(3)  | 0.1(3)  |

#### Bond Lengths for 0544\_CG\_0m.

| Atom | Atom | Length/Å   | Atom | Atom | Length/Å   |
|------|------|------------|------|------|------------|
| O1   | C1   | 1.2259(10) | C15  | C16  | 1.3924(11) |
| N1   | C1   | 1.3497(10) | C16  | C17  | 1.3902(12) |
| N1   | C10  | 1.4804(10) | C17  | C18  | 1.3968(12) |
| N1   | C12  | 1.4698(10) | C17  | C20  | 1.5052(12) |
| C1   | C2   | 1.5461(10) | C18  | C19  | 1.3891(12) |
| C2   | C3   | 1.7617(11) | B1   | B2   | 1.8018(12) |
| C2   | B1   | 1.7449(12) | B1   | B3   | 1.7981(13) |
| C2   | B3   | 1.7080(12) | B1   | B7   | 1.7996(12) |
| C2   | B9   | 1.7355(12) | B2   | B3   | 1.7649(13) |
| C2   | B10  | 1.7088(12) | B2   | B4   | 1.7905(13) |
| C3   | C4   | 1.5132(11) | B2   | B7   | 1.7673(13) |
| C3   | B1   | 1.7659(12) | B2   | B8   | 1.7766(13) |
| C3   | B6   | 1.7075(12) | B3   | B4   | 1.7764(13) |
| C3   | B7   | 1.7010(12) | B3   | B10  | 1.7775(13) |
| C3   | B9   | 1.7329(12) | B4   | B5   | 1.7873(14) |
| C4   | C5   | 1.3947(11) | B4   | B8   | 1.7738(13) |
| C4   | C9   | 1.3997(11) | B4   | B10  | 1.7743(13) |
| C5   | C6   | 1.3945(11) | B5   | B6   | 1.7709(13) |
| C6   | C7   | 1.3882(13) | B5   | B8   | 1.7865(14) |
| C7   | C8   | 1.3890(13) | B5   | B9   | 1.7701(13) |
| C8   | C9   | 1.3894(12) | B5   | B10  | 1.7787(13) |
| C10  | C11  | 1.5225(13) | B6   | B7   | 1.7772(13) |
| C12  | C13  | 1.5229(12) | B6   | B8   | 1.7726(14) |
| C14  | C15  | 1.3992(11) | B6   | B9   | 1.7758(13) |
| C14  | C19  | 1.4029(11) | B7   | B8   | 1.7876(13) |

|     |    |            |    |     |            |
|-----|----|------------|----|-----|------------|
| C14 | B1 | 1.5699(12) | B9 | B10 | 1.7849(13) |
|-----|----|------------|----|-----|------------|

**Bond Angles for 0544\_CG\_0m.**

| Atom | Atom | Atom | Angle/°   | Atom | Atom | Atom | Angle/°   |
|------|------|------|-----------|------|------|------|-----------|
| C1   | N1   | C10  | 115.04(7) | C2   | B3   | B1   | 59.63(5)  |
| C1   | N1   | C12  | 128.84(7) | C2   | B3   | B2   | 106.38(6) |
| C12  | N1   | C10  | 116.12(6) | C2   | B3   | B4   | 105.95(6) |
| O1   | C1   | N1   | 121.83(7) | C2   | B3   | B10  | 58.67(5)  |
| O1   | C1   | C2   | 116.33(7) | B2   | B3   | B1   | 60.75(5)  |
| N1   | C1   | C2   | 121.78(7) | B2   | B3   | B4   | 60.74(5)  |
| C1   | C2   | C3   | 113.20(6) | B2   | B3   | B10  | 108.35(6) |
| C1   | C2   | B1   | 120.97(6) | B4   | B3   | B1   | 109.70(6) |
| C1   | C2   | B3   | 130.56(6) | B4   | B3   | B10  | 59.90(5)  |
| C1   | C2   | B9   | 109.67(6) | B10  | B3   | B1   | 108.60(6) |
| C1   | C2   | B10  | 121.29(6) | B3   | B4   | B2   | 59.31(5)  |
| B1   | C2   | C3   | 60.47(5)  | B3   | B4   | B5   | 107.76(6) |
| B3   | C2   | C3   | 109.44(6) | B5   | B4   | B2   | 107.52(6) |
| B3   | C2   | B1   | 62.75(5)  | B8   | B4   | B2   | 59.79(5)  |
| B3   | C2   | B9   | 112.93(6) | B8   | B4   | B3   | 107.59(6) |
| B3   | C2   | B10  | 62.69(5)  | B8   | B4   | B5   | 60.22(5)  |
| B9   | C2   | C3   | 59.40(5)  | B8   | B4   | B10  | 108.14(6) |
| B9   | C2   | B1   | 111.93(6) | B10  | B4   | B2   | 107.37(6) |
| B10  | C2   | C3   | 109.48(6) | B10  | B4   | B3   | 60.08(5)  |
| B10  | C2   | B1   | 114.44(6) | B10  | B4   | B5   | 59.92(5)  |
| B10  | C2   | B9   | 62.42(5)  | B6   | B5   | B4   | 107.67(7) |
| C2   | C3   | B1   | 59.29(4)  | B6   | B5   | B8   | 59.77(5)  |
| C4   | C3   | C2   | 125.49(6) | B6   | B5   | B10  | 108.45(6) |
| C4   | C3   | B1   | 120.88(6) | B8   | B5   | B4   | 59.52(5)  |
| C4   | C3   | B6   | 116.44(6) | B9   | B5   | B4   | 107.81(6) |
| C4   | C3   | B7   | 118.30(6) | B9   | B5   | B6   | 60.20(5)  |
| C4   | C3   | B9   | 118.80(6) | B9   | B5   | B8   | 107.61(6) |
| B6   | C3   | C2   | 108.73(6) | B9   | B5   | B10  | 60.39(5)  |
| B6   | C3   | B1   | 113.68(6) | B10  | B5   | B4   | 59.68(5)  |
| B6   | C3   | B9   | 62.15(5)  | B10  | B5   | B8   | 107.39(6) |
| B7   | C3   | C2   | 108.39(6) | C3   | B6   | B5   | 107.02(6) |
| B7   | C3   | B1   | 62.51(5)  | C3   | B6   | B7   | 58.40(5)  |
| B7   | C3   | B6   | 62.85(5)  | C3   | B6   | B8   | 106.40(6) |
| B7   | C3   | B9   | 112.86(6) | C3   | B6   | B9   | 59.63(5)  |
| B9   | C3   | C2   | 59.54(5)  | B5   | B6   | B7   | 108.71(6) |
| B9   | C3   | B1   | 111.04(6) | B5   | B6   | B8   | 60.55(5)  |
| C5   | C4   | C3   | 120.62(7) | B5   | B6   | B9   | 59.88(5)  |
| C5   | C4   | C9   | 118.75(7) | B8   | B6   | B7   | 60.47(5)  |
| C9   | C4   | C3   | 120.21(7) | B8   | B6   | B9   | 107.97(6) |

|     |     |     |           |    |     |     |           |
|-----|-----|-----|-----------|----|-----|-----|-----------|
| C6  | C5  | C4  | 120.38(8) | B9 | B6  | B7  | 107.28(6) |
| C7  | C6  | C5  | 120.59(8) | C3 | B7  | B1  | 60.51(5)  |
| C6  | C7  | C8  | 119.19(8) | C3 | B7  | B2  | 107.23(6) |
| C7  | C8  | C9  | 120.60(8) | C3 | B7  | B6  | 58.75(5)  |
| C8  | C9  | C4  | 120.48(8) | C3 | B7  | B8  | 106.02(6) |
| N1  | C10 | C11 | 114.20(7) | B2 | B7  | B1  | 60.67(5)  |
| N1  | C12 | C13 | 112.81(7) | B2 | B7  | B6  | 107.80(6) |
| C15 | C14 | C19 | 116.81(7) | B2 | B7  | B8  | 59.97(5)  |
| C15 | C14 | B1  | 124.69(7) | B6 | B7  | B1  | 108.78(6) |
| C19 | C14 | B1  | 118.35(7) | B6 | B7  | B8  | 59.64(5)  |
| C16 | C15 | C14 | 121.56(8) | B8 | B7  | B1  | 108.91(6) |
| C17 | C16 | C15 | 121.19(8) | B2 | B8  | B5  | 108.17(6) |
| C16 | C17 | C18 | 117.68(8) | B2 | B8  | B7  | 59.45(5)  |
| C16 | C17 | C20 | 121.48(8) | B4 | B8  | B2  | 60.57(5)  |
| C18 | C17 | C20 | 120.84(8) | B4 | B8  | B5  | 60.27(5)  |
| C19 | C18 | C17 | 121.14(8) | B4 | B8  | B7  | 108.13(6) |
| C18 | C19 | C14 | 121.50(8) | B5 | B8  | B7  | 107.55(6) |
| C2  | B1  | C3  | 60.23(4)  | B6 | B8  | B2  | 107.59(6) |
| C2  | B1  | B2  | 103.26(6) | B6 | B8  | B4  | 108.19(6) |
| C2  | B1  | B3  | 57.62(5)  | B6 | B8  | B5  | 59.68(5)  |
| C2  | B1  | B7  | 104.81(6) | B6 | B8  | B7  | 59.89(5)  |
| C3  | B1  | B2  | 103.02(6) | C2 | B9  | B5  | 105.55(6) |
| C3  | B1  | B3  | 105.27(6) | C2 | B9  | B6  | 106.84(6) |
| C3  | B1  | B7  | 56.98(5)  | C2 | B9  | B10 | 58.06(5)  |
| C14 | B1  | C2  | 123.85(6) | C3 | B9  | C2  | 61.05(5)  |
| C14 | B1  | C3  | 126.95(7) | C3 | B9  | B5  | 105.94(6) |
| C14 | B1  | B2  | 122.67(6) | C3 | B9  | B6  | 58.22(5)  |
| C14 | B1  | B3  | 120.25(6) | C3 | B9  | B10 | 107.33(6) |
| C14 | B1  | B7  | 125.21(7) | B5 | B9  | B6  | 59.92(5)  |
| B3  | B1  | B2  | 58.72(5)  | B5 | B9  | B10 | 60.04(5)  |
| B3  | B1  | B7  | 105.67(6) | B6 | B9  | B10 | 107.95(6) |
| B7  | B1  | B2  | 58.78(5)  | C2 | B10 | B3  | 58.63(5)  |
| B3  | B2  | B1  | 60.54(5)  | C2 | B10 | B4  | 106.01(6) |
| B3  | B2  | B4  | 59.95(5)  | C2 | B10 | B5  | 106.33(6) |
| B3  | B2  | B7  | 108.52(6) | C2 | B10 | B9  | 59.52(5)  |
| B3  | B2  | B8  | 107.98(6) | B3 | B10 | B5  | 108.09(6) |
| B4  | B2  | B1  | 108.90(6) | B3 | B10 | B9  | 107.37(6) |
| B7  | B2  | B1  | 60.55(5)  | B4 | B10 | B3  | 60.02(5)  |
| B7  | B2  | B4  | 108.29(6) | B4 | B10 | B5  | 60.40(5)  |
| B7  | B2  | B8  | 60.58(5)  | B4 | B10 | B9  | 107.73(6) |
| B8  | B2  | B1  | 109.30(6) | B5 | B10 | B9  | 59.57(5)  |
| B8  | B2  | B4  | 59.64(5)  |    |     |     |           |

---

**Hydrogen Atom Coordinates ( $\text{\AA}\times 10^4$ ) and Isotropic Displacement Parameters ( $\text{\AA}^2\times 10^3$ )  
for 0544\_CG\_0m.**

| Atom | x        | y         | z       | U(eq) |
|------|----------|-----------|---------|-------|
| H5   | 1757.48  | 5620.4    | 5518.81 | 20    |
| H6   | 1101.62  | 5167.86   | 4495.47 | 24    |
| H7   | 426.16   | 6805.57   | 3824.13 | 25    |
| H8   | 439.69   | 8909.68   | 4180.64 | 24    |
| H9   | 1127.96  | 9377.85   | 5194.95 | 20    |
| H10A | 7521.43  | 9346.87   | 5726.1  | 19    |
| H10B | 6234.07  | 9443.43   | 5273.87 | 19    |
| H11A | 7729.81  | 7954.75   | 4867.05 | 35    |
| H11B | 6399.88  | 7214.18   | 5079.16 | 35    |
| H11C | 7736.03  | 7168.88   | 5504.13 | 35    |
| H12A | 5802.23  | 8726.85   | 7038.19 | 18    |
| H12B | 7191.85  | 9195.8    | 6742.69 | 18    |
| H13A | 7784.33  | 7053.27   | 6532.13 | 31    |
| H13B | 6396.89  | 6586.71   | 6831.2  | 31    |
| H13C | 7529.57  | 7244.8    | 7259.29 | 31    |
| H15  | 4844.83  | 6147.12   | 5793.69 | 21    |
| H16  | 5927.34  | 4224.71   | 5610.54 | 22    |
| H18  | 3242.42  | 2425.81   | 6703.59 | 24    |
| H19  | 2193.99  | 4351.96   | 6910.38 | 21    |
| H20A | 4820.69  | 1244.24   | 5901.09 | 32    |
| H20B | 5858.35  | 1594.18   | 6450.54 | 32    |
| H20C | 6179.4   | 2004.35   | 5751.34 | 32    |
| H2   | 2010(13) | 6141(13)  | 7678(6) | 25(3) |
| H3   | 4479(12) | 7391(12)  | 7364(6) | 20(3) |
| H4   | 2466(14) | 8783(13)  | 8106(6) | 26(3) |
| H5A  | 1012(13) | 10514(13) | 7217(6) | 26(3) |
| H6A  | -281(12) | 8886(12)  | 6259(6) | 20(3) |
| H7A  | 292(13)  | 6263(12)  | 6524(6) | 21(3) |
| H8A  | -224(13) | 8031(12)  | 7604(6) | 24(3) |
| H9A  | 2292(12) | 10088(12) | 6002(6) | 20(3) |
| H10  | 3960(13) | 10055(13) | 7077(6) | 24(3) |

## Experimental

Single crystals of  $\text{C}_{20}\text{H}_{31}\text{B}_{10}\text{NO}$  [0544\_CG\_0m] were recrystallised from a mixture of Chloroform and hexane by slow evaporation. A suitable crystal was selected and the crystal was mounted on a MITIGEN holder oil on a 'Bruker APEX-II CCD' diffractometer. The crystal was kept at 100.02 K during data collection. Using Olex2<sup>[2]</sup>, the structure was solved with the XT<sup>[3]</sup> structure solution program using Intrinsic Phasing and refined with the XL<sup>[4]</sup> refinement package using Least Squares minimisation.

## Crystal structure determination of 4aa

**Crystal Data** for  $C_{20}H_{31}B_{10}NO$  ( $M = 409.56$  g/mol): monoclinic, space group  $P2_1/c$  (no. 14),  $a = 9.9001(6)$  Å,  $b = 10.5092(9)$  Å,  $c = 21.5172(15)$  Å,  $\beta = 90.643(3)^\circ$ ,  $V = 2238.6(3)$  Å<sup>3</sup>,  $Z = 4$ ,  $T = 100.02$  K,  $\mu(\text{MoK}\alpha) = 0.066$  mm<sup>-1</sup>,  $D_{\text{calc}} = 1.215$  g/cm<sup>3</sup>, 42852 reflections measured ( $4.314^\circ \leq 2\Theta \leq 61.04^\circ$ ), 6725 unique ( $R_{\text{int}} = 0.0241$ ,  $R_{\text{sigma}} = 0.0168$ ) which were used in all calculations. The final  $R_1$  was 0.0380 ( $I > 2\sigma(I)$ ) and  $wR_2$  was 0.1045 (all data).

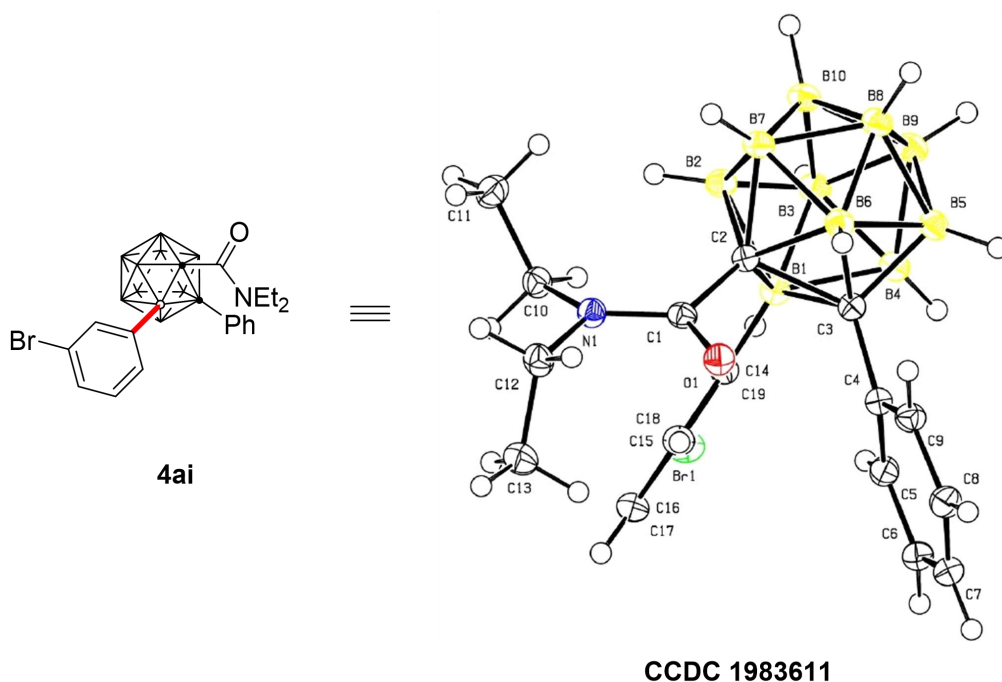

### Crystal data and structure refinement for 4ai.

|                       |                          |
|-----------------------|--------------------------|
| Identification code   | mo_0828_CG_0m            |
| CCDC number           | 1983611                  |
| Empirical formula     | $C_{19}H_{28}B_{10}BrNO$ |
| Formula weight        | 474.43                   |
| Temperature/K         | 100.0                    |
| Crystal system        | monoclinic               |
| Space group           | $P2_1/n$                 |
| $a/\text{Å}$          | 11.5021(12)              |
| $b/\text{Å}$          | 11.2242(12)              |
| $c/\text{Å}$          | 17.6391(19)              |
| $\alpha/^\circ$       | 90                       |
| $\beta/^\circ$        | 97.227(3)                |
| $\gamma/^\circ$       | 90                       |
| Volume/Å <sup>3</sup> | 2259.1(4)                |
| $Z$                   | 4                        |

|                                                |                                                               |
|------------------------------------------------|---------------------------------------------------------------|
| $\rho_{\text{calc}}/\text{cm}^3$               | 1.395                                                         |
| $\mu/\text{mm}^{-1}$                           | 1.833                                                         |
| F(000)                                         | 968.0                                                         |
| Crystal size/ $\text{mm}^3$                    | $0.3 \times 0.25 \times 0.25$                                 |
| Radiation                                      | MoK $\alpha$ ( $\lambda = 0.71073$ )                          |
| 2 $\Theta$ range for data collection/ $^\circ$ | 4.312 to 59.356                                               |
| Index ranges                                   | $-15 \leq h \leq 15, -15 \leq k \leq 15, -23 \leq l \leq 24$  |
| Reflections collected                          | 69892                                                         |
| Independent reflections                        | 6364 [ $R_{\text{int}} = 0.0329, R_{\text{sigma}} = 0.0179$ ] |
| Data/restraints/parameters                     | 6364/0/318                                                    |
| Goodness-of-fit on $F^2$                       | 1.055                                                         |
| Final R indexes [ $I \geq 2\sigma(I)$ ]        | $R_1 = 0.0276, wR_2 = 0.0735$                                 |
| Final R indexes [all data]                     | $R_1 = 0.0306, wR_2 = 0.0749$                                 |
| Largest diff. peak/hole / $e \text{ \AA}^{-3}$ | 0.84/-0.59                                                    |

**Fractional Atomic Coordinates ( $\times 10^4$ ) and Equivalent Isotropic Displacement Parameters ( $\text{\AA}^2 \times 10^3$ ) for mo\_0828\_CG\_0m.  $U_{\text{eq}}$  is defined as 1/3 of of the trace of the orthogonalised  $U_{\text{ij}}$  tensor.**

| Atom | $x$        | $y$        | $z$        | $U(\text{eq})$ |
|------|------------|------------|------------|----------------|
| Br1  | 5976.2(2)  | 2014.7(2)  | 3329.9(2)  | 22.78(5)       |
| O1   | 6018.8(9)  | 9339.2(10) | 3282.3(6)  | 20.6(2)        |
| N1   | 6859.0(11) | 8446.1(12) | 4355.0(7)  | 18.7(2)        |
| C1   | 5957.7(13) | 8630.1(13) | 3805.1(8)  | 17.1(3)        |
| C2   | 4753.3(13) | 8017.0(13) | 3822.6(8)  | 16.4(3)        |
| C3   | 3984.4(13) | 7749.4(13) | 2921.7(8)  | 17.1(3)        |
| C4   | 4469.8(13) | 7930.0(13) | 2171.0(8)  | 17.9(3)        |
| C5   | 4810.6(14) | 6951.1(14) | 1763.2(9)  | 20.4(3)        |
| C6   | 5146.6(14) | 7106.5(15) | 1037.4(9)  | 23.1(3)        |
| C7   | 5110.3(14) | 8222.3(16) | 702.9(9)   | 24.0(3)        |
| C8   | 4739.5(14) | 9194.7(15) | 1096.8(9)  | 23.5(3)        |
| C9   | 4428.7(14) | 9053.3(14) | 1827.4(9)  | 20.5(3)        |
| C10  | 7045.3(14) | 7465.7(14) | 4911.7(9)  | 21.0(3)        |
| C11  | 6865.0(16) | 7854.7(16) | 5711.2(9)  | 26.5(3)        |
| C12  | 7898.2(14) | 9211.6(15) | 4330.5(9)  | 22.7(3)        |
| C13  | 8777.5(15) | 8667.3(17) | 3853.6(10) | 28.4(3)        |
| C14  | 5516.6(13) | 5699.6(13) | 3378.0(8)  | 17.5(3)        |
| C15  | 6602.4(13) | 6092.6(14) | 3189.4(9)  | 19.5(3)        |
| C16  | 7491.5(14) | 5304.2(14) | 3086.5(9)  | 21.3(3)        |
| C17  | 7316.5(14) | 4081.6(14) | 3147.1(9)  | 20.6(3)        |
| C18  | 6236.4(14) | 3680.0(13) | 3310.4(8)  | 19.1(3)        |
| C19  | 5345.9(13) | 4466.5(13) | 3435.5(8)  | 18.4(3)        |
| B1   | 4486.7(15) | 6556.7(15) | 3532.0(10) | 17.8(3)        |
| B2   | 4281.1(15) | 7048.8(15) | 4477.1(10) | 19.1(3)        |

|     |            |            |            |         |
|-----|------------|------------|------------|---------|
| B3  | 3205.8(15) | 6149.4(16) | 3956.2(10) | 20.1(3) |
| B4  | 3049.1(15) | 6590.1(15) | 2987.0(10) | 19.2(3) |
| B5  | 2534.7(15) | 8090.3(16) | 2932.8(10) | 19.7(3) |
| B6  | 3644.1(15) | 8983.0(15) | 3439.9(10) | 18.3(3) |
| B7  | 3805.1(15) | 8550.3(16) | 4418.9(10) | 19.3(3) |
| B8  | 2396.3(15) | 8580.4(16) | 3869.1(10) | 20.1(3) |
| B9  | 2015.4(15) | 7088.3(16) | 3592.6(11) | 21.0(3) |
| B10 | 2789.9(15) | 7380.6(16) | 4507.6(10) | 20.6(3) |

**Anisotropic Displacement Parameters ( $\text{\AA}^2 \times 10^3$ ) for mo\_0828\_CG\_0m. The Anisotropic displacement factor exponent takes the form:  $-2\pi^2[h^2a^{*2}U_{11}+2hka^*b^*U_{12}+\dots]$ .**

| Atom | $U_{11}$ | $U_{22}$ | $U_{33}$ | $U_{23}$ | $U_{13}$ | $U_{12}$ |
|------|----------|----------|----------|----------|----------|----------|
| Br1  | 29.49(9) | 14.46(7) | 25.50(8) | 0.02(5)  | 7.82(6)  | 1.09(6)  |
| O1   | 21.4(5)  | 19.3(5)  | 21.1(5)  | 4.1(4)   | 2.5(4)   | -2.5(4)  |
| N1   | 18.0(6)  | 18.9(6)  | 19.2(6)  | 1.0(5)   | 1.6(5)   | -1.8(5)  |
| C1   | 17.3(6)  | 15.6(6)  | 18.9(6)  | -2.2(5)  | 4.5(5)   | -0.7(5)  |
| C2   | 17.1(6)  | 15.7(6)  | 16.6(6)  | -0.3(5)  | 2.6(5)   | -0.8(5)  |
| C3   | 17.5(6)  | 16.1(6)  | 17.7(6)  | -0.5(5)  | 2.2(5)   | -0.2(5)  |
| C4   | 16.7(6)  | 20.1(7)  | 16.9(6)  | -0.1(5)  | 1.9(5)   | 0.4(5)   |
| C5   | 21.0(7)  | 20.4(7)  | 19.5(7)  | -0.9(5)  | 1.7(5)   | 2.2(6)   |
| C6   | 22.8(7)  | 26.6(8)  | 20.1(7)  | -3.0(6)  | 3.4(6)   | 3.1(6)   |
| C7   | 21.3(7)  | 32.8(8)  | 18.2(7)  | 0.9(6)   | 3.5(6)   | 1.1(6)   |
| C8   | 24.7(7)  | 24.0(8)  | 21.9(7)  | 4.4(6)   | 3.6(6)   | 1.3(6)   |
| C9   | 21.0(7)  | 19.9(7)  | 20.7(7)  | 0.8(6)   | 3.7(5)   | 1.3(6)   |
| C10  | 20.1(7)  | 21.9(7)  | 20.6(7)  | 3.4(6)   | 1.8(5)   | 1.1(6)   |
| C11  | 27.5(8)  | 32.2(9)  | 19.8(7)  | 1.1(6)   | 2.6(6)   | -3.0(7)  |
| C12  | 18.8(7)  | 23.7(7)  | 25.2(7)  | 0.5(6)   | 1.3(6)   | -4.6(6)  |
| C13  | 21.5(7)  | 36.4(9)  | 28.3(8)  | 2.5(7)   | 6.4(6)   | -2.2(7)  |
| C14  | 18.7(6)  | 16.6(6)  | 17.3(6)  | 0.3(5)   | 2.7(5)   | 0.8(5)   |
| C15  | 21.3(7)  | 16.2(6)  | 21.4(7)  | 0.3(5)   | 4.5(5)   | -0.9(5)  |
| C16  | 20.5(7)  | 20.9(7)  | 23.3(7)  | 0.2(6)   | 5.8(6)   | -0.5(6)  |
| C17  | 22.1(7)  | 19.2(7)  | 20.7(7)  | 0.3(5)   | 4.0(5)   | 3.4(6)   |
| C18  | 25.5(7)  | 14.7(6)  | 17.4(6)  | -0.7(5)  | 3.5(5)   | 2.1(5)   |
| C19  | 19.2(7)  | 16.9(6)  | 19.5(6)  | 0.5(5)   | 4.3(5)   | 0.3(5)   |
| B1   | 18.5(7)  | 15.2(7)  | 20.2(7)  | 0.2(6)   | 3.9(6)   | -0.6(6)  |
| B2   | 20.0(7)  | 18.7(7)  | 19.3(7)  | 1.0(6)   | 4.9(6)   | -1.0(6)  |
| B3   | 19.7(8)  | 18.2(7)  | 23.3(8)  | 0.1(6)   | 5.4(6)   | -2.4(6)  |
| B4   | 18.3(7)  | 17.0(7)  | 22.6(8)  | -2.4(6)  | 3.3(6)   | -1.5(6)  |
| B5   | 17.4(7)  | 19.2(7)  | 22.3(8)  | -2.0(6)  | 2.1(6)   | 1.4(6)   |
| B6   | 18.6(7)  | 16.6(7)  | 19.8(7)  | -1.5(6)  | 2.5(6)   | 1.6(6)   |
| B7   | 19.8(7)  | 18.8(7)  | 20.0(7)  | -2.2(6)  | 5.8(6)   | -0.8(6)  |
| B8   | 18.4(7)  | 19.5(8)  | 22.9(8)  | -2.9(6)  | 4.8(6)   | 0.2(6)   |

|     |         |         |         |         |        |         |
|-----|---------|---------|---------|---------|--------|---------|
| B9  | 17.7(7) | 20.8(8) | 24.9(8) | -2.7(6) | 4.6(6) | -2.0(6) |
| B10 | 19.2(8) | 21.6(8) | 22.2(8) | -0.8(6) | 6.8(6) | -2.0(6) |

**Bond Lengths for mo\_0828\_CG\_0m.**

| Atom | Atom | Length/Å   | Atom | Atom | Length/Å |
|------|------|------------|------|------|----------|
| Br1  | C18  | 1.8940(15) | C14  | B1   | 1.576(2) |
| O1   | C1   | 1.2267(18) | C15  | C16  | 1.382(2) |
| N1   | C1   | 1.3437(19) | C16  | C17  | 1.393(2) |
| N1   | C10  | 1.472(2)   | C17  | C18  | 1.386(2) |
| N1   | C12  | 1.4771(19) | C18  | C19  | 1.391(2) |
| C1   | C2   | 1.551(2)   | B1   | B2   | 1.800(2) |
| C2   | C3   | 1.745(2)   | B1   | B3   | 1.794(2) |
| C2   | B1   | 1.733(2)   | B1   | B4   | 1.806(2) |
| C2   | B2   | 1.722(2)   | B2   | B3   | 1.763(2) |
| C2   | B6   | 1.744(2)   | B2   | B7   | 1.771(2) |
| C2   | B7   | 1.715(2)   | B2   | B10  | 1.763(2) |
| C3   | C4   | 1.514(2)   | B3   | B4   | 1.767(3) |
| C3   | B1   | 1.769(2)   | B3   | B9   | 1.782(3) |
| C3   | B4   | 1.701(2)   | B3   | B10  | 1.789(3) |
| C3   | B5   | 1.713(2)   | B4   | B5   | 1.783(2) |
| C3   | B6   | 1.731(2)   | B4   | B9   | 1.785(2) |
| C4   | C5   | 1.396(2)   | B5   | B6   | 1.773(2) |
| C4   | C9   | 1.397(2)   | B5   | B8   | 1.767(2) |
| C5   | C6   | 1.394(2)   | B5   | B9   | 1.775(3) |
| C6   | C7   | 1.383(2)   | B6   | B7   | 1.781(2) |
| C7   | C8   | 1.389(2)   | B6   | B8   | 1.764(2) |
| C8   | C9   | 1.389(2)   | B7   | B8   | 1.781(3) |
| C10  | C11  | 1.515(2)   | B7   | B10  | 1.777(3) |
| C12  | C13  | 1.522(2)   | B8   | B9   | 1.784(3) |
| C14  | C15  | 1.403(2)   | B8   | B10  | 1.777(3) |
| C14  | C19  | 1.403(2)   | B9   | B10  | 1.773(3) |

**Bond Angles for mo\_0828\_CG\_0m.**

| Atom | Atom | Atom | Angle/°    | Atom | Atom | Atom | Angle/°    |
|------|------|------|------------|------|------|------|------------|
| C1   | N1   | C10  | 129.10(13) | B2   | B3   | B1   | 60.80(10)  |
| C1   | N1   | C12  | 116.31(13) | B2   | B3   | B4   | 108.87(12) |
| C10  | N1   | C12  | 113.82(12) | B2   | B3   | B9   | 107.81(12) |
| O1   | C1   | N1   | 122.03(14) | B2   | B3   | B10  | 59.49(10)  |
| O1   | C1   | C2   | 116.02(13) | B4   | B3   | B1   | 60.93(10)  |
| N1   | C1   | C2   | 121.84(13) | B4   | B3   | B9   | 60.40(10)  |
| C1   | C2   | C3   | 114.20(11) | B4   | B3   | B10  | 107.94(12) |
| C1   | C2   | B1   | 122.62(12) | B9   | B3   | B1   | 109.47(12) |



|     |     |     |            |     |    |     |            |
|-----|-----|-----|------------|-----|----|-----|------------|
| C1  | C2  | B2  | 130.63(12) | B9  | B3 | B10 | 59.54(10)  |
| C1  | C2  | B6  | 109.16(11) | B10 | B3 | B1  | 108.64(12) |
| C1  | C2  | B7  | 119.73(12) | C3  | B4 | B1  | 60.49(9)   |
| B1  | C2  | C3  | 61.14(9)   | C3  | B4 | B3  | 106.93(12) |
| B1  | C2  | B6  | 112.33(11) | C3  | B4 | B5  | 58.84(9)   |
| B2  | C2  | C3  | 109.60(11) | C3  | B4 | B9  | 105.98(12) |
| B2  | C2  | B1  | 62.78(9)   | B3  | B4 | B1  | 60.26(10)  |
| B2  | C2  | B6  | 112.01(11) | B3  | B4 | B5  | 107.99(12) |
| B6  | C2  | C3  | 59.49(9)   | B3  | B4 | B9  | 60.22(10)  |
| B7  | C2  | C3  | 109.27(11) | B5  | B4 | B1  | 108.88(12) |
| B7  | C2  | B1  | 114.13(11) | B5  | B4 | B9  | 59.66(10)  |
| B7  | C2  | B2  | 62.01(10)  | B9  | B4 | B1  | 108.79(12) |
| B7  | C2  | B6  | 61.96(10)  | C3  | B5 | B4  | 58.19(9)   |
| C2  | C3  | B1  | 59.11(9)   | C3  | B5 | B6  | 59.50(9)   |
| C4  | C3  | C2  | 124.97(12) | C3  | B5 | B8  | 106.41(12) |
| C4  | C3  | B1  | 120.37(12) | C3  | B5 | B9  | 105.92(12) |
| C4  | C3  | B4  | 117.87(12) | B6  | B5 | B4  | 107.08(12) |
| C4  | C3  | B5  | 116.53(12) | B6  | B5 | B9  | 107.91(12) |
| C4  | C3  | B6  | 119.18(12) | B8  | B5 | B4  | 108.20(12) |
| B4  | C3  | C2  | 108.81(11) | B8  | B5 | B6  | 59.76(10)  |
| B4  | C3  | B1  | 62.67(10)  | B8  | B5 | B9  | 60.47(10)  |
| B4  | C3  | B5  | 62.96(10)  | B9  | B5 | B4  | 60.23(10)  |
| B4  | C3  | B6  | 112.90(12) | C2  | B6 | B5  | 106.79(11) |
| B5  | C3  | C2  | 109.49(11) | C2  | B6 | B7  | 58.23(9)   |
| B5  | C3  | B1  | 113.95(11) | C2  | B6 | B8  | 105.65(12) |
| B5  | C3  | B6  | 61.98(10)  | C3  | B6 | C2  | 60.27(9)   |
| B6  | C3  | C2  | 60.24(9)   | C3  | B6 | B5  | 58.52(9)   |
| B6  | C3  | B1  | 111.24(11) | C3  | B6 | B7  | 106.92(12) |
| C5  | C4  | C3  | 120.23(13) | C3  | B6 | B8  | 105.78(12) |
| C5  | C4  | C9  | 118.89(14) | B5  | B6 | B7  | 108.38(12) |
| C9  | C4  | C3  | 120.28(13) | B8  | B6 | B5  | 59.93(10)  |
| C6  | C5  | C4  | 120.19(15) | B8  | B6 | B7  | 60.32(10)  |
| C7  | C6  | C5  | 120.55(15) | C2  | B7 | B2  | 59.19(9)   |
| C6  | C7  | C8  | 119.52(15) | C2  | B7 | B6  | 59.81(9)   |
| C9  | C8  | C7  | 120.34(15) | C2  | B7 | B8  | 106.13(12) |
| C8  | C9  | C4  | 120.46(15) | C2  | B7 | B10 | 105.76(12) |
| N1  | C10 | C11 | 112.32(14) | B2  | B7 | B6  | 108.02(12) |
| N1  | C12 | C13 | 112.27(14) | B2  | B7 | B8  | 107.65(12) |
| C15 | C14 | B1  | 124.03(13) | B2  | B7 | B10 | 59.58(10)  |
| C19 | C14 | C15 | 117.63(14) | B6  | B7 | B8  | 59.36(10)  |
| C19 | C14 | B1  | 118.34(13) | B10 | B7 | B6  | 107.31(12) |
| C16 | C15 | C14 | 121.70(14) | B10 | B7 | B8  | 59.94(10)  |
| C15 | C16 | C17 | 120.29(15) | B5  | B8 | B7  | 108.68(12) |
| C18 | C17 | C16 | 118.58(14) | B5  | B8 | B9  | 59.99(10)  |
| C17 | C18 | Br1 | 118.21(11) | B5  | B8 | B10 | 108.10(12) |

|     |     |     |            |     |     |     |            |
|-----|-----|-----|------------|-----|-----|-----|------------|
| C17 | C18 | C19 | 121.60(14) | B6  | B8  | B5  | 60.31(10)  |
| C19 | C18 | Br1 | 120.16(12) | B6  | B8  | B7  | 60.32(10)  |
| C18 | C19 | C14 | 120.14(14) | B6  | B8  | B9  | 107.96(12) |
| C2  | B1  | C3  | 59.75(9)   | B6  | B8  | B10 | 108.06(12) |
| C2  | B1  | B2  | 58.32(9)   | B7  | B8  | B9  | 107.85(12) |
| C2  | B1  | B3  | 103.99(11) | B10 | B8  | B7  | 59.92(10)  |
| C2  | B1  | B4  | 104.71(11) | B10 | B8  | B9  | 59.74(10)  |
| C3  | B1  | B2  | 105.10(11) | B3  | B9  | B4  | 59.38(10)  |
| C3  | B1  | B3  | 102.96(11) | B3  | B9  | B8  | 107.80(12) |
| C3  | B1  | B4  | 56.84(9)   | B5  | B9  | B3  | 107.70(12) |
| C14 | B1  | C2  | 121.30(12) | B5  | B9  | B4  | 60.12(10)  |
| C14 | B1  | C3  | 123.52(12) | B5  | B9  | B8  | 59.54(10)  |
| C14 | B1  | B2  | 122.43(13) | B8  | B9  | B4  | 107.37(12) |
| C14 | B1  | B3  | 126.23(13) | B10 | B9  | B3  | 60.43(10)  |
| C14 | B1  | B4  | 125.36(13) | B10 | B9  | B4  | 107.84(12) |
| B2  | B1  | B4  | 105.58(12) | B10 | B9  | B5  | 107.91(12) |
| B3  | B1  | B2  | 58.75(10)  | B10 | B9  | B8  | 59.96(10)  |
| B3  | B1  | B4  | 58.81(10)  | B2  | B10 | B3  | 59.50(10)  |
| C2  | B2  | B1  | 58.90(9)   | B2  | B10 | B7  | 60.04(10)  |
| C2  | B2  | B3  | 105.76(12) | B2  | B10 | B8  | 108.18(12) |
| C2  | B2  | B7  | 58.80(9)   | B2  | B10 | B9  | 108.21(12) |
| C2  | B2  | B10 | 106.10(12) | B7  | B10 | B3  | 107.41(12) |
| B3  | B2  | B1  | 60.45(10)  | B7  | B10 | B8  | 60.15(10)  |
| B3  | B2  | B7  | 108.86(12) | B8  | B10 | B3  | 107.76(12) |
| B7  | B2  | B1  | 108.30(12) | B9  | B10 | B3  | 60.03(10)  |
| B10 | B2  | B1  | 109.56(12) | B9  | B10 | B7  | 108.48(12) |
| B10 | B2  | B3  | 61.00(10)  | B9  | B10 | B8  | 60.31(10)  |
| B10 | B2  | B7  | 60.38(10)  |     |     |     |            |

**Torsion Angles for mo\_0828\_CG\_0m.**

| A   | B   | C   | D   | Angle/°     | A  | B  | C  | D   | Angle/°     |
|-----|-----|-----|-----|-------------|----|----|----|-----|-------------|
| Br1 | C18 | C19 | C14 | -176.36(11) | B2 | C2 | B6 | C3  | -100.48(12) |
| O1  | C1  | C2  | C3  | 33.64(17)   | B2 | C2 | B6 | B5  | -63.64(14)  |
| O1  | C1  | C2  | B1  | 103.72(16)  | B2 | C2 | B6 | B7  | 37.94(12)   |
| O1  | C1  | C2  | B2  | -175.86(14) | B2 | C2 | B6 | B8  | -0.96(15)   |
| O1  | C1  | C2  | B6  | -30.70(17)  | B2 | C2 | B7 | B6  | -139.80(12) |
| O1  | C1  | C2  | B7  | -98.69(16)  | B2 | C2 | B7 | B8  | -101.24(13) |
| N1  | C1  | C2  | C3  | -150.06(13) | B2 | C2 | B7 | B10 | -38.64(11)  |
| N1  | C1  | C2  | B1  | -79.98(18)  | B2 | B1 | B3 | B4  | 137.27(12)  |
| N1  | C1  | C2  | B2  | 0.4(2)      | B2 | B1 | B3 | B9  | 100.02(13)  |
| N1  | C1  | C2  | B6  | 145.61(13)  | B2 | B1 | B3 | B10 | 36.65(12)   |
| N1  | C1  | C2  | B7  | 77.61(18)   | B2 | B1 | B4 | C3  | 98.10(12)   |
| C1  | N1  | C10 | C11 | -106.55(18) | B2 | B1 | B4 | B3  | -37.03(11)  |

|    |    |     |     |             |    |    |     |     |             |
|----|----|-----|-----|-------------|----|----|-----|-----|-------------|
| C1 | N1 | C12 | C13 | -90.05(17)  | B2 | B1 | B4  | B5  | 63.38(14)   |
| C1 | C2 | C3  | C4  | 7.80(19)    | B2 | B1 | B4  | B9  | -0.03(15)   |
| C1 | C2 | C3  | B1  | 115.28(13)  | B2 | B3 | B4  | C3  | -1.17(16)   |
| C1 | C2 | C3  | B4  | 155.02(12)  | B2 | B3 | B4  | B1  | 38.75(11)   |
| C1 | C2 | C3  | B5  | -137.86(12) | B2 | B3 | B4  | B5  | -63.15(15)  |
| C1 | C2 | C3  | B6  | -98.78(13)  | B2 | B3 | B4  | B9  | -100.23(13) |
| C1 | C2 | B1  | C3  | -101.71(14) | B2 | B3 | B9  | B4  | 102.02(13)  |
| C1 | C2 | B1  | C14 | 11.5(2)     | B2 | B3 | B9  | B5  | 64.81(15)   |
| C1 | C2 | B1  | B2  | 122.70(15)  | B2 | B3 | B9  | B8  | 1.97(16)    |
| C1 | C2 | B1  | B3  | 161.26(13)  | B2 | B3 | B9  | B10 | -36.15(11)  |
| C1 | C2 | B1  | B4  | -137.84(13) | B2 | B3 | B10 | B7  | 37.63(12)   |
| C1 | C2 | B2  | B1  | -110.94(16) | B2 | B3 | B10 | B8  | 101.05(13)  |
| C1 | C2 | B2  | B3  | -150.70(14) | B2 | B3 | B10 | B9  | 139.32(13)  |
| C1 | C2 | B2  | B7  | 106.49(16)  | B2 | B7 | B8  | B5  | -63.50(15)  |
| C1 | C2 | B2  | B10 | 145.59(14)  | B2 | B7 | B8  | B6  | -100.89(13) |
| C1 | C2 | B6  | C3  | 107.40(12)  | B2 | B7 | B8  | B9  | 0.02(16)    |
| C1 | C2 | B6  | B5  | 144.24(12)  | B2 | B7 | B8  | B10 | 37.05(11)   |
| C1 | C2 | B6  | B7  | -114.19(13) | B2 | B7 | B10 | B3  | -37.39(12)  |
| C1 | C2 | B6  | B8  | -153.08(12) | B2 | B7 | B10 | B8  | -138.25(12) |
| C1 | C2 | B7  | B2  | -123.08(14) | B2 | B7 | B10 | B9  | -100.82(13) |
| C1 | C2 | B7  | B6  | 97.13(14)   | B3 | B1 | B2  | C2  | -134.97(12) |
| C1 | C2 | B7  | B8  | 135.68(13)  | B3 | B1 | B2  | B7  | -101.76(13) |
| C1 | C2 | B7  | B10 | -161.72(13) | B3 | B1 | B2  | B10 | -37.54(12)  |
| C2 | C3 | C4  | C5  | 104.15(17)  | B3 | B1 | B4  | C3  | 135.13(12)  |
| C2 | C3 | C4  | C9  | -84.84(18)  | B3 | B1 | B4  | B5  | 100.40(13)  |
| C2 | C3 | B1  | C14 | -109.58(15) | B3 | B1 | B4  | B9  | 37.00(12)   |
| C2 | C3 | B1  | B2  | 38.09(10)   | B3 | B2 | B7  | C2  | -97.40(13)  |
| C2 | C3 | B1  | B3  | 98.80(12)   | B3 | B2 | B7  | B6  | -61.47(15)  |
| C2 | C3 | B1  | B4  | 137.06(12)  | B3 | B2 | B7  | B8  | 1.21(16)    |
| C2 | C3 | B4  | B1  | -38.14(10)  | B3 | B2 | B7  | B10 | 38.42(12)   |
| C2 | C3 | B4  | B3  | 1.68(15)    | B3 | B2 | B10 | B7  | -137.75(13) |
| C2 | C3 | B4  | B5  | 102.82(12)  | B3 | B2 | B10 | B8  | -100.32(13) |
| C2 | C3 | B4  | B9  | 64.75(14)   | B3 | B2 | B10 | B9  | -36.47(12)  |
| C2 | C3 | B5  | B4  | -101.73(12) | B3 | B4 | B5  | C3  | 99.29(13)   |
| C2 | C3 | B5  | B6  | 38.30(11)   | B3 | B4 | B5  | B6  | 63.91(15)   |
| C2 | C3 | B5  | B8  | -0.17(15)   | B3 | B4 | B5  | B8  | 0.89(16)    |
| C2 | C3 | B5  | B9  | -63.41(14)  | B3 | B4 | B5  | B9  | -37.32(11)  |
| C2 | C3 | B6  | B5  | -137.70(12) | B3 | B4 | B9  | B5  | 138.36(12)  |
| C2 | C3 | B6  | B7  | -36.14(10)  | B3 | B4 | B9  | B8  | 100.78(13)  |
| C2 | C3 | B6  | B8  | -99.28(12)  | B3 | B4 | B9  | B10 | 37.55(12)   |
| C2 | B1 | B2  | B3  | 134.97(12)  | B3 | B9 | B10 | B2  | 36.25(12)   |
| C2 | B1 | B2  | B7  | 33.21(11)   | B3 | B9 | B10 | B7  | 99.87(13)   |
| C2 | B1 | B2  | B10 | 97.43(13)   | B3 | B9 | B10 | B8  | 137.23(12)  |
| C2 | B1 | B3  | B2  | -38.35(11)  | B4 | C3 | C4  | C5  | -40.4(2)    |
| C2 | B1 | B3  | B4  | 98.92(12)   | B4 | C3 | C4  | C9  | 130.59(15)  |

|    |    |     |     |             |    |    |     |     |             |
|----|----|-----|-----|-------------|----|----|-----|-----|-------------|
| C2 | B1 | B3  | B9  | 61.67(14)   | B4 | C3 | B1  | C2  | -137.06(12) |
| C2 | B1 | B3  | B10 | -1.70(15)   | B4 | C3 | B1  | C14 | 113.36(16)  |
| C2 | B1 | B4  | C3  | 37.48(10)   | B4 | C3 | B1  | B2  | -98.98(12)  |
| C2 | B1 | B4  | B3  | -97.66(12)  | B4 | C3 | B1  | B3  | -38.26(11)  |
| C2 | B1 | B4  | B5  | 2.75(15)    | B4 | C3 | B5  | B6  | 140.04(12)  |
| C2 | B1 | B4  | B9  | -60.66(14)  | B4 | C3 | B5  | B8  | 101.56(13)  |
| C2 | B2 | B3  | B1  | 39.01(11)   | B4 | C3 | B5  | B9  | 38.32(11)   |
| C2 | B2 | B3  | B4  | 0.20(16)    | B4 | C3 | B6  | C2  | 99.30(12)   |
| C2 | B2 | B3  | B9  | -63.79(14)  | B4 | C3 | B6  | B5  | -38.39(12)  |
| C2 | B2 | B3  | B10 | -99.96(13)  | B4 | C3 | B6  | B7  | 63.16(15)   |
| C2 | B2 | B7  | B6  | 35.93(11)   | B4 | C3 | B6  | B8  | 0.02(16)    |
| C2 | B2 | B7  | B8  | 98.61(12)   | B4 | B1 | B2  | C2  | -97.91(12)  |
| C2 | B2 | B7  | B10 | 135.82(12)  | B4 | B1 | B2  | B3  | 37.05(11)   |
| C2 | B2 | B10 | B3  | 99.40(13)   | B4 | B1 | B2  | B7  | -64.71(14)  |
| C2 | B2 | B10 | B7  | -38.35(11)  | B4 | B1 | B2  | B10 | -0.49(15)   |
| C2 | B2 | B10 | B8  | -0.92(16)   | B4 | B1 | B3  | B2  | -137.27(12) |
| C2 | B2 | B10 | B9  | 62.92(15)   | B4 | B1 | B3  | B9  | -37.25(12)  |
| C2 | B6 | B7  | B2  | -35.66(11)  | B4 | B1 | B3  | B10 | -100.62(13) |
| C2 | B6 | B7  | B8  | -135.90(12) | B4 | B3 | B9  | B5  | -37.21(11)  |
| C2 | B6 | B7  | B10 | -98.51(13)  | B4 | B3 | B9  | B8  | -100.05(13) |
| C2 | B6 | B8  | B5  | -100.63(12) | B4 | B3 | B9  | B10 | -138.17(12) |
| C2 | B6 | B8  | B7  | 37.91(11)   | B4 | B3 | B10 | B2  | -101.76(13) |
| C2 | B6 | B8  | B9  | -62.82(14)  | B4 | B3 | B10 | B7  | -64.14(15)  |
| C2 | B6 | B8  | B10 | 0.34(15)    | B4 | B3 | B10 | B8  | -0.71(16)   |
| C2 | B7 | B8  | B5  | -1.38(16)   | B4 | B3 | B10 | B9  | 37.55(11)   |
| C2 | B7 | B8  | B6  | -38.77(11)  | B4 | B5 | B6  | C2  | -2.80(15)   |
| C2 | B7 | B8  | B9  | 62.15(15)   | B4 | B5 | B6  | C3  | 34.82(11)   |
| C2 | B7 | B8  | B10 | 99.17(13)   | B4 | B5 | B6  | B7  | -64.16(15)  |
| C2 | B7 | B10 | B2  | 38.46(11)   | B4 | B5 | B6  | B8  | -101.48(13) |
| C2 | B7 | B10 | B3  | 1.07(16)    | B4 | B5 | B8  | B6  | 99.57(13)   |
| C2 | B7 | B10 | B8  | -99.79(13)  | B4 | B5 | B8  | B7  | 62.17(15)   |
| C2 | B7 | B10 | B9  | -62.36(15)  | B4 | B5 | B8  | B9  | -38.10(11)  |
| C3 | C2 | B1  | C14 | 113.18(15)  | B4 | B5 | B8  | B10 | -1.33(16)   |
| C3 | C2 | B1  | B2  | -135.59(11) | B4 | B5 | B9  | B3  | 36.88(11)   |
| C3 | C2 | B1  | B3  | -97.02(12)  | B4 | B5 | B9  | B8  | 137.52(13)  |
| C3 | C2 | B1  | B4  | -36.13(10)  | B4 | B5 | B9  | B10 | 100.70(13)  |
| C3 | C2 | B2  | B1  | 40.59(11)   | B4 | B9 | B10 | B2  | -0.83(16)   |
| C3 | C2 | B2  | B3  | 0.83(15)    | B4 | B9 | B10 | B3  | -37.08(11)  |
| C3 | C2 | B2  | B7  | -101.98(12) | B4 | B9 | B10 | B7  | 62.79(15)   |
| C3 | C2 | B2  | B10 | -62.88(14)  | B4 | B9 | B10 | B8  | 100.15(13)  |
| C3 | C2 | B6  | B5  | 36.84(10)   | B5 | C3 | C4  | C5  | -112.32(16) |
| C3 | C2 | B6  | B7  | 138.41(12)  | B5 | C3 | C4  | C9  | 58.69(19)   |
| C3 | C2 | B6  | B8  | 99.52(12)   | B5 | C3 | B1  | C2  | -99.19(12)  |
| C3 | C2 | B7  | B2  | 102.51(12)  | B5 | C3 | B1  | C14 | 151.23(14)  |
| C3 | C2 | B7  | B6  | -37.28(11)  | B5 | C3 | B1  | B2  | -61.10(14)  |

|    |    |    |     |             |    |    |     |     |             |
|----|----|----|-----|-------------|----|----|-----|-----|-------------|
| C3 | C2 | B7 | B8  | 1.27(15)    | B5 | C3 | B1  | B3  | -0.39(15)   |
| C3 | C2 | B7 | B10 | 63.87(14)   | B5 | C3 | B1  | B4  | 37.87(12)   |
| C3 | C4 | C5 | C6  | 173.58(14)  | B5 | C3 | B4  | B1  | -140.96(12) |
| C3 | C4 | C9 | C8  | -172.10(14) | B5 | C3 | B4  | B3  | -101.15(13) |
| C3 | B1 | B2 | C2  | -38.77(10)  | B5 | C3 | B4  | B9  | -38.08(11)  |
| C3 | B1 | B2 | B3  | 96.20(12)   | B5 | C3 | B6  | C2  | 137.70(12)  |
| C3 | B1 | B2 | B7  | -5.56(15)   | B5 | C3 | B6  | B7  | 101.55(13)  |
| C3 | B1 | B2 | B10 | 58.66(14)   | B5 | C3 | B6  | B8  | 38.41(11)   |
| C3 | B1 | B3 | B2  | -99.97(12)  | B5 | B4 | B9  | B3  | -138.36(12) |
| C3 | B1 | B3 | B4  | 37.30(10)   | B5 | B4 | B9  | B8  | -37.58(12)  |
| C3 | B1 | B3 | B9  | 0.05(15)    | B5 | B4 | B9  | B10 | -100.82(13) |
| C3 | B1 | B3 | B10 | -63.32(14)  | B5 | B6 | B7  | C2  | 98.75(12)   |
| C3 | B1 | B4 | B3  | -135.13(12) | B5 | B6 | B7  | B2  | 63.09(15)   |
| C3 | B1 | B4 | B5  | -34.73(11)  | B5 | B6 | B7  | B8  | -37.15(11)  |
| C3 | B1 | B4 | B9  | -98.14(13)  | B5 | B6 | B7  | B10 | 0.24(16)    |
| C3 | B4 | B5 | B6  | -35.38(11)  | B5 | B6 | B8  | B7  | 138.53(12)  |
| C3 | B4 | B5 | B8  | -98.40(13)  | B5 | B6 | B8  | B9  | 37.81(12)   |
| C3 | B4 | B5 | B9  | -136.61(12) | B5 | B6 | B8  | B10 | 100.97(13)  |
| C3 | B4 | B9 | B3  | -100.67(13) | B5 | B8 | B9  | B3  | 100.46(13)  |
| C3 | B4 | B9 | B5  | 37.70(11)   | B5 | B8 | B9  | B4  | 37.85(12)   |
| C3 | B4 | B9 | B8  | 0.11(16)    | B5 | B8 | B9  | B10 | 138.80(13)  |
| C3 | B4 | B9 | B10 | -63.12(15)  | B5 | B8 | B10 | B2  | 64.15(15)   |
| C3 | B5 | B6 | C2  | -37.63(11)  | B5 | B8 | B10 | B3  | 1.26(16)    |
| C3 | B5 | B6 | B7  | -98.98(12)  | B5 | B8 | B10 | B7  | 101.54(13)  |
| C3 | B5 | B6 | B8  | -136.30(12) | B5 | B8 | B10 | B9  | -36.88(11)  |
| C3 | B5 | B8 | B6  | 38.35(11)   | B5 | B9 | B10 | B2  | -64.35(15)  |
| C3 | B5 | B8 | B7  | 0.96(16)    | B5 | B9 | B10 | B3  | -100.60(13) |
| C3 | B5 | B8 | B9  | -99.31(13)  | B5 | B9 | B10 | B7  | -0.73(16)   |
| C3 | B5 | B8 | B10 | -62.54(15)  | B5 | B9 | B10 | B8  | 36.64(11)   |
| C3 | B5 | B9 | B3  | -0.50(16)   | B6 | C2 | C3  | C4  | 106.59(15)  |
| C3 | B5 | B9 | B4  | -37.38(11)  | B6 | C2 | C3  | B1  | -145.93(12) |
| C3 | B5 | B9 | B8  | 100.14(13)  | B6 | C2 | C3  | B4  | -106.19(13) |
| C3 | B5 | B9 | B10 | 63.32(15)   | B6 | C2 | C3  | B5  | -39.07(11)  |
| C3 | B6 | B7 | C2  | 37.05(10)   | B6 | C2 | B1  | C3  | 31.45(11)   |
| C3 | B6 | B7 | B2  | 1.39(15)    | B6 | C2 | B1  | C14 | 144.62(13)  |
| C3 | B6 | B7 | B8  | -98.85(13)  | B6 | C2 | B1  | B2  | -104.14(13) |
| C3 | B6 | B7 | B10 | -61.46(14)  | B6 | C2 | B1  | B3  | -65.58(14)  |
| C3 | B6 | B8 | B5  | -37.76(11)  | B6 | C2 | B1  | B4  | -4.68(15)   |
| C3 | B6 | B8 | B7  | 100.78(12)  | B6 | C2 | B2  | B1  | 104.65(12)  |
| C3 | B6 | B8 | B9  | 0.06(16)    | B6 | C2 | B2  | B3  | 64.90(14)   |
| C3 | B6 | B8 | B10 | 63.21(14)   | B6 | C2 | B2  | B7  | -37.91(11)  |
| C4 | C3 | B1 | C2  | 115.06(14)  | B6 | C2 | B2  | B10 | 1.18(15)    |
| C4 | C3 | B1 | C14 | 5.5(2)      | B6 | C2 | B7  | B2  | 139.80(12)  |
| C4 | C3 | B1 | B2  | 153.15(13)  | B6 | C2 | B7  | B8  | 38.56(11)   |
| C4 | C3 | B1 | B3  | -146.14(13) | B6 | C2 | B7  | B10 | 101.15(13)  |

|     |     |     |     |             |    |    |     |     |             |
|-----|-----|-----|-----|-------------|----|----|-----|-----|-------------|
| C4  | C3  | B1  | B4  | -107.88(15) | B6 | C3 | C4  | C5  | 176.50(13)  |
| C4  | C3  | B4  | B1  | 111.74(14)  | B6 | C3 | C4  | C9  | -12.5(2)    |
| C4  | C3  | B4  | B3  | 151.56(13)  | B6 | C3 | B1  | C2  | -31.45(11)  |
| C4  | C3  | B4  | B5  | -107.30(14) | B6 | C3 | B1  | C14 | -141.03(14) |
| C4  | C3  | B4  | B9  | -145.37(13) | B6 | C3 | B1  | B2  | 6.64(15)    |
| C4  | C3  | B5  | B4  | 109.38(14)  | B6 | C3 | B1  | B3  | 67.35(14)   |
| C4  | C3  | B5  | B6  | -110.59(14) | B6 | C3 | B1  | B4  | 105.61(13)  |
| C4  | C3  | B5  | B8  | -149.06(13) | B6 | C3 | B4  | B1  | -102.97(13) |
| C4  | C3  | B5  | B9  | 147.70(13)  | B6 | C3 | B4  | B3  | -63.15(15)  |
| C4  | C3  | B6  | C2  | -115.91(14) | B6 | C3 | B4  | B5  | 37.99(12)   |
| C4  | C3  | B6  | B5  | 106.40(14)  | B6 | C3 | B4  | B9  | -0.08(16)   |
| C4  | C3  | B6  | B7  | -152.05(13) | B6 | C3 | B5  | B4  | -140.04(12) |
| C4  | C3  | B6  | B8  | 144.81(13)  | B6 | C3 | B5  | B8  | -38.48(11)  |
| C4  | C5  | C6  | C7  | -2.1(2)     | B6 | C3 | B5  | B9  | -101.71(13) |
| C5  | C4  | C9  | C8  | -1.0(2)     | B6 | B5 | B8  | B7  | -37.39(11)  |
| C5  | C6  | C7  | C8  | 0.2(2)      | B6 | B5 | B8  | B9  | -137.67(12) |
| C6  | C7  | C8  | C9  | 1.2(2)      | B6 | B5 | B8  | B10 | -100.90(13) |
| C7  | C8  | C9  | C4  | -0.9(2)     | B6 | B5 | B9  | B3  | -62.95(15)  |
| C9  | C4  | C5  | C6  | 2.4(2)      | B6 | B5 | B9  | B4  | -99.83(13)  |
| C10 | N1  | C1  | O1  | -164.61(15) | B6 | B5 | B9  | B8  | 37.69(11)   |
| C10 | N1  | C1  | C2  | 19.3(2)     | B6 | B5 | B9  | B10 | 0.87(16)    |
| C10 | N1  | C12 | C13 | 80.79(17)   | B6 | B7 | B8  | B5  | 37.39(12)   |
| C12 | N1  | C1  | O1  | 4.6(2)      | B6 | B7 | B8  | B9  | 100.92(13)  |
| C12 | N1  | C1  | C2  | -171.51(13) | B6 | B7 | B8  | B10 | 137.94(12)  |
| C12 | N1  | C10 | C11 | 84.05(16)   | B6 | B7 | B10 | B2  | 101.12(13)  |
| C14 | C15 | C16 | C17 | 1.9(2)      | B6 | B7 | B10 | B3  | 63.73(15)   |
| C14 | B1  | B2  | C2  | 109.34(15)  | B6 | B7 | B10 | B8  | -37.14(11)  |
| C14 | B1  | B2  | B3  | -115.69(16) | B6 | B7 | B10 | B9  | 0.30(16)    |
| C14 | B1  | B2  | B7  | 142.55(14)  | B6 | B8 | B9  | B3  | 62.51(15)   |
| C14 | B1  | B2  | B10 | -153.23(14) | B6 | B8 | B9  | B4  | -0.11(16)   |
| C14 | B1  | B3  | B2  | 109.45(17)  | B6 | B8 | B9  | B5  | -37.95(11)  |
| C14 | B1  | B3  | B4  | -113.27(17) | B6 | B8 | B9  | B10 | 100.84(13)  |
| C14 | B1  | B3  | B9  | -150.53(14) | B6 | B8 | B10 | B2  | 0.36(16)    |
| C14 | B1  | B3  | B10 | 146.10(14)  | B6 | B8 | B10 | B3  | -62.53(15)  |
| C14 | B1  | B4  | C3  | -110.19(16) | B6 | B8 | B10 | B7  | 37.75(11)   |
| C14 | B1  | B4  | B3  | 114.68(16)  | B6 | B8 | B10 | B9  | -100.68(13) |
| C14 | B1  | B4  | B5  | -144.92(14) | B7 | C2 | C3  | C4  | 144.95(14)  |
| C14 | B1  | B4  | B9  | 151.67(14)  | B7 | C2 | C3  | B1  | -107.57(12) |
| C15 | C14 | C19 | C18 | 0.3(2)      | B7 | C2 | C3  | B4  | -67.83(14)  |
| C15 | C14 | B1  | C2  | -23.9(2)    | B7 | C2 | C3  | B5  | -0.71(15)   |
| C15 | C14 | B1  | C3  | 48.4(2)     | B7 | C2 | C3  | B6  | 38.36(11)   |
| C15 | C14 | B1  | B2  | -93.90(18)  | B7 | C2 | B1  | C3  | 99.56(12)   |
| C15 | C14 | B1  | B3  | -166.66(15) | B7 | C2 | B1  | C14 | -147.27(13) |
| C15 | C14 | B1  | B4  | 118.85(17)  | B7 | C2 | B1  | B2  | -36.03(12)  |
| C15 | C16 | C17 | C18 | 0.1(2)      | B7 | C2 | B1  | B3  | 2.53(16)    |

|     |     |     |     |             |    |    |     |     |             |
|-----|-----|-----|-----|-------------|----|----|-----|-----|-------------|
| C16 | C17 | C18 | Br1 | 176.21(12)  | B7 | C2 | B1  | B4  | 63.43(14)   |
| C16 | C17 | C18 | C19 | -1.9(2)     | B7 | C2 | B2  | B1  | 142.56(12)  |
| C17 | C18 | C19 | C14 | 1.7(2)      | B7 | C2 | B2  | B3  | 102.81(13)  |
| C19 | C14 | C15 | C16 | -2.0(2)     | B7 | C2 | B2  | B10 | 39.09(11)   |
| C19 | C14 | B1  | C2  | 155.79(13)  | B7 | C2 | B6  | C3  | -138.41(12) |
| C19 | C14 | B1  | C3  | -131.94(15) | B7 | C2 | B6  | B5  | -101.57(13) |
| C19 | C14 | B1  | B2  | 85.78(18)   | B7 | C2 | B6  | B8  | -38.90(11)  |
| C19 | C14 | B1  | B3  | 13.0(2)     | B7 | B2 | B3  | B1  | 100.82(13)  |
| C19 | C14 | B1  | B4  | -61.5(2)    | B7 | B2 | B3  | B4  | 62.01(15)   |
| B1  | C2  | C3  | C4  | -107.48(15) | B7 | B2 | B3  | B9  | -1.98(16)   |
| B1  | C2  | C3  | B4  | 39.74(11)   | B7 | B2 | B3  | B10 | -38.15(12)  |
| B1  | C2  | C3  | B5  | 106.86(12)  | B7 | B2 | B10 | B3  | 137.75(13)  |
| B1  | C2  | C3  | B6  | 145.93(12)  | B7 | B2 | B10 | B8  | 37.43(12)   |
| B1  | C2  | B2  | B3  | -39.75(11)  | B7 | B2 | B10 | B9  | 101.28(13)  |
| B1  | C2  | B2  | B7  | -142.56(12) | B7 | B6 | B8  | B5  | -138.53(12) |
| B1  | C2  | B2  | B10 | -103.47(13) | B7 | B6 | B8  | B9  | -100.72(13) |
| B1  | C2  | B6  | C3  | -32.03(11)  | B7 | B6 | B8  | B10 | -37.57(12)  |
| B1  | C2  | B6  | B5  | 4.81(15)    | B7 | B8 | B9  | B3  | -1.23(16)   |
| B1  | C2  | B6  | B7  | 106.38(13)  | B7 | B8 | B9  | B4  | -63.84(15)  |
| B1  | C2  | B6  | B8  | 67.49(14)   | B7 | B8 | B9  | B5  | -101.69(13) |
| B1  | C2  | B7  | B2  | 36.32(12)   | B7 | B8 | B9  | B10 | 37.11(11)   |
| B1  | C2  | B7  | B6  | -103.48(13) | B7 | B8 | B10 | B2  | -37.39(11)  |
| B1  | C2  | B7  | B8  | -64.92(15)  | B7 | B8 | B10 | B3  | -100.28(13) |
| B1  | C2  | B7  | B10 | -2.32(16)   | B7 | B8 | B10 | B9  | -138.42(12) |
| B1  | C3  | C4  | C5  | 32.6(2)     | B8 | B5 | B6  | C2  | 98.68(13)   |
| B1  | C3  | C4  | C9  | -156.40(14) | B8 | B5 | B6  | C3  | 136.30(12)  |
| B1  | C3  | B4  | B3  | 39.81(11)   | B8 | B5 | B6  | B7  | 37.32(11)   |
| B1  | C3  | B4  | B5  | 140.96(12)  | B8 | B5 | B9  | B3  | -100.64(13) |
| B1  | C3  | B4  | B9  | 102.88(13)  | B8 | B5 | B9  | B4  | -137.52(13) |
| B1  | C3  | B5  | B4  | -37.75(12)  | B8 | B5 | B9  | B10 | -36.82(12)  |
| B1  | C3  | B5  | B6  | 102.28(13)  | B8 | B6 | B7  | C2  | 135.90(12)  |
| B1  | C3  | B5  | B8  | 63.80(15)   | B8 | B6 | B7  | B2  | 100.24(13)  |
| B1  | C3  | B5  | B9  | 0.57(16)    | B8 | B6 | B7  | B10 | 37.39(11)   |
| B1  | C3  | B6  | C2  | 31.05(11)   | B8 | B7 | B10 | B2  | 138.25(12)  |
| B1  | C3  | B6  | B5  | -106.65(13) | B8 | B7 | B10 | B3  | 100.87(13)  |
| B1  | C3  | B6  | B7  | -5.09(15)   | B8 | B7 | B10 | B9  | 37.43(12)   |
| B1  | C3  | B6  | B8  | -68.23(14)  | B8 | B9 | B10 | B2  | -100.98(13) |
| B1  | C14 | C15 | C16 | 177.66(14)  | B8 | B9 | B10 | B3  | -137.23(12) |
| B1  | C14 | C19 | C18 | -179.44(13) | B8 | B9 | B10 | B7  | -37.36(12)  |
| B1  | B2  | B3  | B4  | -38.81(11)  | B9 | B3 | B4  | C3  | 99.05(13)   |
| B1  | B2  | B3  | B9  | -102.80(13) | B9 | B3 | B4  | B1  | 138.98(12)  |
| B1  | B2  | B3  | B10 | -138.97(13) | B9 | B3 | B4  | B5  | 37.07(11)   |
| B1  | B2  | B7  | C2  | -33.25(11)  | B9 | B3 | B10 | B2  | -139.32(13) |
| B1  | B2  | B7  | B6  | 2.68(16)    | B9 | B3 | B10 | B7  | -101.69(13) |
| B1  | B2  | B7  | B8  | 65.36(14)   | B9 | B3 | B10 | B8  | -38.27(11)  |

|    |    |     |     |             |     |    |     |     |             |
|----|----|-----|-----|-------------|-----|----|-----|-----|-------------|
| B1 | B2 | B7  | B10 | 102.57(13)  | B9  | B4 | B5  | C3  | 136.61(12)  |
| B1 | B2 | B10 | B3  | 37.30(12)   | B9  | B4 | B5  | B6  | 101.23(13)  |
| B1 | B2 | B10 | B7  | -100.45(13) | B9  | B4 | B5  | B8  | 38.21(12)   |
| B1 | B2 | B10 | B8  | -63.02(15)  | B9  | B5 | B6  | C2  | 60.67(14)   |
| B1 | B2 | B10 | B9  | 0.83(16)    | B9  | B5 | B6  | C3  | 98.29(13)   |
| B1 | B3 | B4  | C3  | -39.92(11)  | B9  | B5 | B6  | B7  | -0.69(16)   |
| B1 | B3 | B4  | B5  | -101.90(13) | B9  | B5 | B6  | B8  | -38.01(12)  |
| B1 | B3 | B4  | B9  | -138.98(12) | B9  | B5 | B8  | B6  | 137.67(12)  |
| B1 | B3 | B9  | B4  | 37.48(11)   | B9  | B5 | B8  | B7  | 100.27(13)  |
| B1 | B3 | B9  | B5  | 0.28(16)    | B9  | B5 | B8  | B10 | 36.77(12)   |
| B1 | B3 | B9  | B8  | -62.56(15)  | B9  | B8 | B10 | B2  | 101.03(13)  |
| B1 | B3 | B9  | B10 | -100.69(13) | B9  | B8 | B10 | B3  | 38.14(11)   |
| B1 | B3 | B10 | B2  | -37.21(12)  | B9  | B8 | B10 | B7  | 138.42(12)  |
| B1 | B3 | B10 | B7  | 0.41(16)    | B10 | B2 | B3  | B1  | 138.97(13)  |
| B1 | B3 | B10 | B8  | 63.84(15)   | B10 | B2 | B3  | B4  | 100.16(13)  |
| B1 | B3 | B10 | B9  | 102.11(13)  | B10 | B2 | B3  | B9  | 36.17(12)   |
| B1 | B4 | B5  | C3  | 35.40(11)   | B10 | B2 | B7  | C2  | -135.82(12) |
| B1 | B4 | B5  | B6  | 0.03(16)    | B10 | B2 | B7  | B6  | -99.89(13)  |
| B1 | B4 | B5  | B8  | -63.00(15)  | B10 | B2 | B7  | B8  | -37.21(12)  |
| B1 | B4 | B5  | B9  | -101.21(13) | B10 | B3 | B4  | C3  | 61.88(15)   |
| B1 | B4 | B9  | B3  | -37.01(11)  | B10 | B3 | B4  | B1  | 101.80(13)  |
| B1 | B4 | B9  | B5  | 101.35(13)  | B10 | B3 | B4  | B5  | -0.10(15)   |
| B1 | B4 | B9  | B8  | 63.77(15)   | B10 | B3 | B4  | B9  | -37.18(11)  |
| B1 | B4 | B9  | B10 | 0.53(16)    | B10 | B3 | B9  | B4  | 138.17(12)  |
| B2 | C2 | C3  | C4  | -148.83(13) | B10 | B3 | B9  | B5  | 100.96(13)  |
| B2 | C2 | C3  | B1  | -41.35(11)  | B10 | B3 | B9  | B8  | 38.12(11)   |
| B2 | C2 | C3  | B4  | -1.61(15)   | B10 | B7 | B8  | B5  | -100.55(13) |
| B2 | C2 | C3  | B5  | 65.51(14)   | B10 | B7 | B8  | B6  | -137.94(12) |
| B2 | C2 | C3  | B6  | 104.58(12)  | B10 | B7 | B8  | B9  | -37.03(12)  |
| B2 | C2 | B1  | C3  | 135.59(11)  | B10 | B8 | B9  | B3  | -38.34(12)  |
| B2 | C2 | B1  | C14 | -111.24(15) | B10 | B8 | B9  | B4  | -100.95(13) |
| B2 | C2 | B1  | B3  | 38.56(11)   | B10 | B8 | B9  | B5  | -138.80(13) |
| B2 | C2 | B1  | B4  | 99.46(12)   |     |    |     |     |             |

**Hydrogen Atom Coordinates ( $\text{\AA}\times 10^4$ ) and Isotropic Displacement Parameters ( $\text{\AA}^2\times 10^3$ ) for mo\_0828\_CG\_0m.**

| Atom | x       | y       | z       | U(eq) |
|------|---------|---------|---------|-------|
| H5   | 4813.59 | 6176.88 | 1981.04 | 24    |
| H6   | 5402.57 | 6440.38 | 770.38  | 28    |
| H7   | 5337.21 | 8323.25 | 207.3   | 29    |
| H8   | 4698.2  | 9960.29 | 865.32  | 28    |
| H9   | 4186.68 | 9725.04 | 2095.35 | 25    |
| H10A | 7852.56 | 7156.22 | 4918.46 | 25    |
| H10B | 6495.09 | 6809.51 | 4748.35 | 25    |



|      |          |          |          |    |
|------|----------|----------|----------|----|
| H11A | 6044.25  | 8083.32  | 5718.94  | 40 |
| H11B | 7372.63  | 8537.27  | 5863.22  | 40 |
| H11C | 7061.37  | 7195.17  | 6068.46  | 40 |
| H12A | 8284.39  | 9342.63  | 4857.78  | 27 |
| H12B | 7643.83  | 9996.45  | 4113.47  | 27 |
| H13A | 8424.71  | 8611.85  | 3319.32  | 43 |
| H13B | 8995.42  | 7868.96  | 4046.85  | 43 |
| H13C | 9478.32  | 9170.57  | 3887.6   | 43 |
| H15  | 6729.22  | 6922.07  | 3130.99  | 23 |
| H16  | 8225.52  | 5597.18  | 2973.92  | 26 |
| H17  | 7924.76  | 3534.79  | 3077.92  | 25 |
| H19  | 4620.55  | 4168.43  | 3560.04  | 22 |
| H2   | 4865(18) | 6714(18) | 4942(12) | 23 |
| H3   | 3076(18) | 5212(19) | 4142(11) | 24 |
| H4   | 2866(17) | 6042(19) | 2502(11) | 23 |
| H5A  | 2095(17) | 8469(19) | 2401(12) | 24 |
| H6A  | 3891(17) | 9881(18) | 3258(11) | 22 |
| H7A  | 4157(17) | 9175(18) | 4847(12) | 23 |
| H8A  | 1758(18) | 9247(19) | 3946(12) | 24 |
| H9A  | 1120(18) | 6813(19) | 3505(12) | 25 |
| H10  | 2359(18) | 7235(19) | 5048(12) | 25 |

## Experimental

Single crystals of C<sub>19</sub>H<sub>28</sub>B<sub>10</sub>BrNO [mo\_0828\_CG\_0m] were recrystallised from a mixture of chloroform and hexane by slow evaporation. A suitable crystal was selected and the crystal was mounted on a MITIGEN holder oil on a Bruker D8 Venture MoCu Dual Source diffractometer. The crystal was kept at 100.03 K during data collection. Using Olex2<sup>[2]</sup>, the structure was solved with the XT<sup>[3]</sup> structure solution program using Intrinsic Phasing and refined with the XL<sup>[4]</sup> refinement package using Least Squares minimisation.

## Crystal structure determination of 4ai

**Crystal Data** for C<sub>19</sub>H<sub>28</sub>B<sub>10</sub>BrNO (*M* = 474.43 g/mol): monoclinic, space group P2<sub>1</sub>/n (no. 14), *a* = 11.5021(12) Å, *b* = 11.2242(12) Å, *c* = 17.6391(19) Å, *β* = 97.227(3)°, *V* = 2259.1(4) Å<sup>3</sup>, *Z* = 4, *T* = 100.0 K, *μ*(MoK $\alpha$ ) = 1.833 mm<sup>-1</sup>, *D*<sub>calc</sub> = 1.395 g/cm<sup>3</sup>, 69892 reflections measured (4.312° ≤ 2 $\theta$  ≤ 59.356°), 6364 unique (*R*<sub>int</sub> = 0.0329, *R*<sub>sigma</sub> = 0.0179) which were used in all calculations. The final *R*<sub>1</sub> was 0.0276 (*I* > 2 $\sigma$ (*I*)) and *wR*<sub>2</sub> was 0.0749 (all data).

## References

- [1] A. Toppino, A. R. Genady, M. E. El-Zaria, J. Reeve, F. Mostofian, J. Kent and J. F. Valliant, *Inorg. Chem.*, 2013, **52**, 8743–8749.
- [2] O.V. Dolomanov, L. J. Bourhis, R. J. Gildea, J. A. K. Howard and H. Puschmann, *J. Appl. Cryst.*, 2009, **42**, 339–341.
- [3] G.M. Sheldrick, *Acta Cryst.*, 2015, **A71**, 3–8.
- [4] G.M. Sheldrick, *Acta Cryst.*, 2008, **A64**, 112–122.
- [5] Gaussian 16, Revision A.03, M. J. Frisch, G. W. Trucks, H. B. Schlegel, G. E. Scuseria, M. A. Robb, J. R. Cheeseman, G. Scalmani, V. Barone, G. A. Petersson, H. Nakatsuji, X. Li, M. Caricato, A. V. Marenich, J. Bloino, B. G. Janesko, R. Gomperts, B. Mennucci, H. P. Hratchian, J. V. Ortiz, A. F. Izmaylov, J. L. Sonnenberg, D. Williams-Young, F. Ding, F. Lipparini, F. Egidi, J. Goings, B. Peng, A. Petrone, T. Henderson, D. Ranasinghe, V. G. Zakrzewski, J. Gao, N. Rega, G. Zheng, W. Liang, M. Hada, M. Ehara, K. Toyota, R. Fukuda, J. Hasegawa, M. Ishida, T. Nakajima, Y. Honda, O. Kitao, H. Nakai, T. Vreven, K. Throssell, J. A. Montgomery, Jr., J. E. Peralta, F. Ogliaro, M. J. Bearpark, J. J. Heyd, E. N. Brothers, K. N. Kudin, V. N. Staroverov, T. A. Keith, R. Kobayashi, J. Normand, K. Raghavachari, A. P. Rendell, J. C. Burant, S. S. Iyengar, J. Tomasi, M. Cossi, J. M. Millam, M. Klene, C. Adamo, R. Cammi, J. W. Ochterski, R. L. Martin, K. Morokuma, O. Farkas, J. B. Foresman and D. J. Fox, Gaussian, Inc. Wallingford CT, 2016.
- [6] J. Tao, J. P. Perdew, V. N. Staroverov and G. E. Scuseria, *Phys. Rev. Lett.*, 2003, **91**, 46401.
- [7] a) S. Grimme, S. Ehrlich and L. Goerigk, *J. Comput. Chem.*, 2011, **32**, 1456–1465; b) S. Grimme, J. Antony, S. Ehrlich and H. Krieg, *J. Chem. Phys.*, 2010, **132**, 154104–154119.
- [8] a) F. Weigend and R. Ahlrichs, *Phys. Chem. Chem. Phys.*, 2005, **7**, 3297–3305; b) K. A. Peterson, D. Figgen, E. Goll, H. Stoll and M. Dolg, *J. Chem. Phys.*, 2003, **119**, 11113–11123.
- [9] D. Andrae, U. Haeussermann, M. Dolg, H. Stoll and H. Preuss, *Theor. Chim. Acta.*, 1990, **77**, 123–141.
- [10] Y. Zhao and D. G. Truhlar, *J. Phys. Chem. A*, 2005, **109**, 5656–5667.
- [11] A. V. Marenich, C. J. Cramer and D. G. Truhlar, *J. Phys. Chem. B*, 2009, **113**, 6378–6396.
- [12] C. Y. Legault, CYLview, 1.0b, Université de Sherbrooke, 2009, <http://www.cylview.org>.

# $^1\text{H}$ , $^{13}\text{C}$ , and $^{11}\text{B}$ NMR spectra

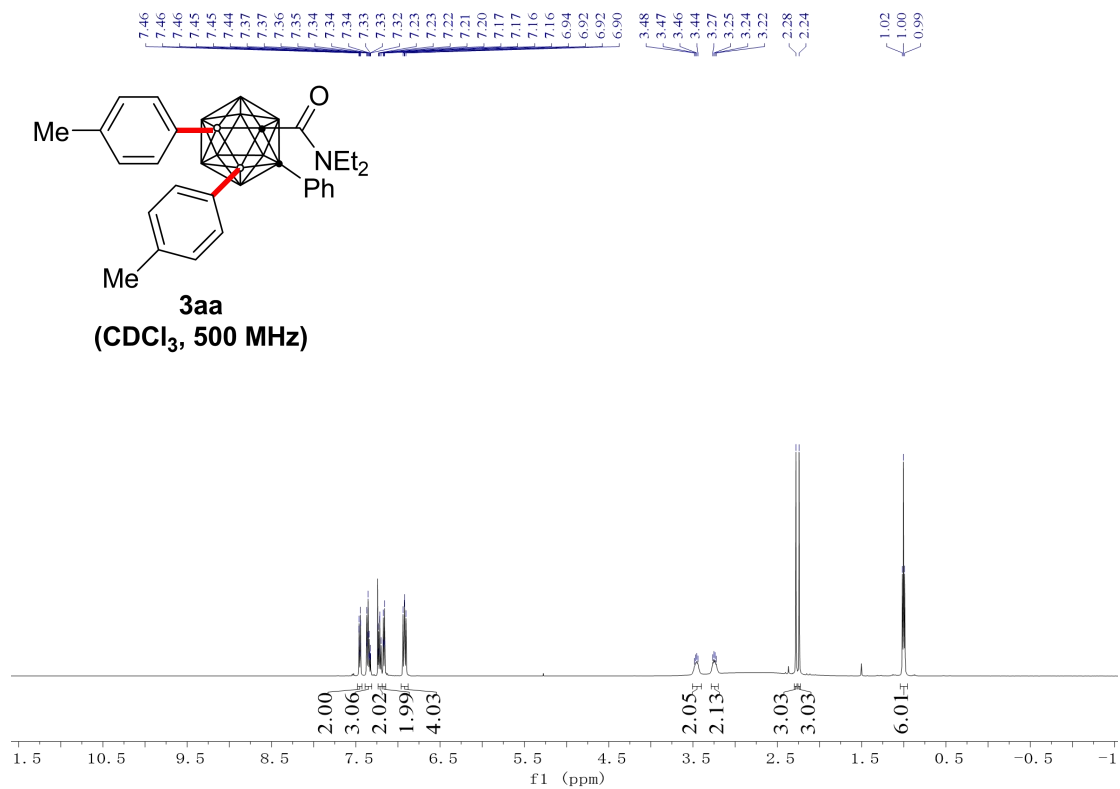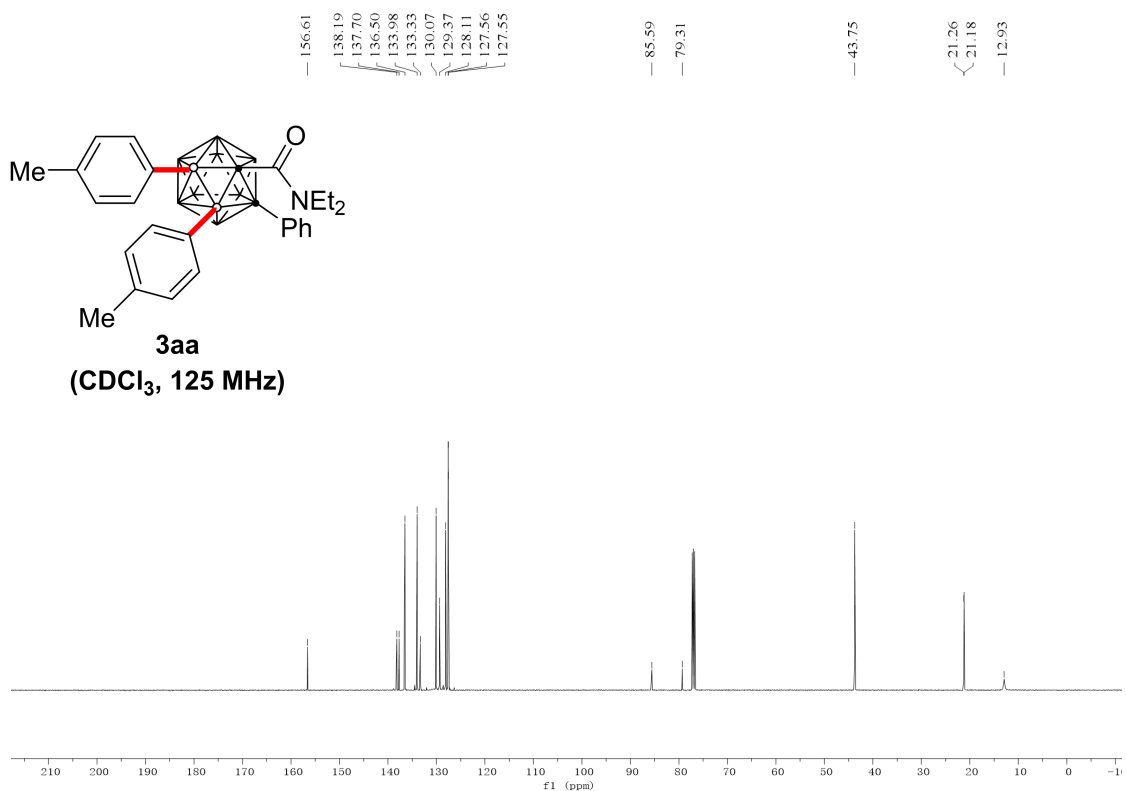

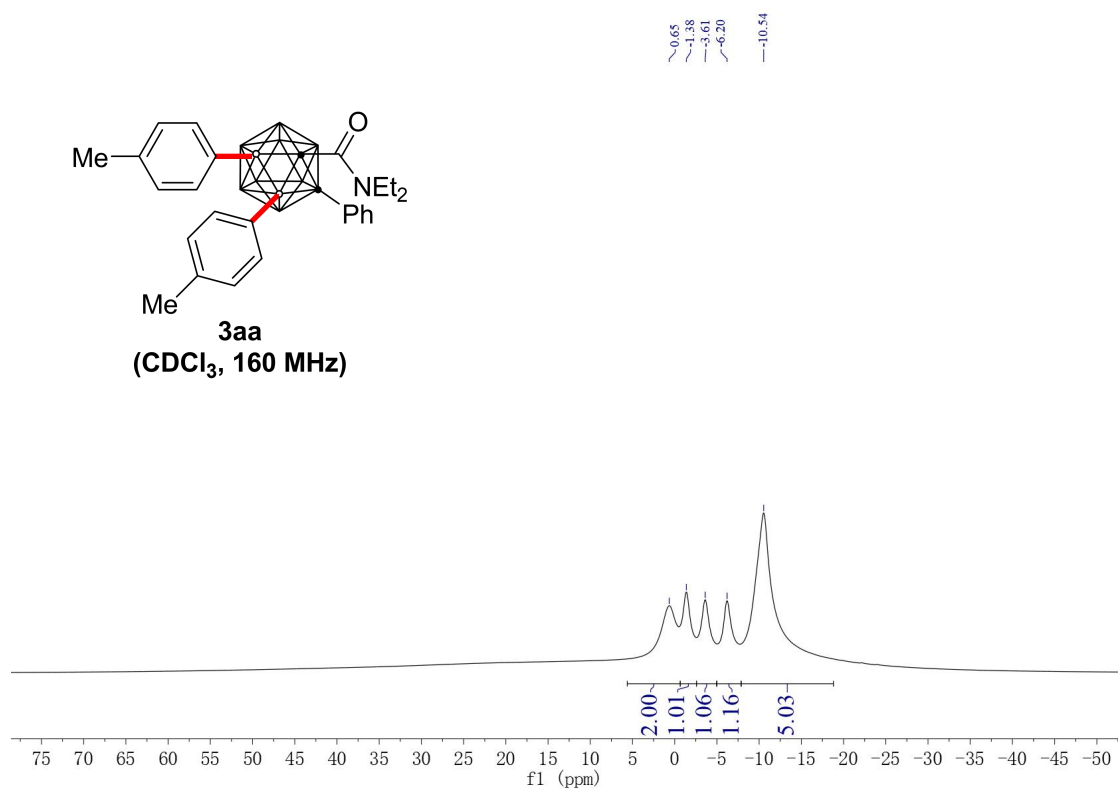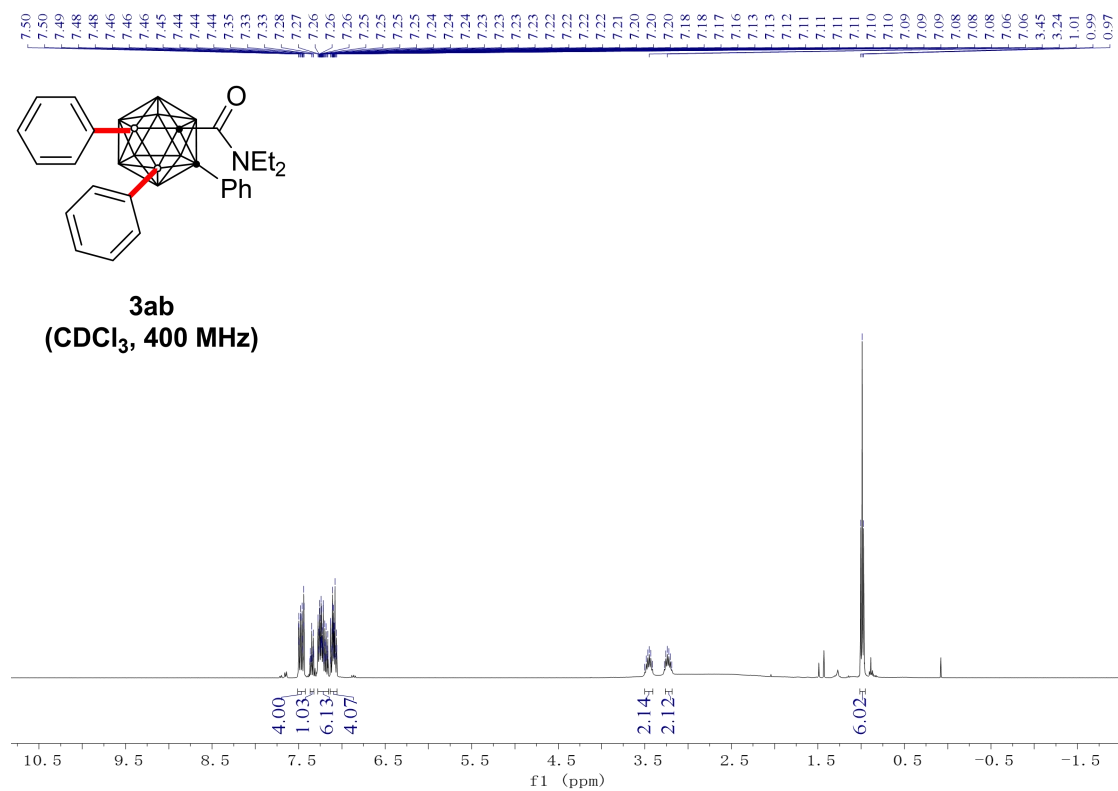

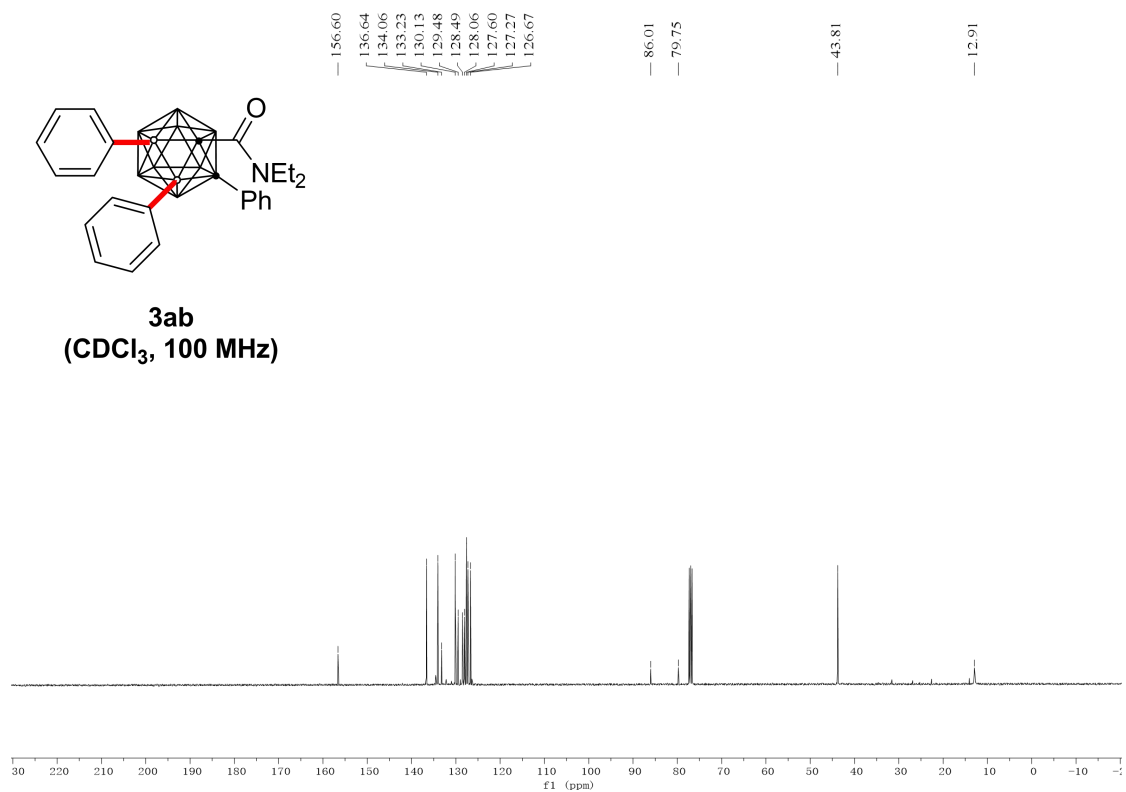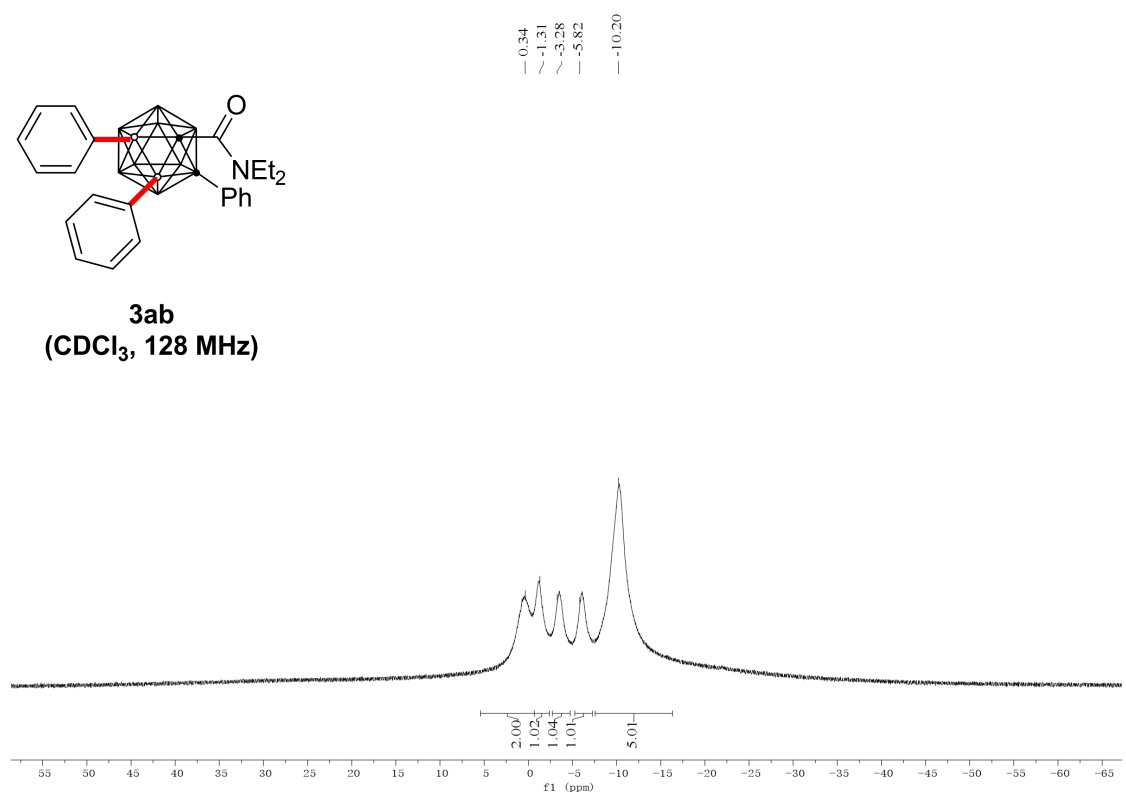

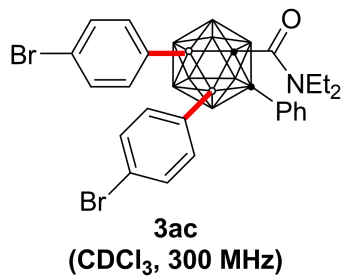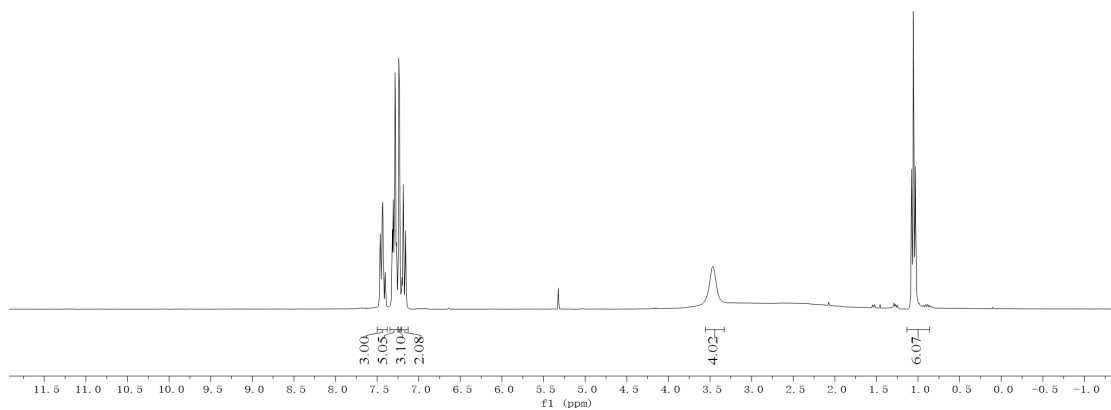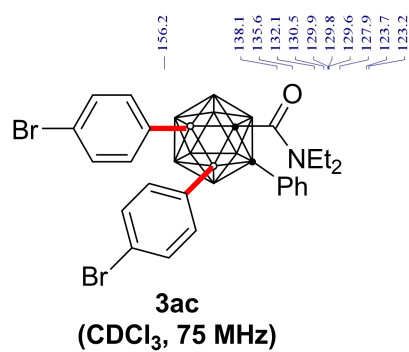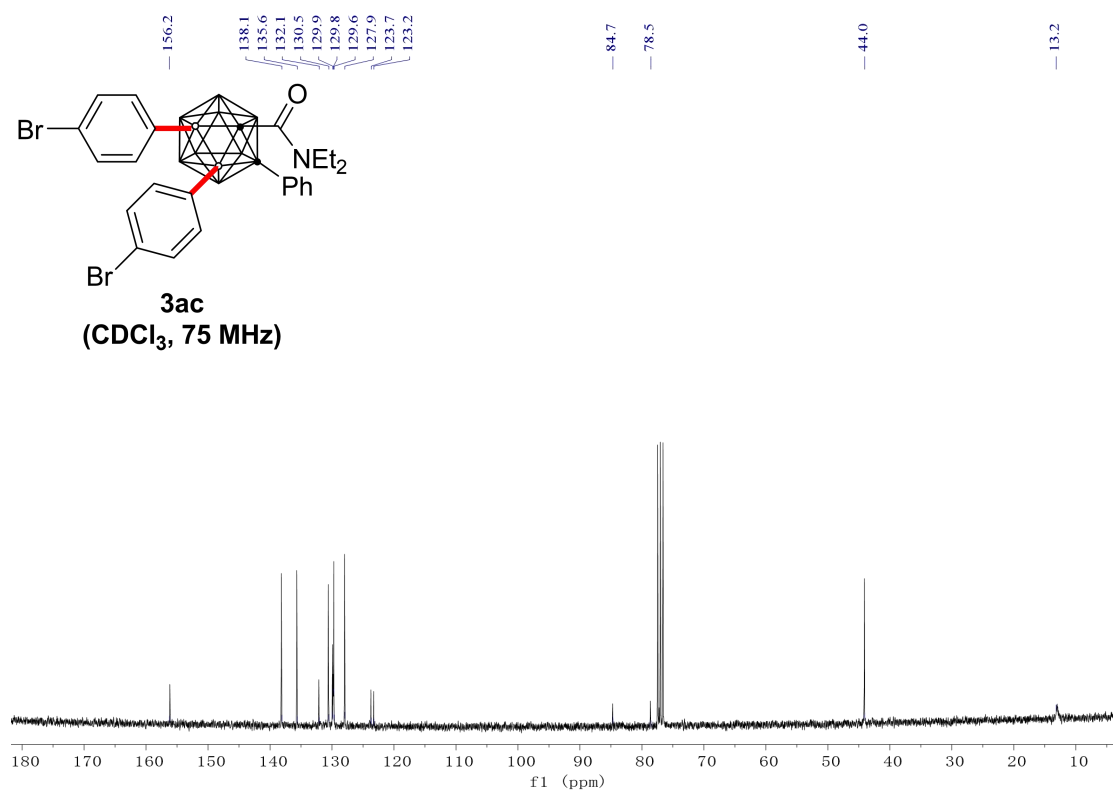

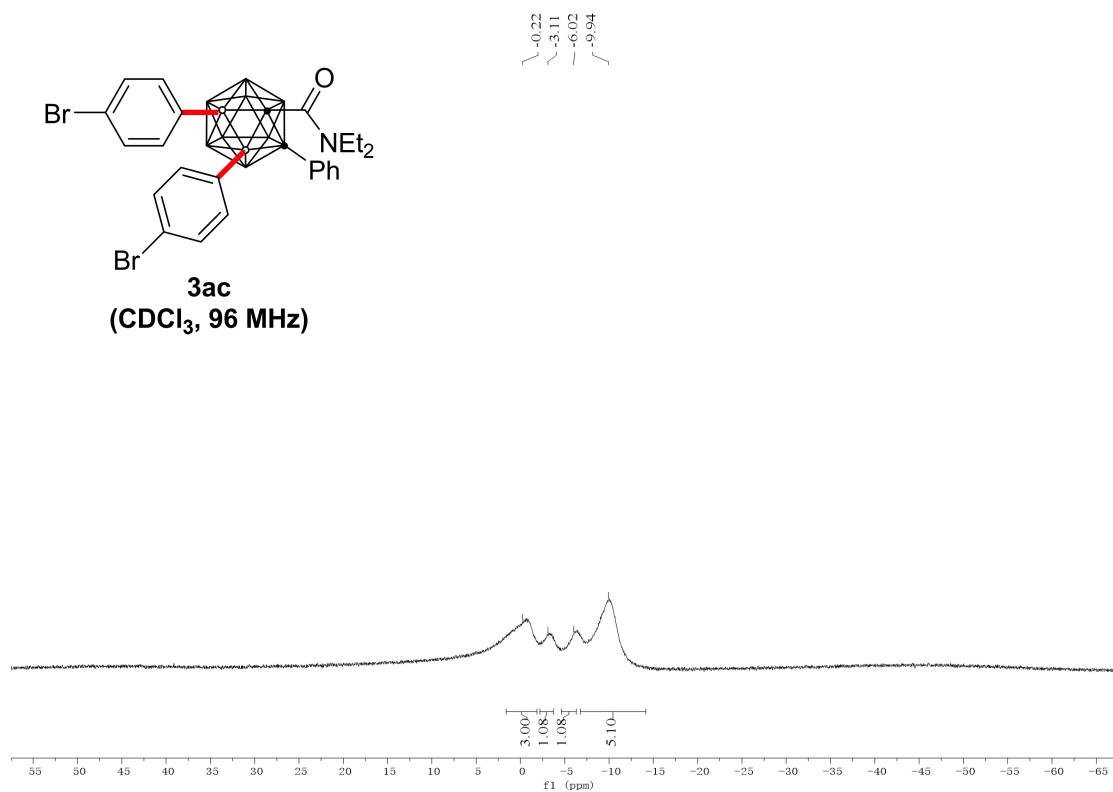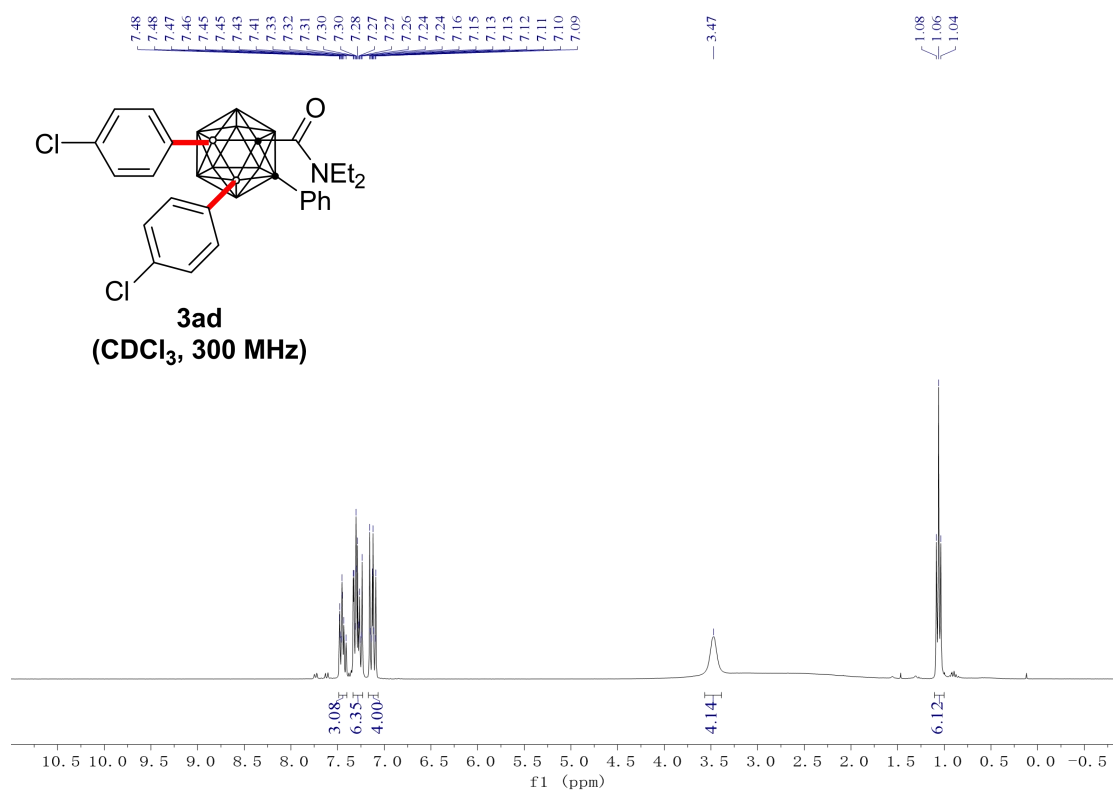

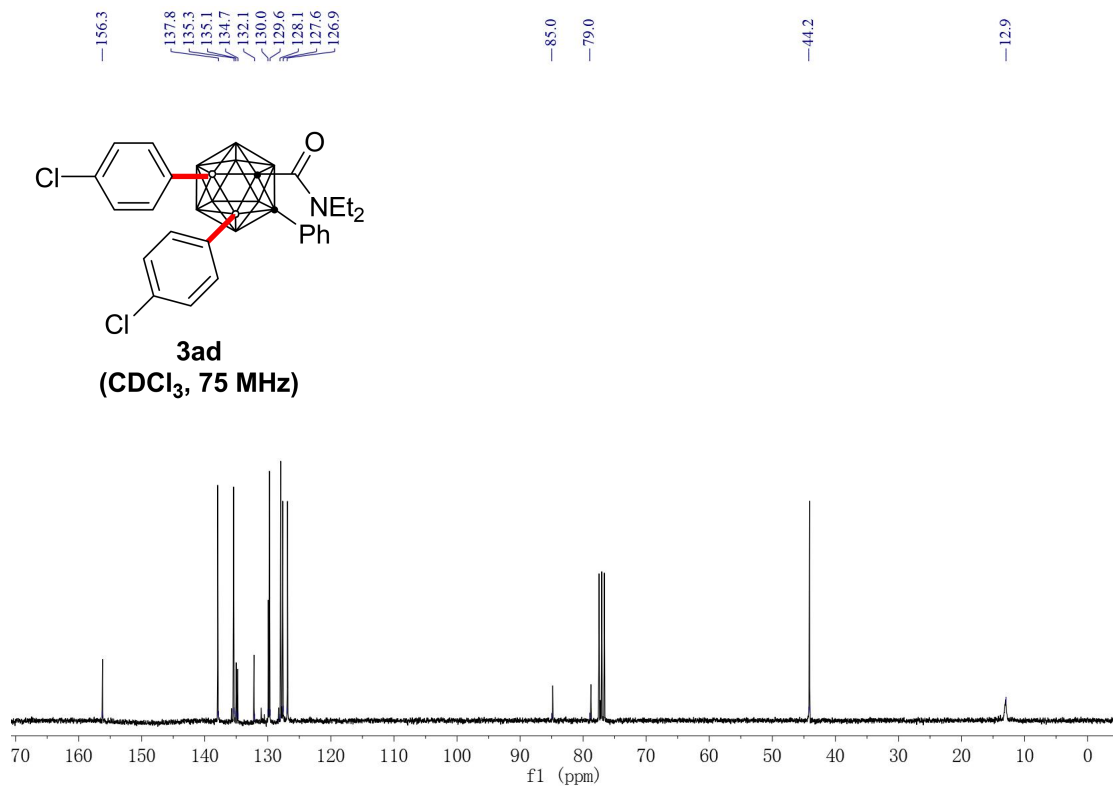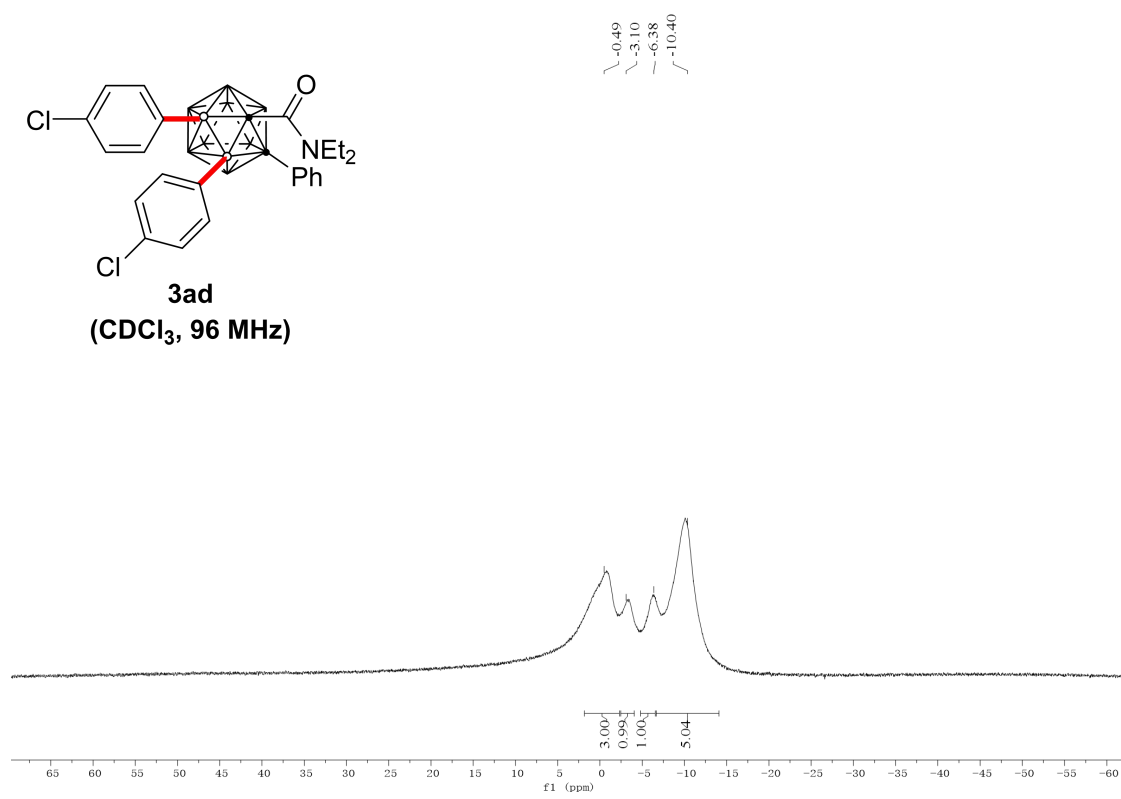



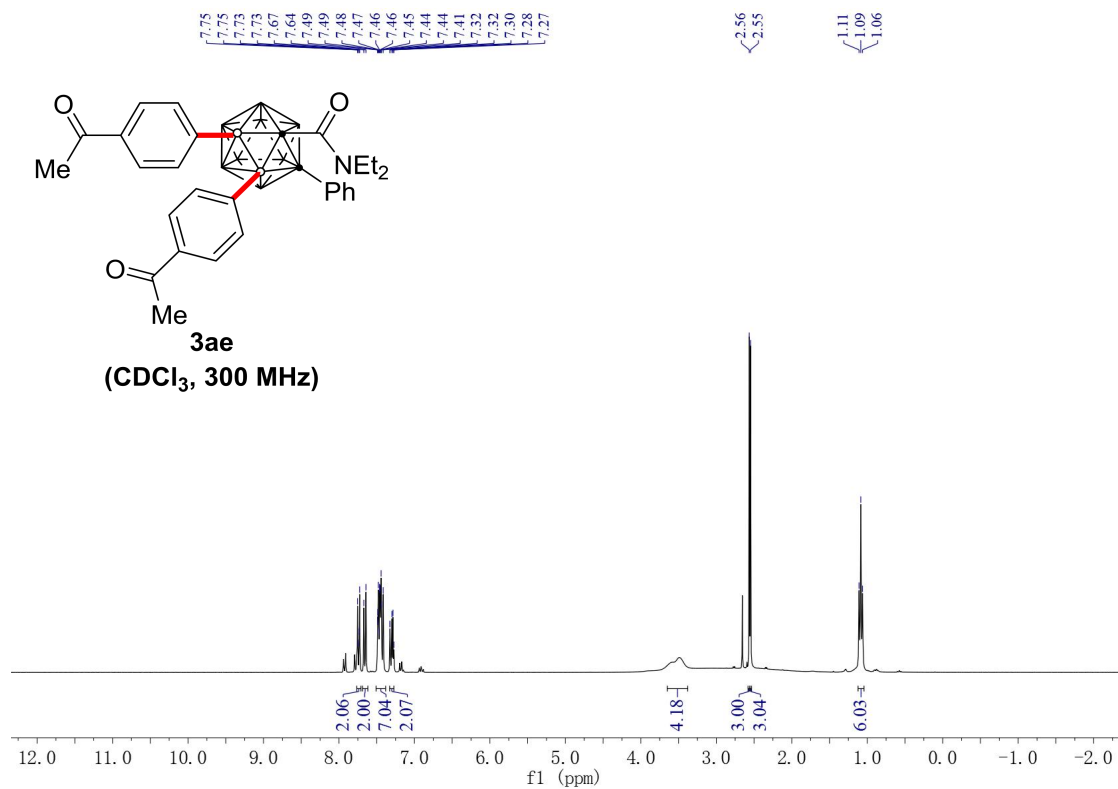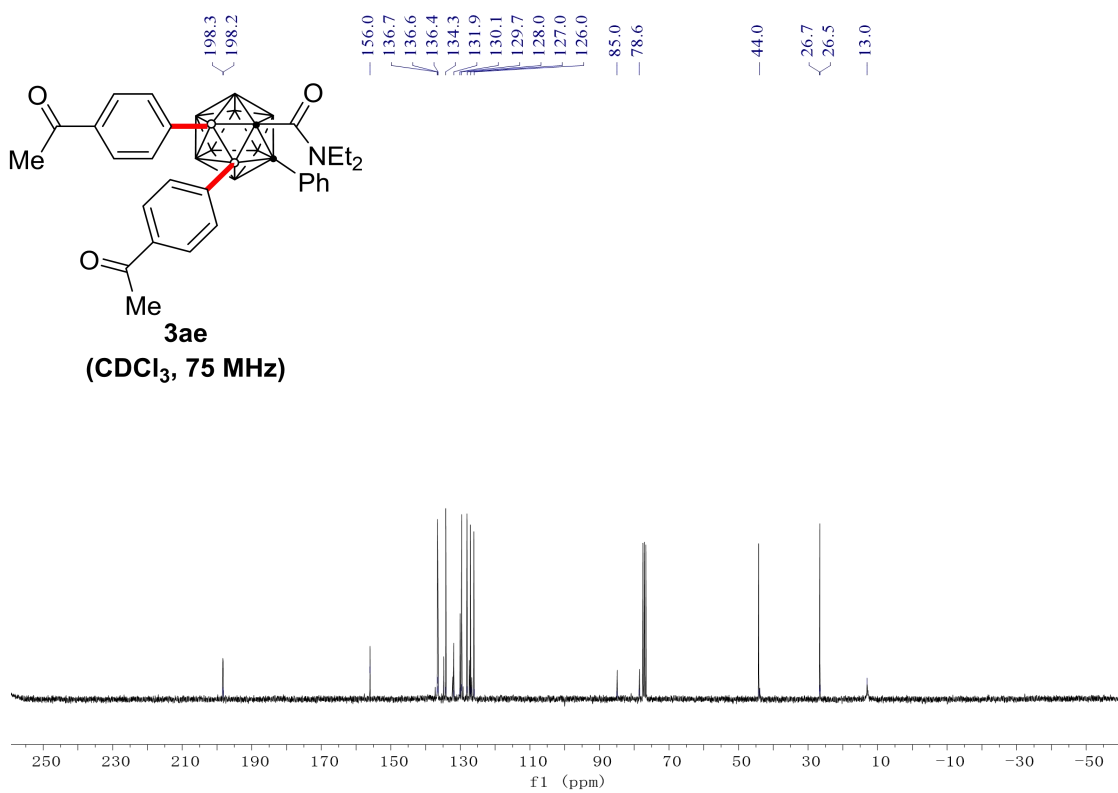

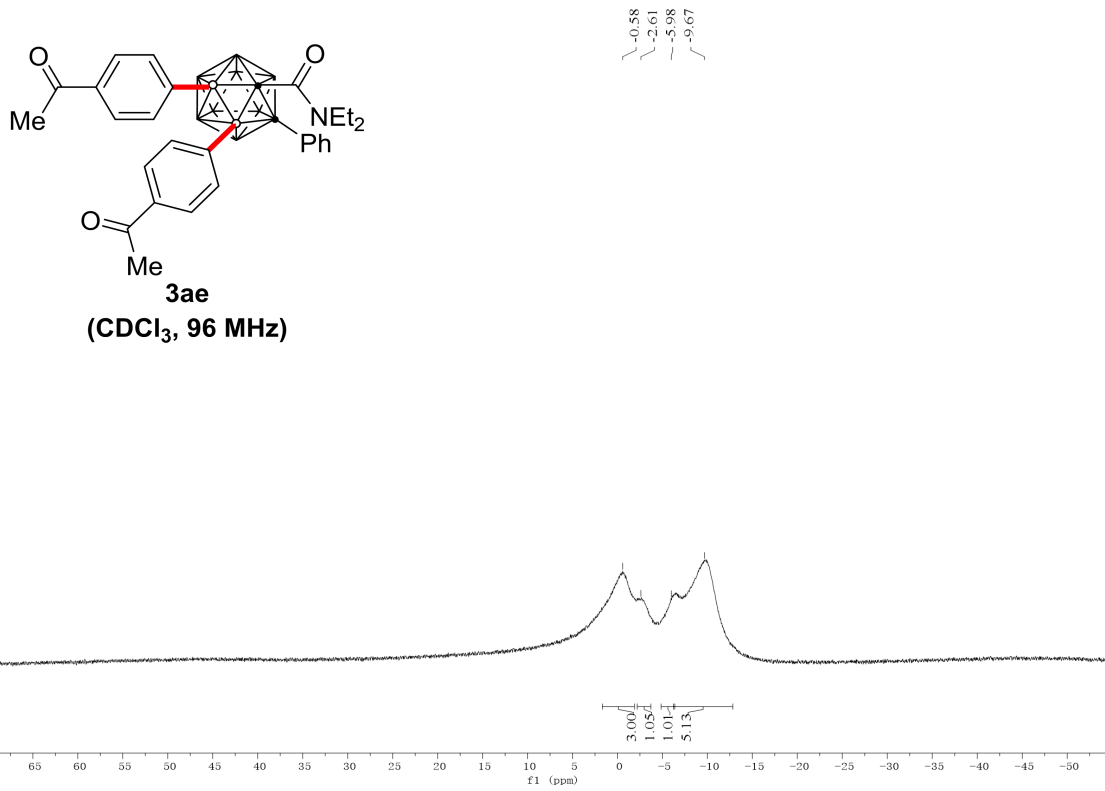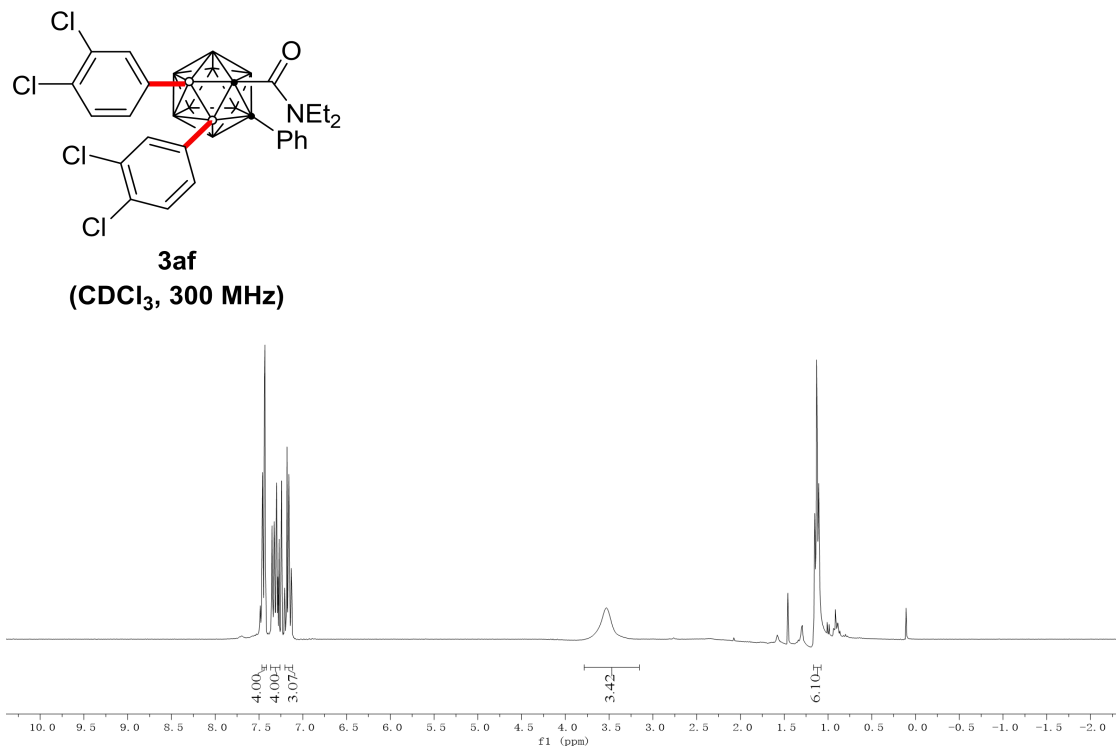

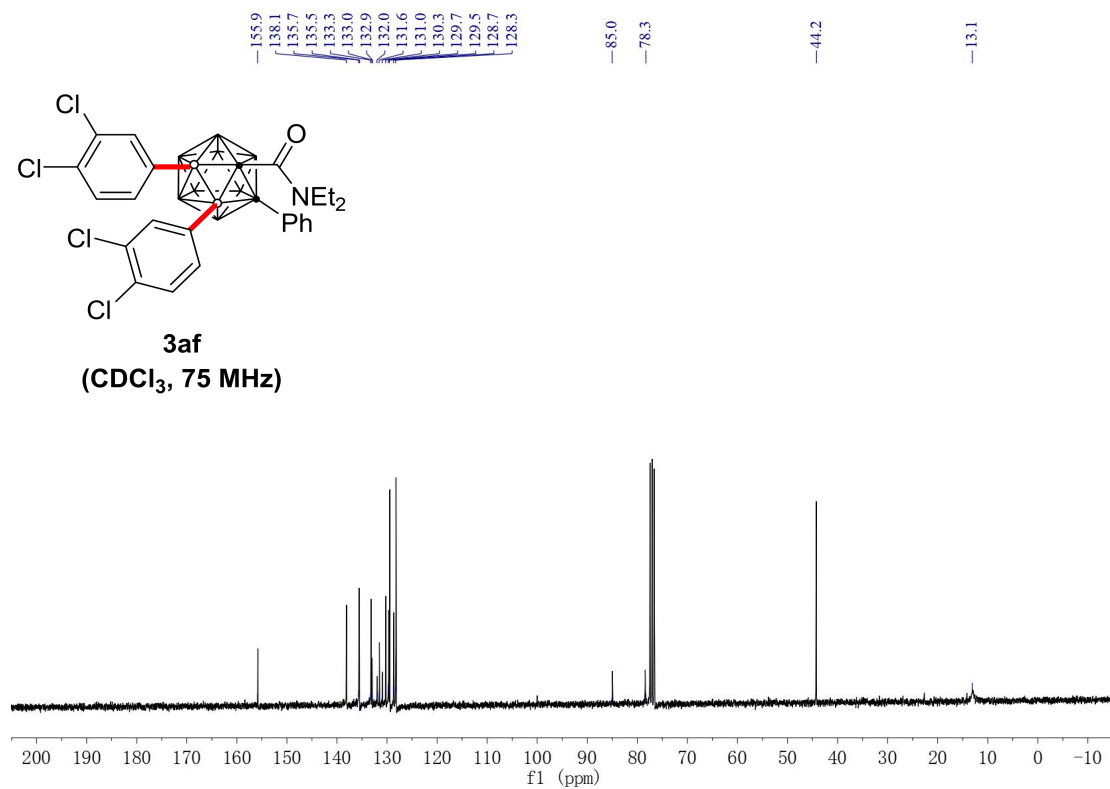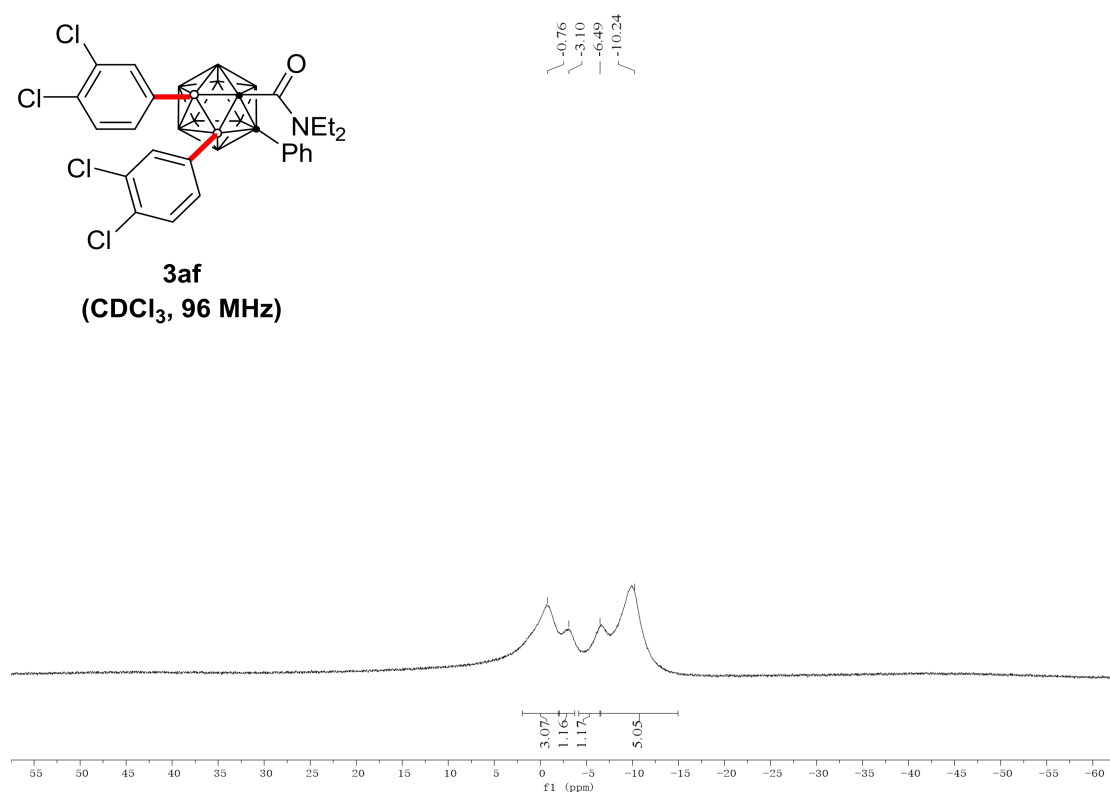

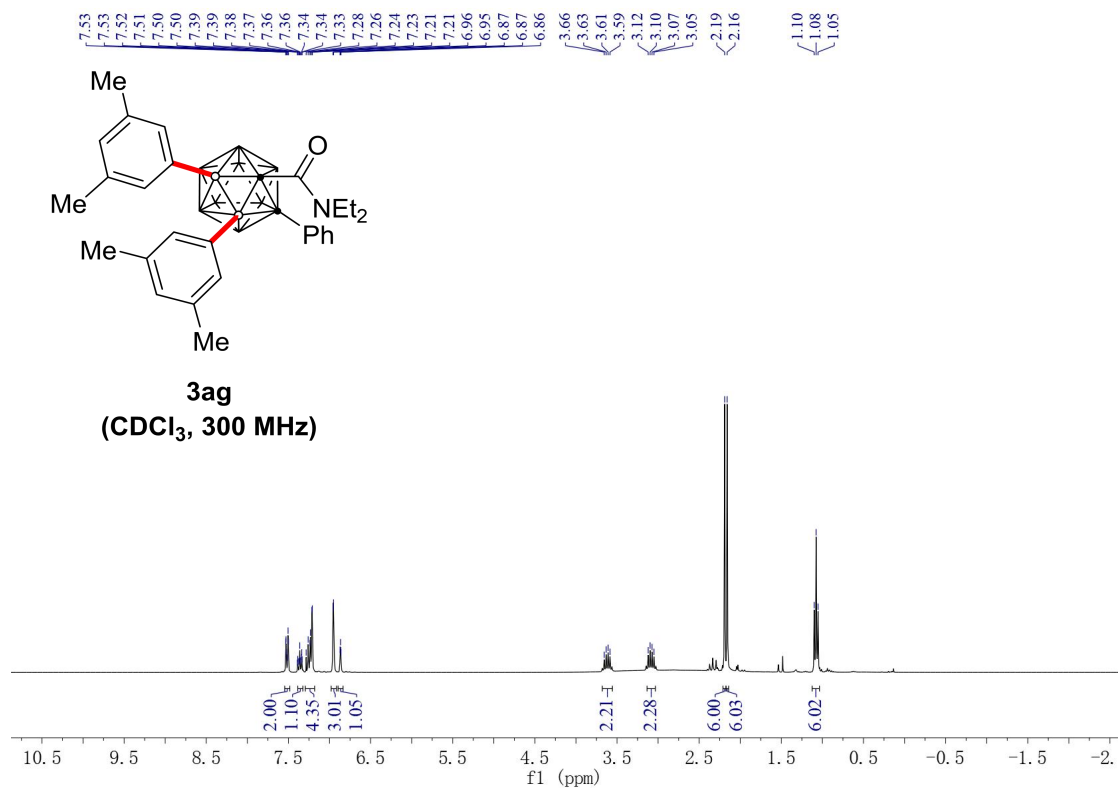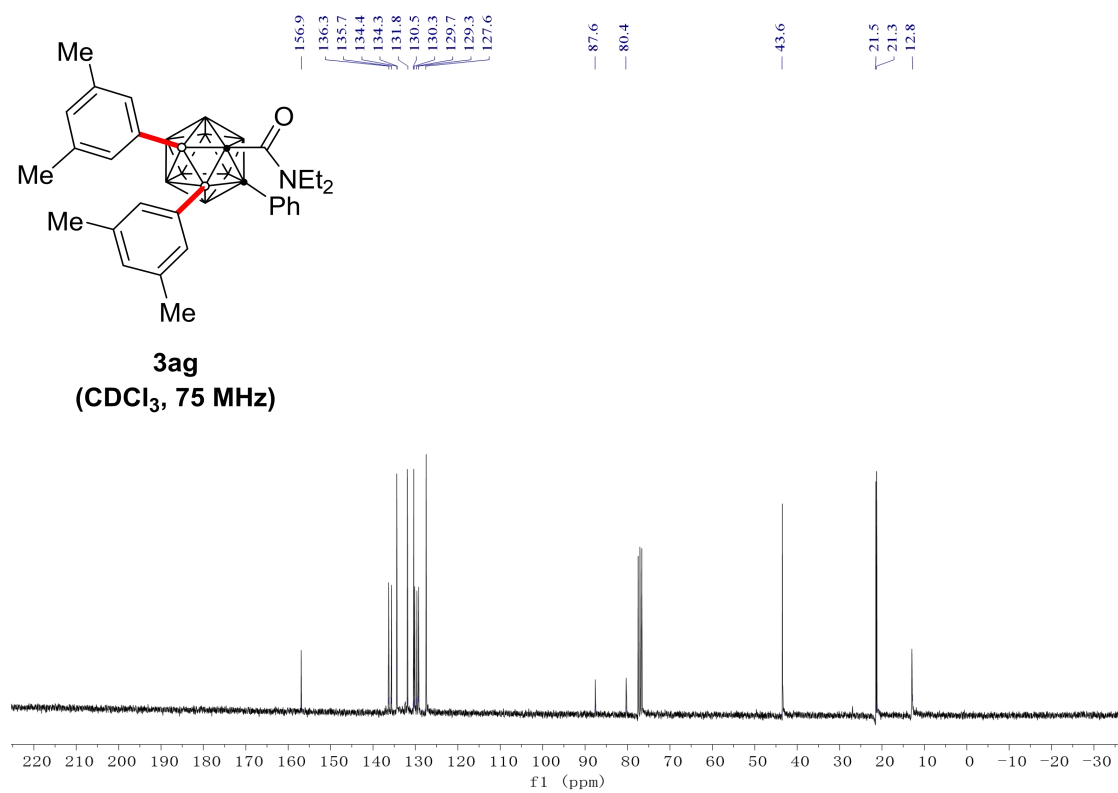

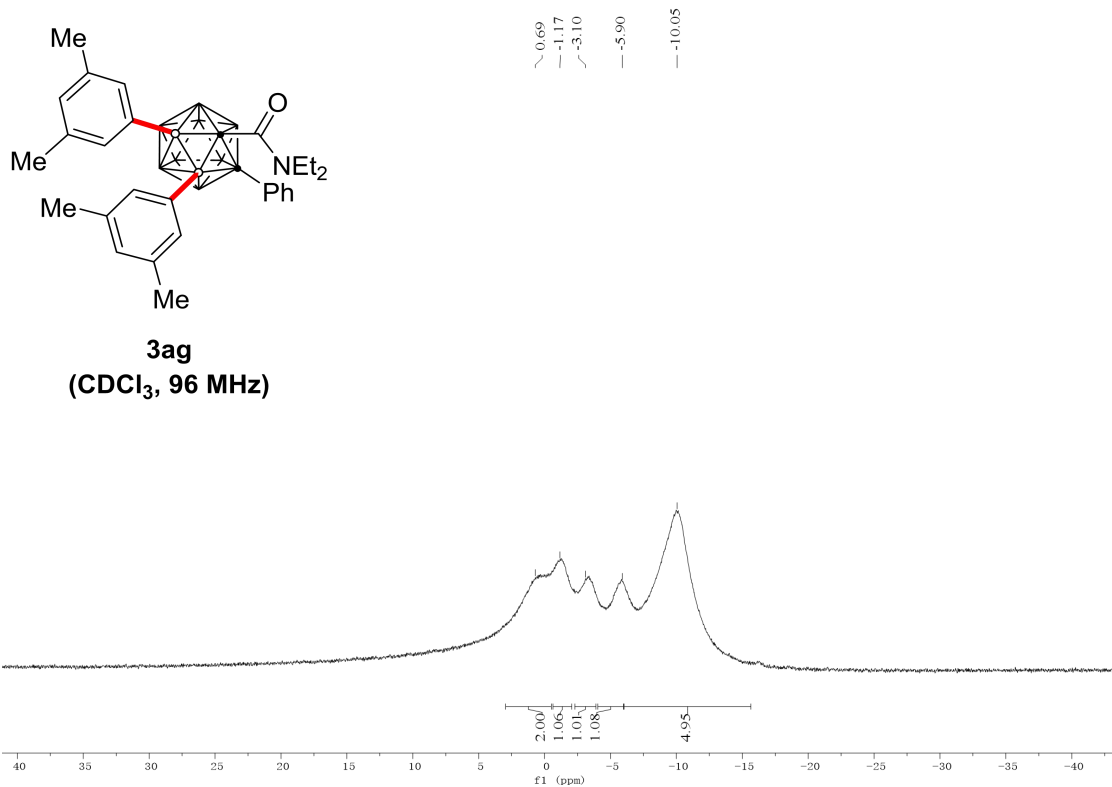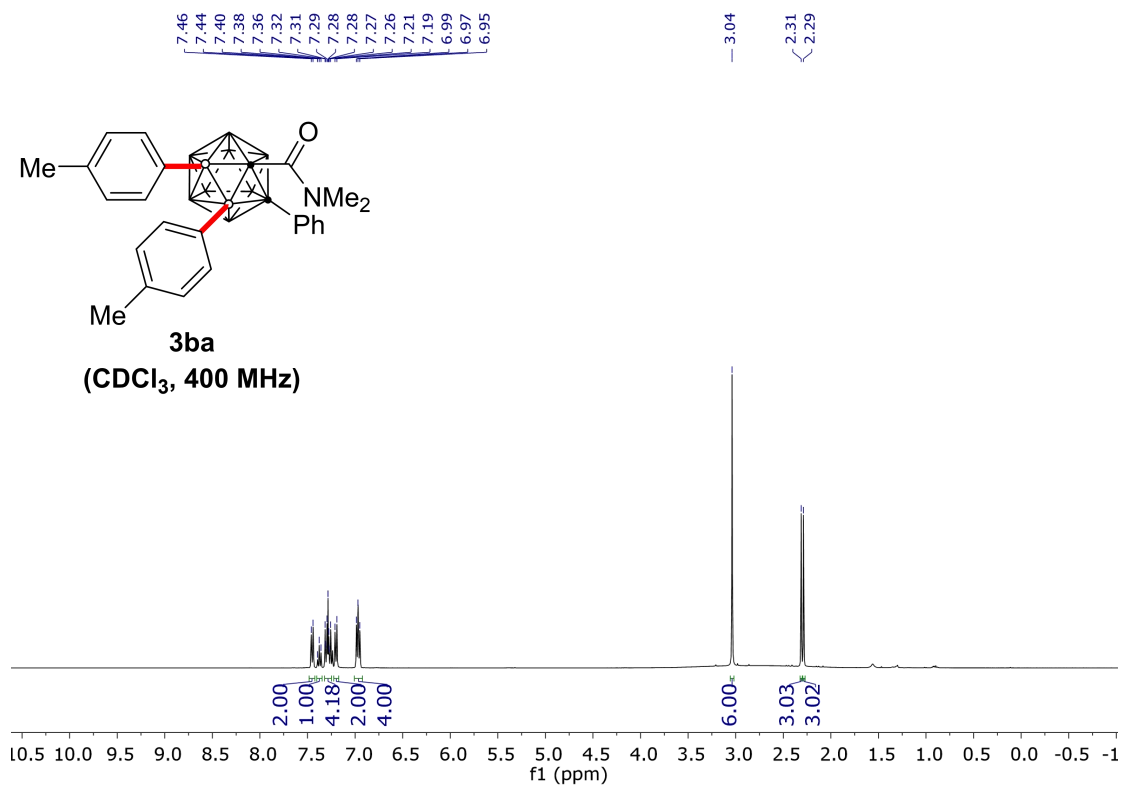

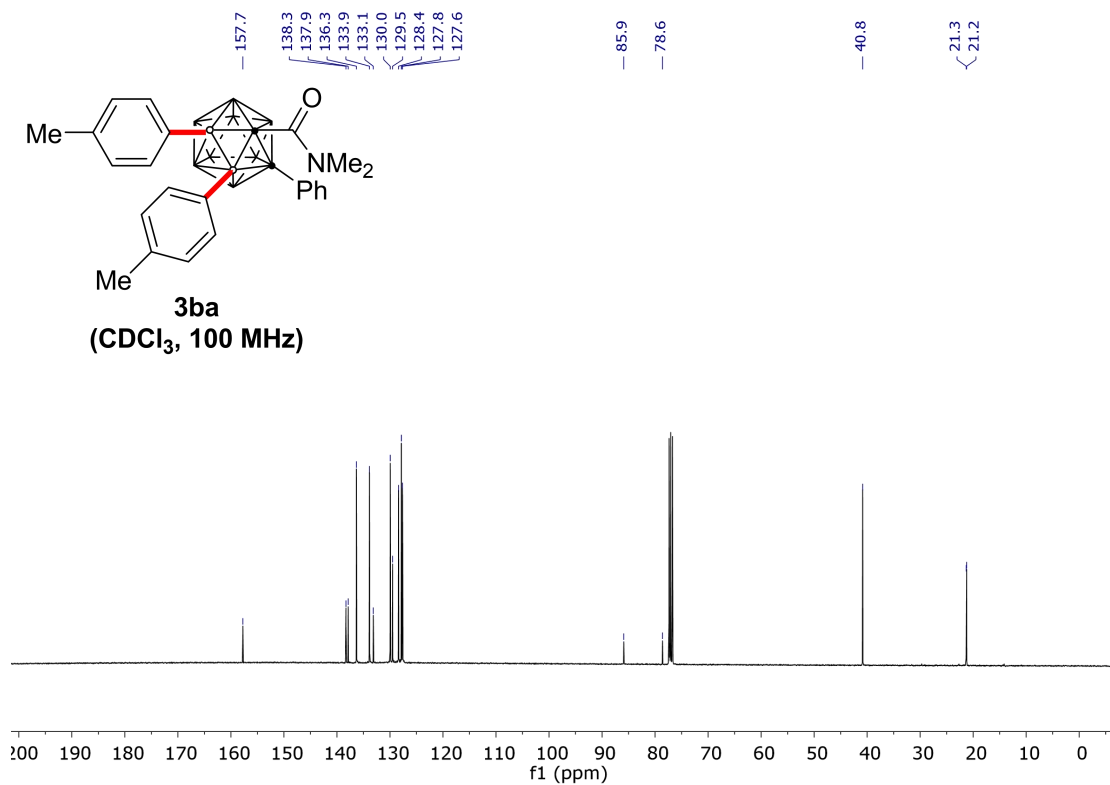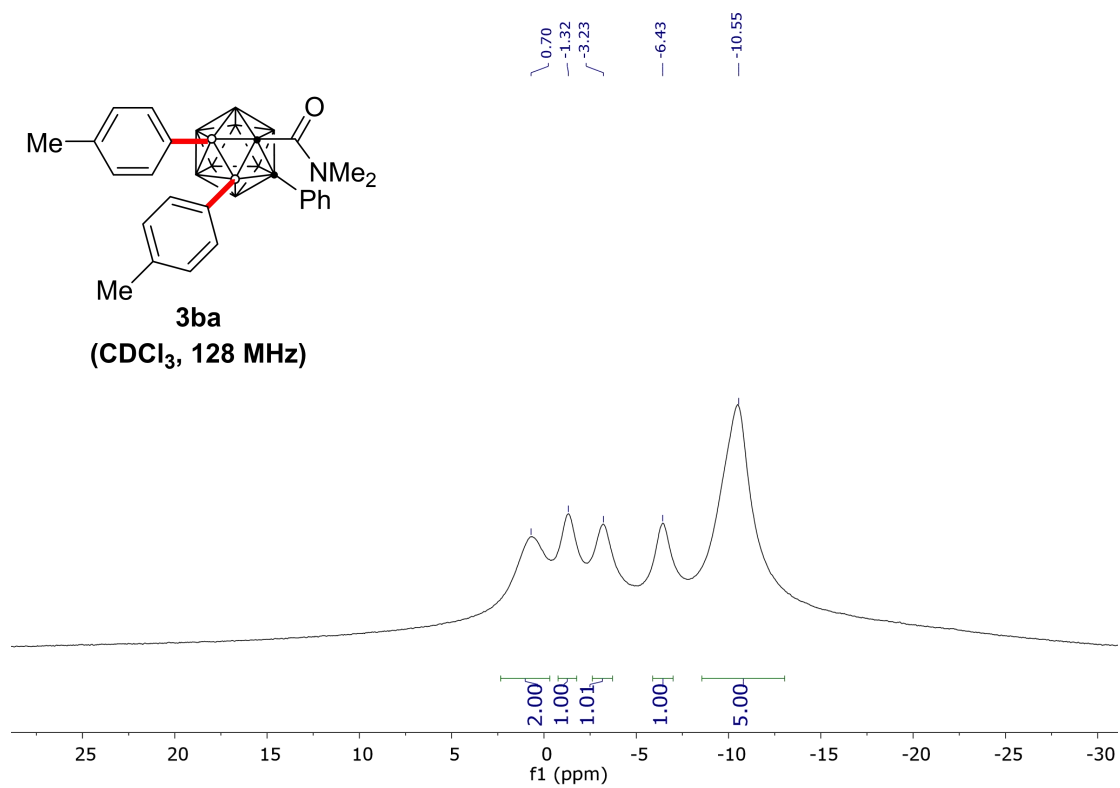

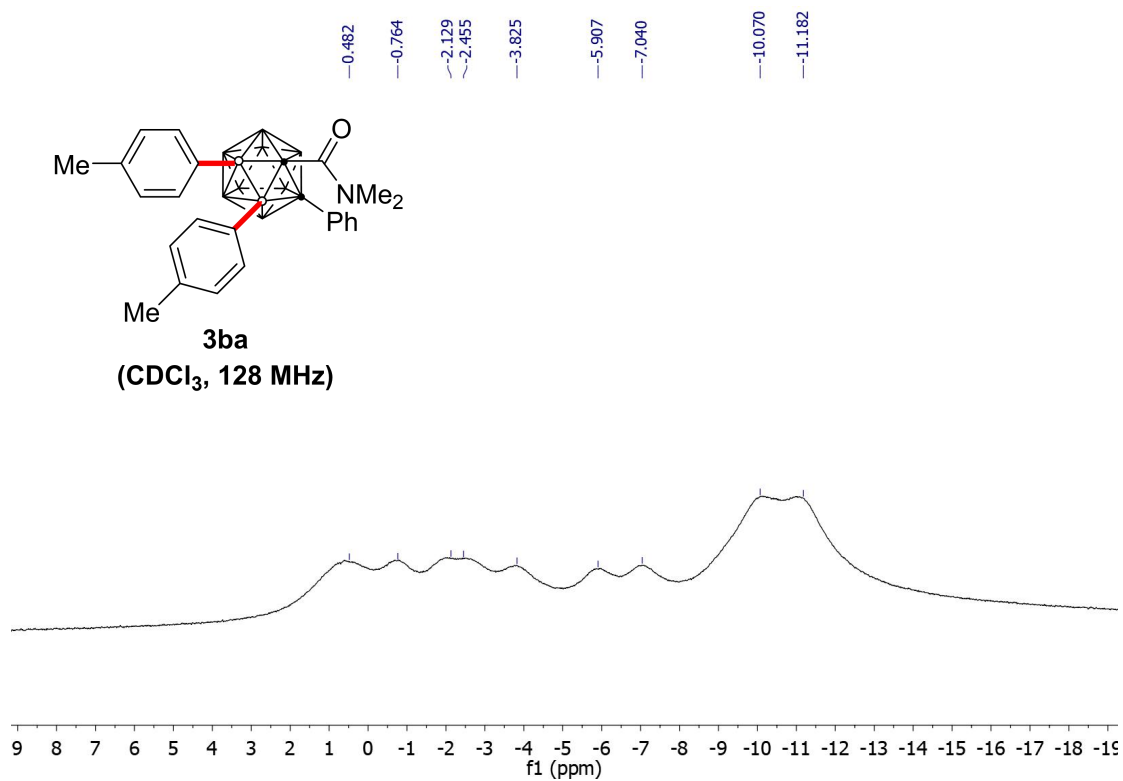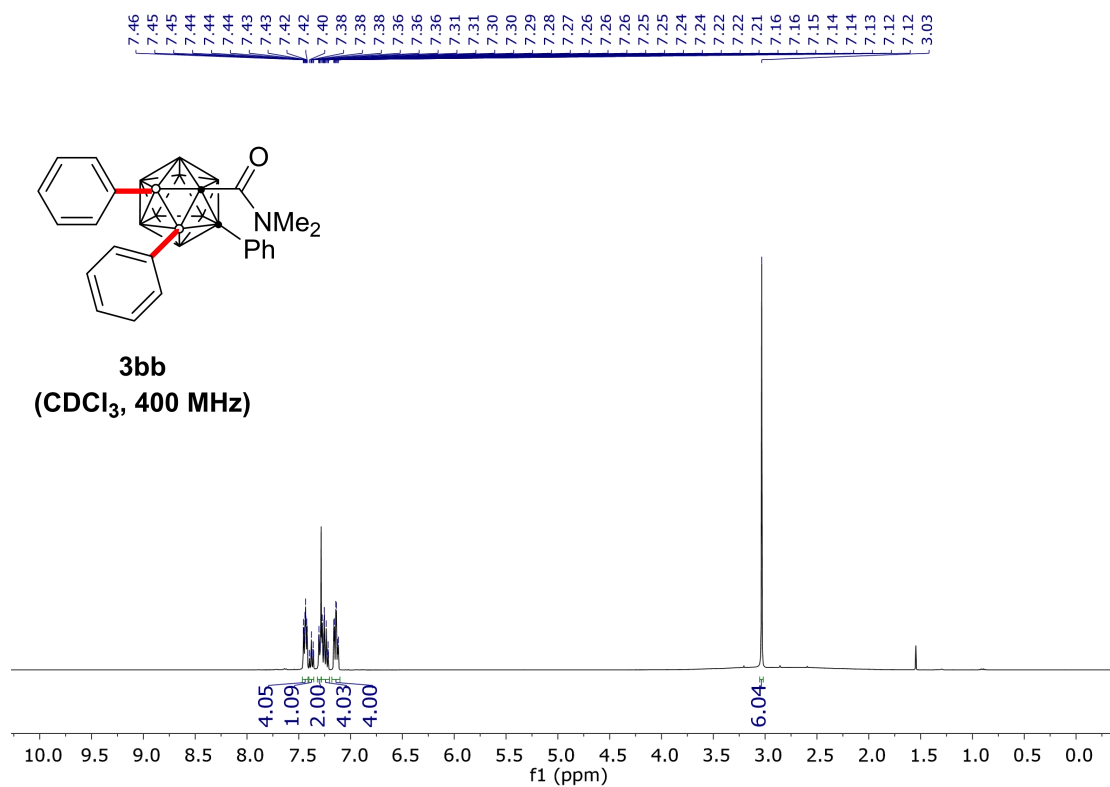

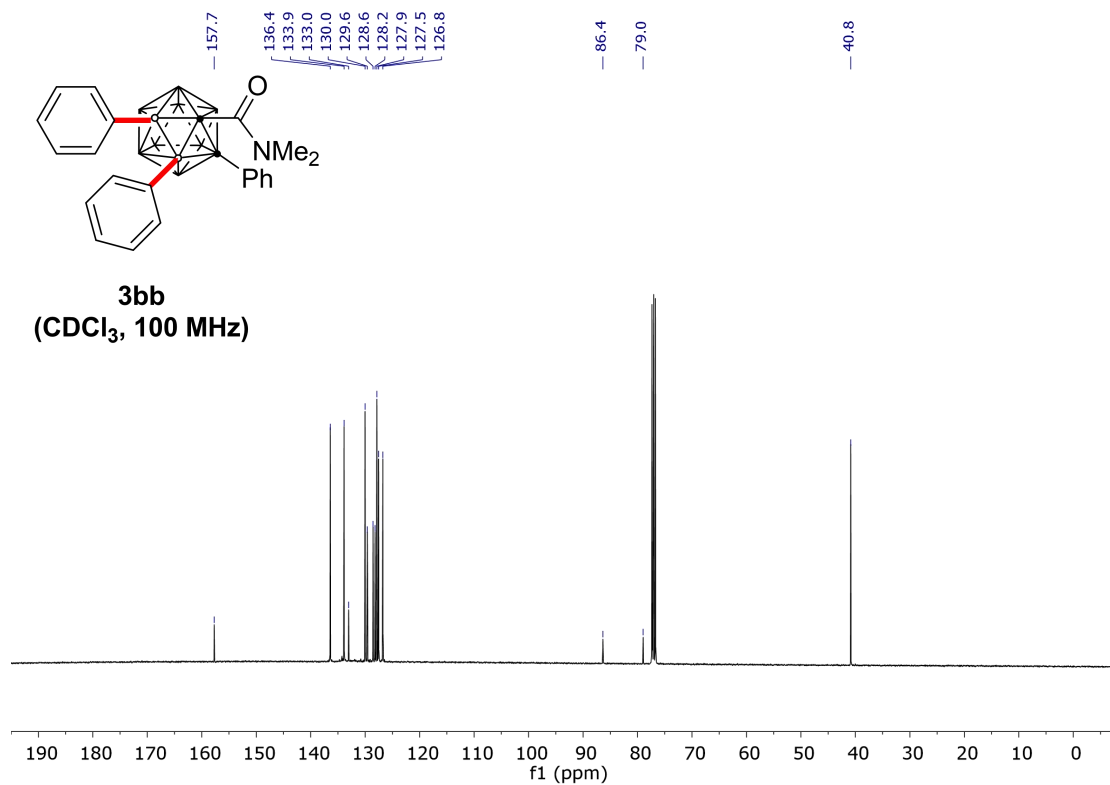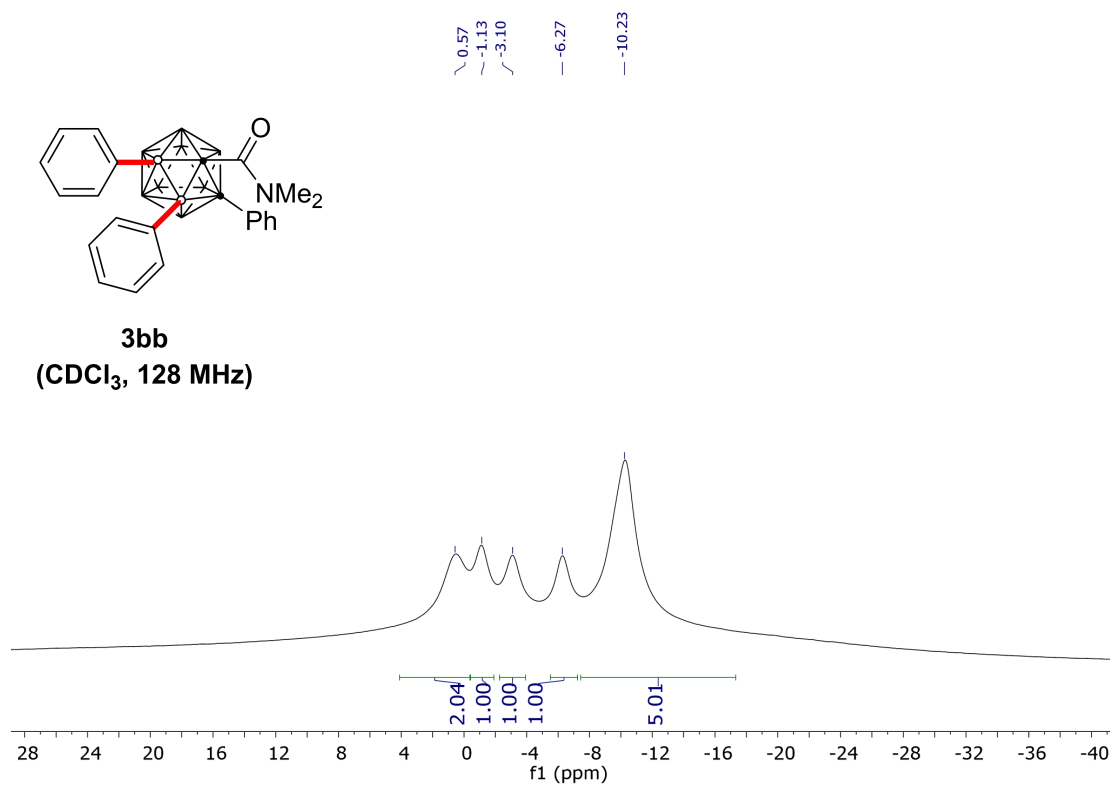



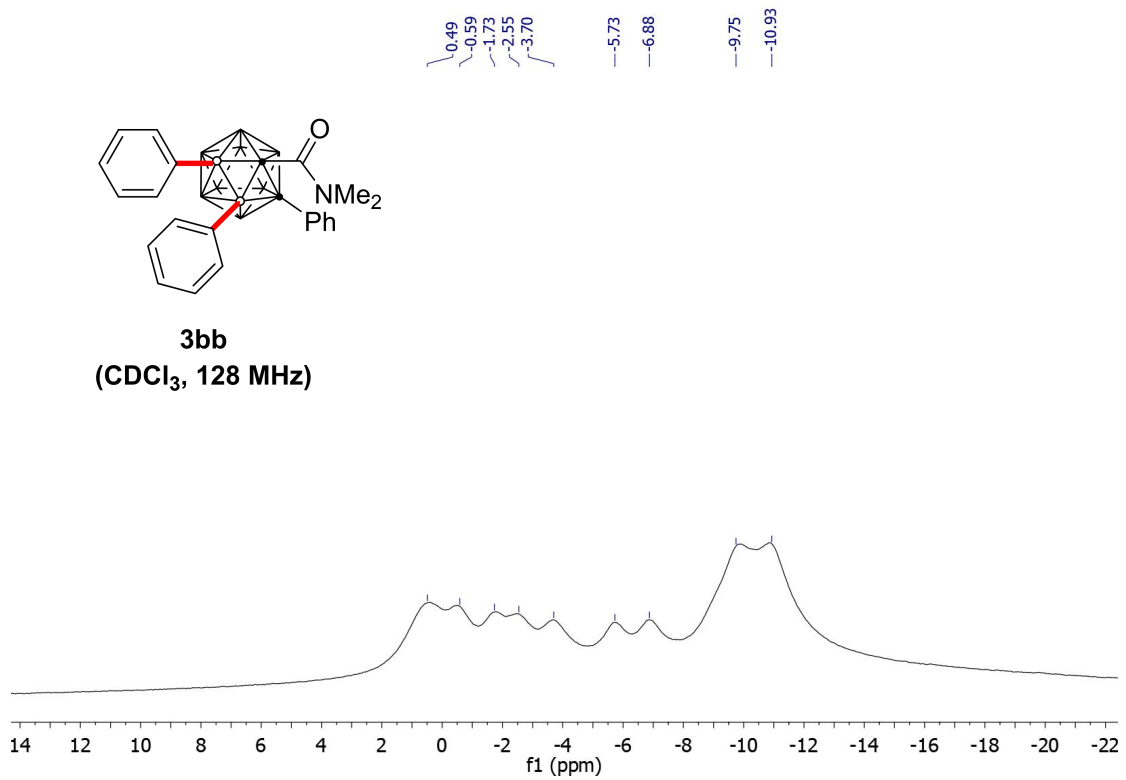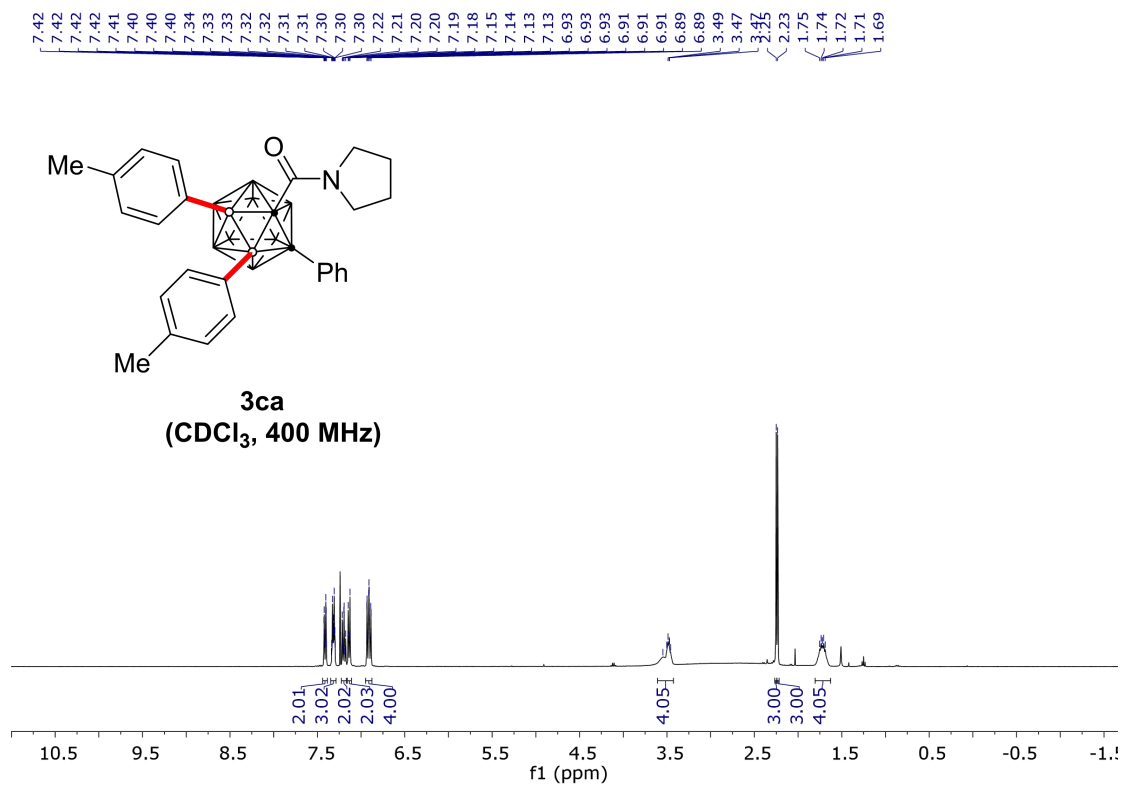

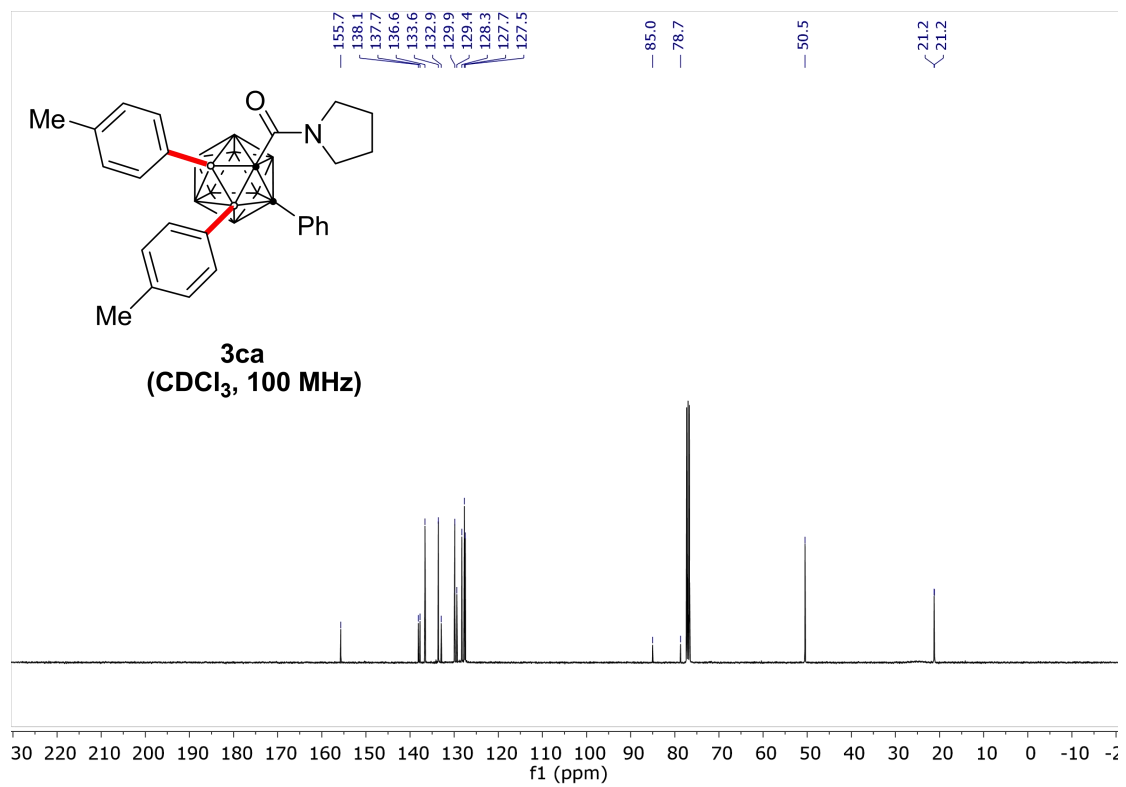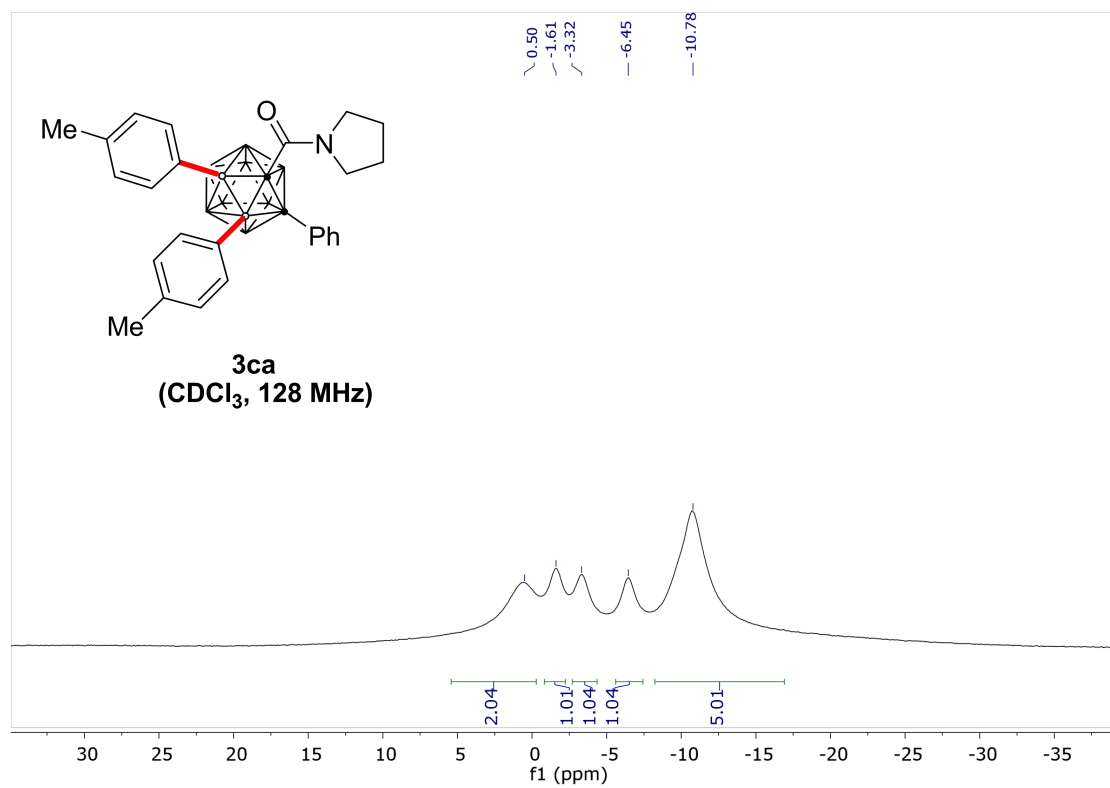

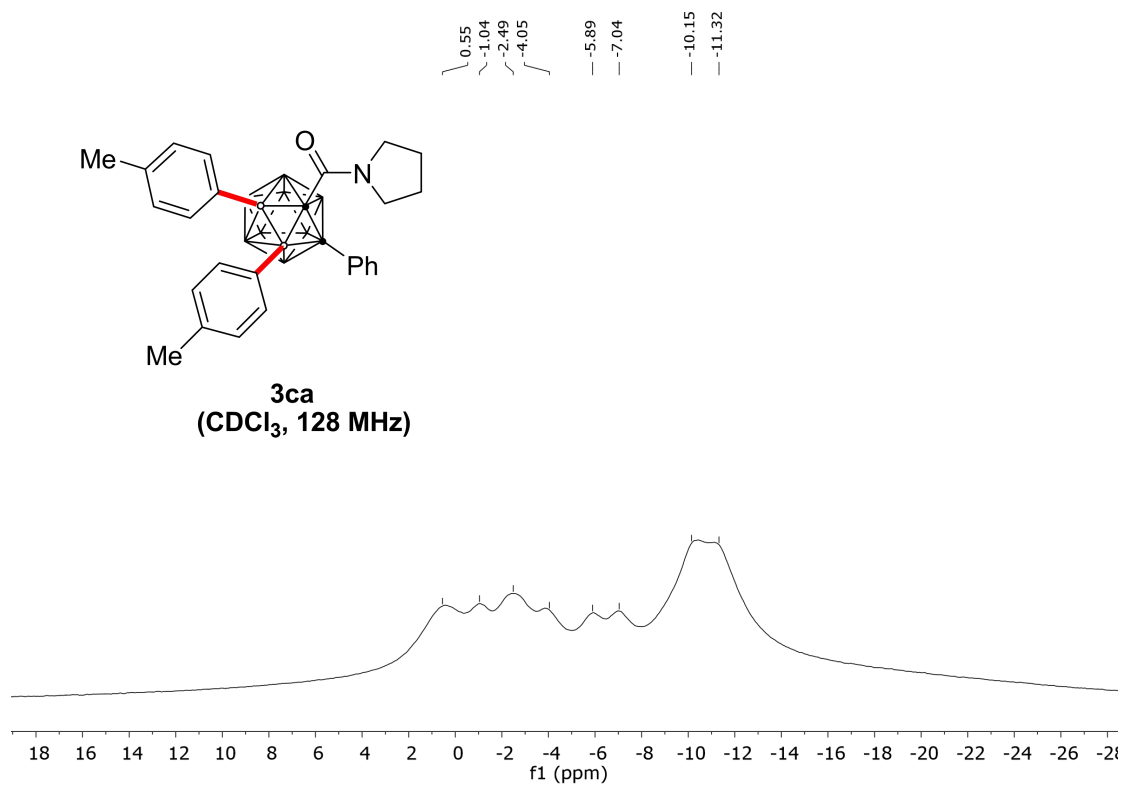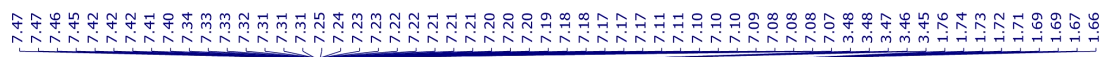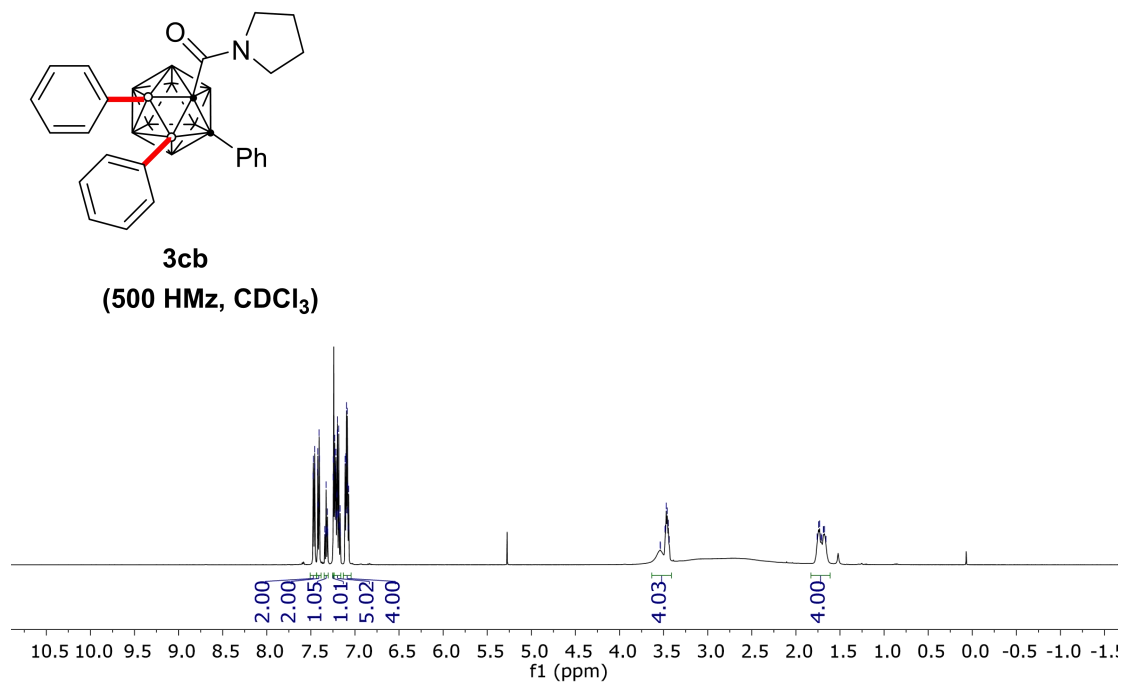

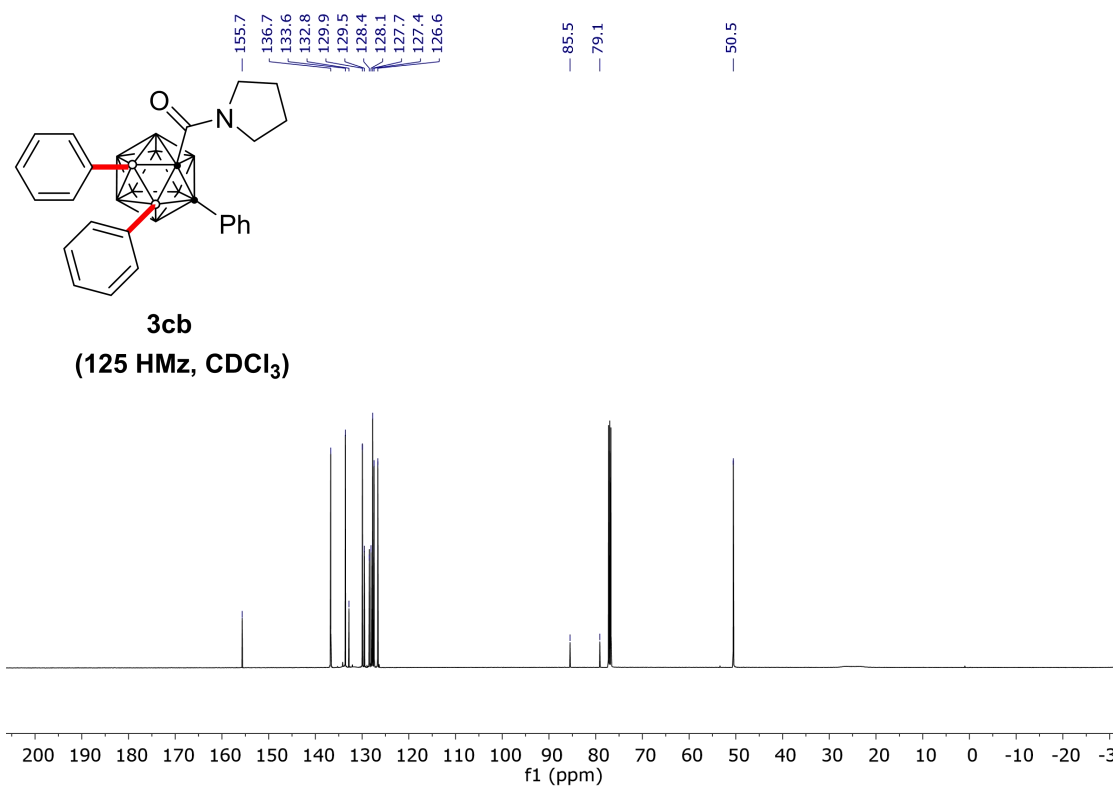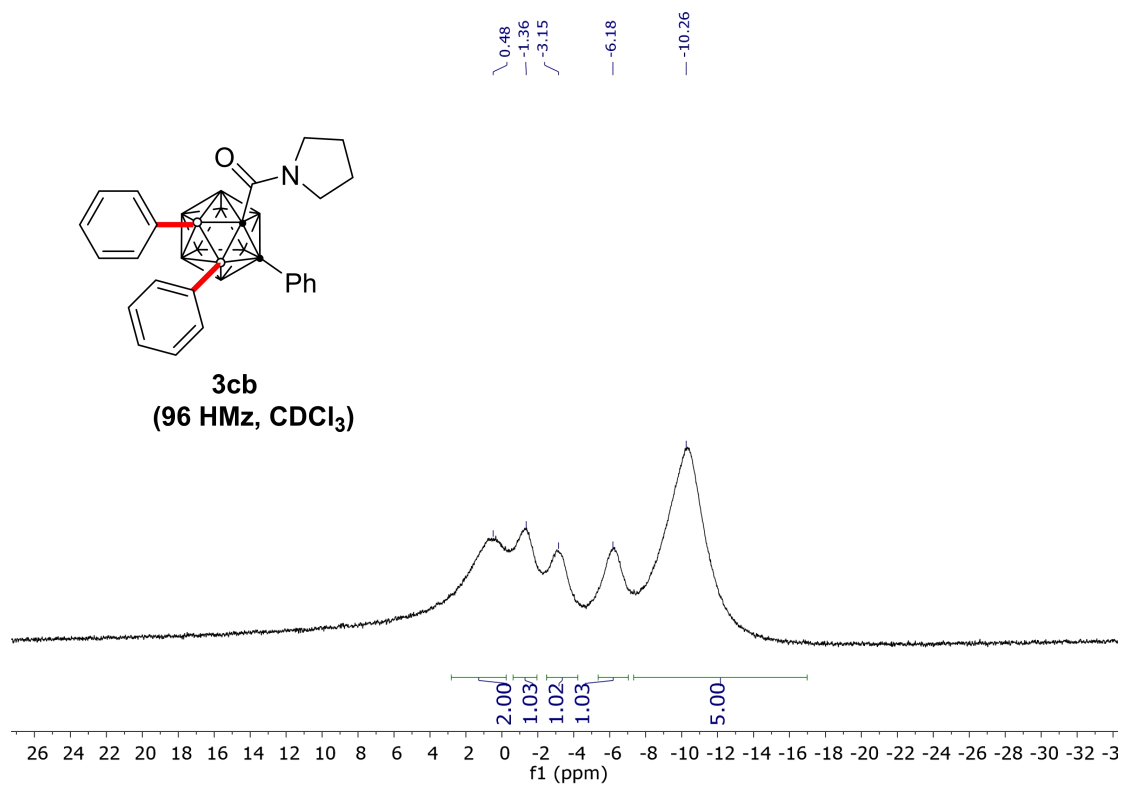

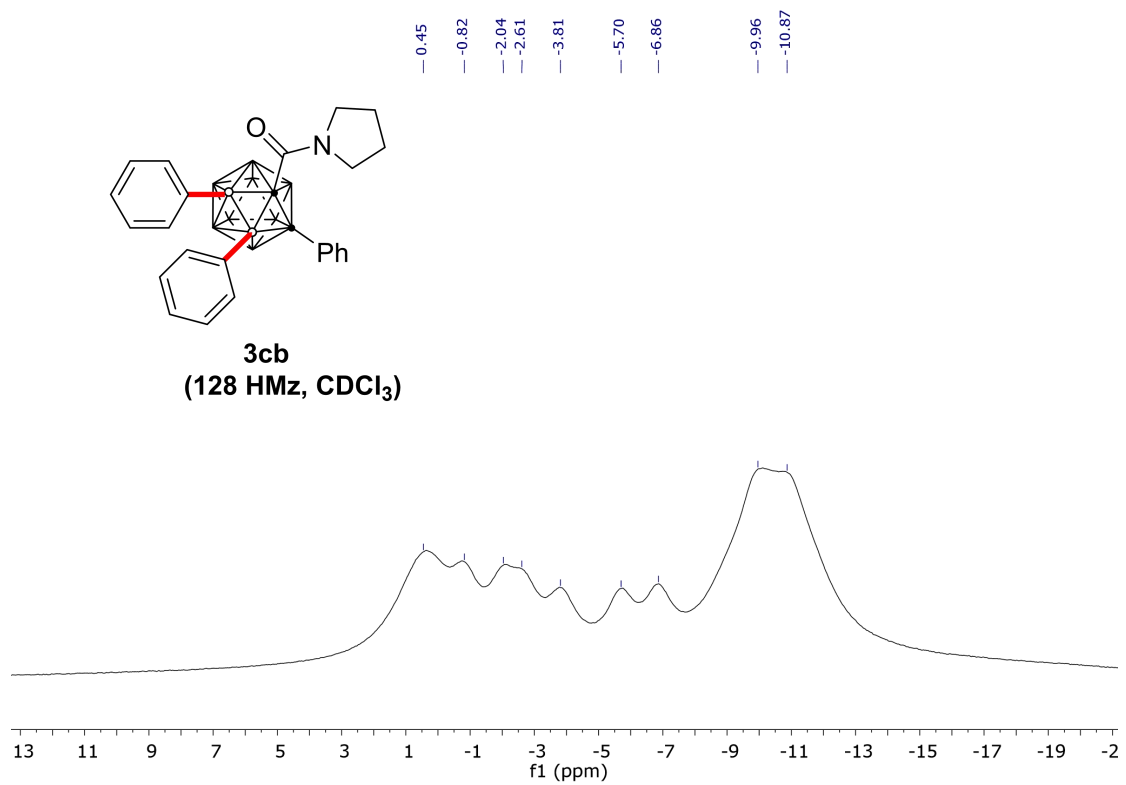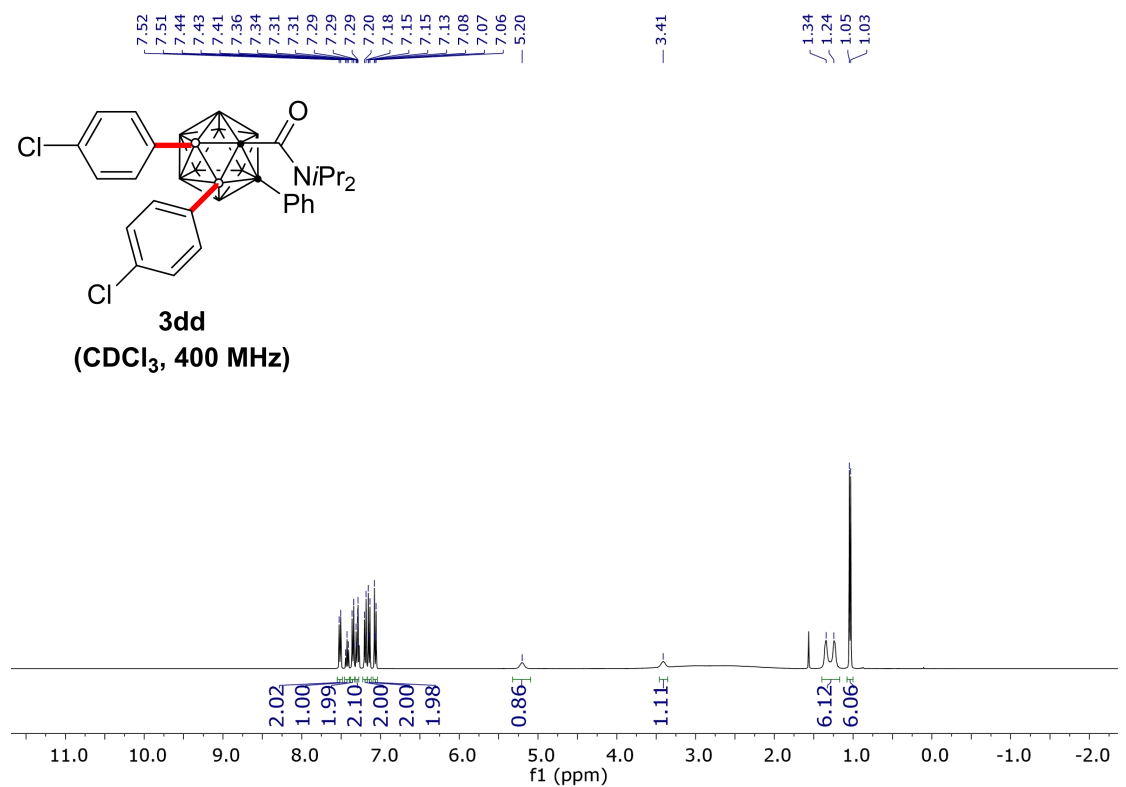

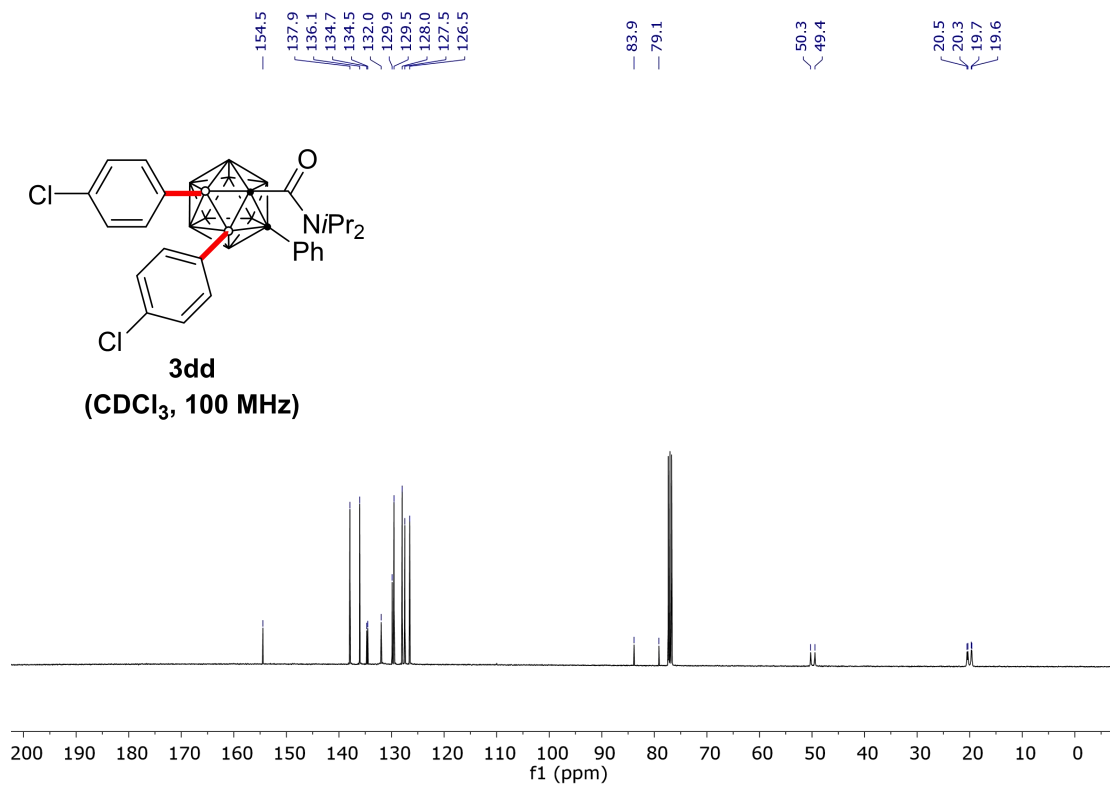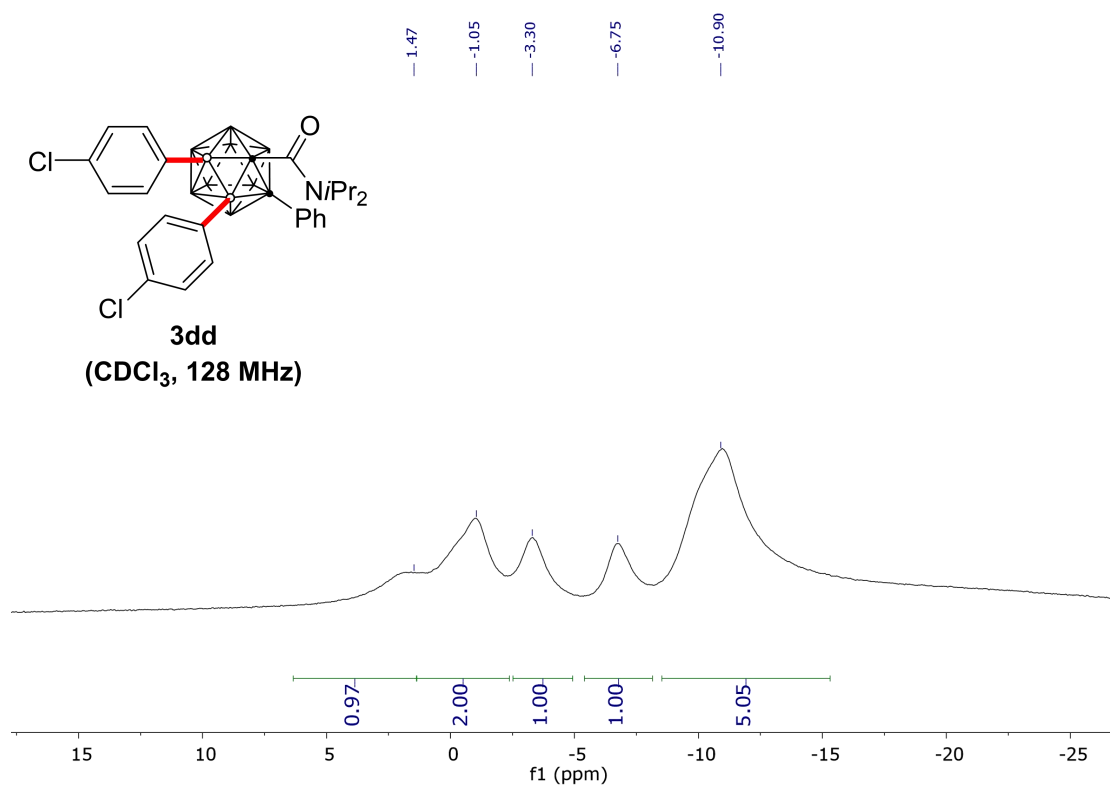



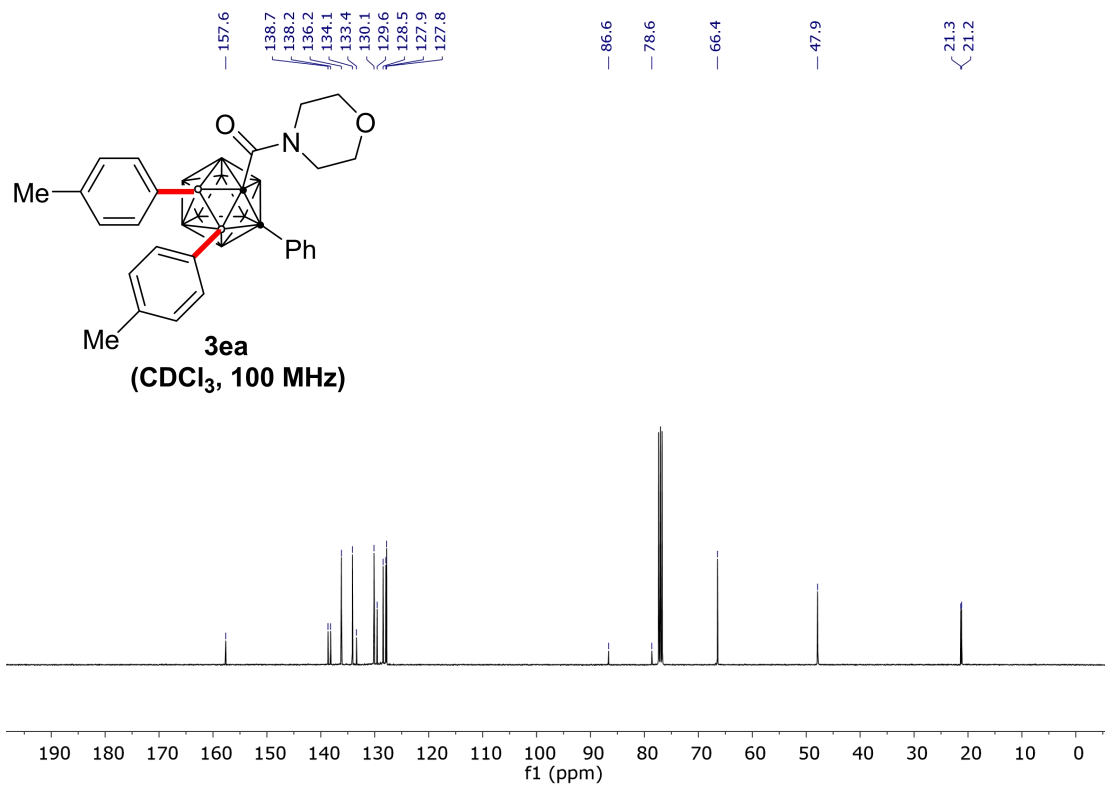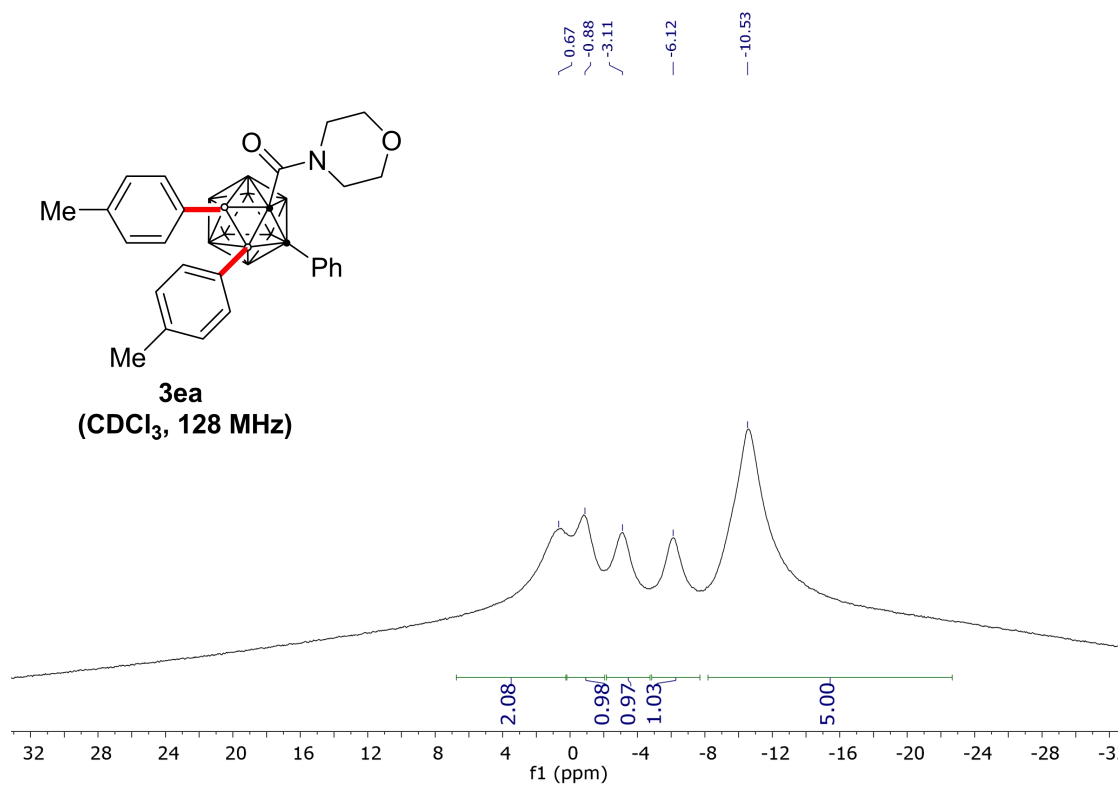



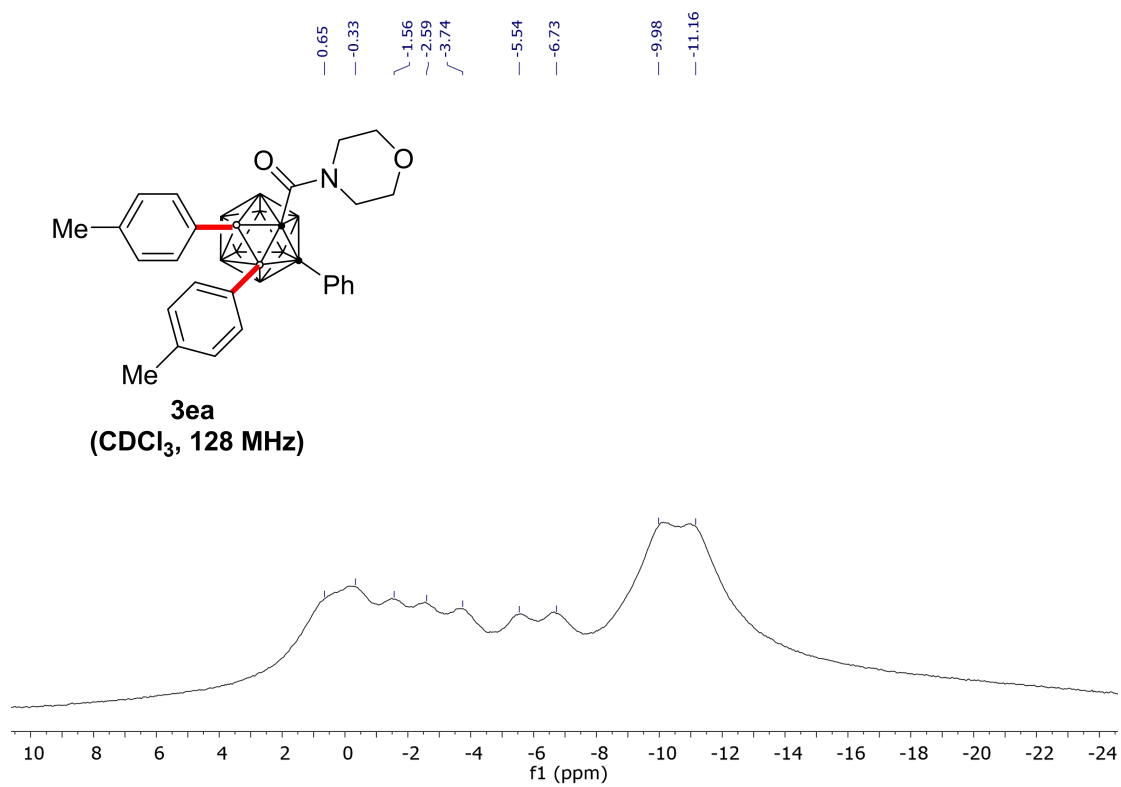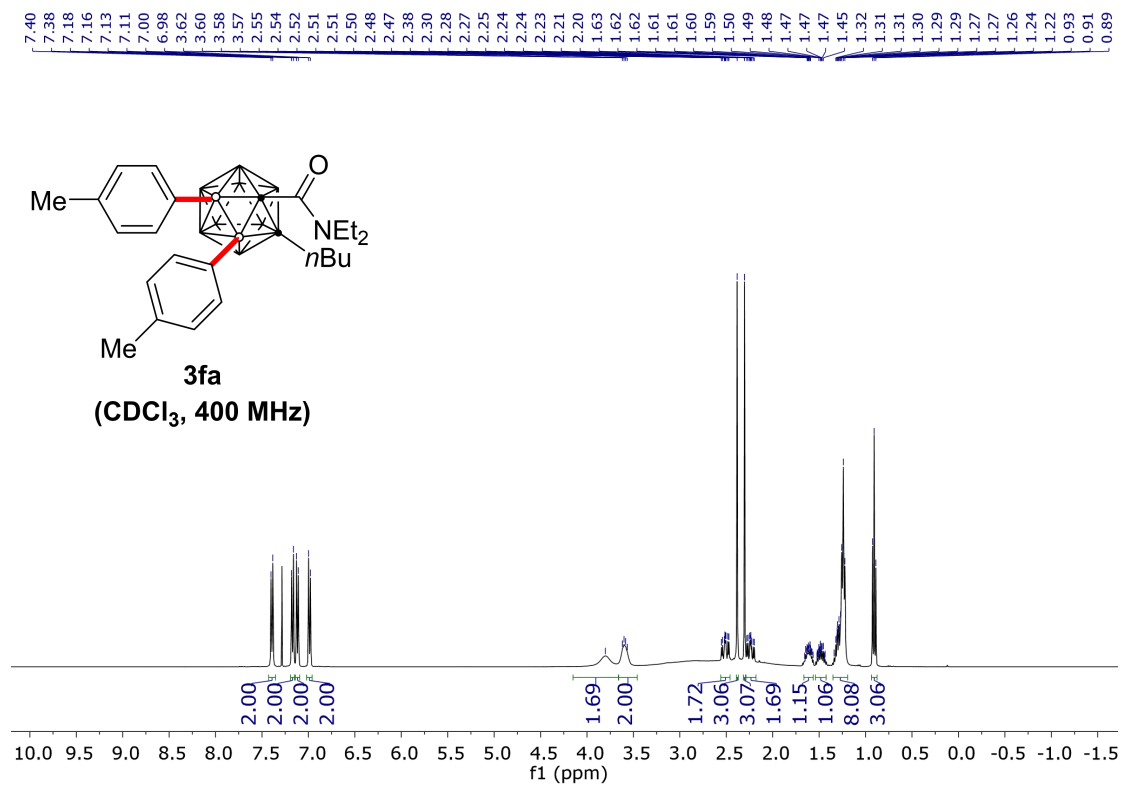

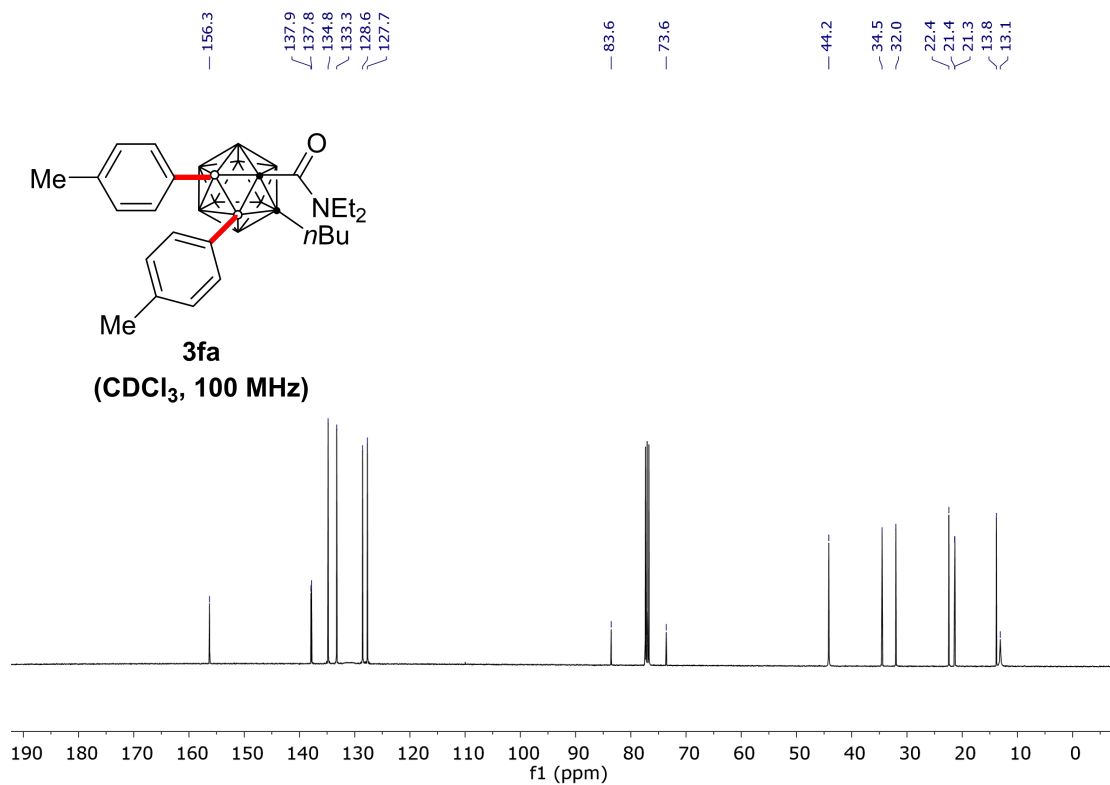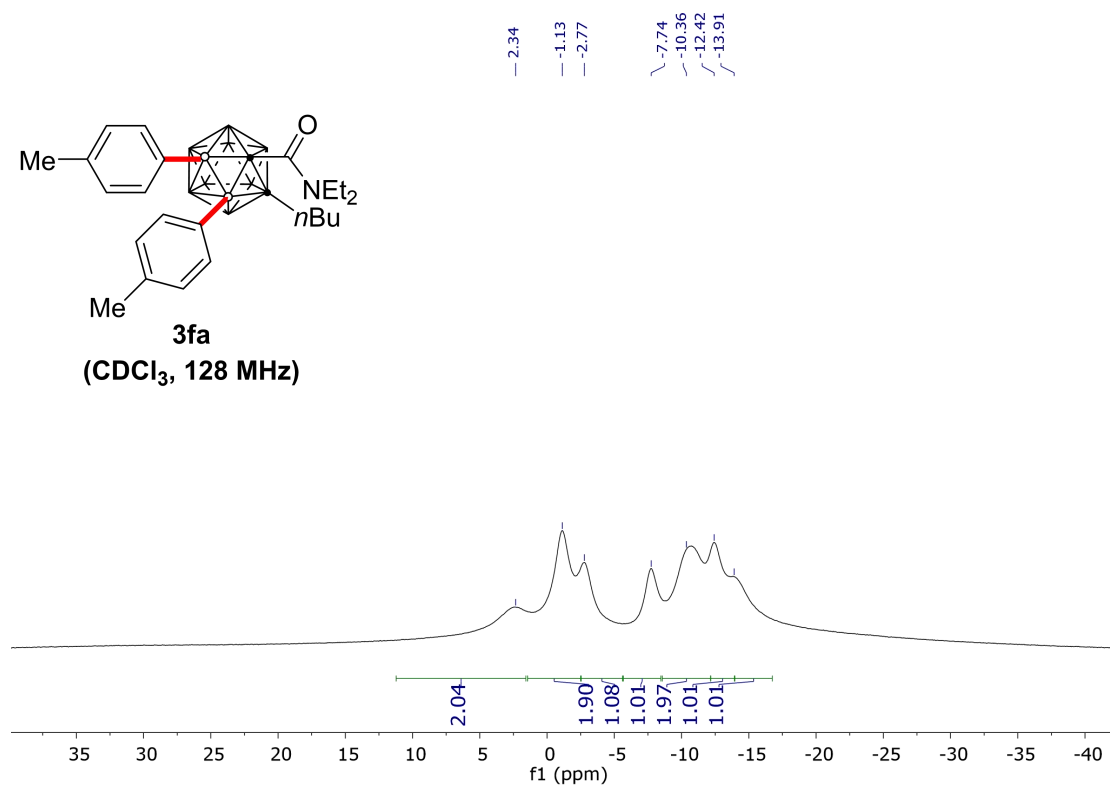

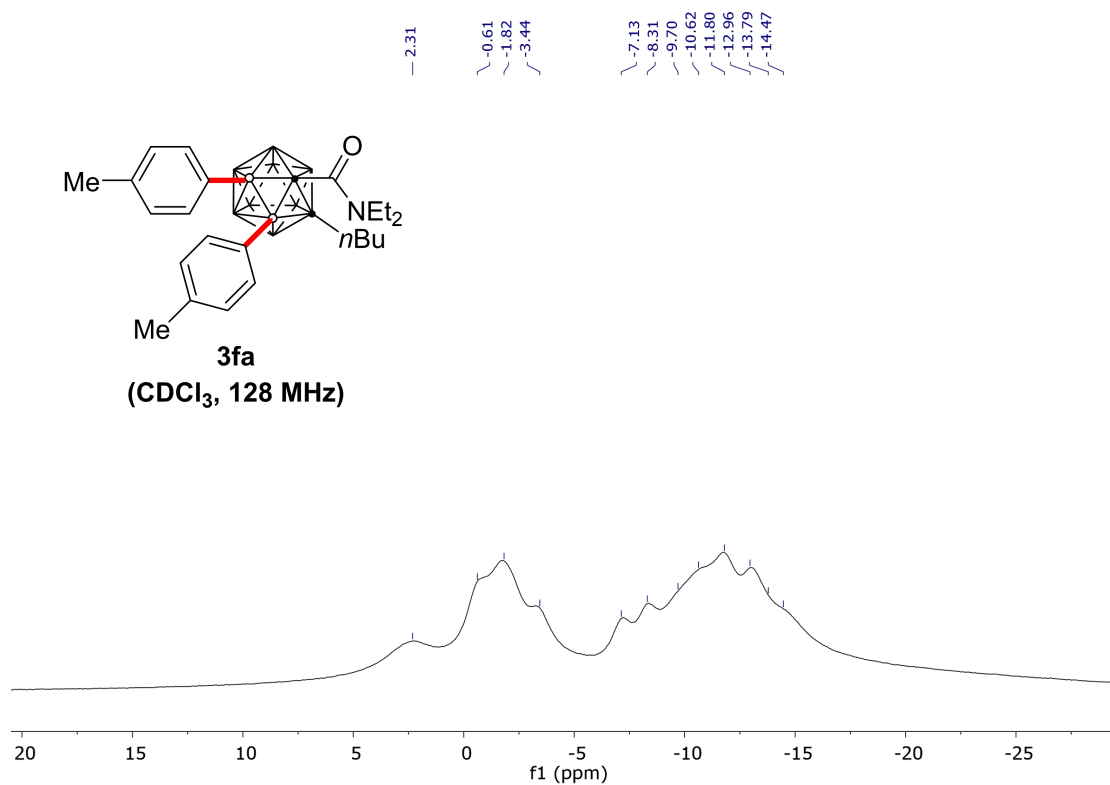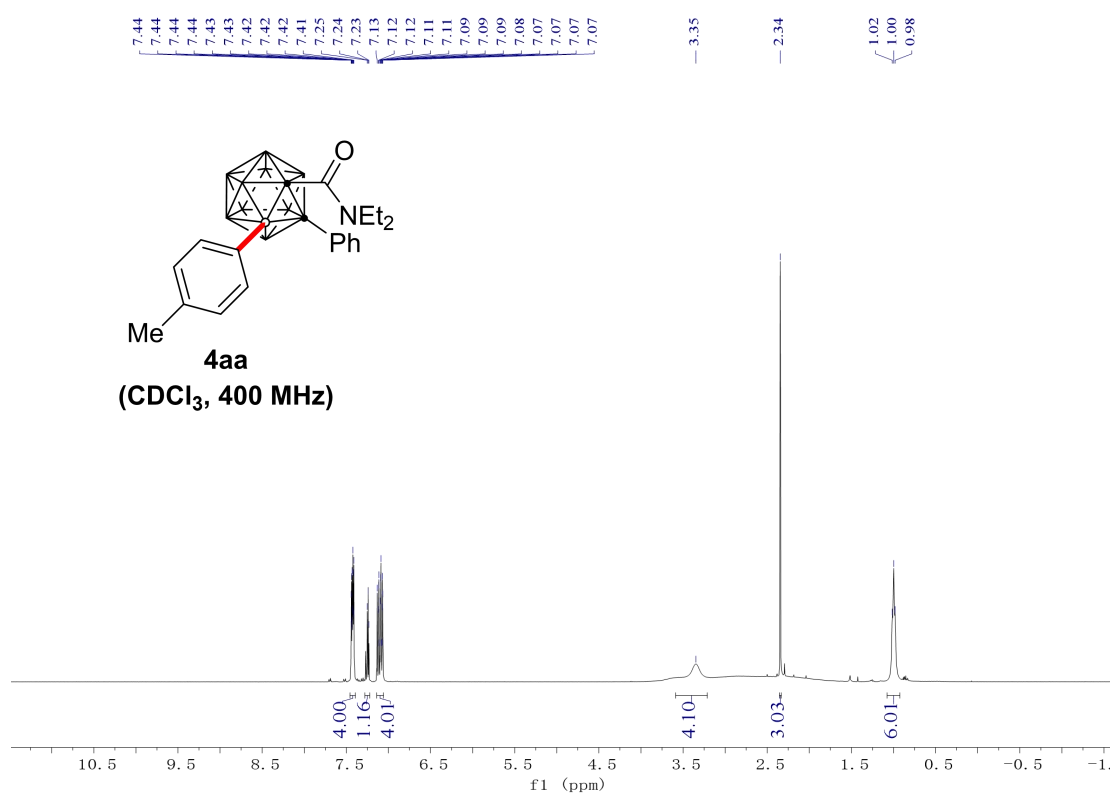

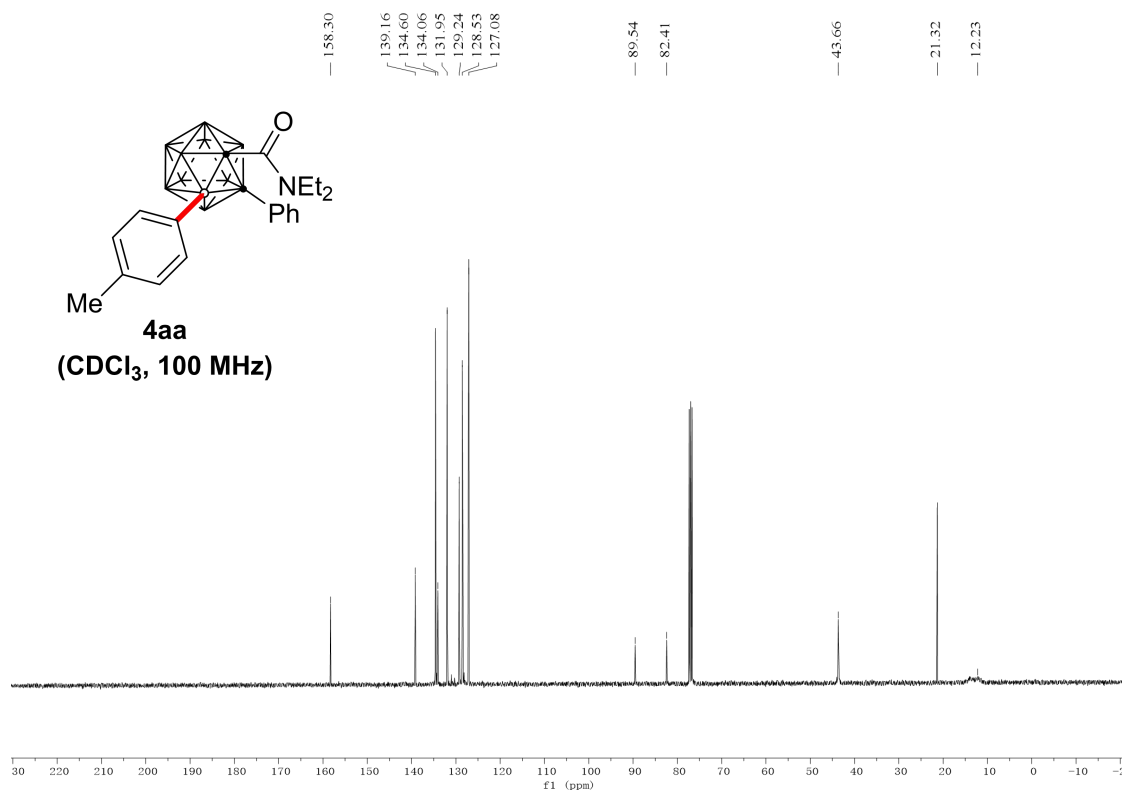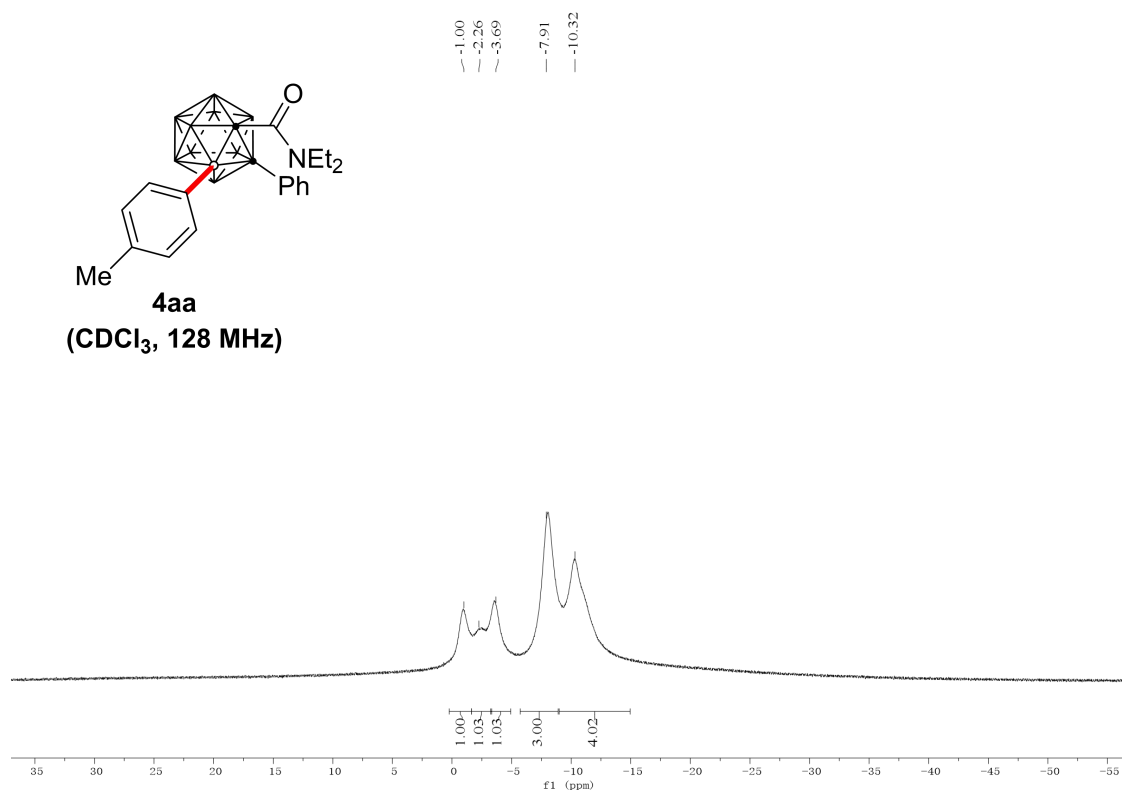

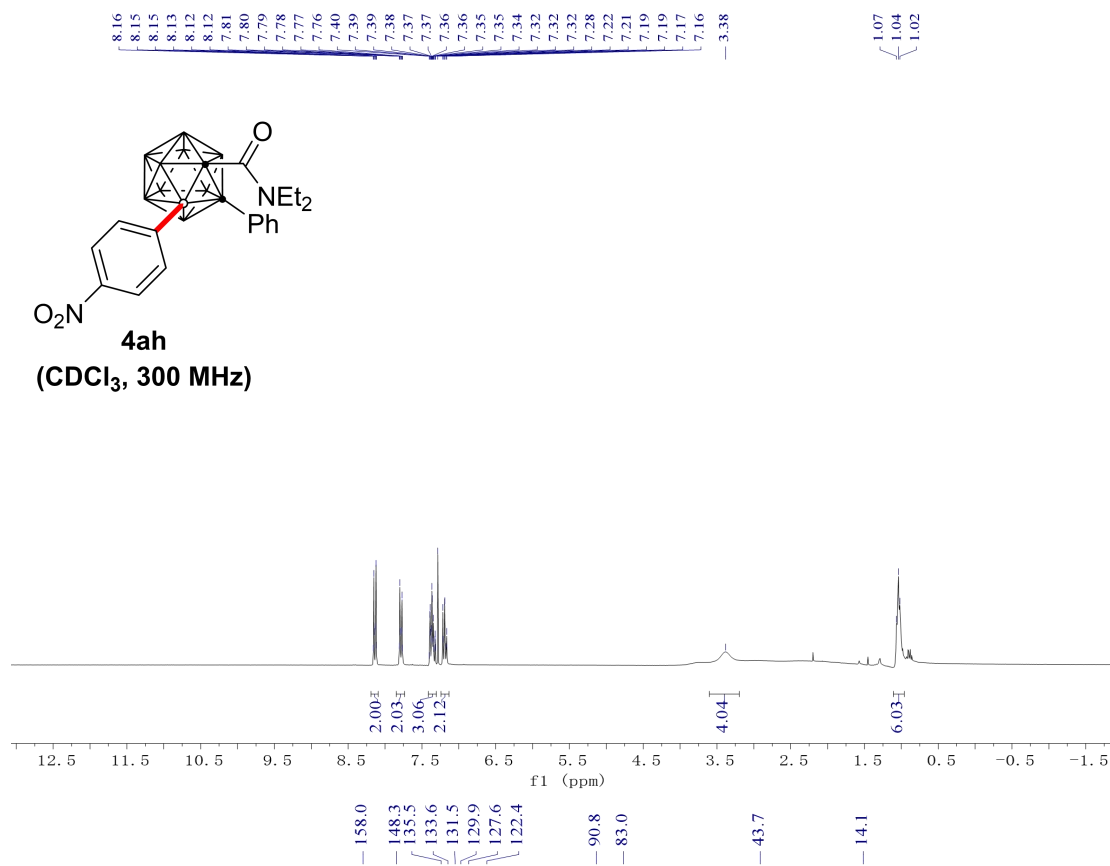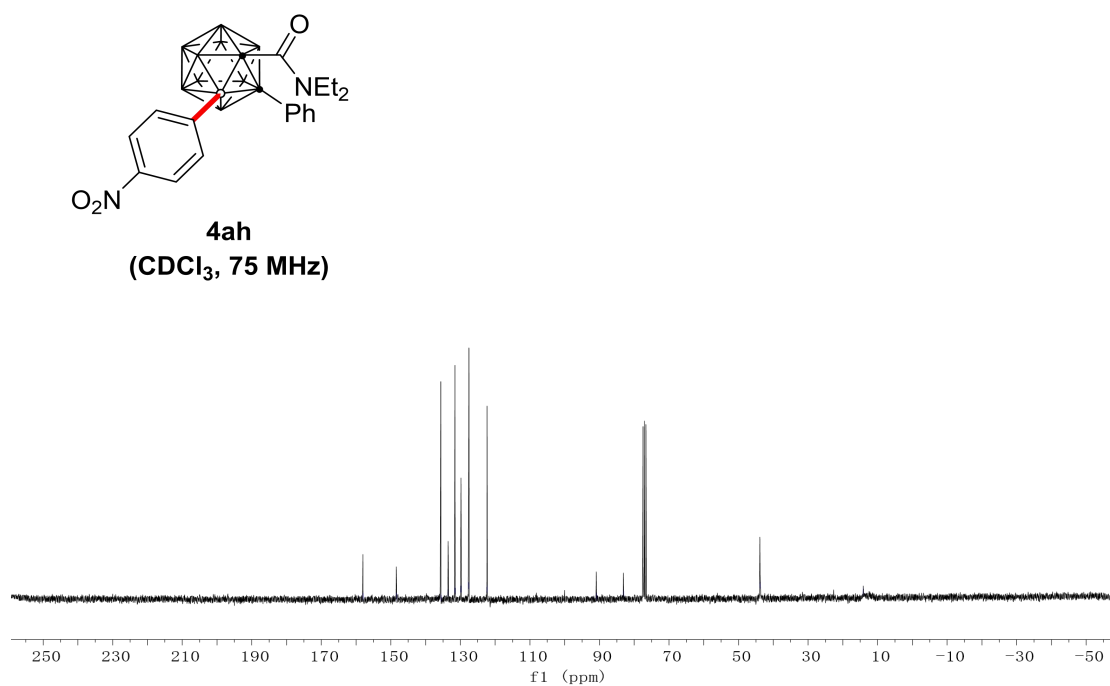

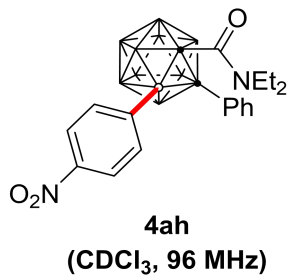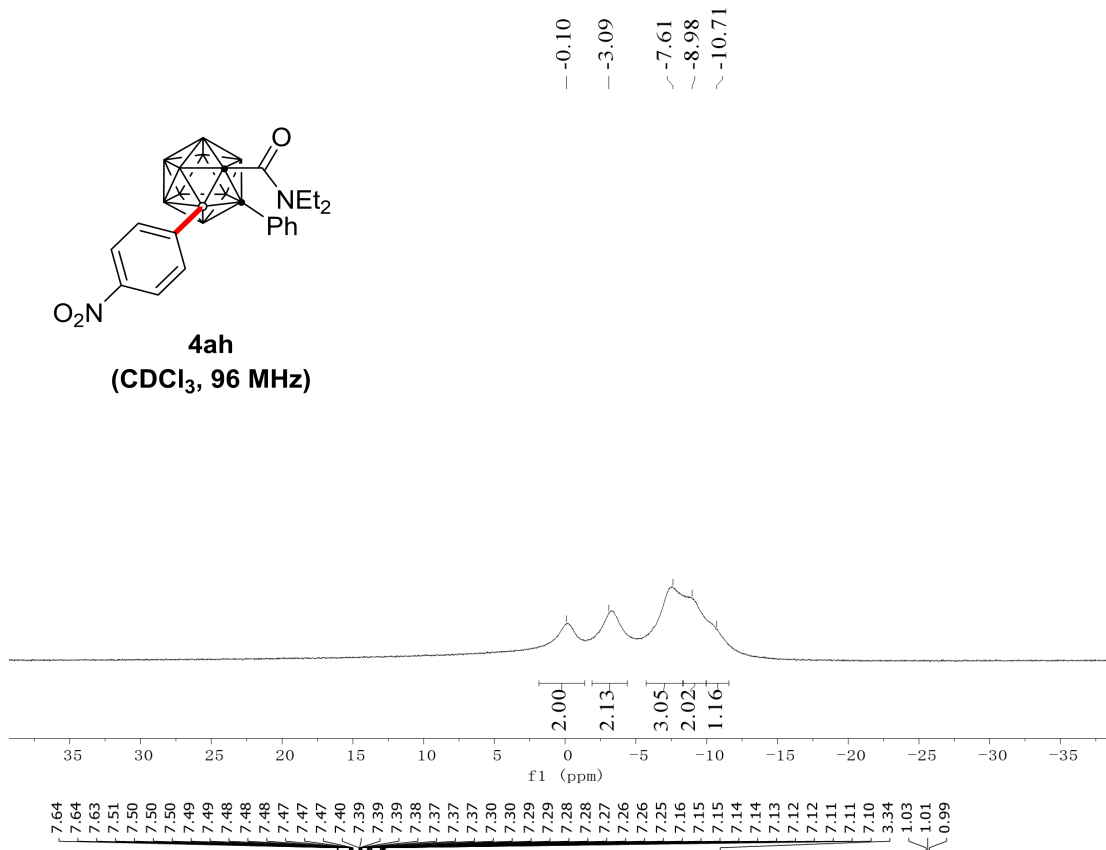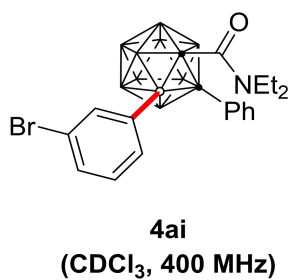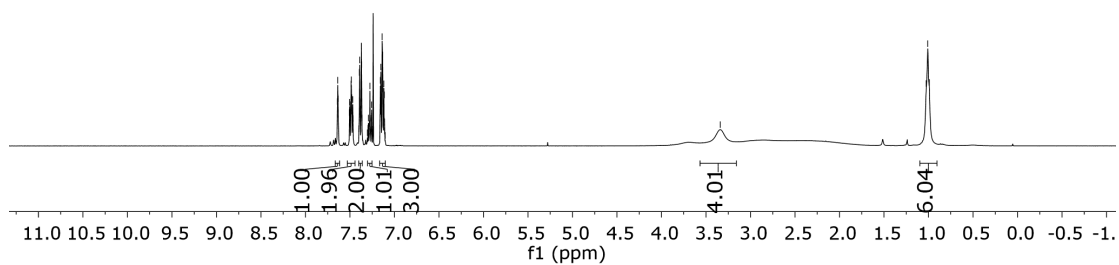

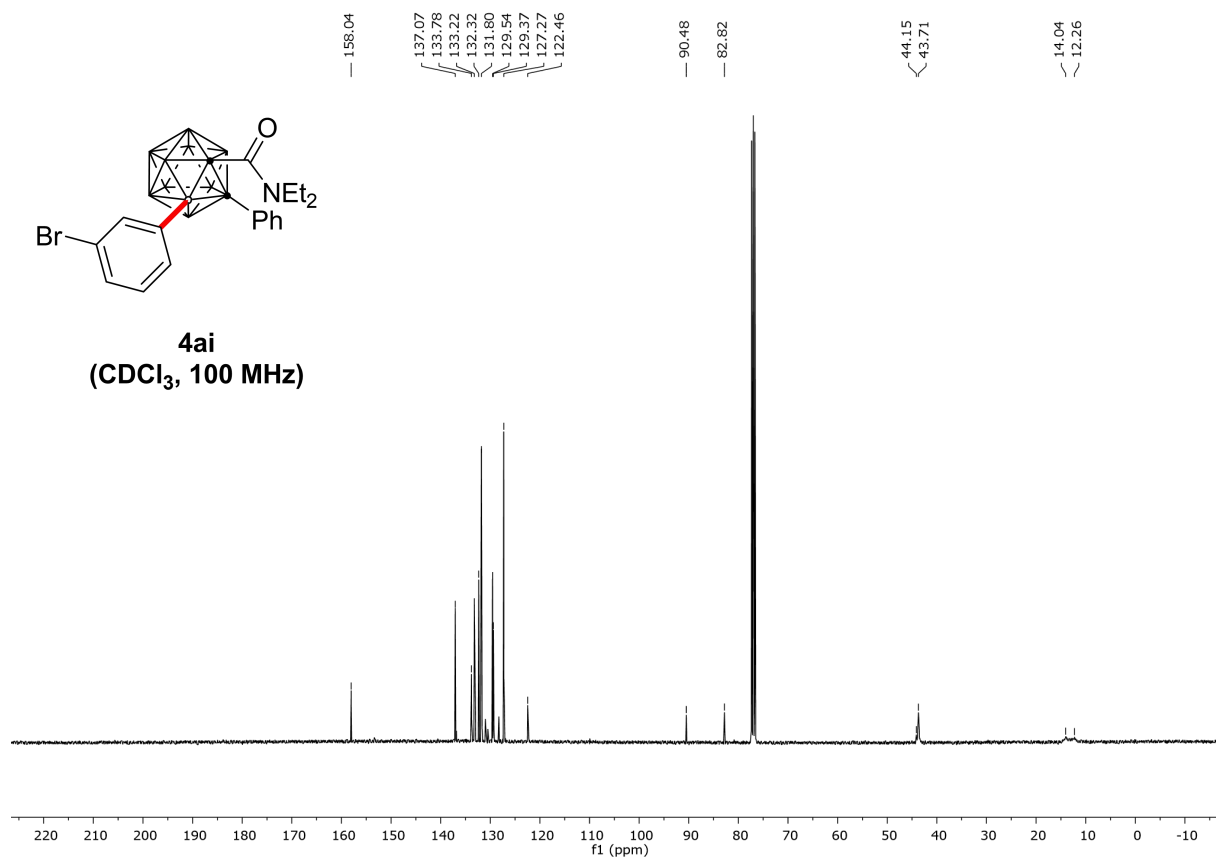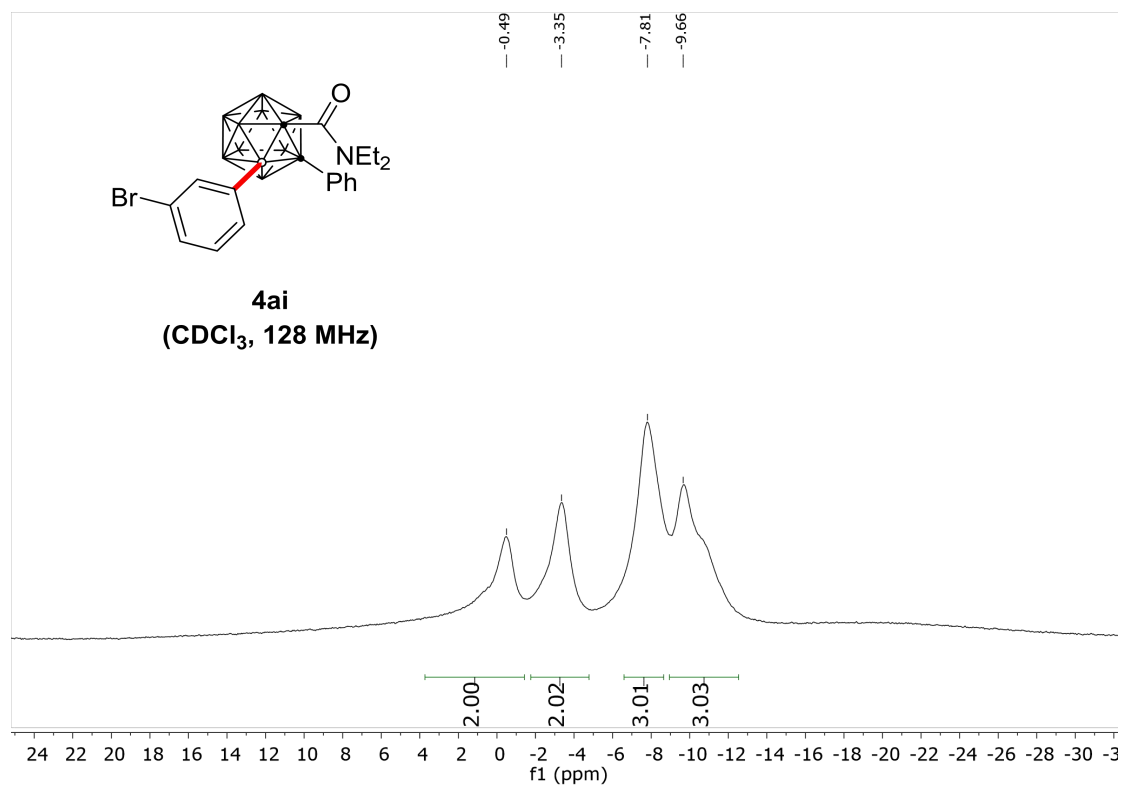

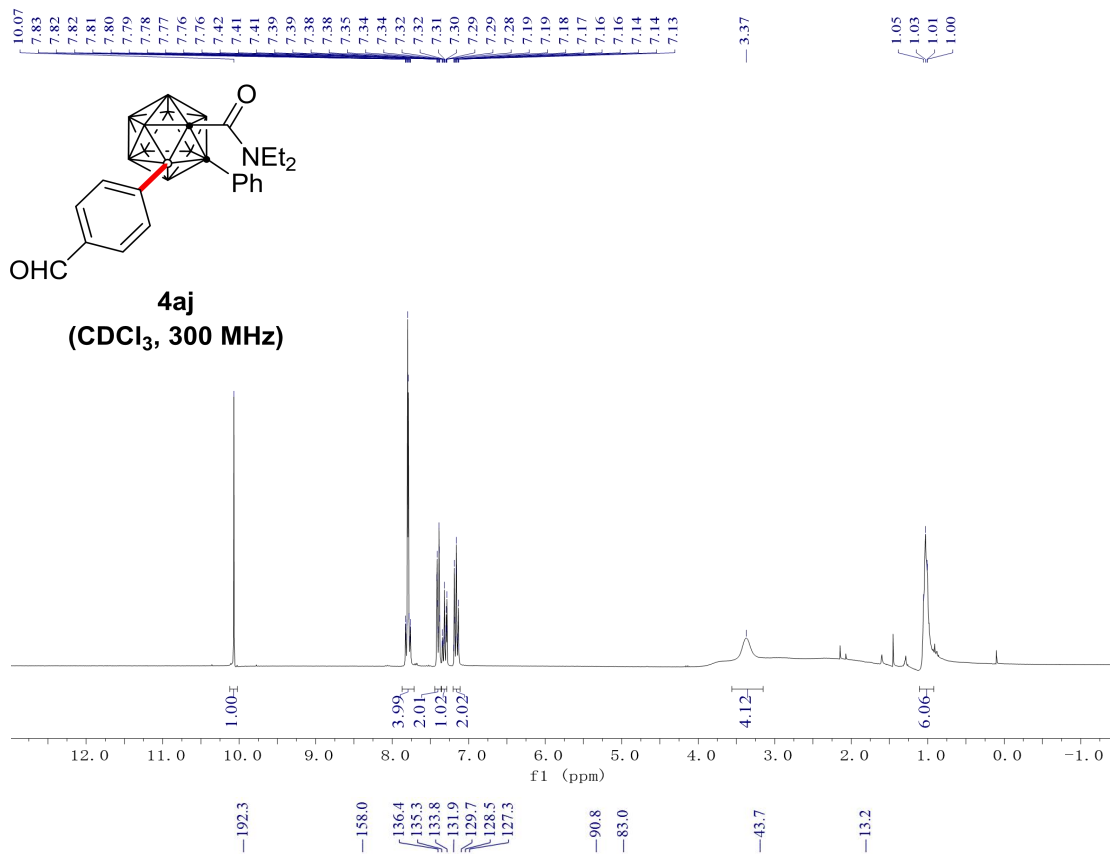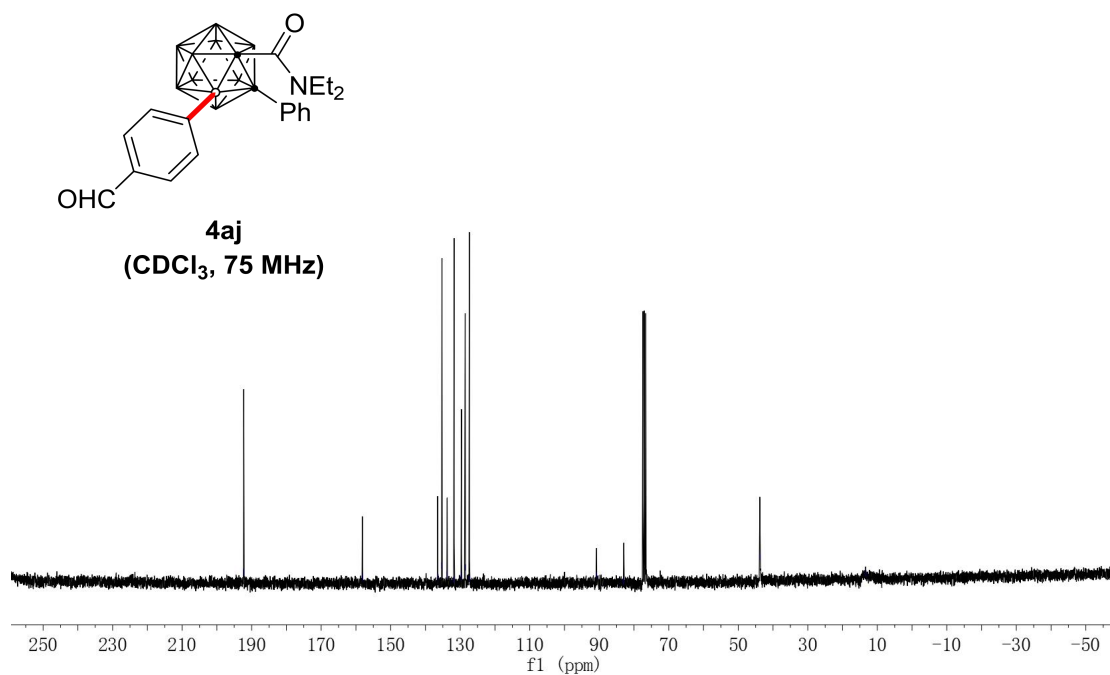



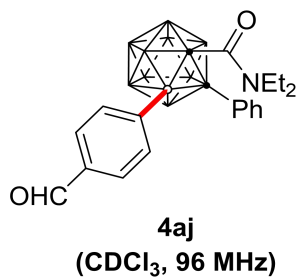

— -0.28  
— -3.35  
~ -7.51  
~ -9.39  
~ -11.02

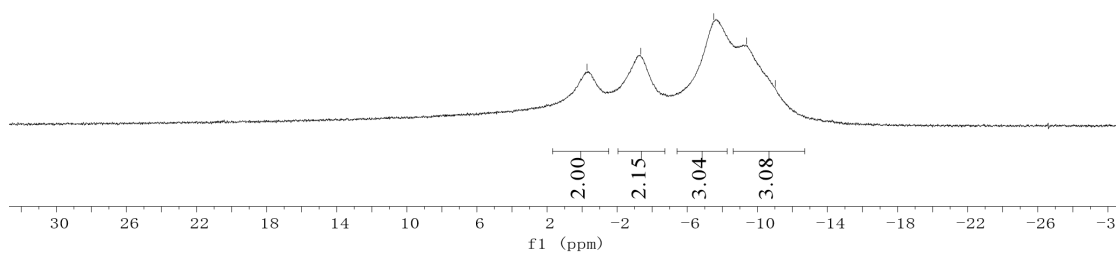

Supplement: SC-011-D0SC01515F-s001.pdf [file SC-011-D0SC01515F-s001.pdf]
